# Supplementary material for: An anciently diverged family of RNA binding proteins maintain correct splicing of a class of ultra-long exons through cryptic splice site repression
Source: bioRxiv preprint, doi:10.1101/2023.08.15.553384, version 2 (2024-05-23)
Supplement: Figure 3 - Source Data 1 [file 553384_file06.xlsx]

## Sheet: Figure3A
Gene Ontology analysis of genes with ultra-long exons that showed splicing defects in RBMX-depleted cells, or were bound by RBMX (GOStats), compared to all HEK293-expressed genes containing ultra-long exons
GOBPID	Pvalue	OddsRatio	ExpCount	Count	Size	Term	GeneRatio	FDR
GO:0090304	3.31031e-10	1.98244	150.921	207	756	nucleic acid metabolic process	0.425926	0.00818632
GO:0006139	2.25822e-08	1.82565	162.699	213	815	nucleobase-containing compound metabolic process	0.438272	0.00818632
GO:0046483	8.13172e-08	1.77845	165.693	214	830	heterocycle metabolic process	0.440329	0.00818632
GO:0051276	9.53131e-08	3.08047	21.5601	45	108	chromosome organization	0.0925926	0.00818632
GO:0006725	1.68042e-07	1.75182	166.891	214	836	cellular aromatic compound metabolic process	0.440329	0.00818632
GO:0034641	1.95951e-07	1.74251	174.876	222	876	cellular nitrogen compound metabolic process	0.45679	0.00818632
GO:0010564	2.15263e-07	2.84075	24.1553	48	121	regulation of cell cycle process	0.0987654	0.00818632
GO:0006259	3.09164e-07	2.3792	36.9316	65	185	DNA metabolic process	0.133745	0.009981
GO:1901360	5.69664e-07	1.70516	171.882	217	861	organic cyclic compound metabolic process	0.446502	0.0100367
GO:0006325	2.00035e-06	2.47111	27.9482	51	140	chromatin organization	0.104938	0.0115365
GO:0019219	2.30744e-06	1.71273	117.782	157	590	regulation of nucleobase-containing compound metabolic process	0.323045	0.0115365
GO:0016070	3.24876e-06	1.67394	133.153	173	667	RNA metabolic process	0.355967	0.0115365
GO:0006281	5.30168e-06	2.54082	23.5564	44	118	DNA repair	0.090535	0.0115365
GO:0000723	5.63766e-06	6.88649	4.79113	15	24	telomere maintenance	0.0308642	0.0115365
GO:0032200	7.27218e-06	6.01748	5.39002	16	27	telomere organization	0.0329218	0.0115365
GO:0019222	8.24031e-06	1.60112	187.652	228	940	regulation of metabolic process	0.469136	0.0115365
GO:0010467	8.58013e-06	1.6064	166.292	206	833	gene expression	0.423868	0.0115365
GO:0022402	1.70722e-05	1.95155	46.5139	72	233	cell cycle process	0.148148	0.0115365
GO:0051052	2.46959e-05	2.72608	16.7689	33	84	regulation of DNA metabolic process	0.0679012	0.0115365
GO:0031323	2.6708e-05	1.56556	159.904	197	801	regulation of cellular metabolic process	0.40535	0.0115365
GO:0007049	3.83469e-05	1.77162	62.6839	90	314	cell cycle	0.185185	0.0115365
GO:0006310	4.00219e-05	3.16246	11.5786	25	58	DNA recombination	0.0514403	0.0115365
GO:0000724	4.28221e-05	3.77317	8.38447	20	42	double-strand break repair via homologous recombination	0.0411523	0.0115365
GO:0006974	4.67119e-05	2.08223	32.3401	53	162	cellular response to DNA damage stimulus	0.109053	0.0115365
GO:0051726	5.67894e-05	1.99371	36.5323	58	183	regulation of cell cycle	0.119342	0.0115365
GO:0006260	6.04972e-05	3.48876	9.18299	21	46	DNA replication	0.0432099	0.0115365
GO:0016071	6.44772e-05	2.13021	28.7468	48	144	mRNA metabolic process	0.0987654	0.0115365
GO:0000725	6.54717e-05	3.60701	8.5841	20	43	recombinational repair	0.0411523	0.0122092
GO:0080090	6.72285e-05	1.52482	166.691	202	835	regulation of primary metabolic process	0.415638	0.0129634
GO:0070925	6.72765e-05	1.96556	37.5305	59	188	organelle assembly	0.121399	0.0131376
GO:0060255	6.83121e-05	1.52074	175.475	211	879	regulation of macromolecule metabolic process	0.434156	0.0144753
GO:0046605	6.8758e-05	7.51623	3.39372	11	17	regulation of centrosome cycle	0.0226337	0.0144753
GO:0051171	7.62376e-05	1.52144	163.098	198	817	regulation of nitrogen compound metabolic process	0.407407	0.0146751
GO:0007420	7.73294e-05	2.12727	28.1479	47	141	brain development	0.0967078	0.0156111
GO:0006366	0.000104927	1.65128	76.4584	104	383	transcription by RNA polymerase II	0.213992	0.0195888
GO:2001020	0.000110053	2.8938	12.1774	25	61	regulation of response to DNA damage stimulus	0.0514403	0.0197469
GO:0006302	0.000111982	2.74959	13.5749	27	68	double-strand break repair	0.0555556	0.0205723
GO:0043170	0.000117989	1.51675	254.129	288	1273	macromolecule metabolic process	0.592593	0.0205723
GO:0006261	0.000123386	4.41418	5.78928	15	29	DNA-templated DNA replication	0.0308642	0.0205723
GO:0006397	0.000125723	2.43042	17.9667	33	90	mRNA processing	0.0679012	0.0205723
GO:0009889	0.000139947	1.53958	116.983	148	586	regulation of biosynthetic process	0.304527	0.0205723
GO:0031326	0.000153693	1.53929	114.388	145	573	regulation of cellular biosynthetic process	0.298354	0.0205723
GO:0032392	0.000155051	9.19149	2.59519	9	13	DNA geometric change	0.0185185	0.0205723
GO:0010556	0.000158113	1.54084	112.591	143	564	regulation of macromolecule biosynthetic process	0.294239	0.0205723
GO:0051172	0.000176471	1.64732	70.2699	96	352	negative regulation of nitrogen compound metabolic process	0.197531	0.0205723
GO:0006357	0.000182981	1.63097	73.8632	100	370	regulation of transcription by RNA polymerase II	0.205761	0.0205723
GO:0010948	0.000186031	3.10949	9.78189	21	49	negative regulation of cell cycle process	0.0432099	0.0205723
GO:0044260	0.000244636	1.54751	97.8189	126	490	cellular macromolecule metabolic process	0.259259	0.0219111
GO:0051252	0.000246134	1.52478	109.797	139	550	regulation of RNA metabolic process	0.286008	0.0229865
GO:0007548	0.000281937	3.50651	7.38632	17	37	sex differentiation	0.0349794	0.0229865
GO:0046599	0.00029977	14.2471	1.79667	7	9	regulation of centriole replication	0.0144033	0.0229865
GO:0008380	0.000309129	2.30897	17.9667	32	90	RNA splicing	0.0658436	0.0229865
GO:0044839	0.000331757	4.4471	4.99076	13	25	cell cycle G2/M phase transition	0.026749	0.0229865
GO:0051053	0.000331757	4.4471	4.99076	13	25	negative regulation of DNA metabolic process	0.026749	0.0229865
GO:0031324	0.000335659	1.62808	66.0776	90	331	negative regulation of cellular metabolic process	0.185185	0.0229865
GO:2000042	0.000357948	24.3803	1.39741	6	7	negative regulation of double-strand break repair via homologous recombination	0.0123457	0.0229865
GO:0007099	0.000358021	7.34894	2.79482	9	14	centriole replication	0.0185185	0.0229865
GO:0071103	0.000358021	7.34894	2.79482	9	14	DNA conformation change	0.0185185	0.0229865
GO:0006996	0.000358448	1.49359	118.98	148	596	organelle organization	0.304527	0.0229865
GO:0010468	0.000382887	1.47252	135.15	165	677	regulation of gene expression	0.339506	0.0229865
GO:0006396	0.000406822	1.90498	31.5416	49	158	RNA processing	0.100823	0.0229865
GO:0060322	0.000413468	1.93073	29.9445	47	150	head development	0.0967078	0.0229865
GO:0009892	0.000414358	1.54125	88.8355	115	445	negative regulation of metabolic process	0.236626	0.0229865
GO:2001251	0.000458423	5.83954	3.39372	10	17	negative regulation of chromosome organization	0.0205761	0.0229865
GO:0006338	0.000463821	2.27173	17.5675	31	88	chromatin remodeling	0.063786	0.0229865
GO:0007059	0.000487693	2.22933	18.366	32	92	chromosome segregation	0.0658436	0.0229865
GO:0043009	0.000489855	2.02729	24.5545	40	123	chordate embryonic development	0.0823045	0.0229865
GO:0009792	0.000494084	2.00696	25.353	41	127	embryo development ending in birth or egg hatching	0.0843621	0.0229865
GO:0045786	0.000498589	2.64928	11.7782	23	59	negative regulation of cell cycle	0.0473251	0.0229865
GO:0045934	0.000506176	1.72821	45.1165	65	226	negative regulation of nucleobase-containing compound metabolic process	0.133745	0.0229865
GO:0010569	0.000518904	5.00211	3.99261	11	20	regulation of double-strand break repair via homologous recombination	0.0226337	0.0229865
GO:0008406	0.00052624	3.83381	5.78928	14	29	gonad development	0.0288066	0.0229865
GO:0045137	0.00052624	3.83381	5.78928	14	29	development of primary sexual characteristics	0.0288066	0.0229865
GO:0000018	0.000544961	4.47013	4.5915	12	23	regulation of DNA recombination	0.0246914	0.0229865
GO:0010605	0.000549305	1.54113	83.0462	108	416	negative regulation of macromolecule metabolic process	0.222222	0.0229865
GO:0032508	0.000551084	8.15094	2.39556	8	12	DNA duplex unwinding	0.0164609	0.0229865
GO:0051054	0.000664111	2.90512	9.18299	19	46	positive regulation of DNA metabolic process	0.0390947	0.0229865
GO:2001141	0.000695752	1.496	97.22	123	487	regulation of RNA biosynthetic process	0.253086	0.0229865
GO:0045935	0.000730213	1.58265	65.6784	88	329	positive regulation of nucleobase-containing compound metabolic process	0.18107	0.0229865
GO:0000245	0.000738439	6.12057	2.99445	9	15	spliceosomal complex assembly	0.0185185	0.0229865
GO:0002200	0.000738439	6.12057	2.99445	9	15	somatic diversification of immune receptors	0.0185185	0.0229865
GO:0045911	0.000738439	6.12057	2.99445	9	15	positive regulation of DNA recombination	0.0185185	0.0229865
GO:0098534	0.000738439	6.12057	2.99445	9	15	centriole assembly	0.0185185	0.0229865
GO:0090068	0.000759909	2.9687	8.5841	18	43	positive regulation of cell cycle process	0.037037	0.0229865
GO:0006355	0.000807824	1.4894	96.6211	122	484	regulation of DNA-templated transcription	0.251029	0.0237012
GO:0140694	0.000863869	2.19298	17.3678	30	87	non-membrane-bounded organelle assembly	0.0617284	0.0245819
GO:1903506	0.00088555	1.48421	96.8207	122	485	regulation of nucleic acid-templated transcription	0.251029	0.0245819
GO:0000086	0.000896672	4.49929	4.19224	11	21	G2/M transition of mitotic cell cycle	0.0226337	0.0245819
GO:0051298	0.000896672	4.49929	4.19224	11	21	centrosome duplication	0.0226337	0.026614
GO:0009059	0.000921382	1.43192	135.349	163	678	macromolecule biosynthetic process	0.335391	0.026614
GO:0007417	0.00100981	1.7822	34.3364	51	172	central nervous system development	0.104938	0.026614
GO:0001701	0.00110612	2.29588	14.573	26	73	in utero embryonic development	0.0534979	0.026614
GO:0022613	0.00110612	2.29588	14.573	26	73	ribonucleoprotein complex biogenesis	0.0534979	0.026614
GO:0045910	0.00119046	12.1831	1.59704	6	8	negative regulation of DNA recombination	0.0123457	0.026614
GO:0090114	0.00119046	12.1831	1.59704	6	8	COPII-coated vesicle budding	0.0123457	0.026614
GO:0048608	0.00121032	2.91526	8.18484	17	41	reproductive structure development	0.0349794	0.026614
GO:0061458	0.00121032	2.91526	8.18484	17	41	reproductive system development	0.0349794	0.026614
GO:0033044	0.0012368	2.70159	9.58226	19	48	regulation of chromosome organization	0.0390947	0.026614
GO:0032774	0.00124633	1.45684	102.211	127	512	RNA biosynthetic process	0.261317	0.026614
GO:0044770	0.0013549	2.08229	18.5656	31	93	cell cycle phase transition	0.063786	0.026614
GO:0032204	0.00139316	5.24316	3.19409	9	16	regulation of telomere maintenance	0.0185185	0.026614
GO:0032465	0.00139316	5.24316	3.19409	9	16	regulation of cytokinesis	0.0185185	0.026614
GO:1902749	0.00139316	5.24316	3.19409	9	16	regulation of cell cycle G2/M phase transition	0.0185185	0.026614
GO:0001824	0.00147618	4.08789	4.39187	11	22	blastocyst development	0.0226337	0.026614
GO:0010165	0.00155951	20.2693	1.19778	5	6	response to X-ray	0.0102881	0.026614
GO:0045830	0.00157059	Inf	0.798521	4	4	positive regulation of isotype switching	0.00823045	0.026614
GO:0071824	0.00157094	3.07914	6.98706	15	35	protein-DNA complex subunit organization	0.0308642	0.026614
GO:0034654	0.00158555	1.4276	113.989	139	571	nucleobase-containing compound biosynthetic process	0.286008	0.026614
GO:0060271	0.00165923	2.25136	14.1738	25	71	cilium assembly	0.0514403	0.026614
GO:0044271	0.00174008	1.40331	133.153	159	667	cellular nitrogen compound biosynthetic process	0.32716	0.0274347
GO:0006351	0.00180228	1.43894	101.213	125	507	DNA-templated transcription	0.257202	0.0293737
GO:0016445	0.00188797	7.11529	2.19593	7	11	somatic diversification of immunoglobulins	0.0144033	0.0298558
GO:1902115	0.00193547	2.64596	9.18299	18	46	regulation of organelle assembly	0.037037	0.0298889
GO:0097659	0.00196013	1.43412	101.412	125	508	nucleic acid-templated transcription	0.257202	0.0299828
GO:0080135	0.00201529	1.8688	24.5545	38	123	regulation of cellular response to stress	0.0781893	0.030457
GO:0044085	0.00217381	1.41873	108.2	132	542	cellular component biogenesis	0.271605	0.030457
GO:0000375	0.00220395	2.32933	12.1774	22	61	RNA splicing, via transesterification reactions	0.0452675	0.030457
GO:0000377	0.00220395	2.32933	12.1774	22	61	RNA splicing, via transesterification reactions with bulged adenosine as nucleophile	0.0452675	0.030457
GO:0000398	0.00220395	2.32933	12.1774	22	61	mRNA splicing, via spliceosome	0.0452675	0.030457
GO:0007098	0.00220992	2.9308	7.18669	15	36	centrosome cycle	0.0308642	0.030457
GO:0022618	0.00220992	2.9308	7.18669	15	36	ribonucleoprotein complex assembly	0.0308642	0.030457
GO:0010824	0.00228703	5.42767	2.79482	8	14	regulation of centrosome duplication	0.0164609	0.030457
GO:0031297	0.00228703	5.42767	2.79482	8	14	replication fork processing	0.0164609	0.030457
GO:0018130	0.00236412	1.40584	114.987	139	576	heterocycle biosynthetic process	0.286008	0.030457
GO:0019438	0.00236412	1.40584	114.987	139	576	aromatic compound biosynthetic process	0.286008	0.030457
GO:0034728	0.00244475	4.58511	3.39372	9	17	nucleosome organization	0.0185185	0.030457
GO:0044237	0.00270157	1.37282	259.32	285	1299	cellular metabolic process	0.58642	0.030457
GO:0008152	0.00275623	1.40378	296.85	321	1487	metabolic process	0.660494	0.0312701
GO:0032259	0.00279552	2.26976	12.3771	22	62	methylation	0.0452675	0.0319408
GO:0010557	0.00292263	1.50019	63.8817	83	320	positive regulation of macromolecule biosynthetic process	0.170782	0.0320188
GO:0045738	0.00297184	8.11737	1.79667	6	9	negative regulation of DNA repair	0.0123457	0.0320188
GO:2000780	0.00297184	8.11737	1.79667	6	9	negative regulation of double-strand break repair	0.0123457	0.0320188
GO:1903047	0.00300709	1.75754	28.3475	42	142	mitotic cell cycle process	0.0864198	0.0322502
GO:0022607	0.00303483	1.41149	100.614	123	504	cellular component assembly	0.253086	0.0322502
GO:1901362	0.00310425	1.38872	117.582	141	589	organic cyclic compound biosynthetic process	0.290123	0.0322502
GO:0043414	0.00310473	2.35368	10.9797	20	55	macromolecule methylation	0.0411523	0.0322502
GO:0044782	0.00319229	2.10976	14.7726	25	74	cilium organization	0.0514403	0.0322502
GO:0016043	0.00324887	1.34826	203.224	229	1018	cellular component organization	0.471193	0.0322502
GO:2001022	0.00352365	2.86699	6.78743	14	34	positive regulation of response to DNA damage stimulus	0.0288066	0.0322502
GO:0006282	0.00353824	2.62615	8.18484	16	41	regulation of DNA repair	0.0329218	0.0322502
GO:0048513	0.00363643	1.41735	90.8318	112	455	animal organ development	0.230453	0.0322502
GO:1904356	0.00375961	5.68894	2.39556	7	12	regulation of telomere maintenance via telomere lengthening	0.0144033	0.0322502
GO:1901987	0.0038093	2.10889	14.1738	24	71	regulation of cell cycle phase transition	0.0493827	0.0322502
GO:0000077	0.00383955	3.70745	4.19224	10	21	DNA damage checkpoint signaling	0.0205761	0.0322502
GO:2000779	0.00404772	2.95439	6.18854	13	31	regulation of double-strand break repair	0.026749	0.0322502
GO:0010833	0.00405684	4.6496	2.99445	8	15	telomere maintenance via telomere lengthening	0.0164609	0.0322502
GO:0009891	0.00406405	1.46657	67.2754	86	337	positive regulation of biosynthetic process	0.176955	0.0322502
GO:0071826	0.00413793	2.67282	7.58595	15	38	ribonucleoprotein complex subunit organization	0.0308642	0.0322502
GO:0031328	0.00448071	1.46502	65.6784	84	329	positive regulation of cellular biosynthetic process	0.17284	0.0322502
GO:0001825	0.0045634	10.1288	1.39741	5	7	blastocyst formation	0.0102881	0.0324404
GO:0032205	0.0045634	10.1288	1.39741	5	7	negative regulation of telomere maintenance	0.0102881	0.0326002
GO:2000001	0.0045634	10.1288	1.39741	5	7	regulation of DNA damage checkpoint	0.0102881	0.0331641
GO:0031503	0.00461633	3.06429	5.58965	12	28	protein-containing complex localization	0.0246914	0.0331641
GO:0006807	0.00470548	1.34686	264.111	288	1323	nitrogen compound metabolic process	0.592593	0.0339454
GO:0071840	0.00477192	1.32966	208.414	233	1044	cellular component organization or biogenesis	0.479424	0.0344424
GO:0044772	0.00477374	2.02462	15.1719	25	76	mitotic cell cycle phase transition	0.0514403	0.0351075
GO:0009790	0.00486172	1.58479	40.1257	55	201	embryo development	0.113169	0.0351075
GO:0033365	0.00513274	1.63991	33.3383	47	167	protein localization to organelle	0.0967078	0.0351075
GO:0045893	0.00541948	1.48976	55.2976	72	277	positive regulation of DNA-templated transcription	0.148148	0.0351075
GO:1902680	0.00541948	1.48976	55.2976	72	277	positive regulation of RNA biosynthetic process	0.148148	0.0351075
GO:1903508	0.00541948	1.48976	55.2976	72	277	positive regulation of nucleic acid-templated transcription	0.148148	0.0351075
GO:0051254	0.00544867	1.46828	60.6876	78	304	positive regulation of RNA metabolic process	0.160494	0.0351075
GO:0042770	0.00560681	2.79726	6.38817	13	32	signal transduction in response to DNA damage	0.026749	0.0351075
GO:0000280	0.00569847	2.02041	14.573	24	73	nuclear division	0.0493827	0.0351075
GO:0031570	0.00580902	3.39652	4.39187	10	22	DNA integrity checkpoint signaling	0.0205761	0.0355217
GO:0045787	0.00594814	2.23058	10.78	19	54	positive regulation of cell cycle	0.0390947	0.035676
GO:0044238	0.00616753	1.33927	275.29	298	1379	primary metabolic process	0.613169	0.035676
GO:0046660	0.00618762	6.08451	1.9963	6	10	female sex differentiation	0.0123457	0.035676
GO:0002714	0.00660811	16.1776	0.998152	4	5	positive regulation of B cell mediated immunity	0.00823045	0.035676
GO:0002891	0.00660811	16.1776	0.998152	4	5	positive regulation of immunoglobulin mediated immune response	0.00823045	0.035676
GO:0032467	0.00660811	16.1776	0.998152	4	5	positive regulation of cytokinesis	0.00823045	0.035676
GO:0033260	0.00660811	16.1776	0.998152	4	5	nuclear DNA replication	0.00823045	0.035676
GO:0044786	0.00660811	16.1776	0.998152	4	5	cell cycle DNA replication	0.00823045	0.035676
GO:0045191	0.00660811	16.1776	0.998152	4	5	regulation of isotype switching	0.00823045	0.035676
GO:1902679	0.00663315	1.58655	36.3327	50	182	negative regulation of RNA biosynthetic process	0.102881	0.035676
GO:0045005	0.00672052	4.06604	3.19409	8	16	DNA-templated DNA replication maintenance of fidelity	0.0164609	0.035676
GO:0098813	0.00680351	2.01607	13.9741	23	70	nuclear chromosome segregation	0.0473251	0.035676
GO:0031023	0.00725703	2.45612	7.98521	15	40	microtubule organizing center organization	0.0308642	0.035676
GO:1901988	0.00725703	2.45612	7.98521	15	40	negative regulation of cell cycle phase transition	0.0308642	0.035676
GO:0045739	0.00745032	2.99082	5.19039	11	26	positive regulation of DNA repair	0.0226337	0.035676
GO:0045892	0.00774494	1.57658	35.7338	49	179	negative regulation of DNA-templated transcription	0.100823	0.035676
GO:0021537	0.00790894	2.34066	8.78373	16	44	telencephalon development	0.0329218	0.035676
GO:0000054	0.00791152	Inf	0.598891	3	3	ribosomal subunit export from nucleus	0.00617284	0.035676
GO:0000056	0.00791152	Inf	0.598891	3	3	ribosomal small subunit export from nucleus	0.00617284	0.035676
GO:0001541	0.00791152	Inf	0.598891	3	3	ovarian follicle development	0.00617284	0.035676
GO:0006972	0.00791152	Inf	0.598891	3	3	hyperosmotic response	0.00617284	0.035676
GO:0007413	0.00791152	Inf	0.598891	3	3	axonal fasciculation	0.00617284	0.035676
GO:0033750	0.00791152	Inf	0.598891	3	3	ribosome localization	0.00617284	0.035676
GO:0044387	0.00791152	Inf	0.598891	3	3	negative regulation of protein kinase activity by regulation of protein phosphorylation	0.00617284	0.036603
GO:0048793	0.00791152	Inf	0.598891	3	3	pronephros development	0.00617284	0.0374321
GO:0071481	0.00791152	Inf	0.598891	3	3	cellular response to X-ray	0.00617284	0.0384606
GO:0106030	0.00791152	Inf	0.598891	3	3	neuron projection fasciculation	0.00617284	0.0384606
GO:0071704	0.00820232	1.33312	288.665	310	1446	organic substance metabolic process	0.63786	0.0384606
GO:0048523	0.0082696	1.31967	138.543	160	694	negative regulation of cellular process	0.329218	0.0384606
GO:0010212	0.00848534	3.13343	4.5915	10	23	response to ionizing radiation	0.0205761	0.0384606
GO:0034502	0.00848534	3.13343	4.5915	10	23	protein localization to chromosome	0.0205761	0.0384606
GO:1902117	0.00848534	3.13343	4.5915	10	23	positive regulation of organelle assembly	0.0205761	0.0384606
GO:1903507	0.00868772	1.56357	35.9335	49	180	negative regulation of nucleic acid-templated transcription	0.100823	0.0384606
GO:0000075	0.00890067	2.72063	5.98891	12	30	cell cycle checkpoint signaling	0.0246914	0.0384606
GO:0031325	0.0101117	1.35002	94.4251	113	473	positive regulation of cellular metabolic process	0.23251	0.0385821
GO:0002204	0.010185	6.74863	1.59704	5	8	somatic recombination of immunoglobulin genes involved in immune response	0.0102881	0.038955
GO:0002208	0.010185	6.74863	1.59704	5	8	somatic diversification of immunoglobulins involved in immune response	0.0102881	0.039534
GO:0002712	0.010185	6.74863	1.59704	5	8	regulation of B cell mediated immunity	0.0102881	0.0398431
GO:0002889	0.010185	6.74863	1.59704	5	8	regulation of immunoglobulin mediated immune response	0.0102881	0.0398431
GO:0016447	0.010185	6.74863	1.59704	5	8	somatic recombination of immunoglobulin gene segments	0.0102881	0.0402063
GO:0045190	0.010185	6.74863	1.59704	5	8	isotype switching	0.0102881	0.0411357
GO:0071478	0.010369	2.80226	5.39002	11	27	cellular response to radiation	0.0226337	0.0411357
GO:0006304	0.0105212	3.61216	3.39372	8	17	DNA modification	0.0164609	0.0411357
GO:0006513	0.0105212	3.61216	3.39372	8	17	protein monoubiquitination	0.0164609	0.0411357
GO:2001021	0.0105212	3.61216	3.39372	8	17	negative regulation of response to DNA damage stimulus	0.0164609	0.0412052
GO:0051253	0.0109191	1.50667	40.7246	54	204	negative regulation of RNA metabolic process	0.111111	0.0412052
GO:0006479	0.0111765	2.38357	7.58595	14	38	protein methylation	0.0288066	0.0431477
GO:0008213	0.0111765	2.38357	7.58595	14	38	protein alkylation	0.0288066	0.0431477
GO:0031396	0.0111765	2.38357	7.58595	14	38	regulation of protein ubiquitination	0.0288066	0.0431477
GO:0006303	0.0112402	4.05882	2.79482	7	14	double-strand break repair via nonhomologous end joining	0.0144033	0.0431477
GO:0010389	0.0112402	4.05882	2.79482	7	14	regulation of G2/M transition of mitotic cell cycle	0.0144033	0.0431477
GO:0048477	0.0112402	4.05882	2.79482	7	14	oogenesis	0.0144033	0.0431477
GO:0071479	0.0112402	4.05882	2.79482	7	14	cellular response to ionizing radiation	0.0144033	0.0431477
GO:0002562	0.0113472	4.86479	2.19593	6	11	somatic diversification of immune receptors via germline recombination within a single locus	0.0123457	0.0431477
GO:0016444	0.0113472	4.86479	2.19593	6	11	somatic cell DNA recombination	0.0123457	0.0431477
GO:0032481	0.0113472	4.86479	2.19593	6	11	positive regulation of type I interferon production	0.0123457	0.0431477
GO:0009893	0.0115951	1.31684	116.584	136	584	positive regulation of metabolic process	0.279835	0.0431477
GO:0032886	0.0115981	2.00213	12.1774	20	61	regulation of microtubule-based process	0.0411523	0.0431477
GO:0021543	0.0119657	2.57594	6.18854	12	31	pallium development	0.0246914	0.0431477
GO:0000082	0.0120205	2.27152	8.38447	15	42	G1/S transition of mitotic cell cycle	0.0308642	0.0431477
GO:0043484	0.0120205	2.27152	8.38447	15	42	regulation of RNA splicing	0.0308642	0.0431477
GO:0000226	0.0121707	1.59733	28.7468	40	144	microtubule cytoskeleton organization	0.0823045	0.0431477
GO:0033554	0.0125094	1.39802	63.4824	79	318	cellular response to stress	0.162551	0.0431477
GO:0048519	0.0149625	1.28047	152.118	172	762	negative regulation of biological process	0.353909	0.0431477
GO:0031327	0.0150217	1.4533	44.9168	58	225	negative regulation of cellular biosynthetic process	0.119342	0.0431477
GO:0071214	0.0151758	2.18911	8.5841	15	43	cellular response to abiotic stimulus	0.0308642	0.0431477
GO:0104004	0.0151758	2.18911	8.5841	15	43	cellular response to environmental stimulus	0.0308642	0.0431477
GO:0045944	0.0154418	1.47486	40.525	53	203	positive regulation of transcription by RNA polymerase II	0.109053	0.0431477
GO:0007127	0.0157064	3.24906	3.59335	8	18	meiosis I	0.0164609	0.0431477
GO:0016571	0.015781	2.44571	6.38817	12	32	histone methylation	0.0246914	0.0431477
GO:0071897	0.015781	2.44571	6.38817	12	32	DNA biosynthetic process	0.0246914	0.0431477
GO:0006376	0.0167053	8.08411	1.19778	4	6	mRNA splice site selection	0.00823045	0.0431477
GO:0016233	0.0167053	8.08411	1.19778	4	6	telomere capping	0.00823045	0.0431477
GO:0032727	0.0167053	8.08411	1.19778	4	6	positive regulation of interferon-alpha production	0.00823045	0.0431477
GO:0048207	0.0167053	8.08411	1.19778	4	6	vesicle targeting, rough ER to cis-Golgi	0.00823045	0.0431477
GO:0048208	0.0167053	8.08411	1.19778	4	6	COPII vesicle coating	0.00823045	0.0431477
GO:0062208	0.0167053	8.08411	1.19778	4	6	positive regulation of pattern recognition receptor signaling pathway	0.00823045	0.0431477
GO:0072527	0.0167053	8.08411	1.19778	4	6	pyrimidine-containing compound metabolic process	0.00823045	0.0431477
GO:1902455	0.0167053	8.08411	1.19778	4	6	negative regulation of stem cell population maintenance	0.00823045	0.0434638
GO:0030900	0.0168623	1.90675	12.5767	20	63	forebrain development	0.0411523	0.0434638
GO:0051173	0.0172749	1.31048	98.817	116	495	positive regulation of nitrogen compound metabolic process	0.238683	0.0434638
GO:0002377	0.0175257	3.54941	2.99445	7	15	immunoglobulin production	0.0144033	0.0435549
GO:0007017	0.0185814	1.46506	39.1275	51	196	microtubule-based process	0.104938	0.0435549
GO:0010604	0.0186696	1.29624	107.601	125	539	positive regulation of macromolecule metabolic process	0.257202	0.0435549
GO:0043086	0.0188799	1.74176	16.7689	25	84	negative regulation of catalytic activity	0.0514403	0.0435549
GO:0010558	0.0189132	1.43393	44.5176	57	223	negative regulation of macromolecule biosynthetic process	0.117284	0.0435549
GO:0044843	0.0189345	2.11238	8.78373	15	44	cell cycle G1/S phase transition	0.0308642	0.0435549
GO:0035825	0.0189348	4.05164	2.39556	6	12	homologous recombination	0.0123457	0.0435549
GO:0050864	0.0189348	4.05164	2.39556	6	12	regulation of B cell activation	0.0123457	0.0435549
GO:1901976	0.0189348	4.05164	2.39556	6	12	regulation of cell cycle checkpoint	0.0123457	0.0435549
GO:0051301	0.0191734	1.59593	24.3549	34	122	cell division	0.0699588	0.0435549
GO:0002312	0.0192014	5.05855	1.79667	5	9	B cell activation involved in immune response	0.0102881	0.0435549
GO:0008585	0.0192014	5.05855	1.79667	5	9	female gonad development	0.0102881	0.0435549
GO:0021955	0.0192014	5.05855	1.79667	5	9	central nervous system neuron axonogenesis	0.0102881	0.0435549
GO:0046545	0.0192014	5.05855	1.79667	5	9	development of primary female sexual characteristics	0.0102881	0.0435549
GO:0050871	0.0192014	5.05855	1.79667	5	9	positive regulation of B cell activation	0.0102881	0.0435549
GO:0070265	0.0192014	5.05855	1.79667	5	9	necrotic cell death	0.0102881	0.0435549
GO:0097300	0.0192014	5.05855	1.79667	5	9	programmed necrotic cell death	0.0102881	0.0436173
GO:0048285	0.0192303	1.7605	15.9704	24	80	organelle fission	0.0493827	0.0436173
GO:0007292	0.0193615	2.81342	4.39187	9	22	female gamete generation	0.0185185	0.0436173
GO:0031398	0.0193615	2.81342	4.39187	9	22	positive regulation of protein ubiquitination	0.0185185	0.0436173
GO:2000781	0.0193615	2.81342	4.39187	9	22	positive regulation of double-strand break repair	0.0185185	0.0436173
GO:1901990	0.0200664	1.93822	11.1793	18	56	regulation of mitotic cell cycle phase transition	0.037037	0.0436173
GO:0000278	0.0204666	1.49654	33.1386	44	166	mitotic cell cycle	0.090535	0.0436173
GO:0000122	0.0209674	1.54126	27.9482	38	140	negative regulation of transcription by RNA polymerase II	0.0781893	0.0436173
GO:0009890	0.0216372	1.41567	45.7153	58	229	negative regulation of biosynthetic process	0.119342	0.0436173
GO:0043583	0.0217473	2.20804	7.38632	13	37	ear development	0.026749	0.0436173
GO:0061982	0.0225148	2.95197	3.79298	8	19	meiosis I cell cycle process	0.0164609	0.0436173
GO:2001252	0.0225148	2.95197	3.79298	8	19	positive regulation of chromosome organization	0.0164609	0.0436173
GO:0050789	0.0230297	1.28046	302.64	320	1516	regulation of biological process	0.658436	0.0436173
GO:0050794	0.0234618	1.27011	290.262	308	1454	regulation of cellular process	0.633745	0.0436173
GO:0002520	0.0244369	2.35567	5.98891	11	30	immune system development	0.0226337	0.0436173
GO:0051302	0.0244369	2.35567	5.98891	11	30	regulation of cell division	0.0226337	0.0436173
GO:0065004	0.0244369	2.35567	5.98891	11	30	protein-DNA complex assembly	0.0226337	0.0436173
GO:0044249	0.0249113	1.24995	155.911	174	781	cellular biosynthetic process	0.358025	0.0436173
GO:0007346	0.0259236	1.69777	16.3697	24	82	regulation of mitotic cell cycle	0.0493827	0.0436173
GO:0006406	0.0259297	3.1532	3.19409	7	16	mRNA export from nucleus	0.0144033	0.0436173
GO:0032479	0.0259297	3.1532	3.19409	7	16	regulation of type I interferon production	0.0144033	0.0436173
GO:0032606	0.0259297	3.1532	3.19409	7	16	type I interferon production	0.0144033	0.0447608
GO:0051865	0.0259297	3.1532	3.19409	7	16	protein autoubiquitination	0.0144033	0.0450889
GO:1903046	0.0260721	2.22078	6.78743	12	34	meiotic cell cycle process	0.0246914	0.0453934
GO:0008038	0.0269343	12.1049	0.798521	3	4	neuron recognition	0.00617284	0.0453934
GO:0010225	0.0269343	12.1049	0.798521	3	4	response to UV-C	0.00617284	0.0453934
GO:0031954	0.0269343	12.1049	0.798521	3	4	positive regulation of protein autophosphorylation	0.00617284	0.0453934
GO:0046601	0.0269343	12.1049	0.798521	3	4	positive regulation of centriole replication	0.00617284	0.0453934
GO:0061511	0.0269343	12.1049	0.798521	3	4	centriole elongation	0.00617284	0.0453934
GO:0072520	0.0269343	12.1049	0.798521	3	4	seminiferous tubule development	0.00617284	0.0453934
GO:0072529	0.0269343	12.1049	0.798521	3	4	pyrimidine-containing compound catabolic process	0.00617284	0.0453934
GO:1902041	0.0269343	12.1049	0.798521	3	4	regulation of extrinsic apoptotic signaling pathway via death domain receptors	0.00617284	0.0460116
GO:1902751	0.0269343	12.1049	0.798521	3	4	positive regulation of cell cycle G2/M phase transition	0.00617284	0.0466307
GO:1903241	0.0269343	12.1049	0.798521	3	4	U2-type prespliceosome assembly	0.00617284	0.0470194
GO:1903722	0.0269343	12.1049	0.798521	3	4	regulation of centriole elongation	0.00617284	0.0470194
GO:1904353	0.0269343	12.1049	0.798521	3	4	regulation of telomere capping	0.00617284	0.0470194
GO:0010629	0.0289384	1.45876	32.939	43	165	negative regulation of gene expression	0.0884774	0.0470194
GO:0018022	0.0292187	2.39058	5.39002	10	27	peptidyl-lysine methylation	0.0205761	0.0470194
GO:0021987	0.0292187	2.39058	5.39002	10	27	cerebral cortex development	0.0205761	0.0470194
GO:0034968	0.0292187	2.39058	5.39002	10	27	histone lysine methylation	0.0205761	0.0470194
GO:0021954	0.0293673	3.47082	2.59519	6	13	central nervous system neuron development	0.0123457	0.0484735
GO:0034101	0.0293673	3.47082	2.59519	6	13	erythrocyte homeostasis	0.0123457	0.0484735
GO:0071168	0.0293673	3.47082	2.59519	6	13	protein localization to chromatin	0.0123457	0.0484735
GO:0002381	0.0322151	4.0445	1.9963	5	10	immunoglobulin production involved in immunoglobulin-mediated immune response	0.0102881	0.0484735
GO:0007131	0.0322151	4.0445	1.9963	5	10	reciprocal meiotic recombination	0.0102881	0.0484735
GO:0009994	0.0322151	4.0445	1.9963	5	10	oocyte differentiation	0.0102881	0.0484735
GO:0032206	0.0322151	4.0445	1.9963	5	10	positive regulation of telomere maintenance	0.0102881	0.0484735
GO:0048599	0.0322151	4.0445	1.9963	5	10	oocyte development	0.0102881	0.0484735
GO:0090224	0.0322151	4.0445	1.9963	5	10	regulation of spindle organization	0.0102881	0.0484735
GO:0140527	0.0322151	4.0445	1.9963	5	10	reciprocal homologous recombination	0.0102881	0.0484735
GO:1902116	0.0322151	4.0445	1.9963	5	10	negative regulation of organelle assembly	0.0102881
GO:0002637	0.0328945	5.38629	1.39741	4	7	regulation of immunoglobulin production	0.00823045
GO:0002639	0.0328945	5.38629	1.39741	4	7	positive regulation of immunoglobulin production	0.00823045
GO:0006298	0.0328945	5.38629	1.39741	4	7	mismatch repair	0.00823045
GO:0007140	0.0328945	5.38629	1.39741	4	7	male meiotic nuclear division	0.00823045
GO:0042220	0.0328945	5.38629	1.39741	4	7	response to cocaine	0.00823045
GO:0046677	0.0328945	5.38629	1.39741	4	7	response to antibiotic	0.00823045
GO:0048199	0.0328945	5.38629	1.39741	4	7	vesicle targeting, to, from or within Golgi	0.00823045
GO:2000737	0.0328945	5.38629	1.39741	4	7	negative regulation of stem cell differentiation	0.00823045
GO:2001224	0.0328945	5.38629	1.39741	4	7	positive regulation of neuron migration	0.00823045
GO:0016570	0.0341807	1.57507	20.1627	28	101	histone modification	0.0576132
GO:1903320	0.034248	1.96684	8.5841	14	43	regulation of protein modification by small protein conjugation or removal	0.0288066
GO:0008284	0.0344549	1.53589	22.7579	31	114	positive regulation of cell population proliferation	0.063786
GO:0000819	0.0344765	1.86484	10.1811	16	51	sister chromatid segregation	0.0329218
GO:1903322	0.0349559	2.43546	4.79113	9	24	positive regulation of protein modification by small protein conjugation or removal	0.0185185
GO:0009987	0.0358583	1.78398	412.835	420	2068	cellular process	0.864198
GO:2000278	0.0367156	2.83624	3.39372	7	17	regulation of DNA biosynthetic process	0.0144033
GO:0035264	0.0376228	2.25645	5.58965	10	28	multicellular organism growth	0.0205761
GO:0003006	0.0381386	1.48861	25.5527	34	128	developmental process involved in reproduction	0.0699588
GO:0001654	0.0381701	1.70307	13.5749	20	68	eye development	0.0411523
GO:0048880	0.0381701	1.70307	13.5749	20	68	sensory system development	0.0411523
GO:0150063	0.0381701	1.70307	13.5749	20	68	visual system development	0.0411523
GO:0080134	0.0383868	1.38145	40.7246	51	204	regulation of response to stress	0.104938
GO:0065007	0.0384656	1.25167	310.824	326	1557	biological regulation	0.670782
GO:0048592	0.039423	2.12883	6.38817	11	32	eye morphogenesis	0.0226337
GO:0000055	0.0397784	Inf	0.399261	2	2	ribosomal large subunit export from nucleus	0.00411523
GO:0000083	0.0397784	Inf	0.399261	2	2	regulation of transcription involved in G1/S transition of mitotic cell cycle	0.00411523
GO:0000729	0.0397784	Inf	0.399261	2	2	DNA double-strand break processing	0.00411523
GO:0006220	0.0397784	Inf	0.399261	2	2	pyrimidine nucleotide metabolic process	0.00411523
GO:0006369	0.0397784	Inf	0.399261	2	2	termination of RNA polymerase II transcription	0.00411523
GO:0006382	0.0397784	Inf	0.399261	2	2	adenosine to inosine editing	0.00411523
GO:0006882	0.0397784	Inf	0.399261	2	2	intracellular zinc ion homeostasis	0.00411523
GO:0007284	0.0397784	Inf	0.399261	2	2	spermatogonial cell division	0.00411523
GO:0030242	0.0397784	Inf	0.399261	2	2	autophagy of peroxisome	0.00411523
GO:0030318	0.0397784	Inf	0.399261	2	2	melanocyte differentiation	0.00411523
GO:0030502	0.0397784	Inf	0.399261	2	2	negative regulation of bone mineralization	0.00411523
GO:0031055	0.0397784	Inf	0.399261	2	2	chromatin remodeling at centromere	0.00411523
GO:0032350	0.0397784	Inf	0.399261	2	2	regulation of hormone metabolic process	0.00411523
GO:0034080	0.0397784	Inf	0.399261	2	2	CENP-A containing chromatin assembly	0.00411523
GO:0034086	0.0397784	Inf	0.399261	2	2	maintenance of sister chromatid cohesion	0.00411523
GO:0034088	0.0397784	Inf	0.399261	2	2	maintenance of mitotic sister chromatid cohesion	0.00411523
GO:0035455	0.0397784	Inf	0.399261	2	2	response to interferon-alpha	0.00411523
GO:0036309	0.0397784	Inf	0.399261	2	2	protein localization to M-band	0.00411523
GO:0045898	0.0397784	Inf	0.399261	2	2	regulation of RNA polymerase II transcription preinitiation complex assembly	0.00411523
GO:0046618	0.0397784	Inf	0.399261	2	2	xenobiotic export from cell	0.00411523
GO:0046885	0.0397784	Inf	0.399261	2	2	regulation of hormone biosynthetic process	0.00411523
GO:0048070	0.0397784	Inf	0.399261	2	2	regulation of developmental pigmentation	0.00411523
GO:0048087	0.0397784	Inf	0.399261	2	2	positive regulation of developmental pigmentation	0.00411523
GO:0048291	0.0397784	Inf	0.399261	2	2	isotype switching to IgG isotypes	0.00411523
GO:0048385	0.0397784	Inf	0.399261	2	2	regulation of retinoic acid receptor signaling pathway	0.00411523
GO:0048387	0.0397784	Inf	0.399261	2	2	negative regulation of retinoic acid receptor signaling pathway	0.00411523
GO:0048496	0.0397784	Inf	0.399261	2	2	maintenance of animal organ identity	0.00411523
GO:0050931	0.0397784	Inf	0.399261	2	2	pigment cell differentiation	0.00411523
GO:0055090	0.0397784	Inf	0.399261	2	2	acylglycerol homeostasis	0.00411523
GO:0060027	0.0397784	Inf	0.399261	2	2	convergent extension involved in gastrulation	0.00411523
GO:0060232	0.0397784	Inf	0.399261	2	2	delamination	0.00411523
GO:0061744	0.0397784	Inf	0.399261	2	2	motor behavior	0.00411523
GO:0065001	0.0397784	Inf	0.399261	2	2	specification of axis polarity	0.00411523
GO:0070328	0.0397784	Inf	0.399261	2	2	triglyceride homeostasis	0.00411523
GO:0070734	0.0397784	Inf	0.399261	2	2	histone H3-K27 methylation	0.00411523
GO:0070778	0.0397784	Inf	0.399261	2	2	L-aspartate transmembrane transport	0.00411523
GO:0071236	0.0397784	Inf	0.399261	2	2	cellular response to antibiotic	0.00411523
GO:0071474	0.0397784	Inf	0.399261	2	2	cellular hyperosmotic response	0.00411523
GO:0071787	0.0397784	Inf	0.399261	2	2	endoplasmic reticulum tubular network formation	0.00411523
GO:0071921	0.0397784	Inf	0.399261	2	2	cohesin loading	0.00411523
GO:0071932	0.0397784	Inf	0.399261	2	2	replication fork reversal	0.00411523
GO:0090030	0.0397784	Inf	0.399261	2	2	regulation of steroid hormone biosynthetic process	0.00411523
GO:0098696	0.0397784	Inf	0.399261	2	2	regulation of neurotransmitter receptor localization to postsynaptic specialization membrane	0.00411523
GO:0099633	0.0397784	Inf	0.399261	2	2	protein localization to postsynaptic specialization membrane	0.00411523
GO:0099645	0.0397784	Inf	0.399261	2	2	neurotransmitter receptor localization to postsynaptic specialization membrane	0.00411523
GO:0120305	0.0397784	Inf	0.399261	2	2	regulation of pigmentation	0.00411523
GO:1902969	0.0397784	Inf	0.399261	2	2	mitotic DNA replication	0.00411523
GO:1990961	0.0397784	Inf	0.399261	2	2	xenobiotic detoxification by transmembrane export across the plasma membrane	0.00411523
GO:2001028	0.0397784	Inf	0.399261	2	2	positive regulation of endothelial cell chemotaxis	0.00411523
GO:0051604	0.0411747	1.95925	7.98521	13	40	protein maturation	0.026749
GO:0098727	0.0411747	1.95925	7.98521	13	40	maintenance of cell number	0.026749
GO:0090596	0.0413046	1.85197	9.58226	15	48	sensory organ morphogenesis	0.0308642
GO:0040029	0.0413944	1.90016	8.78373	14	44	epigenetic regulation of gene expression	0.0288066
GO:0048562	0.0413944	1.90016	8.78373	14	44	embryonic organ morphogenesis	0.0288066
GO:0048568	0.0416734	1.6361	15.3715	22	77	embryonic organ development	0.0452675
GO:0006275	0.0418389	2.49492	4.19224	8	21	regulation of DNA replication	0.0164609
GO:0006405	0.0418389	2.49492	4.19224	8	21	RNA export from nucleus	0.0164609
GO:0002088	0.0429625	3.03521	2.79482	6	14	lens development in camera-type eye	0.0123457
GO:0044380	0.0429625	3.03521	2.79482	6	14	protein localization to cytoskeleton	0.0123457
GO:0070972	0.0429625	3.03521	2.79482	6	14	protein localization to endoplasmic reticulum	0.0123457
GO:0072698	0.0429625	3.03521	2.79482	6	14	protein localization to microtubule cytoskeleton	0.0123457
GO:0048522	0.044357	1.21273	164.096	180	822	positive regulation of cellular process	0.37037
GO:0031056	0.0453092	2.28191	4.99076	9	25	regulation of histone modification	0.0185185
GO:1901991	0.0453092	2.28191	4.99076	9	25	negative regulation of mitotic cell cycle phase transition	0.0185185
GO:1901576	0.0454502	1.21265	158.307	174	793	organic substance biosynthetic process	0.358025
GO:0009058	0.0458113	1.21162	160.303	176	803	biosynthetic process	0.36214
GO:0007423	0.0468002	1.54344	18.9649	26	95	sensory organ development	0.0534979
GO:0045814	0.0475609	2.13644	5.78928	10	29	negative regulation of gene expression, epigenetic	0.0205761
GO:0140013	0.0475609	2.13644	5.78928	10	29	meiotic nuclear division	0.0205761
GO:0048518	0.048491	1.20433	179.268	195	898	positive regulation of biological process	0.401235
GO:0042113	0.0489098	2.03088	6.5878	11	33	B cell activation	0.0226337
GO:0051168	0.0489098	2.03088	6.5878	11	33	nuclear export	0.0226337
GO:0042254	0.0495376	1.83778	8.98336	14	45	ribosome biogenesis	0.0288066
GO:0000070	0.0495846	1.95086	7.38632	12	37	mitotic sister chromatid segregation	0.0246914
GO:0006278	0.0496051	3.36846	2.19593	5	11	RNA-templated DNA biosynthetic process	0.0102881
GO:0006334	0.0496051	3.36846	2.19593	5	11	nucleosome assembly	0.0102881
GO:0007004	0.0496051	3.36846	2.19593	5	11	telomere maintenance via telomerase	0.0102881
GO:0007549	0.0496051	3.36846	2.19593	5	11	dosage compensation	0.0102881
GO:0033146	0.0496051	3.36846	2.19593	5	11	regulation of intracellular estrogen receptor signaling pathway	0.0102881
GO:0042100	0.0496051	3.36846	2.19593	5	11	B cell proliferation	0.0102881
GO:0042255	0.0496051	3.36846	2.19593	5	11	ribosome assembly	0.0102881
GO:1903432	0.0496051	3.36846	2.19593	5	11	regulation of TORC1 signaling	0.0102881
GO:1905168	0.0496051	3.36846	2.19593	5	11	positive regulation of double-strand break repair via homologous recombination	0.0102881
GO:2000736	0.0496051	3.36846	2.19593	5	11	regulation of stem cell differentiation	0.0102881
GO:0032446	0.0496327	1.43879	26.9501	35	135	protein modification by small protein conjugation	0.0720165

## Sheet: Figure3-FS1A
Gene Ontology Analysis of genes that showed RBMX binding sites (enrichGO)
ID	Description	GeneRatio	BgRatio	pvalue	p.adjust	qvalue	geneID	Count
GO:0045931	positive regulation of mitotic cell cycle	93/8285	112/14199	1.79253e-08	5.18576e-05	5.03173e-05	26073/996/55904/5048/8452/50484/29945/57504/5586/51433/990/25/8317/5641/328/5889/6198/1845/595/26271/64094/896/3280/3373/23276/1981/150465/51692/9525/6491/23326/9587/9787/3306/3169/8881/26057/891/4212/1019/4193/5962/29766/675/5925/8451/57521/23476/351/207/51514/1956/113130/1977/6868/55835/5578/9510/134353/286053/163786/8450/995/80174/6886/993/7015/219736/4824/6240/81620/4204/25942/983/5356/6241/2…	93
GO:0044770	cell cycle phase transition	339/8285	482/14199	2.12331e-08	5.18576e-05	5.03173e-05	996/5976/55904/26224/10083/10926/1407/51603/7756/54443/672/10460/637/4331/4361/6683/2273/8452/54888/54908/23026/7175/57646/50484/1112/29945/8454/57504/5218/5128/586/11178/6873/7158/815/9319/55743/23332/54962/51512/1739/79960/9984/8556/5933/10403/8555/5243/4998/9183/51720/6790/51433/7023/51776/79968/63967/8318/990/4436/51322/988/8317/84861/25793/8563/1033/328/128866/11040/5127/79791/2935/5934/4683…	339
GO:0051052	regulation of DNA metabolic process	309/8285	436/14199	2.64535e-08	5.18576e-05	5.03173e-05	5893/23028/5976/3980/10926/54799/672/2067/1663/3082/4361/11284/1161/5982/5888/10721/23201/23063/54929/2139/5588/6688/7158/64710/23293/54556/53615/7037/7515/2736/54962/60/4292/5063/51548/79960/57103/55063/9984/7520/55183/3320/55100/3776/79977/10269/546/4216/50507/51720/8550/2521/3183/990/4436/3326/23411/8317/5594/9837/79913/64863/23347/9767/143/4683/51366/5518/27000/51010/2625/80351/23560/9126/940…	309
GO:0007346	regulation of mitotic cell cycle	297/8285	421/14199	1.00537e-07	0.00014039	0.00013622	26073/996/55904/5048/728642/7756/54443/672/637/3479/4331/4361/2273/8452/54908/23026/9820/64848/7175/50484/1112/29945/2296/57504/55726/5586/8621/5774/9319/55743/54962/51512/284403/1739/79960/1906/7161/8556/5933/10403/8555/10269/4998/9183/51720/6790/51433/10296/7023/10795/51776/63967/990/4436/51322/23411/25/8317/84861/23331/25793/23170/5641/328/655/11040/55512/79791/5934/23087/7976/4683/51343/3209/…	297
GO:0006402	mRNA catabolic process	163/8285	217/14199	1.48418e-07	0.00014039	0.00013622	5976/7812/23034/7431/23644/9967/23369/54542/10758/8531/4904/1994/6093/23293/26986/23016/4292/57690/79670/22894/22803/2521/8761/27327/3183/26523/1153/4670/9567/23112/79882/328/2332/2935/50804/59284/56006/23658/51010/22849/23185/22794/1655/55110/4848/1432/83594/11044/57472/54464/8087/22916/9887/11340/2107/23435/27161/79072/23019/65109/192669/55795/79066/7538/51690/25804/23404/10247/9475/9698/192670…	163
GO:1903311	regulation of mRNA metabolic process	200/8285	273/14199	1.63214e-07	0.00014039	0.00013622	10181/5976/728642/7812/23034/7431/10659/79810/9967/23369/54542/10758/8531/6433/11338/4904/1994/6093/23210/26986/26528/23016/10179/4292/55796/6626/54715/57690/79670/22894/5978/2521/10914/8761/27327/3183/6732/1153/4670/10521/9567/23112/55147/79882/328/56853/2332/5935/9810/50804/59284/51010/22849/23185/22794/708/1655/6830/3312/27339/4928/4848/11052/8683/1432/6428/9444/11044/57472/83989/8087/22916/46…	200
GO:1901987	regulation of cell cycle phase transition	258/8285	362/14199	1.7112e-07	0.00014039	0.00013622	996/55904/10926/1407/51603/7756/54443/672/637/4331/4361/2273/8452/54888/54908/23026/7175/57646/50484/1112/29945/57504/7158/9319/55743/54962/51512/1739/79960/9984/8556/5933/10403/8555/4998/9183/51720/6790/51433/7023/51776/79968/63967/8318/990/4436/51322/988/8317/84861/25793/8563/328/79791/5934/4683/51343/2146/5889/80279/595/27339/55626/2735/8914/51147/26271/1432/896/7272/900/5810/5515/9555/3373/23…	258
GO:2000112	regulation of cellular macromolecule biosynthetic process	308/8285	440/14199	1.94857e-07	0.00014039	0.00013622	5976/7812/29954/57467/3479/23034/9821/7431/7175/89801/5610/23369/54542/8531/1975/4904/1994/10565/5315/54505/387/6093/26986/6949/10644/8672/5337/23016/4292/57690/1653/9933/9689/25929/2932/79670/22894/4528/27102/10959/8550/10985/16/27327/54517/26523/10580/1153/84271/23112/8846/26164/51654/56853/2332/5935/5611/2935/208/3718/136319/3315/8662/2645/2218/51010/22849/23185/9148/22794/6198/708/1982/1656/4…	308
GO:1901992	positive regulation of mitotic cell cycle phase transition	71/8285	84/14199	2.14847e-07	0.00014039	0.00013622	996/55904/8452/50484/29945/57504/51433/990/8317/328/5889/595/26271/896/3373/23276/1981/51692/9525/6491/9587/9787/3306/8881/26057/891/1019/4193/5962/29766/5925/8451/57521/23476/351/207/51514/1956/113130/6868/55835/9510/134353/286053/163786/8450/995/80174/993/7015/219736/6240/81620/4204/25942/983/5356/6241/27085/11065/84967/5890/7325/23236/8558/5087/51434/7027/255374/11331/1654	71
GO:0006302	double-strand break repair	193/8285	264/14199	3.44727e-07	0.000192398	0.000186683	5893/23028/3980/5980/25900/54799/5536/672/2067/1663/4361/11284/1161/5888/10721/54969/7158/64710/5423/54556/9319/7515/60/4175/4292/51548/55063/7520/1653/55183/55218/55100/79728/8438/51720/2521/8318/4436/8317/11144/4174/25939/79913/23347/5422/4683/51366/4173/6119/23064/5889/9400/7468/51111/27339/2305/10635/8914/51567/254394/4172/9025/11044/10902/10111/4968/6421/6118/55719/80314/54537/7291/78996/964…	193
GO:0044772	mitotic cell cycle phase transition	278/8285	395/14199	3.59866e-07	0.000192398	0.000186683	996/55904/26224/10083/10926/7756/54443/672/10460/637/4331/4361/6683/2273/8452/54908/23026/7175/50484/1112/29945/8454/57504/5218/5128/586/11178/6873/815/9319/55743/23332/51512/1739/79960/8556/5933/10403/8555/5243/4998/9183/51720/6790/51433/7023/63967/990/51322/8317/84861/25793/1033/328/128866/11040/5127/79791/2935/5934/4683/79935/51343/1021/2146/8453/219771/5889/6198/80279/595/55626/2305/7164/2627…	278
GO:2001020	regulation of response to DNA damage stimulus	177/8285	241/14199	6.27245e-07	0.000307402	0.000298272	5893/23028/1407/54799/672/2067/1663/637/960/9774/11284/1161/5888/10721/23201/54929/2139/7158/54556/7515/60/51548/57103/55063/9984/55183/10269/51720/2521/51776/79968/23411/25/8563/23347/5716/2332/51366/55702/6387/9400/1655/7468/51111/2305/10635/8914/51147/26271/9025/2070/10902/4968/8087/6787/6118/55719/80314/54537/7291/78996/9643/6615/56897/6659/7913/9521/5582/92797/8089/79000/25913/63979/7014/511…	177
GO:1901989	positive regulation of cell cycle phase transition	85/8285	105/14199	6.813e-07	0.00030821	0.000299055	996/55904/8452/50484/29945/57504/9984/51433/990/8317/8563/328/2146/5889/595/2735/26271/896/3373/23276/1981/51692/9525/6909/6491/9587/9787/3306/8881/26057/891/1019/4193/5962/29766/5925/8451/57521/23476/351/207/51514/8444/1956/113130/6868/55835/9510/134353/286053/163786/8450/995/80174/993/7015/219736/252983/6240/81620/4204/25942/983/7564/5356/6241/27085/11065/79915/4869/84967/5890/7325/23236/11200/…	85
GO:0006401	RNA catabolic process	189/8285	260/14199	8.76171e-07	0.000354462	0.000343933	5976/60528/7812/23034/7431/8635/55596/54888/23644/23517/9967/23369/54542/10758/8531/4904/1994/6093/23293/26986/23016/10179/4292/57690/79670/22894/22803/2521/8761/27327/3183/26523/1153/4670/9567/23112/23405/79882/328/2332/2935/50804/59284/56006/23658/51010/22849/23185/22794/1655/55110/4848/1432/83594/11044/57472/29102/54464/8087/22916/9887/5511/81892/55051/11340/2107/23435/51538/79002/27161/79072/…	189
GO:0090068	positive regulation of cell cycle process	154/8285	207/14199	9.04085e-07	0.000354462	0.000343933	26073/996/55904/10926/1663/3479/6683/8452/7175/50484/29945/57504/5586/387/10615/1906/9984/8556/10403/8555/546/6790/51433/51776/990/8317/5902/8563/328/9371/55512/79848/6795/3209/2146/2253/5889/595/2735/10635/26271/896/9555/7474/1894/3373/23276/1981/6421/9928/7320/51692/9525/55719/6909/6491/9587/5469/7517/55795/9787/3306/54617/8881/26057/84250/891/9475/1019/4193/1761/5962/51203/9493/9585/29766/1950…	154
GO:0006417	regulation of translation	259/8285	369/14199	1.27884e-06	0.000470054	0.000456092	5976/7812/23034/7431/7175/5610/23369/54542/8531/1975/4904/1994/5315/54505/387/6093/26986/6949/10644/8672/5337/23016/4292/57690/1653/9933/9689/25929/79670/22894/4528/27102/10959/8550/10985/16/27327/54517/26523/1153/84271/23112/8846/26164/51654/56853/2332/5935/5611/2935/208/136319/3315/8662/51010/22849/23185/9148/22794/6198/708/1982/1656/4848/2597/10767/9444/11044/23107/57472/80315/54464/8087/22916…	259
GO:0000819	sister chromatid segregation	142/8285	190/14199	1.53123e-06	0.000529717	0.000513982	996/9031/7756/9918/1663/10460/4361/8452/54908/7175/29945/23063/9319/8243/55743/10615/7155/27127/10403/10464/23047/25978/546/81929/51510/9183/51433/10726/24137/990/84861/128866/10735/10664/10270/6795/5518/9126/5889/3837/64151/26271/7272/11044/9555/10051/51652/6421/4751/25936/1063/10274/9928/10783/9525/55719/23397/80218/81930/23244/64105/9587/3834/7517/55795/9787/56984/54617/90417/151648/23383/8881…	142
GO:0071103	DNA conformation change	80/8285	99/14199	1.6651e-06	0.000544025	0.000527866	5976/1663/4331/4361/3149/5982/5888/10721/4175/7155/7520/1653/546/8438/8318/25/8940/4174/57680/9837/4683/4173/23064/56652/9400/5985/1108/254394/4172/10973/10111/84083/3181/84181/56897/92797/63922/7978/25913/7153/9557/6117/5983/84893/1660/83990/3159/1763/165545/10146/84296/3087/1105/6832/9401/164045/56916/2071/113510/5984/3148/7486/4176/54921/1107/55636/1106/8607/80205/64785/116447/5813/54821/57697…	80
GO:0000956	nuclear-transcribed mRNA catabolic process	93/8285	118/14199	2.0274e-06	0.000627535	0.000608895	5976/7812/23034/23644/9967/54542/4904/23293/26986/23016/4292/57690/79670/22894/22803/27327/26523/23112/2935/56006/51010/22849/22794/1655/55110/4848/11044/57472/54464/22916/9887/11340/2107/27161/23019/65109/55795/7538/51690/25804/23404/23318/9704/10492/1660/149041/6741/3184/246175/10140/9775/5433/129563/154197/472/25819/26019/51594/678/255967/53918/3192/23049/10642/7832/4116/167153/8559/55181/5436…	93
GO:1901990	regulation of mitotic cell cycle phase transition	199/8285	278/14199	2.67039e-06	0.000785228	0.000761905	996/55904/7756/54443/672/637/4331/4361/2273/8452/54908/23026/7175/50484/1112/29945/57504/9319/55743/51512/1739/79960/8556/5933/10403/8555/4998/9183/51720/6790/51433/7023/63967/990/51322/8317/84861/25793/328/79791/5934/4683/51343/2146/5889/80279/595/55626/26271/896/7272/900/5515/3373/23276/79858/1981/90/3398/60672/25949/1063/6118/9928/5311/51692/10783/9525/11319/6491/10385/9587/7517/55795/9787/330…	199
GO:0045787	positive regulation of cell cycle	202/8285	283/14199	3.09786e-06	0.000867549	0.00084178	26073/996/55904/10926/57787/5048/1663/3479/4331/6683/8452/64848/7175/50484/29945/57504/5586/2263/387/10615/1906/9984/8556/10403/8555/905/22924/546/6790/51433/8812/51776/7042/990/25/8317/5902/8563/5641/328/9371/5716/55512/79848/6795/3209/2146/2253/219771/5889/6198/6532/1845/595/2735/10635/26271/64094/896/9555/7474/3280/1894/3373/23276/1981/150465/6421/9928/5311/7320/51692/9525/55719/6909/6491/2332…	202
GO:0006260	DNA replication	194/8285	271/14199	3.53064e-06	0.000943803	0.000915769	5976/3980/10926/5980/1663/23649/4361/5981/259282/11284/50484/5982/5888/10721/23063/5424/64710/5423/2736/54962/4175/10714/79960/9984/55218/10269/546/4998/23594/11198/8318/990/8317/4174/5427/9837/25939/79913/64863/11201/5422/5931/9767/4683/4173/3978/5518/27000/6119/5425/56652/23560/9126/9400/7126/2735/8099/5985/8914/51147/254394/26271/4172/51053/5515/55704/4999/5000/6118/6418/23244/84083/51426/5930…	194
GO:2000113	negative regulation of cellular macromolecule biosynthetic process	139/8285	188/14199	5.38622e-06	0.00137723	0.00133633	5976/7812/57467/23034/7175/5610/54542/4904/6093/26986/10644/23016/4292/57690/2932/79670/22894/27102/27327/54517/26523/1153/23112/56853/2332/3718/51010/22849/1656/4848/2597/11044/1839/57472/80315/54464/8087/4691/3488/23178/9528/11340/51247/23435/27161/400961/23019/192669/79066/7538/468/440275/3609/23404/5914/55829/51763/85451/10247/1965/9475/9698/192670/23318/10492/4076/1660/149041/81618/9470/9445…	139
GO:0032392	DNA geometric change	74/8285	92/14199	5.67113e-06	0.00138966	0.00134839	5976/1663/4331/4361/3149/5982/5888/10721/4175/7520/1653/546/8438/8318/4174/57680/9837/4683/4173/23064/56652/9400/5985/1108/254394/4172/10973/10111/84083/3181/84181/56897/92797/63922/7978/25913/7153/9557/6117/5983/84893/1660/83990/3159/1763/165545/10146/84296/1105/6832/9401/164045/56916/2071/113510/5984/3148/7486/4176/54921/1107/55636/1106/8607/80205/64785/5813/54821/57697/2963/2547/25788/641/1654	74
GO:0061013	regulation of mRNA catabolic process	118/8285	157/14199	7.22862e-06	0.00165338	0.00160427	5976/7812/23034/7431/9967/23369/54542/10758/8531/4904/1994/6093/26986/23016/4292/57690/79670/22894/2521/8761/27327/3183/1153/4670/9567/23112/79882/328/2332/50804/59284/51010/22849/23185/22794/4848/1432/11044/57472/8087/11340/23435/27161/79072/23019/55795/79066/7538/23404/10247/9475/9698/23318/9704/10492/79899/6041/1660/149041/91875/87178/79675/3184/246175/79068/10140/9775/207/26135/5433/129563/15…	118
GO:0007059	chromosome segregation	225/8285	321/14199	7.30961e-06	0.00165338	0.00160427	996/9031/7756/9918/672/1663/10460/4361/55166/8452/54908/7175/29945/23369/4438/55706/23063/1459/56852/9319/8243/55743/79023/4292/10615/7155/27127/55063/10403/10464/23047/25978/546/81929/51510/9183/51433/10726/24137/990/6732/84861/8940/11144/1457/128866/10735/56271/80152/10664/7329/10270/6795/5518/9126/5889/3837/9400/64151/26271/7272/11044/2908/9555/10051/1894/79858/150465/10096/51652/6421/4751/259…	225
GO:0006282	regulation of DNA repair	111/8285	147/14199	9.2548e-06	0.00201583	0.00195596	5893/23028/54799/672/1663/11284/1161/5888/10721/23201/54929/2139/7158/54556/7515/60/51548/57103/55063/55183/51720/2521/23411/23347/51366/9400/7468/51111/2305/10635/8914/9025/2070/10902/4968/6118/55719/80314/54537/7291/78996/9643/56897/7913/5582/92797/8089/79000/25913/63979/7014/5111/84787/84250/56154/56907/84893/1660/26122/11143/10097/22891/83666/8451/23126/142/1956/6188/1111/5531/8091/9320/1054/…	111
GO:0032508	DNA duplex unwinding	69/8285	86/14199	1.38249e-05	0.00290373	0.00281748	5976/1663/4331/4361/5982/5888/10721/4175/7520/1653/546/8438/8318/4174/57680/9837/4683/4173/23064/56652/9400/5985/1108/254394/4172/10973/10111/84181/56897/92797/63922/25913/7153/9557/6117/5983/84893/1660/83990/3159/1763/165545/10146/84296/1105/6832/9401/164045/56916/2071/113510/5984/7486/4176/54921/1107/55636/1106/8607/80205/64785/5813/54821/57697/2963/2547/25788/641/1654	69
GO:0017148	negative regulation of translation	125/8285	169/14199	1.53007e-05	0.00310288	0.00301071	5976/7812/23034/7175/5610/54542/4904/6093/26986/10644/23016/4292/57690/79670/22894/27102/27327/54517/26523/1153/23112/56853/2332/51010/22849/1656/4848/2597/11044/57472/80315/54464/8087/4691/3488/11340/51247/23435/27161/400961/23019/192669/79066/7538/468/440275/3609/23404/5914/85451/10247/1965/9475/9698/192670/23318/10492/4076/1660/149041/9470/10643/3658/2058/87178/3184/246175/79068/10140/9775/288…	125
GO:0061014	positive regulation of mRNA catabolic process	73/8285	92/14199	1.63941e-05	0.00321379	0.00311833	5976/7812/23034/54542/4904/6093/26986/23016/4292/57690/79670/22894/27327/9567/23112/51010/22849/4848/11044/57472/11340/23435/27161/23019/79066/7538/23404/10247/9475/9698/23318/10492/79899/1660/149041/91875/87178/3184/246175/79068/10140/5433/129563/154197/10658/54915/25819/678/255967/3192/4343/10642/7832/56339/5436/10605/167227/201626/27257/340152/55095/399664/56478/677/253943/84069/51441/29883/26…	73
GO:0098813	nuclear chromosome segregation	186/8285	263/14199	1.88815e-05	0.003582	0.0034756	996/9031/7756/9918/1663/10460/4361/55166/8452/54908/7175/29945/4438/55706/23063/9319/8243/55743/4292/10615/7155/27127/55063/10403/10464/23047/25978/546/81929/51510/9183/51433/10726/24137/990/84861/11144/128866/10735/10664/10270/6795/5518/9126/5889/3837/64151/26271/7272/11044/9555/10051/1894/150465/10096/51652/6421/4751/25936/1063/10274/9928/7320/10783/9525/27030/55719/23397/80218/81930/23244/6410…	186
GO:0061157	mRNA destabilization	70/8285	88/14199	2.08763e-05	0.00383666	0.0037227	5976/7812/23034/54542/4904/6093/26986/23016/4292/57690/79670/22894/27327/23112/51010/22849/4848/11044/57472/11340/23435/27161/23019/79066/7538/23404/10247/9475/9698/23318/10492/1660/149041/87178/3184/246175/79068/10140/5433/129563/154197/10658/54915/25819/678/255967/3192/4343/10642/7832/56339/5436/10605/167227/201626/27257/340152/55095/399664/56478/677/253943/84069/51441/29883/26058/131405/197135…	70
GO:0006261	DNA-templated DNA replication	115/8285	155/14199	2.61739e-05	0.00466451	0.00452596	5976/3980/10926/5980/1663/23649/4361/5981/259282/11284/50484/5982/5888/10721/5424/64710/5423/54962/4175/10714/9984/55218/10269/546/4998/23594/8318/990/8317/4174/5427/9837/25939/64863/5422/4683/4173/3978/5425/56652/9400/8099/5985/8914/254394/26271/4172/51053/4999/5000/84083/56897/92667/92797/63922/54617/84268/6117/7014/5111/5983/84893/6733/23595/11143/3159/22891/1763/55345/675/5428/90381/54465/555…	115
GO:0000082	G1/S transition of mitotic cell cycle	136/8285	187/14199	2.78641e-05	0.00481966	0.00467651	55904/10926/637/4331/2273/8452/23026/8454/5218/5128/586/815/51512/1739/79960/5933/990/51322/8317/25793/1033/328/11040/5127/79791/2935/5934/1021/2146/8453/6198/595/55626/1871/896/5515/3373/1981/90/3398/6118/9928/5311/51692/2103/10657/11319/6491/10385/54617/9113/10197/57663/26057/4678/902/324/1019/91/4193/57695/55198/10457/9314/4609/6194/81853/5962/65061/5925/8451/7157/57521/23476/207/58190/6502/19…	136
GO:0044839	cell cycle G2/M phase transition	110/8285	148/14199	3.41903e-05	0.00574495	0.00557431	26224/10083/672/4361/2273/50484/1112/57504/5218/6873/55743/10403/8555/5243/4998/51720/6790/63967/990/8317/4683/10270/51343/219771/5889/80279/595/2305/51147/7164/26271/900/9555/60672/25949/1063/9928/9525/2103/84930/10657/3306/9088/10776/9113/27183/891/51347/1019/55336/79621/27133/90381/7157/23476/351/2029/51514/8444/890/6502/64839/85417/472/1111/8091/571/22976/9133/9577/995/29980/808/80174/84142/1…	110
GO:0000724	double-strand break repair via homologous recombination	115/8285	156/14199	4.25623e-05	0.00695303	0.0067465	5893/23028/3980/5980/54799/672/4361/5888/10721/7158/64710/54556/7515/60/4175/51548/55183/55218/79728/8438/2521/8318/8317/11144/4174/25939/23347/4683/4173/6119/5889/9400/10635/8914/254394/4172/10902/6421/6118/80314/54537/9643/7517/92797/8089/79000/54617/6117/63979/56154/84893/51444/2073/26122/10097/22891/675/23126/142/253714/84296/472/1111/5531/64210/119392/286053/9401/79677/113510/151987/64769/25…	115
GO:0050779	RNA destabilization	72/8285	92/14199	4.44865e-05	0.00700176	0.00679379	5976/7812/23034/54542/4904/6093/26986/23016/4292/57690/79670/22894/27327/23112/51010/22849/4848/11044/57472/11340/23435/27161/23019/79066/7538/23404/10247/9475/9698/23318/10492/1660/149041/87178/3184/246175/79068/10140/5433/129563/154197/10658/54915/25819/678/255967/3192/4343/124245/10642/7832/56339/5436/10605/167227/201626/27257/340152/55095/399664/56478/677/253943/84069/389421/51441/29883/26058…	72
GO:0006310	DNA recombination	203/8285	292/14199	4.52418e-05	0.00700176	0.00679379	5893/23028/3980/5980/54799/672/2067/4361/23304/3149/5888/10721/4438/7158/64710/5423/54556/9319/6929/7037/7515/60/4175/4292/7155/51548/55063/9984/7520/55183/6932/55218/79728/8438/2521/8318/4436/8317/11144/4174/328/25939/79913/23347/4683/4173/6119/23064/51010/5889/9400/6830/7468/51111/10635/8914/254394/4172/9025/10902/4437/10111/3836/2956/6421/7292/6118/7320/27030/80314/84057/84083/54537/78996/9643…	203
GO:0000725	recombinational repair	116/8285	158/14199	5.34861e-05	0.00791903	0.00768381	5893/23028/3980/5980/54799/672/4361/5888/10721/7158/64710/54556/7515/60/4175/51548/55183/55218/79728/8438/2521/8318/8317/11144/4174/25939/23347/4683/4173/6119/5889/9400/10635/8914/254394/4172/10902/6421/6118/80314/54537/9643/78995/7517/92797/8089/79000/54617/6117/63979/56154/84893/51444/2073/26122/10097/22891/675/23126/142/253714/84296/472/1111/5531/64210/119392/286053/9401/79677/113510/151987/64…	116
GO:0070828	heterochromatin organization	58/8285	72/14199	5.38618e-05	0.00791903	0.00768381	23028/22955/23304/7175/53615/11176/51548/55183/2122/23411/23347/10664/8312/2146/2145/83989/3065/1788/3070/5290/11335/57169/6615/50809/1786/23378/3021/22880/4017/51535/83852/80312/5925/22893/63976/9869/80854/8091/1487/23272/201161/80063/8085/4204/25942/8493/55729/23133/55196/57673/353274/26013/3005/54737/3066/5253/9646/84456	58
GO:0034248	regulation of cellular amide metabolic process	284/8285	421/14199	6.02157e-05	0.00863728	0.00838072	5976/7812/3479/23034/7431/7175/5610/23369/54542/8531/1975/4904/1994/5315/54505/387/6093/5165/26986/6949/10644/8301/8672/5337/23016/4292/57103/57690/1653/9933/9689/25929/79670/22894/4528/27102/10959/8550/10985/16/27327/54517/26523/1153/84271/23112/8846/26164/51654/56853/2332/5935/5611/2935/208/136319/3315/8662/51010/22849/23185/9148/22794/6198/708/1982/1656/4848/2597/10767/9444/11044/23107/57472/8…	284
GO:0000070	mitotic sister chromatid segregation	121/8285	166/14199	6.40624e-05	0.00897026	0.00870381	996/9031/7756/9918/10460/8452/54908/7175/29945/9319/8243/10615/27127/10403/10464/23047/25978/546/81929/51510/9183/51433/10726/24137/990/84861/128866/10270/6795/5518/9126/3837/64151/26271/7272/11044/9555/10051/51652/4751/25936/1063/9928/10783/9525/55719/23397/80218/81930/23244/64105/9587/3834/7517/55795/9787/56984/54617/90417/151648/23383/8881/27243/5901/27183/84250/891/55143/324/10592/55755/51203…	121
GO:0022604	regulation of cell morphogenesis	193/8285	278/14199	7.82462e-05	0.0107015	0.0103837	1856/51265/5048/6792/9043/23221/2534/54764/51177/960/27067/9820/23327/816/4649/387/6857/9948/55679/9886/2011/10979/9175/6480/1739/55843/5362/5063/2192/55604/22999/23136/10269/57091/9962/7430/25805/25/8829/54873/1399/11078/4627/1690/3055/2245/8874/79791/51760/23370/84079/79784/59284/23189/7016/1855/23268/708/152503/4192/23603/23316/8437/7422/55171/7474/5361/10675/2335/390/2043/335/103910/9270/5333…	193
GO:0043488	regulation of mRNA stability	106/8285	144/14199	9.25641e-05	0.012372	0.0120045	5976/7812/23034/7431/9967/23369/54542/10758/8531/4904/1994/6093/26986/23016/4292/57690/79670/22894/2521/8761/27327/3183/1153/4670/23112/79882/328/2332/50804/59284/51010/22849/23185/4848/1432/11044/57472/8087/11340/23435/27161/79072/23019/55795/79066/7538/23404/10247/9475/9698/23318/10492/6041/1660/149041/87178/79675/3184/246175/79068/10140/207/26135/5433/129563/154197/10658/54915/25819/678/255967…	106
GO:1900087	positive regulation of G1/S transition of mitotic cell cycle	34/8285	39/14199	9.71418e-05	0.0126954	0.0123183	55904/990/328/595/896/3373/1981/51692/6491/26057/4193/5962/8451/57521/207/1956/6868/55835/9510/134353/163786/8450/7015/6240/5356/6241/27085/84967/7325/23236/8558/7027/255374/1654	34
GO:0044843	cell cycle G1/S phase transition	150/8285	212/14199	0.000113029	0.01416	0.0137394	55904/10926/51603/637/4331/2273/8452/23026/8454/5218/5128/586/815/51512/1739/79960/5933/990/51322/8317/25793/1033/328/11040/5127/79791/2935/5934/1021/2146/8453/6198/595/55626/2735/1871/896/5515/3373/1981/90/3398/6118/9928/5311/51692/2103/6909/10657/11319/6491/10385/54617/9113/10197/57663/26057/4678/902/324/1019/91/4193/57695/55198/10457/9314/4609/6194/81853/5962/65061/5925/8451/7157/57521/23476/2…	150
GO:0045814	negative regulation of gene expression, epigenetic	58/8285	73/14199	0.000113164	0.01416	0.0137394	23028/22955/23304/7175/6688/53615/11176/51548/55183/23411/55506/23347/10664/8312/2146/9355/2145/83989/9555/3065/1788/3070/80314/5290/11335/57169/1786/23378/3021/22880/51535/83852/58487/80312/5925/22893/9869/8091/1487/23272/201161/80063/8085/648/4204/25942/8493/55729/23133/55196/57673/353274/26013/3005/54737/5253/9646/84456	58
GO:0002181	cytoplasmic translation	105/8285	143/14199	0.000118058	0.0144646	0.014035	6224/7812/51121/8531/1975/6141/55854/4904/5315/54505/26986/8891/6160/6193/8668/6128/6175/16/2332/6217/6223/6142/8661/22849/6158/6143/6164/6207/51389/80315/6152/1981/6209/51611/2107/6125/6204/9349/8894/25873/1968/6155/85451/89978/6210/10492/1660/11224/6194/6176/6229/3184/6205/6135/1939/6233/6161/6167/6129/92715/10480/6188/3192/285381/6156/1974/4690/10642/1973/6159/6133/7884/6208/9147/56339/6157/61…	105
GO:0000086	G2/M transition of mitotic cell cycle	99/8285	134/14199	0.000123297	0.0147981	0.0143586	26224/10083/672/4361/2273/50484/1112/57504/5218/6873/55743/8555/5243/4998/51720/6790/63967/990/8317/4683/51343/219771/5889/80279/595/2305/7164/26271/900/60672/25949/1063/9928/9525/2103/84930/10657/3306/9088/10776/9113/27183/891/51347/1019/55336/79621/27133/90381/23476/351/2029/51514/890/6502/64839/85417/472/1111/8091/571/9577/995/29980/808/80174/84142/11073/993/5885/9833/219736/7465/5347/6240/420…	99
GO:0006997	nucleus organization	95/8285	128/14199	0.000125853	0.0148028	0.0143631	5048/1663/6683/7175/57602/55706/28996/55746/11176/25978/10269/81929/51510/6732/23411/25777/7443/128866/2010/7329/6223/4928/57097/57122/9025/4001/9631/57142/55818/51652/7341/10783/9525/23435/9972/84172/10436/5819/27243/22927/23345/23378/3021/27183/10208/23175/2113/51280/6733/27348/1861/53371/50511/26135/26092/8444/7110/1111/25909/5578/23165/2334/221496/129401/90780/6314/3148/23353/221035/9221/5579…	95
GO:0034249	negative regulation of cellular amide metabolic process	136/8285	191/14199	0.000145799	0.0168126	0.0163132	5976/7812/3479/23034/7175/5610/54542/4904/6093/26986/10644/23016/4292/57690/79670/22894/27102/27327/54517/26523/1153/23112/56853/2332/51010/22849/1656/4848/2597/11044/57472/80315/54464/8087/4691/57142/3488/11340/51247/23435/27161/400961/23019/23163/6253/192669/79066/7538/468/440275/3609/23404/5914/85451/10247/10313/1965/9475/9698/192670/23318/10492/4076/1660/149041/9470/10643/3658/2058/6653/87178…	136
GO:0048285	organelle fission	303/8285	455/14199	0.000149786	0.0169403	0.0164371	56603/26073/996/5898/1352/9031/7756/9918/54443/1634/10460/3479/10928/4361/6683/23304/8452/54908/9820/7175/5888/29945/4438/55706/8621/259266/9650/387/55737/6196/9319/8243/55743/23332/4292/10615/7155/27127/1906/55063/8556/10403/8555/10464/23047/25978/546/81929/23259/8438/51510/9183/10059/6790/22974/51433/10726/24137/990/5902/84861/11144/80821/4605/655/9371/128866/55125/10735/55512/7329/54332/10270/…	303
GO:0043487	regulation of RNA stability	113/8285	156/14199	0.000169662	0.018826	0.0182668	5976/7812/23034/7431/54888/9967/23369/54542/10758/8531/4904/1994/6093/26986/23016/4292/57690/79670/22894/2521/8761/27327/3183/1153/4670/23112/79882/328/2332/50804/59284/51010/22849/23185/4848/1432/11044/57472/8087/11340/23435/51538/27161/79072/23019/55795/79066/7538/23404/1736/10247/9475/9698/23318/10492/6041/1660/149041/87178/79675/3184/246175/79068/10140/207/26135/5433/129563/154197/10658/54915…	113
GO:0000280	nuclear division	275/8285	411/14199	0.000184535	0.0200973	0.0195003	56603/26073/996/9031/7756/9918/54443/10460/3479/4361/6683/23304/8452/54908/9820/7175/5888/29945/4438/55706/8621/259266/387/6196/9319/8243/55743/23332/4292/10615/7155/27127/1906/55063/8556/10403/8555/10464/23047/25978/546/81929/8438/51510/9183/6790/22974/51433/10726/24137/990/5902/84861/11144/4605/655/9371/128866/55125/10735/55512/7329/10270/6795/51343/5518/3209/2253/56647/9126/5889/3837/64151/106…	275
GO:0006397	mRNA processing	305/8285	460/14199	0.000227749	0.0243526	0.0236292	10181/23028/10180/6936/55692/728642/9716/11171/55596/23517/10659/79810/9967/6433/11338/10147/8621/4904/1659/27238/23210/26986/26528/9130/1207/55421/10179/55094/55796/6626/54715/9984/1653/25929/10450/5978/51729/55696/51593/10992/22803/55285/10914/54439/3183/8487/55280/6732/988/3189/1153/4670/10521/8563/84844/55147/6430/79882/22985/8106/5411/1477/24148/51340/58490/56853/2332/27336/5935/9810/8175/55…	305
GO:1902808	positive regulation of cell cycle G1/S phase transition	42/8285	51/14199	0.00023235	0.0244009	0.0236761	55904/990/328/2146/595/2735/896/3373/1981/51692/6909/6491/26057/4193/5962/8451/57521/207/1956/6868/55835/9510/134353/163786/8450/7015/252983/6240/5356/6241/27085/84967/7325/23236/8558/5336/65992/7027/255374/11331/1654/79447	42
GO:0031507	heterochromatin assembly	51/8285	64/14199	0.000255038	0.0263137	0.0255321	23028/22955/23304/7175/53615/11176/51548/55183/23411/23347/10664/8312/2146/2145/83989/3065/1788/3070/5290/11335/57169/1786/23378/3021/22880/51535/83852/80312/5925/22893/9869/8091/1487/23272/201161/80063/8085/4204/25942/8493/55729/23133/55196/57673/353274/26013/3005/54737/5253/9646/84456	51
GO:0034655	nucleobase-containing compound catabolic process	250/8285	373/14199	0.000302626	0.0306576	0.029747	22875/23098/5976/60528/7812/23034/51071/7431/8635/55596/54888/23644/23517/9967/954/23369/54542/10758/8531/4904/1994/6093/23293/26986/5151/38/23016/10179/4292/22978/57690/79670/22894/22803/2521/8761/27327/3183/26523/11332/1153/4670/27443/51733/9567/23112/23405/79882/328/25939/2332/23417/2935/50804/59284/1777/56006/4521/23658/51010/22849/23185/22794/1655/55110/4848/1432/10846/10591/83594/11044/8622…	250
GO:0033044	regulation of chromosome organization	145/8285	207/14199	0.000307567	0.0306576	0.029747	996/5976/9031/7756/9918/2067/1663/10460/4331/4361/8452/11284/54908/7175/29945/23063/5588/23293/9319/55743/7515/51548/7520/10403/546/4216/9183/8550/51433/3183/990/84861/5594/79913/10664/4683/80351/64151/26271/26054/7272/10111/9555/10051/54464/10575/6421/4751/1063/10783/56252/55719/6950/23397/3181/9587/7517/55795/9787/25913/56984/54617/54552/8881/1786/1736/7153/3021/7014/84250/22880/891/51535/324/5…	145
GO:0006284	base-excision repair	36/8285	43/14199	0.000347629	0.0340734	0.0330613	3980/11284/10721/23201/5424/5423/7515/51548/10075/328/3978/6119/55247/4968/54936/6118/23583/8930/10038/6117/5111/2073/1763/6996/79661/5428/6188/8091/252969/7486/27343/2237/55031/5426/2074/8505	36
GO:0140014	mitotic nuclear division	191/8285	280/14199	0.000382668	0.0368929	0.0357971	26073/996/9031/7756/9918/54443/10460/3479/6683/8452/54908/9820/7175/29945/8621/387/9319/8243/23332/10615/27127/1906/8556/10403/8555/10464/23047/25978/546/81929/51510/9183/6790/22974/51433/10726/24137/990/5902/84861/4605/655/9371/128866/55125/10735/55512/7329/10270/6795/5518/3209/2253/56647/9126/3837/64151/26271/23113/7272/11044/9555/10051/6152/51652/4751/25936/1063/10274/9928/10783/9525/55719/233…	191
GO:0051053	negative regulation of DNA metabolic process	94/8285	129/14199	0.000413581	0.0392301	0.0380649	3980/2067/10721/23063/7158/23293/7515/54962/4292/9984/7520/55183/3776/3183/990/4436/23347/4683/51366/27000/2625/80351/23560/9400/8914/26271/51053/4437/10923/10111/4968/54464/2956/4297/23244/84083/54537/7291/78996/92797/79000/25913/54552/80762/7014/84893/55226/3178/675/146059/7157/142/7013/6188/472/1111/8091/3192/9320/29980/1676/6282/4880/115004/254225/54386/7644/81620/3008/5394/167227/80311/545/2…	94
GO:0044782	cilium organization	244/8285	365/14199	0.000450818	0.0420835	0.0408335	57787/6792/23386/25937/8100/1767/8481/84062/4134/57545/10198/55761/23224/2665/9474/57560/10640/29105/80216/1183/7419/5108/8556/11158/5991/8555/2932/10464/29887/5990/8655/27285/80173/3983/9342/11020/8814/51382/9786/51098/9371/22919/23059/23322/9738/30844/6674/147700/81492/93233/79846/79989/95681/7016/8729/9148/90410/79864/22897/57562/5992/4117/22858/51715/8382/79770/84100/27031/80321/55081/152015/…	244
GO:0060271	cilium assembly	227/8285	338/14199	0.000471093	0.0432891	0.0420032	57787/6792/23386/25937/8100/1767/8481/84062/4134/57545/10198/23224/2665/9474/57560/10640/29105/80216/1183/7419/5108/8556/11158/5991/8555/2932/10464/29887/5990/8655/27285/80173/3983/9342/8814/51382/9786/51098/9371/22919/23059/23322/9738/30844/6674/147700/81492/93233/79846/79989/95681/7016/8729/9148/90410/79864/22897/57562/5992/4117/22858/51715/8382/79770/84100/27031/80321/55081/10096/55704/6738/11…	227
GO:0051054	positive regulation of DNA metabolic process	172/8285	251/14199	0.000519328	0.0463313	0.0449551	10926/54799/672/2067/1663/3082/4361/11284/5982/5888/23201/54929/2139/5588/7158/54556/7037/7515/2736/60/4292/5063/51548/57103/55063/7520/55183/3320/79977/546/4216/50507/51720/8550/2521/4436/3326/23411/8317/5594/9837/23347/4683/51010/80351/7126/7468/51111/10728/2735/2305/10635/5985/8914/9025/2070/64094/10902/10111/10575/7292/4751/7320/55719/6950/80314/54537/3181/466/9643/8239/5582/8089/63922/25913/…	172
GO:0071897	DNA biosynthetic process	128/8285	182/14199	0.0005205	0.0463313	0.0449551	26073/3980/5980/83932/3082/4361/5981/11284/5982/10721/5424/5588/23293/5423/5063/10714/79960/7520/3320/3776/79977/4216/50507/8550/3183/3326/23411/5594/5427/9894/9837/11201/5422/9767/143/55512/9100/3978/27000/5425/80351/54433/10728/5985/51147/64094/4015/10111/54464/10575/4751/1063/6950/51426/3181/56897/78995/63922/25913/54552/1736/6117/7014/5111/5983/55226/3178/10574/51455/11143/9314/4609/1545/3184…	128
GO:0006287	base-excision repair, gap-filling	14/8285	14/14199	0.000527835	0.0463313	0.0449551	3980/11284/5424/5423/328/3978/54936/5111/79661/5428/27343/2237/5426/8505	14
GO:0000723	telomere maintenance	94/8285	130/14199	0.000641396	0.0554713	0.0538236	5976/2067/4361/5981/11284/5888/5588/23293/7515/51548/7520/55183/3320/546/4216/8550/3183/3326/5594/9894/328/4683/6119/80351/5889/54433/10728/10111/54464/10575/4751/6118/56252/6950/3181/7517/25913/54552/1736/6117/7014/5111/55226/3178/10574/4609/22891/1763/3184/675/142/51002/55869/79618/7013/85456/472/22948/140609/152485/26272/64421/3192/10694/286053/23049/9401/79677/7203/7015/7486/10576/54386/1499/…	94
GO:0010948	negative regulation of cell cycle process	179/8285	263/14199	0.000681212	0.058061	0.0563364	1407/9031/51603/7756/672/4361/2273/54888/54908/23026/7175/57646/1112/23063/7158/6196/9319/55743/54962/51512/1739/79960/9984/5933/10403/8555/546/4998/9183/51720/51776/79968/63967/8318/990/4436/51322/988/84861/25793/8563/655/79791/5934/9738/4683/51343/2146/4591/80279/2648/595/27339/56890/8914/26271/1432/7272/900/5810/9555/8850/79858/90/26270/60672/25949/4751/1063/6118/5311/10385/9587/3834/7517/5579…	179
GO:1901988	negative regulation of cell cycle phase transition	153/8285	222/14199	0.000695241	0.0584102	0.0566752	1407/51603/7756/672/4361/2273/54888/54908/23026/7175/57646/1112/7158/9319/55743/54962/51512/1739/79960/9984/5933/10403/8555/4998/9183/51720/51776/79968/63967/8318/990/4436/51322/988/84861/25793/8563/79791/5934/4683/51343/2146/80279/595/27339/8914/26271/1432/7272/900/5810/9555/79858/90/26270/60672/25949/1063/6118/5311/10385/9587/7517/55795/56984/440275/65975/27183/891/9575/324/51347/4193/79621/104…	153
GO:0042770	signal transduction in response to DNA damage	119/8285	169/14199	0.00074756	0.0619212	0.0600819	23028/1407/672/637/4361/960/57646/1112/28996/7158/27330/54962/51512/9984/8555/10269/546/51720/7023/51776/79968/63967/4436/51322/988/23411/25/8563/5716/9100/79791/4683/10397/55702/51343/80279/1655/595/27339/2305/51147/1432/900/5810/79858/26270/25949/6118/2309/7291/6615/6659/9521/440275/65975/9575/51347/4193/79621/83990/64844/675/8451/90381/8533/7157/5366/261726/51514/8444/25896/56950/54465/2177/47…	119
GO:0007062	sister chromatid cohesion	43/8285	54/14199	0.0008008	0.0654098	0.0634669	1663/4361/23063/8243/27127/23047/546/10735/10664/5518/9126/5889/11044/9555/6421/10274/55719/80218/23244/151648/23383/84250/5925/114799/23126/91272/113130/55869/286053/701/151246/25836/5885/5347/1499/2237/8313/54921/699/157570/79892/23137/11331	43
GO:0040029	regulation of gene expression, epigenetic	91/8285	126/14199	0.000828541	0.0665385	0.0645621	23028/5976/3720/22955/672/23304/5926/7175/57492/51742/6602/6688/9759/53615/11176/51548/55183/23411/55506/2033/23347/10664/8312/2146/9355/2145/83989/9555/8850/3065/11240/8289/1788/3070/80314/5290/55791/11335/57169/1786/51132/23378/3021/54496/22880/51535/83852/58487/80312/6996/5925/22893/9869/63978/1111/8091/9425/3192/1487/64783/8545/23272/56339/201161/80063/8085/648/55159/4204/25942/8493/55729/539…	91
GO:1902751	positive regulation of cell cycle G2/M phase transition	26/8285	30/14199	0.000837246	0.0665385	0.0645621	50484/57504/8317/5889/595/26271/9525/3306/891/1019/23476/351/51514/8444/995/80174/993/219736/6240/4204/25942/983/79915/4869/5890/5087	26
GO:1903313	positive regulation of mRNA metabolic process	87/8285	120/14199	0.000875279	0.0686336	0.0665949	5976/7812/23034/9967/54542/4904/6093/26986/26528/23016/4292/57690/79670/22894/27327/1153/9567/23112/56853/5935/51010/22849/3312/27339/4928/4848/11044/57472/22916/4691/11340/23435/27161/23019/79066/7538/23404/10247/9475/9698/23318/10492/79899/1660/149041/91875/6434/87178/3184/246175/79068/10140/5433/129563/154197/10658/54915/25819/678/255967/3192/4343/10642/7832/29896/56339/123169/11051/5436/10605…	87
GO:0060213	positive regulation of nuclear-transcribed mRNA poly(A) tail shortening	13/8285	13/14199	0.000905206	0.0691886	0.0671335	26986/57690/27327/23112/22849/27161/23019/7538/10140/7832/5436/56478/29883	13
GO:0007091	metaphase/anaphase transition of mitotic cell cycle	47/8285	60/14199	0.000905888	0.0691886	0.0671335	996/7756/10460/8452/54908/7175/29945/9319/10403/9183/51433/990/84861/26271/7272/1063/10783/9587/7517/55795/9787/56984/8881/891/324/55755/57520/1062/5925/51143/472/64682/9184/286053/701/4085/5885/5347/81620/699/55055/11065/348654/9212/9735/51434/51451	47
GO:0050684	regulation of mRNA processing	96/8285	134/14199	0.00094461	0.0712211	0.0691057	10181/728642/10659/79810/9967/6433/11338/23210/26528/10179/55796/6626/54715/5978/10914/6732/1153/10521/55147/79882/56853/2332/5935/9810/22849/708/1655/6830/3312/27339/4928/11052/8683/6428/9444/83989/8087/22916/4691/6432/6429/58517/10657/3181/79171/84081/79066/9667/9584/10656/10250/6733/84872/3178/1660/6434/79811/580/10150/4857/60677/10658/79869/10284/4154/3192/135295/56254/1859/6651/6294/4116/552…	96
GO:1902749	regulation of cell cycle G2/M phase transition	75/8285	102/14199	0.000999509	0.0744065	0.0721964	672/4361/2273/50484/1112/57504/55743/8555/4998/51720/6790/63967/990/8317/4683/51343/5889/80279/595/51147/26271/900/9555/60672/25949/1063/9928/9525/3306/27183/891/51347/1019/79621/27133/90381/7157/23476/351/51514/8444/85417/472/1111/8091/22976/9577/995/29980/80174/84142/152110/11073/993/5885/219736/5347/6240/4204/25942/57099/55031/983/5569/79915/9212/4869/5890/79184/5087/116224/135458/641/91603/54…	75
GO:2001022	positive regulation of response to DNA damage stimulus	90/8285	125/14199	0.00103878	0.0763417	0.0740741	54799/672/1663/9774/11284/23201/54929/2139/54556/7515/60/57103/55063/55183/51720/2521/51776/23411/23347/2332/1655/51111/2305/10635/8914/51147/9025/2070/10902/8087/55719/80314/54537/9643/9521/5582/8089/5111/84787/84250/56907/84893/1660/26122/6498/4609/10097/83666/5366/23126/142/1956/138151/6188/472/8091/22925/1054/64210/56776/22976/9577/150275/4487/84142/64769/165918/23514/161742/4824/84717/7336/1…	90
GO:0051304	chromosome separation	67/8285	90/14199	0.00105147	0.0763417	0.0740741	996/7756/10460/8452/54908/7175/29945/1459/9319/55743/4292/7155/10403/9183/51433/990/84861/1457/5518/9400/26271/7272/1063/10783/23397/9587/7517/55795/9787/56984/8881/7153/891/324/55755/57520/1062/5925/129563/51143/472/64682/9184/146956/286053/701/130951/164045/56916/4085/5885/5347/81620/699/55055/11065/2072/348654/80010/9212/9735/57697/84464/51434/197342/51451/1325	67
GO:0030010	establishment of cell polarity	95/8285	133/14199	0.00117492	0.084265	0.0817621	56603/5048/9265/22902/54908/4134/10758/10565/4649/387/5590/6093/2011/23291/3993/23332/6624/4983/3320/10403/2932/2195/10890/9183/3326/1399/4627/55612/284217/23094/81704/23189/2625/22841/8729/9267/90410/9750/10090/5754/64083/23286/51421/7474/3280/23150/117583/85440/3834/154796/5908/2302/2258/3996/9826/10207/9475/23418/4752/10253/55755/9585/3480/54828/81609/51057/6993/4478/79648/56288/9638/3688/5569…	95
GO:0000288	nuclear-transcribed mRNA catabolic process, deadenylation-dependent decay	48/8285	62/14199	0.0012786	0.0895174	0.0868585	7812/23034/54542/4904/26986/23016/4292/57690/79670/22894/27327/23112/51010/22849/4848/11044/57472/11340/27161/23019/7538/23404/23318/10492/1660/149041/3184/246175/10140/5433/154197/25819/678/255967/3192/10642/7832/5436/10605/167227/201626/27257/55095/56478/677/29883/197135/55802	48
GO:0044784	metaphase/anaphase transition of cell cycle	48/8285	62/14199	0.0012786	0.0895174	0.0868585	996/7756/10460/8452/54908/7175/29945/9319/55743/10403/9183/51433/990/84861/26271/7272/1063/10783/9587/7517/55795/9787/56984/8881/891/324/55755/57520/1062/5925/51143/472/64682/9184/286053/701/4085/5885/5347/81620/699/55055/11065/348654/9212/9735/51434/51451	48
GO:2000045	regulation of G1/S transition of mitotic cell cycle	89/8285	124/14199	0.00129871	0.0898552	0.0871862	55904/637/4331/2273/23026/51512/1739/79960/5933/990/51322/25793/328/79791/5934/2146/595/55626/896/5515/3373/1981/90/3398/6118/9928/5311/51692/11319/6491/10385/54617/10197/26057/902/324/4193/55198/10457/9314/81853/5962/5925/8451/7157/57521/207/58190/1956/1030/1029/138151/472/6868/55835/9510/134353/163786/26060/8450/3275/59343/7015/51339/29117/7465/6240/11170/55159/8738/5356/596/6241/27085/51379/84…	89
GO:0046700	heterocycle catabolic process	264/8285	402/14199	0.00136654	0.0934494	0.0906737	22875/23098/5976/60528/7812/1800/23034/51071/1244/7431/8635/55596/54888/23644/23517/9967/954/23369/54542/10758/8531/4904/1994/6093/23293/26986/5151/38/23016/10179/4292/22978/57690/79670/22894/22803/2521/8761/27327/3183/26523/11332/1153/4670/27443/51733/9567/3162/23112/23405/79882/328/25939/2332/23417/2935/23475/50804/259307/59284/1777/56006/4521/23658/644/51010/22849/23185/22794/1655/55110/4848/1…	264
GO:0006312	mitotic recombination	22/8285	25/14199	0.00141609	0.0952014	0.0923736	5893/2067/4361/5888/7515/4292/4436/11144/5889/4437/10111/7517/7014/675/51002/286053/79677/2072/348654/5892/25788/23137	22
GO:2000278	regulation of DNA biosynthetic process	83/8285	115/14199	0.00142454	0.0952014	0.0923736	3082/11284/5982/5588/23293/5063/79960/7520/3320/3776/79977/4216/50507/8550/3183/3326/5594/9837/9767/143/27000/80351/10728/5985/51147/64094/54464/10575/4751/6950/3181/63922/25913/54552/1736/7014/5111/5983/55226/3178/10574/11143/9314/4609/1545/3184/2247/409/7157/4931/79618/84296/7013/472/1111/22948/140609/26272/3192/10694/2264/4880/7203/64769/5984/10576/1499/84289/54921/25849/5394/167227/545/9212/6…	83
GO:0043484	regulation of RNA splicing	103/8285	146/14199	0.00148498	0.0975157	0.0946191	10181/1195/10659/9967/6433/11338/23210/26528/9130/10179/55796/54715/5978/55696/2521/6732/3189/1153/10521/55147/6430/56853/64863/2332/5935/23064/708/1655/3312/27339/6207/4928/8683/6428/9444/57396/83989/8087/4691/6432/6429/58155/58517/10657/3181/79026/79171/84081/3188/79066/22927/9584/10656/2926/55544/10250/54407/6733/84872/3178/6426/6434/7009/10150/4857/60677/387597/92906/10658/10284/4154/3192/135…	103
GO:0007549	dosage compensation	19/8285	21/14199	0.00149233	0.0975157	0.0946191	5976/3720/672/55506/23347/9555/55791/51132/63978/9425/3192/64783/56339/5394/10209/23512/84333/10336/29890	19
GO:0051784	negative regulation of nuclear division	41/8285	52/14199	0.00152136	0.0977296	0.0948267	7756/54908/7175/6196/9319/10403/9183/84861/655/26271/7272/5810/1063/9587/7517/55795/56984/891/324/55755/1761/10040/51143/472/1111/9184/286151/701/4085/5885/5347/81620/699/27085/55055/146691/54998/348654/9212/9735/51451	41
GO:0044270	cellular nitrogen compound catabolic process	268/8285	409/14199	0.00152884	0.0977296	0.0948267	22875/23098/5976/60528/7812/1800/23034/51071/1244/7431/8635/55596/54888/23644/23517/9967/954/23369/54542/10758/8531/4904/1994/6093/23293/26986/5151/38/23016/10179/4292/22978/57690/79670/22894/22803/2521/8761/27327/3183/26523/11332/1153/4670/27443/51733/9567/3162/23112/23405/79882/328/25939/2332/23417/2935/23475/50804/259307/59284/1777/56006/1577/4521/23658/644/51010/22849/23185/22794/1655/55110/4…	268
GO:2000779	regulation of double-strand break repair	77/8285	106/14199	0.00154743	0.0978541	0.0949475	23028/54799/1663/11284/5888/10721/7158/54556/60/51548/55063/55183/2521/23347/51366/9400/7468/51111/2305/10635/8914/10902/4968/6118/55719/80314/54537/7291/78996/9643/7913/92797/8089/79000/25913/63979/84787/84250/56154/56907/84893/26122/10097/22891/83666/23126/142/1111/5531/8091/9320/64210/56776/151987/64769/115004/23514/254225/54386/84717/7336/80311/116028/8607/64110/7334/2187/29072/57634/55010/10…	77
GO:0140694	non-membrane-bounded organelle assembly	232/8285	351/14199	0.00156597	0.097973	0.0950629	8837/26073/9855/7812/7756/54443/672/7175/5601/23369/259266/54505/387/4205/9948/8243/23332/6624/284403/4292/10615/10529/1906/7520/10403/29093/10464/6193/25978/22924/51510/6790/22974/64147/6128/6175/24137/825/7430/1153/4605/3055/9371/22919/128866/55125/10735/80152/9738/22995/6713/6795/6223/8605/56647/9126/4591/3837/708/2648/5573/4621/1656/56890/4848/4839/26271/23195/26054/57472/8850/6152/6209/51652…	232
GO:0030518	intracellular steroid hormone receptor signaling pathway	75/8285	103/14199	0.00158653	0.0982147	0.0952974	2288/23028/1407/672/9604/23376/3670/8611/387/4734/9063/79876/23411/3717/10521/2033/9325/51366/2692/23081/57178/1655/55325/10728/4848/51389/2908/7337/27086/55818/11315/3065/11240/8289/51569/1408/5585/56937/23019/5469/6597/6049/7533/3169/9667/9113/9575/2100/9611/10498/142/9125/7110/6502/4306/3275/6294/4824/5245/8085/9420/6879/51341/5187/811/149563/9612/29966/25959/65992/81606/11331/161582/8031/79447	75
GO:0030071	regulation of mitotic metaphase/anaphase transition	45/8285	58/14199	0.00166709	0.102127	0.0990934	996/7756/8452/54908/7175/29945/9319/10403/9183/51433/990/84861/26271/7272/1063/10783/9587/7517/55795/9787/56984/8881/891/324/55755/57520/1062/5925/51143/472/9184/286053/701/4085/5885/5347/81620/699/55055/11065/348654/9212/9735/51434/51451	45
GO:0010965	regulation of mitotic sister chromatid separation	47/8285	61/14199	0.00171901	0.103373	0.100303	996/7756/10460/8452/54908/7175/29945/9319/10403/9183/51433/990/84861/26271/7272/1063/10783/9587/7517/55795/9787/56984/8881/891/324/55755/57520/1062/5925/51143/472/64682/9184/286053/701/4085/5885/5347/81620/699/55055/11065/348654/9212/9735/51434/51451	47
GO:0018209	peptidyl-serine modification	195/8285	292/14199	0.00172957	0.103373	0.100303	799/10178/8798/1634/1195/3082/960/5583/7444/5601/57600/54969/65125/28996/5586/5588/5590/6093/5165/375449/1459/815/6196/27330/7037/2011/5743/9175/4140/3320/2932/9706/23139/51701/6790/8550/63967/10044/3326/8317/5594/9647/57452/7443/9252/10110/6789/9770/1457/8312/23678/8767/3551/51231/6795/208/857/6505/7046/5599/9806/22943/6198/10114/1389/1432/11329/7422/7272/5144/1452/11235/7474/1981/5334/4139/1131…	195
GO:2001252	positive regulation of chromosome organization	65/8285	88/14199	0.00175114	0.103373	0.100303	9918/2067/1663/4361/11284/7175/5588/51548/7520/546/4216/8550/5594/4683/80351/64151/10111/9555/10051/10575/6421/4751/55719/6950/23397/3181/9587/25913/1786/1736/7014/84250/22880/51535/3178/10574/83852/10592/3184/9869/79618/472/22948/140609/26272/10694/286053/7203/23272/5885/10576/80063/81620/1499/2237/25942/55729/3981/55196/545/9212/79008/84464/54737/23137	65
GO:0051306	mitotic sister chromatid separation	49/8285	64/14199	0.00175837	0.103373	0.100303	996/7756/10460/8452/54908/7175/29945/9319/10403/9183/51433/990/84861/5518/26271/7272/1063/10783/9587/7517/55795/9787/56984/8881/891/324/55755/57520/1062/5925/129563/51143/472/64682/9184/286053/701/4085/5885/5347/81620/699/55055/11065/348654/9212/9735/51434/51451	49
GO:0033143	regulation of intracellular steroid hormone receptor signaling pathway	51/8285	67/14199	0.00178633	0.103373	0.100303	23028/1407/672/9604/23376/3670/387/9063/79876/23411/2033/2692/23081/1655/55325/4848/27086/11315/3065/51569/1408/5585/23019/5469/6597/6049/3169/9667/9113/9575/9611/10498/142/9125/6502/3275/5245/8085/9420/51341/5187/811/149563/9612/29966/25959/65992/81606/11331/161582/79447	51
GO:0051983	regulation of chromosome segregation	61/8285	82/14199	0.00179291	0.103373	0.100303	996/7756/10460/8452/54908/7175/29945/23369/23063/1459/56852/9319/55743/10403/9183/51433/990/84861/1457/26271/7272/1063/10783/9587/7517/55795/9787/56984/8881/891/9698/324/55755/57520/1062/5925/51143/4288/472/64682/3192/9184/286053/701/79677/4085/5885/5347/81620/699/339834/55055/11065/116028/348654/9212/9735/157313/51434/23137/51451	61
GO:0000289	nuclear-transcribed mRNA poly(A) tail shortening	24/8285	28/14199	0.00187413	0.107007	0.103829	23034/26986/4292/57690/79670/27327/23112/22849/4848/11044/57472/27161/23019/7538/23318/246175/10140/154197/255967/7832/5436/55095/56478/29883	24
GO:0007088	regulation of mitotic nuclear division	74/8285	102/14199	0.00200733	0.113381	0.110013	996/7756/3479/8452/54908/9820/7175/29945/8621/9319/1906/10403/9183/6790/51433/84861/655/55512/3209/2253/26271/23113/7272/4751/1063/23363/9587/7517/55795/9787/9088/56984/8881/891/324/55755/1761/51203/9585/1950/5925/10040/51143/55023/4288/472/1111/9184/286151/286053/701/995/54461/4085/5885/5347/81620/1613/83987/699/3643/27085/55055/146691/54998/348654/9212/1104/9735/157313/26013/51434/51451/57026	74
GO:0007163	establishment or maintenance of cell polarity	140/8285	205/14199	0.00202432	0.113381	0.110013	56603/5048/9265/23221/22902/286/54908/1495/4134/10758/10565/4649/387/5590/6093/9948/9886/2011/23291/3993/23332/6624/60/1739/4983/3320/10403/2932/2195/10890/9183/3326/1399/4627/55612/284217/23322/64130/23094/9355/81704/23189/9124/2625/22841/8729/9267/90410/9750/10090/10486/5754/55914/64083/23286/51421/7474/3280/23150/10096/10494/390/117583/85440/3071/84612/3834/154796/5908/2302/2258/3996/9826/1020…	140
GO:0008380	RNA splicing	264/8285	404/14199	0.00207285	0.113735	0.110357	10181/23028/10180/6936/55692/1195/9716/11171/55596/23517/10659/9967/6433/11338/10147/8621/4904/1659/27238/23210/26986/26528/9130/1207/27332/10179/55094/55796/6626/54715/9984/1653/25929/10450/5978/51729/55696/51637/10992/2521/55285/10081/3183/8487/55280/6732/988/3189/1153/4670/10521/51493/8563/84844/55147/6430/22985/5411/24148/51340/56853/64863/2332/27336/5935/8175/55702/5518/57794/55131/23658/230…	264
GO:1990138	neuron projection extension	112/8285	161/14199	0.00208143	0.113735	0.110357	51265/5048/6792/9043/7869/22902/7414/23327/26999/9423/57609/5590/6857/9175/10371/10512/4133/1906/22999/3320/54437/2932/9706/6790/9962/393/5459/4897/57556/1808/3326/25/8829/23394/51760/5802/59284/3984/9355/6456/1855/6387/5532/1982/8437/8936/7422/9037/7474/5361/150465/3676/57142/2335/8828/53335/63923/8239/57699/51299/23769/23499/6049/440275/23025/10439/55558/9201/10505/9856/56924/80031/8826/114804/…	112
GO:0010975	regulation of neuron projection development	259/8285	396/14199	0.00211525	0.113735	0.110357	8837/23098/2288/23028/9912/51265/5048/6792/2534/7869/22902/1272/3082/7431/27067/9820/2042/3309/84062/23327/23105/816/1608/11178/9423/57609/25791/387/4734/2011/1400/9175/10371/10512/5362/5063/4133/9139/1136/5663/54437/2932/9706/393/4897/3655/57556/25/8829/1399/25793/2033/51199/23394/655/4168/8428/79006/79791/11075/8175/84079/5802/6324/5764/23242/54664/2146/3984/23189/23413/2889/23064/1855/2625/638…	259
GO:0000184	nuclear-transcribed mRNA catabolic process, nonsense-mediated decay	31/8285	38/14199	0.00212734	0.113735	0.110357	5976/23293/26986/2935/56006/22794/55110/22916/9887/2107/65109/9704/9775/154197/26019/51594/23049/4116/55181/65110/84305/5394/167227/79048/55629/23708/3182/23381/10921/9939/55802	31
GO:0033260	nuclear DNA replication	31/8285	38/14199	0.00212734	0.113735	0.110357	5976/10926/5888/54962/4175/10269/546/8318/8317/9837/5422/4173/3978/4172/51053/54617/7014/5111/1763/675/7013/29980/80174/7486/81620/2237/79915/64785/641/91603/1602	31
GO:0034502	protein localization to chromosome	66/8285	90/14199	0.00220582	0.115825	0.112385	3720/25900/55166/54908/23063/6688/7520/10403/546/9183/4436/55506/10664/2146/80351/254394/7272/9555/10575/6118/55719/6950/25913/23383/54552/1736/6117/7014/84250/51535/10574/57082/675/5925/91272/113130/55869/7013/22948/152485/7518/9184/10694/221496/7203/23272/25836/7015/5885/23514/10576/54386/5347/81620/79003/983/157570/27085/55055/545/9212/29072/9735/283489/23137/54984	66
GO:0045739	positive regulation of DNA repair	66/8285	90/14199	0.00220582	0.115825	0.112385	54799/672/1663/11284/23201/54929/2139/54556/7515/60/57103/55063/55183/51720/2521/23411/23347/51111/2305/10635/8914/9025/2070/10902/55719/80314/54537/9643/5582/8089/5111/84787/84250/56907/1660/26122/10097/83666/23126/142/1956/6188/1054/64210/56776/9577/150275/84142/64769/165918/23514/84717/7336/4862/8607/7334/2187/57634/79184/10933/55693/3014/196528/84501/2074/5591	66
GO:0051642	centrosome localization	26/8285	31/14199	0.00230043	0.118543	0.115022	5048/23224/55726/259266/1739/5362/6790/7430/25777/51199/90410/55171/117583/9787/10142/1783/29109/56288/5903/285025/4085/23353/81565/3799/51134/51490	26
GO:1902099	regulation of metaphase/anaphase transition of cell cycle	46/8285	60/14199	0.00230128	0.118543	0.115022	996/7756/8452/54908/7175/29945/9319/55743/10403/9183/51433/990/84861/26271/7272/1063/10783/9587/7517/55795/9787/56984/8881/891/324/55755/57520/1062/5925/51143/472/9184/286053/701/4085/5885/5347/81620/699/55055/11065/348654/9212/9735/51434/51451	46
GO:1903312	negative regulation of mRNA metabolic process	60/8285	81/14199	0.00231805	0.118543	0.115022	7812/9967/10758/8531/6433/11338/4904/1994/26986/2521/3183/1153/79882/56853/2332/9810/23185/708/8683/1432/11044/6432/6429/23435/3181/79171/79066/7538/9704/10492/1660/580/3184/10140/10284/25819/51594/3192/135295/56254/1859/10642/9261/3190/2668/8313/10605/90806/10949/8241/54855/11187/56478/79048/10772/6829/3182/9646/10921/373863	60
GO:0031396	regulation of protein ubiquitination	139/8285	204/14199	0.0024012	0.121737	0.118121	2729/23028/23077/1407/6224/83932/2534/672/23376/330/8452/54165/3309/5601/9474/11338/55743/5663/3320/8555/55100/3301/10075/3326/25/9978/5716/54602/9683/8312/9810/8767/51366/51343/857/3984/7046/23560/5414/80279/23142/7466/329/23328/26271/9532/6500/7337/7375/868/6209/11315/10625/84930/6125/9111/6659/9349/5582/54552/80758/80762/29979/10253/64844/79139/2295/84259/144165/55215/409/207/6135/8915/6167/65…	139
GO:0048024	regulation of mRNA splicing, via spliceosome	71/8285	98/14199	0.00260466	0.130923	0.127034	10181/10659/9967/6433/11338/23210/26528/10179/55796/54715/5978/6732/1153/10521/55147/56853/2332/5935/708/1655/3312/27339/4928/8683/6428/9444/83989/8087/4691/6432/6429/58517/10657/3181/79171/84081/79066/9584/10656/10250/6733/84872/3178/6434/10150/4857/60677/10658/10284/4154/3192/135295/1859/6651/4116/55225/64783/57703/29896/3190/146713/7536/5936/51574/51341/8241/54033/10772/10921/29890/9939	71
GO:0045839	negative regulation of mitotic nuclear division	37/8285	47/14199	0.00270944	0.13418	0.130194	7756/54908/7175/9319/10403/9183/84861/655/26271/7272/1063/9587/7517/55795/56984/891/324/55755/10040/51143/472/1111/9184/701/4085/5885/5347/81620/699/27085/55055/146691/54998/348654/9212/9735/51451	37
GO:0010389	regulation of G2/M transition of mitotic cell cycle	67/8285	92/14199	0.00274583	0.13418	0.130194	672/4361/2273/50484/1112/57504/55743/8555/4998/51720/6790/63967/990/8317/4683/51343/5889/80279/595/26271/900/60672/25949/1063/9928/9525/3306/27183/891/51347/1019/79621/27133/90381/23476/351/51514/85417/472/1111/8091/9577/995/29980/80174/84142/11073/993/5885/219736/5347/6240/4204/25942/57099/55031/983/5569/9212/5890/79184/5087/116224/135458/641/91603/54984	67
GO:0006413	translational initiation	80/8285	112/14199	0.00278213	0.13418	0.130194	56919/7812/7175/5610/1975/54505/8891/8672/1653/9689/6193/8668/4528/27102/10959/51386/8846/2332/5611/123263/8669/3315/8662/8661/6198/1982/1967/22916/10289/1981/2733/51247/10987/10657/219402/27161/400961/8894/468/440275/1968/8666/22927/1965/9470/1939/5433/83939/8893/8667/1979/10480/6188/54915/8872/127933/55364/1974/4690/9669/1973/7884/6059/56339/5436/10605/1964/10209/5936/6199/255308/4869/253943/19…	80
GO:0006298	mismatch repair	23/8285	27/14199	0.00278353	0.13418	0.130194	2067/5378/4292/10714/7161/4436/25/3978/6119/254394/4437/2956/6118/27030/5395/5582/6117/5111/6996/7508/8313/9156/29072	23
GO:0010971	positive regulation of G2/M transition of mitotic cell cycle	23/8285	27/14199	0.00278353	0.13418	0.130194	50484/57504/8317/5889/595/26271/9525/3306/891/1019/23476/351/51514/995/80174/993/219736/6240/4204/25942/983/5890/5087	23
GO:0050773	regulation of dendrite development	63/8285	86/14199	0.00287521	0.137472	0.133389	23098/51265/5048/6792/27067/9820/23327/816/1608/11178/387/4734/5063/1136/2932/25/1399/655/79791/84079/5764/23242/54664/2146/9693/23316/653/2043/4139/23271/53335/23363/5911/7533/84816/577/4076/153090/9856/56965/3706/10097/57520/10498/7436/5789/23043/7804/100528062/114788/382/26012/1398/6383/85442/26259/29882/57118/10507/5649/26037/80823/1523	63
GO:0006913	nucleocytoplasmic transport	193/8285	291/14199	0.00294176	0.138404	0.134293	5976/23633/23279/8498/54888/999/7175/10758/4659/23534/3843/1994/55746/4734/23293/5743/55421/9984/5663/55437/2932/7514/2646/51194/55696/57506/10762/23511/3326/3717/84271/8563/5905/27351/8106/4792/6789/8480/55612/2010/2254/3839/10204/8312/6788/51366/30000/2737/51684/3837/4927/6830/10553/4928/57122/11052/1432/6428/60468/51715/1871/3313/9631/3836/1894/868/22916/6209/7341/11315/9887/2733/55051/56943/5…	193
GO:0051169	nuclear transport	193/8285	291/14199	0.00294176	0.138404	0.134293	5976/23633/23279/8498/54888/999/7175/10758/4659/23534/3843/1994/55746/4734/23293/5743/55421/9984/5663/55437/2932/7514/2646/51194/55696/57506/10762/23511/3326/3717/84271/8563/5905/27351/8106/4792/6789/8480/55612/2010/2254/3839/10204/8312/6788/51366/30000/2737/51684/3837/4927/6830/10553/4928/57122/11052/1432/6428/60468/51715/1871/3313/9631/3836/1894/868/22916/6209/7341/11315/9887/2733/55051/56943/5…	193
GO:0006289	nucleotide-excision repair	43/8285	56/14199	0.00301518	0.140733	0.136552	5893/2067/10463/4331/11284/1161/5424/4287/10714/23411/5438/6119/2967/4968/6118/5887/51426/85015/6117/1643/2073/83990/11143/675/8451/7157/7508/64210/54778/2176/2071/57654/27343/150684/3981/2072/5426/5886/84464/135458/29935/2074/404672	43
GO:0051236	establishment of RNA localization	108/8285	156/14199	0.00317709	0.147122	0.142752	5976/9961/23279/54888/7175/55706/4904/55746/23293/10644/55421/79023/54715/9984/7514/81929/51637/10762/23511/84271/8563/8106/8480/2332/10204/3837/4927/6830/4928/57097/57122/11052/6428/29074/9444/9631/22916/6432/9887/2733/55051/348995/56943/10657/3181/10212/57510/9972/65109/79902/57187/55795/8021/7538/7263/79228/23225/5901/3178/1660/10643/11097/6426/87178/10128/6741/53371/144983/5433/7013/472/26019…	108
GO:0000018	regulation of DNA recombination	83/8285	117/14199	0.00320404	0.147211	0.142838	23028/54799/4361/5888/10721/7158/54556/7037/60/4292/51548/55063/9984/55183/2521/4436/23347/51010/9400/6830/7468/51111/10635/8914/10902/4437/10111/3836/2956/7292/6118/7320/80314/84083/54537/9643/92797/8089/80762/63979/7014/84787/56154/84893/26122/3586/10097/22891/121260/23126/142/1111/5531/64210/22976/56916/151987/64769/115004/23514/54386/84717/3008/200558/80311/116028/8607/79915/64110/2187/29072/…	83
GO:0045948	positive regulation of translational initiation	20/8285	23/14199	0.00326628	0.148752	0.144334	54505/5611/6198/10657/440275/22927/5433/8893/54915/8872/127933/55364/4690/56339/5436/6199/253943/51441/2475/1654	20
GO:1902100	negative regulation of metaphase/anaphase transition of cell cycle	32/8285	40/14199	0.003293	0.148752	0.144334	7756/54908/7175/9319/55743/10403/9183/84861/26271/7272/1063/9587/7517/55795/56984/891/324/55755/51143/472/9184/701/4085/5885/5347/81620/699/55055/348654/9212/9735/51451	32
GO:0051640	organelle localization	319/8285	496/14199	0.00331348	0.148752	0.144334	5048/6853/9043/83930/25900/6683/55166/9846/55773/8452/54908/5874/84062/57102/4134/9341/23224/81671/9423/9892/259266/5590/6857/4205/10947/2011/23291/3993/8301/23332/7251/1739/7879/4292/10615/4133/5108/56681/8417/5663/10403/7514/10464/25978/3797/10890/81929/51510/10959/7462/9183/10059/29058/10726/8773/7430/372/9342/25777/3162/4627/10490/3091/9321/9371/128866/79953/94121/51566/55512/8120/55156/8677/…	319
GO:0031346	positive regulation of cell projection organization	205/8285	311/14199	0.00343493	0.153037	0.148491	8837/23028/1856/5898/51265/57787/5048/6792/10178/2534/54443/22902/1272/3082/27067/9820/2042/3309/816/10787/9423/2011/9175/6624/5362/5063/9139/55604/2932/3655/25/8829/2033/51199/23394/655/2332/8428/8874/79006/79791/9738/11075/8175/84079/6324/5764/23242/8976/54664/2146/3984/7046/2889/23064/1855/6387/9148/5216/2648/9693/1982/4192/23603/23316/9750/653/8724/9896/5754/55754/7422/9037/411/1809/7474/5361…	205
GO:0000722	telomere maintenance via recombination	14/8285	15/14199	0.00360874	0.155433	0.150816	2067/5888/7515/5889/10111/7517/7014/675/51002/286053/79677/2072/5892/23137	14
GO:0006271	DNA strand elongation involved in DNA replication	14/8285	15/14199	0.00360874	0.155433	0.150816	3980/10714/9837/5422/4173/3978/5425/4172/5111/5983/1763/5984/4176/5426	14
GO:0060211	regulation of nuclear-transcribed mRNA poly(A) tail shortening	14/8285	15/14199	0.00360874	0.155433	0.150816	26986/57690/27327/23112/22849/11044/27161/23019/7538/10140/7832/5436/56478/29883	14
GO:0009048	dosage compensation by inactivation of X chromosome	17/8285	19/14199	0.00362956	0.155433	0.150816	5976/3720/672/23347/55791/51132/63978/9425/3192/64783/56339/5394/10209/23512/84333/10336/29890	17
GO:0070584	mitochondrion morphogenesis	17/8285	19/14199	0.00362956	0.155433	0.150816	26073/10059/79784/8936/10087/81892/80025/87178/9638/80224/6832/56947/4534/598/5339/51024/11232	17
GO:1902806	regulation of cell cycle G1/S phase transition	102/8285	147/14199	0.0036473	0.155433	0.150816	55904/51603/637/4331/2273/23026/51512/1739/79960/5933/990/51322/25793/328/79791/5934/2146/595/55626/2735/896/5515/3373/1981/90/3398/6118/9928/5311/51692/6909/11319/6491/10385/54617/10197/26057/902/324/4193/55198/10457/9314/81853/5962/5925/8451/7157/57521/207/58190/1956/6872/1030/1029/138151/472/6868/55835/9510/134353/163786/26060/8450/3275/59343/7015/51339/29117/252983/7465/4824/6240/11170/55159/…	102
GO:0016241	regulation of macroautophagy	107/8285	155/14199	0.00382415	0.161797	0.156992	26073/1634/823/535/23274/51606/55187/57602/9474/11178/55737/4734/5289/57103/27244/27131/10558/55763/23256/51322/23411/51100/3162/51382/9517/3091/128866/55613/8767/665/10392/6009/5599/55626/2597/7957/8992/8723/523/22930/5768/149371/25782/5290/9559/826/22863/54832/58533/60412/29979/6885/4864/7157/207/245973/5899/9711/9140/526/245972/203228/401548/90678/143686/9638/5305/112936/291/9531/26353/60592/7…	107
GO:0006446	regulation of translational initiation	54/8285	73/14199	0.00396728	0.165062	0.16016	7812/7175/5610/1975/54505/8672/1653/9689/4528/27102/10959/8846/2332/5611/3315/8662/6198/1982/22916/10289/1981/2733/51247/10657/27161/400961/468/440275/22927/1965/5433/8893/8667/1979/54915/8872/127933/55364/1974/4690/9669/56339/5436/10605/10209/5936/6199/4869/253943/1978/51441/2475/1654/8637	54
GO:0051865	protein autoubiquitination	54/8285	73/14199	0.00396728	0.165062	0.16016	672/8452/1161/56852/7319/83737/4850/11342/4799/25831/9978/4591/7323/50862/867/23328/9025/7337/127544/90025/81847/7320/26994/7322/6737/79845/1643/4193/64844/91445/114804/6872/115426/90678/57630/153769/267/25893/51127/5896/344558/57674/7189/9112/84851/5071/168433/120892/51136/54708/11060/26046/131405/27246	54
GO:0032784	regulation of DNA-templated transcription, elongation	42/8285	55/14199	0.00402718	0.165062	0.16016	10771/8621/9984/905/8812/11198/8563/51497/27336/8312/8178/2146/9400/6830/9025/10915/22936/10102/55837/7428/11143/23476/55840/3192/284695/23160/165918/123169/51755/1499/55209/6919/51574/7469/10614/25920/6829/8861/3150/22828/6827/2074	42
GO:0033045	regulation of sister chromatid segregation	50/8285	67/14199	0.004059	0.165062	0.16016	996/7756/10460/8452/54908/7175/29945/9319/55743/10403/9183/51433/990/84861/26271/7272/1063/10783/9587/7517/55795/9787/56984/8881/891/324/55755/57520/1062/5925/51143/472/64682/3192/9184/286053/701/4085/5885/5347/81620/699/55055/11065/116028/348654/9212/9735/51434/51451	50
GO:1905818	regulation of chromosome separation	50/8285	67/14199	0.004059	0.165062	0.16016	996/7756/10460/8452/54908/7175/29945/1459/9319/55743/10403/9183/51433/990/84861/1457/26271/7272/1063/10783/9587/7517/55795/9787/56984/8881/891/324/55755/57520/1062/5925/51143/472/64682/9184/286053/701/4085/5885/5347/81620/699/55055/11065/348654/9212/9735/51434/51451	50
GO:0030865	cortical cytoskeleton organization	44/8285	58/14199	0.00406973	0.165062	0.16016	5048/23221/54443/11215/10787/387/6093/9948/9886/3993/1739/2037/23136/55012/7430/3551/1894/390/5357/3071/3996/27183/9475/80206/29109/3936/5879/7094/54509/85369/388/114793/2035/91010/29127/22836/382/399/5881/22871/10015/391/5339/811	44
GO:0015012	heparan sulfate proteoglycan biosynthetic process	22/8285	26/14199	0.00411219	0.165642	0.160722	2137/64132/7358/29940/9375/9953/9394/64579/55790/6934/26229/2132/9653/92370/2135/8509/1499/90161/126792/2131/266722/222537	22
GO:0019439	aromatic compound catabolic process	271/8285	419/14199	0.00419612	0.167873	0.162887	22875/23098/5976/60528/7812/23034/51071/1244/7431/8635/55596/54888/23644/23517/9967/954/23369/54542/10758/8531/4904/1994/6093/4129/23293/26986/5151/38/23016/10179/4292/22978/57690/26002/79670/22894/22803/2521/8761/27327/3183/26523/1312/11332/1153/4670/27443/51733/9567/3162/23112/23405/79882/328/25939/2332/23417/2935/2184/50804/259307/59284/1777/56006/4521/23658/644/51010/22849/23185/22794/1655/55…	271
GO:0043516	regulation of DNA damage response, signal transduction by p53 class mediator	29/8285	36/14199	0.00424502	0.168682	0.163672	23028/960/10269/23411/5716/55702/1655/51147/7291/6615/6659/9521/4193/64844/8533/7157/5366/8444/56950/472/22925/1859/4487/161742/545/3090/754/387893/200734	29
GO:0010769	regulation of cell morphogenesis involved in differentiation	65/8285	90/14199	0.00438949	0.172566	0.16744	51265/5048/6792/27067/9820/816/55679/10979/6480/5063/2192/55604/57091/25/8829/1399/11078/8874/79791/84079/23189/7016/708/4192/23603/23316/10675/2043/335/9270/23363/57580/6239/4076/5879/56965/3706/10097/55435/80005/1793/5789/7804/100528062/10630/10109/4241/1398/5747/5881/3987/253725/26259/29882/811/6900/1946/10519/5034/5649/2316/6281/80823/5591/1523	65
GO:0001764	neuron migration	101/8285	146/14199	0.00440144	0.172566	0.16744	5048/6792/2534/340533/816/9423/259266/4756/815/2011/10371/284403/7155/2260/5108/5663/4208/4897/57556/8829/1399/8846/79791/7976/26468/2625/6387/57178/5414/9693/4192/387119/221692/7422/4139/8828/23314/63923/7291/8239/389549/2258/85451/9201/55140/5879/153090/9856/347733/9585/4916/343472/2676/51473/2796/4915/23284/2823/6695/285313/2697/4929/57630/346288/137970/3084/26053/22854/5194/27185/4825/25836/3…	101
GO:0042073	intraciliary transport	31/8285	39/14199	0.00457995	0.176735	0.171485	8100/5108/11158/80173/11020/51098/9371/79989/90410/4117/22858/55081/117178/56912/57539/89891/112752/79809/55112/167691/26160/51626/403/22994/150082/57728/55764/7275/79659/9742/26146	31
GO:0045841	negative regulation of mitotic metaphase/anaphase transition	31/8285	39/14199	0.00457995	0.176735	0.171485	7756/54908/7175/9319/10403/9183/84861/26271/7272/1063/9587/7517/55795/56984/891/324/55755/51143/472/9184/701/4085/5885/5347/81620/699/55055/348654/9212/9735/51451	31
GO:0030705	cytoskeleton-dependent intracellular transport	130/8285	192/14199	0.00459793	0.176735	0.171485	5048/440193/6683/8100/27067/5874/84062/23095/23224/5590/10947/23291/1781/4133/5108/11158/3797/24137/29911/80173/25777/11020/3091/51098/9371/51566/8120/147700/79989/3315/8976/57584/90410/3312/4117/22858/8936/55081/55704/66008/6421/117178/56912/55686/57539/89891/112752/10376/79809/55112/4430/55930/10749/547/11127/7014/8546/55207/51361/23287/167691/63971/84709/54874/26160/51626/10128/403/23162/8499/…	130
GO:0006403	RNA localization	128/8285	189/14199	0.0048339	0.184599	0.179116	5976/9961/23279/54888/7175/51602/55706/4904/55746/23293/10644/55421/79023/54715/9984/7514/81929/51637/10762/23511/84271/8563/8106/8480/24148/2332/10204/22794/3837/4927/6830/4928/57097/57122/11052/6428/29074/9444/9631/22916/10575/6432/9887/54680/2733/55051/348995/6950/56943/10657/3181/10212/57510/9972/65109/79902/57187/55795/8021/7538/7263/1736/79228/23225/5901/3178/10574/1660/10643/11097/6426/871…	128
GO:0043161	proteasome-mediated ubiquitin-dependent protein catabolic process	260/8285	402/14199	0.00497559	0.188784	0.183176	2729/54467/996/26224/54476/51667/9604/23376/25937/23304/8554/25897/8452/3309/1161/23327/51528/5601/29945/8454/10513/4287/27248/4734/6400/28951/55743/23291/23609/27252/54431/51548/7319/3093/83737/5663/57092/2932/7514/57531/10075/5705/6790/55741/111089941/51433/10296/25831/117584/51322/3326/23411/5714/54620/84861/84164/80020/9978/27351/114088/26133/54994/9097/5716/6907/9683/5713/8312/79791/9325/552…	260
GO:0045005	DNA-templated DNA replication maintenance of fidelity	35/8285	45/14199	0.00504862	0.190326	0.184673	1663/4361/259282/5888/5424/64710/54962/9984/55218/546/25939/8914/254394/84083/5111/84893/22891/1763/55345/675/54465/253714/146956/29980/201973/7486/55159/545/5426/348654/57697/641/197342/91603/1325	35
GO:0010970	transport along microtubule	107/8285	156/14199	0.00523712	0.196175	0.190348	5048/6683/8100/27067/5874/84062/23095/23224/5590/10947/23291/1781/4133/5108/11158/3797/24137/80173/11020/3091/51098/9371/51566/8120/147700/79989/3315/57584/90410/3312/4117/22858/8936/55081/66008/6421/117178/56912/55686/57539/89891/112752/79809/55112/10749/547/11127/7014/8546/55207/23287/167691/63971/84709/26160/51626/10128/403/23162/89941/22994/6647/351/5195/66000/9638/1740/636/667/9531/3192/7345…	107
GO:0061842	microtubule organizing center localization	26/8285	32/14199	0.00545336	0.20207	0.196068	5048/23224/55726/259266/1739/5362/6790/7430/25777/51199/90410/55171/117583/9787/10142/1783/29109/56288/5903/285025/4085/23353/81565/3799/51134/51490	26
GO:0050657	nucleic acid transport	105/8285	153/14199	0.00549758	0.20207	0.196068	5976/9961/23279/54888/7175/55706/4904/55746/23293/10644/55421/79023/54715/9984/7514/81929/51637/10762/23511/84271/8563/8106/8480/2332/10204/3837/4927/6830/4928/57097/57122/11052/6428/29074/9444/9631/22916/6432/9887/2733/55051/348995/56943/10657/3181/10212/57510/9972/65109/79902/57187/55795/8021/7538/7263/79228/23225/5901/3178/1660/10643/11097/6426/87178/10128/6741/53371/144983/5433/26019/3087/107…	105
GO:0050658	RNA transport	105/8285	153/14199	0.00549758	0.20207	0.196068	5976/9961/23279/54888/7175/55706/4904/55746/23293/10644/55421/79023/54715/9984/7514/81929/51637/10762/23511/84271/8563/8106/8480/2332/10204/3837/4927/6830/4928/57097/57122/11052/6428/29074/9444/9631/22916/6432/9887/2733/55051/348995/56943/10657/3181/10212/57510/9972/65109/79902/57187/55795/8021/7538/7263/79228/23225/5901/3178/1660/10643/11097/6426/87178/10128/6741/53371/144983/5433/26019/3087/107…	105
GO:0045945	positive regulation of transcription by RNA polymerase III	16/8285	18/14199	0.00561948	0.205268	0.199171	9031/57680/8178/23451/7913/79664/10514/57521/84524/8467/23379/9188/7702/2972/2475/2074	16
GO:2001251	negative regulation of chromosome organization	62/8285	86/14199	0.0057012	0.206968	0.20082	9031/7756/2067/4331/54908/7175/23063/23293/9319/7515/10403/546/9183/3183/84861/4683/80351/26271/7272/10111/54464/1063/9587/7517/55795/25913/56984/54552/7153/3021/7014/891/324/55226/3178/55755/142/51143/7013/472/8467/3192/9184/701/4085/5885/54386/5347/81620/699/5394/167227/55055/2072/348654/9212/79008/9735/84464/51451/54984/100134934	62
GO:0018410	C-terminal protein amino acid modification	13/8285	14/14199	0.00581103	0.208382	0.202193	9474/60509/2346/2822/150465/23463/23287/9140/26100/84871/10533/51451/123624	13
GO:1903543	positive regulation of exosomal secretion	13/8285	14/14199	0.00581103	0.208382	0.202193	7251/7879/55512/6382/9525/27243/27183/8027/6386/11267/23400/10015/9146	13
GO:1900151	regulation of nuclear-transcribed mRNA catabolic process, deadenylation-dependent decay	21/8285	25/14199	0.0060403	0.21475	0.208371	7812/4904/26986/57690/23112/22849/11044/27161/23019/7538/10492/1660/149041/3184/10140/678/3192/10642/10605/677/29883	21
GO:0000075	cell cycle checkpoint signaling	113/8285	166/14199	0.00609586	0.21475	0.208371	1407/7756/672/4361/54888/54908/7175/57646/1112/7158/9319/55743/54962/51512/9984/10403/8555/4998/9183/51720/51776/79968/63967/8318/990/4436/51322/988/84861/8563/79791/4683/51343/80279/595/27339/8914/1432/7272/900/5810/79858/26270/25949/1063/6118/9587/7517/55795/56984/440275/65975/27183/891/9575/324/51347/4193/79621/83990/55755/1763/8451/90381/7157/261726/51514/25896/54465/2177/51143/472/1111/8091/…	113
GO:0016358	dendrite development	140/8285	209/14199	0.00609814	0.21475	0.208371	23098/9912/51265/5048/6792/23542/2534/55236/27067/9820/80243/84062/23327/23105/3918/816/1608/11178/9423/25791/387/4205/4734/5597/815/8301/10371/5063/4133/1136/5663/4208/2932/25/8829/1399/655/4168/2332/79791/84079/5802/5764/23242/8976/54664/2146/1855/22849/9148/9693/1982/23316/221692/653/7337/6801/2043/4139/23271/8609/53335/23363/5911/23769/7533/547/84816/25830/10298/1742/22903/9201/57498/577/4076…	140
GO:0031331	positive regulation of cellular catabolic process	274/8285	426/14199	0.00613497	0.21476	0.208381	2729/54467/5976/114881/7812/51099/5286/1634/51667/9604/23376/3479/23034/8554/25897/55187/5601/5291/54542/8975/4904/4287/6093/55737/26986/28951/55743/23016/23609/4292/51548/4898/57690/83737/8671/27244/11043/5663/3320/4036/2932/79670/9706/22894/5705/6790/10558/27327/25831/7430/51322/23411/51100/51257/9681/25793/9567/3162/23112/9978/9517/3091/5716/2332/11040/8312/9810/8767/665/6449/208/51343/857/103…	274
GO:0043087	regulation of GTPase activity	207/8285	317/14199	0.00619749	0.215665	0.209259	26073/1856/10344/9912/5048/79090/6792/23637/10928/2042/116984/25771/65125/55633/55854/23216/25791/10565/4649/7813/9448/23161/10979/8301/9462/55843/5362/5909/2932/10959/23348/51291/3655/11069/55357/84144/1399/83874/6305/27352/5905/6655/2245/8874/6367/208/23094/10156/11033/4233/1124/2146/57589/81704/2889/22841/51195/23158/9693/23603/8437/9750/5924/7474/1894/868/5361/10297/22930/6654/2043/55103/5906…	207
GO:0006270	DNA replication initiation	30/8285	38/14199	0.00633466	0.216594	0.21016	23649/4175/4998/23594/8318/990/4174/5422/4683/4173/4172/51053/4999/5000/56897/23595/11143/90381/5558/25792/11073/5001/4176/81620/64318/64785/5813/5557/29935/345643	30
GO:0030261	chromosome condensation	30/8285	38/14199	0.00633466	0.216594	0.21016	9031/9918/23063/22985/10270/64151/11044/10051/23397/7153/3021/10592/51203/113130/54892/79648/8091/23310/8467/7273/9131/5347/3008/1677/983/387893/8971/3006/3005/23137	30
GO:0031577	spindle checkpoint signaling	30/8285	38/14199	0.00633466	0.216594	0.21016	7756/54908/7175/9319/55743/10403/9183/84861/7272/1063/9587/7517/55795/56984/891/324/55755/51143/472/9184/701/4085/5347/81620/699/55055/348654/9212/9735/51451	30
GO:0018105	peptidyl-serine phosphorylation	179/8285	272/14199	0.00659132	0.221451	0.214874	799/10178/8798/1195/3082/960/5583/7444/5601/57600/65125/28996/5586/5588/5590/6093/5165/375449/1459/815/6196/27330/7037/2011/5743/9175/4140/3320/2932/9706/23139/51701/6790/8550/63967/10044/3326/8317/5594/9647/7443/9252/10110/6789/9770/1457/8312/23678/8767/3551/51231/6795/208/857/6505/7046/5599/22943/6198/10114/1389/1432/11329/7422/7272/5144/1452/11235/7474/1981/5334/4139/11315/4985/85440/10783/791…	179
GO:0071383	cellular response to steroid hormone stimulus	121/8285	179/14199	0.00662411	0.221451	0.214874	8837/7035/2288/23028/1407/672/9604/23376/3670/8611/387/4734/490/9063/1906/79876/5978/7023/23411/3717/10521/2033/655/9325/51366/8725/2692/23081/57178/6198/1655/55325/3312/10728/4848/51389/2908/7337/27086/90/55818/54206/11315/3065/11240/8289/2309/687/2103/51569/7181/1408/11335/5585/56937/23019/5469/6597/6049/7538/7533/3169/9667/9113/5901/9575/84709/1545/2660/9101/2100/3480/11057/9611/4864/10498/625…	121
GO:0051985	negative regulation of chromosome segregation	32/8285	41/14199	0.00662735	0.221451	0.214874	7756/54908/7175/9319/55743/10403/9183/84861/26271/7272/1063/9587/7517/55795/56984/891/324/55755/51143/472/9184/701/4085/5885/5347/81620/699/55055/348654/9212/9735/51451	32
GO:1905819	negative regulation of chromosome separation	32/8285	41/14199	0.00662735	0.221451	0.214874	7756/54908/7175/9319/55743/10403/9183/84861/26271/7272/1063/9587/7517/55795/56984/891/324/55755/51143/472/9184/701/4085/5885/5347/81620/699/55055/348654/9212/9735/51451	32
GO:0007004	telomere maintenance via telomerase	50/8285	68/14199	0.00669328	0.221741	0.215154	4361/5981/11284/5588/23293/7520/3320/4216/8550/3183/3326/5594/9894/80351/54433/10728/10111/54464/10575/4751/6950/25913/54552/1736/6117/7014/55226/3178/10574/79618/7013/85456/472/22948/140609/26272/3192/10694/7203/7015/10576/54386/1499/5394/167227/545/9212/23381/54984/100134934	50
GO:0098727	maintenance of cell number	90/8285	130/14199	0.00671142	0.221741	0.215154	3479/1994/259266/6688/8243/5076/5108/55183/5978/51593/84678/51586/655/79576/79918/5764/2146/23081/657/9126/2648/1656/4848/79923/3280/55818/607/80306/2309/2103/51123/23091/8202/6659/23019/10893/7178/10001/4017/23318/6926/9314/4609/23168/80312/8451/6760/22823/129563/2177/79648/63978/8091/2308/1977/60485/678/53918/9412/3815/6497/2176/10642/9442/6886/23160/25836/56339/123169/1499/84376/3516/6774/1000…	90
GO:0032870	cellular response to hormone stimulus	309/8285	484/14199	0.00690666	0.226917	0.220176	2729/8837/7035/2288/23028/55971/1407/5286/672/9604/23376/3670/1373/9564/1535/5588/8611/5315/387/5590/6093/64710/4734/815/2046/490/6720/5915/9063/2782/1906/634/4208/79876/2932/5978/8648/10890/27131/5829/7023/114882/990/10580/23411/3717/10521/7494/2033/5905/6430/328/655/5251/9325/1512/64397/51366/10270/8725/208/7297/3718/857/2887/1395/2692/2645/23081/23189/57178/6198/1655/4790/2549/55325/3312/10728…	309
GO:0008156	negative regulation of DNA replication	23/8285	28/14199	0.00696677	0.22753	0.220772	3980/23063/54962/990/23560/8914/26271/51053/23244/84083/84893/675/146059/7157/7013/29980/6282/81620/545/64061/641/91603/345643	23
GO:0046605	regulation of centrosome cycle	38/8285	50/14199	0.00705377	0.22753	0.220772	57787/672/284403/7514/25978/51510/6790/23411/128866/4591/2648/56890/8850/51652/7840/9525/6491/7517/27243/9475/55226/55755/22994/10733/79648/55835/163786/54461/221908/91147/85459/153241/10015/348654/100653515/4869/10432/57132	38
GO:1901991	negative regulation of mitotic cell cycle phase transition	107/8285	157/14199	0.00707829	0.22753	0.220772	7756/672/4361/2273/54908/23026/7175/1112/9319/55743/51512/1739/79960/5933/10403/8555/4998/9183/51720/63967/990/51322/84861/25793/79791/5934/4683/51343/2146/80279/595/26271/7272/900/90/60672/25949/1063/6118/5311/10385/9587/7517/55795/56984/27183/891/324/51347/4193/10457/9314/55755/5925/90381/7157/51514/58190/51143/1030/138151/472/1111/8091/678/9184/701/9577/29980/3275/84142/11073/4085/5885/51339/2…	107
GO:0072698	protein localization to microtubule cytoskeleton	40/8285	53/14199	0.00708009	0.22753	0.220772	57787/23386/10615/5108/11043/2932/10464/22924/29887/6790/22919/55125/4281/51104/1855/7272/9419/6491/11190/146057/1729/324/9857/58489/9585/1453/22994/79648/636/3192/27185/10982/84376/2804/51134/64770/10634/283489/9851/137886	40
GO:0008360	regulation of cell shape	93/8285	135/14199	0.00734903	0.234174	0.227218	23221/2534/51177/387/9948/9886/2011/10979/1739/55843/5362/23136/10269/7430/25805/54873/4627/1690/3055/2245/23370/79784/23268/7422/55171/5361/2335/390/103910/989/89846/11135/57464/4289/55558/1729/10810/4628/10154/5879/5962/57619/121512/54509/7168/388/51057/8994/4651/5921/221472/55023/93663/2768/30011/4478/221061/10435/10428/3815/445815/114793/56990/2035/2909/755/3689/91010/54751/10630/10602/22836/…	93
GO:0007063	regulation of sister chromatid cohesion	18/8285	21/14199	0.00737437	0.234174	0.227218	1663/23063/546/10664/9555/6421/55719/84250/5925/113130/55869/286053/5885/1499/2237/8313/699/23137	18
GO:0045786	negative regulation of cell cycle	220/8285	339/14199	0.00740627	0.234174	0.227218	1407/9031/51603/7756/672/4361/2273/54888/54908/23026/64848/7175/57646/1112/2296/23063/3843/7158/5774/6196/9319/55743/5743/54962/51512/1739/79960/9984/5933/10403/8555/546/4998/9183/51720/23368/7023/51776/79968/63967/8318/990/4436/51322/988/23411/25/84861/25793/8563/655/51654/79791/5934/9738/23087/7976/4683/51343/1021/2146/2625/4591/80279/2648/595/27339/56890/8914/26271/1432/51053/51696/7272/900/58…	220
GO:0010833	telomere maintenance via telomere lengthening	57/8285	79/14199	0.00765364	0.23783	0.230766	4361/5981/11284/5888/5588/23293/7520/3320/4216/8550/3183/3326/5594/9894/80351/54433/10728/10111/54464/10575/4751/6950/3181/25913/54552/1736/6117/7014/55226/3178/10574/142/79618/7013/85456/472/22948/140609/26272/3192/10694/7203/7015/10576/54386/1499/5394/167227/545/2072/9212/79008/84464/23381/3104/54984/100134934	57
GO:0006482	protein demethylation	25/8285	31/14199	0.00770851	0.23783	0.230766	23028/3720/9682/23210/5927/84678/54620/3299/23081/55818/10765/7320/51780/8242/23030/7403/54784/84864/221037/23133/22992/7404/55693/5253/51400	25
GO:0008214	protein dealkylation	25/8285	31/14199	0.00770851	0.23783	0.230766	23028/3720/9682/23210/5927/84678/54620/3299/23081/55818/10765/7320/51780/8242/23030/7403/54784/84864/221037/23133/22992/7404/55693/5253/51400	25
GO:0030201	heparan sulfate proteoglycan metabolic process	25/8285	31/14199	0.00770851	0.23783	0.230766	2137/64132/7358/29940/9375/9953/9394/23213/64579/55790/6934/26229/2132/9653/92370/2135/8509/1499/90161/126792/6448/2131/266722/55959/222537	25
GO:0051028	mRNA transport	84/8285	121/14199	0.00772412	0.23783	0.230766	5976/9961/23279/54888/7175/55706/55746/23293/10644/55421/79023/9984/7514/81929/10762/23511/84271/8563/8106/8480/2332/10204/4927/6830/4928/57097/57122/6428/9444/9631/22916/6432/9887/2733/348995/56943/3181/10212/9972/65109/79902/57187/55795/8021/7538/79228/23225/3178/1660/10643/11097/6426/10128/53371/144983/5433/26019/3087/1070/5903/25909/23165/6396/23049/10642/8888/26097/10482/129401/59343/7884/16…	84
GO:0045930	negative regulation of mitotic cell cycle	135/8285	202/14199	0.007869	0.240615	0.233468	7756/672/4361/2273/54908/23026/64848/7175/1112/2296/5774/9319/55743/54962/51512/1739/79960/5933/10403/8555/4998/9183/51720/51776/63967/990/4436/51322/25/84861/25793/655/79791/5934/23087/7976/4683/51343/2146/80279/595/26271/51696/7272/900/79858/90/60672/25949/1063/6118/5311/10385/9587/7517/55795/56984/65975/27183/891/324/51347/4193/10457/3586/9314/55755/5925/90381/10040/7157/51514/2177/58190/51143…	135
GO:0006354	DNA-templated transcription, elongation	55/8285	76/14199	0.00789639	0.240615	0.233468	6924/10771/8621/9984/905/8812/11198/8563/51497/27336/8312/5438/8178/2146/9400/6830/26610/9025/10915/22936/56943/10102/55795/55837/11047/7428/11143/23168/80349/23476/55840/3192/284695/2071/23160/165918/123169/51755/1499/55209/6919/51574/29072/7469/10614/2963/25920/6829/8861/9646/3150/22828/6827/2074/404672	55
GO:0034470	ncRNA processing	259/8285	403/14199	0.00799337	0.242315	0.235117	60528/115939/51096/51106/6301/55596/54888/23517/54802/51602/57602/23369/6894/10885/23536/60487/55623/8518/51095/23016/1653/79670/22894/10269/51729/51593/8602/51637/339175/8886/22803/51575/16/54517/26523/23481/10521/51493/55687/8846/23405/9692/51654/5303/26512/123263/56986/55756/55174/90459/10775/6217/6223/26024/51010/10360/23560/57508/117246/55813/1655/54433/26610/83480/11103/4839/23195/705/29102…	259
GO:0016050	vesicle organization	184/8285	281/14199	0.00803679	0.242381	0.235182	27072/5048/79090/8938/51534/8452/55300/9765/11063/84062/9341/84067/9892/6857/8907/8301/7251/7879/25956/5289/56681/8417/25978/2060/51510/29887/10959/5990/8773/29911/9342/89781/10490/10484/10483/128866/9218/8411/80183/51201/55353/8677/84079/208/2901/10282/857/8976/1759/3257/8729/9570/9527/83871/1182/23603/2054/84519/9847/26271/8724/64083/10802/10342/22937/51652/6382/149371/59349/8934/1385/51552/952…	184
GO:0006399	tRNA metabolic process	123/8285	183/14199	0.00825473	0.247479	0.240128	60528/6301/54888/54802/6894/23536/60487/55623/55699/8518/51095/23016/2975/1653/51637/339175/16/54517/51493/55687/8846/23405/9692/51654/124454/123263/56986/10775/2617/26024/51010/26610/83480/6897/5917/2976/1615/63892/10056/10352/55157/9330/11340/81627/54482/79828/57505/10799/9329/57570/64172/84705/23404/57470/2926/51520/55140/25917/4677/54522/8565/79587/25821/55226/2058/79731/91801/80745/6741/5106…	123
GO:1903320	regulation of protein modification by small protein conjugation or removal	156/8285	236/14199	0.00841177	0.247479	0.240128	2729/23028/23077/1407/6224/83932/2534/672/23376/330/8554/8452/54165/3309/5601/9474/11338/9759/55743/83737/5663/3320/8555/55100/3301/10075/825/3326/25/23551/9978/3091/5716/54602/9683/8312/7329/9810/8767/51366/51343/857/3984/7046/23560/57178/5414/80279/23142/7466/329/23328/26271/9532/6500/7337/7375/868/6209/2034/11315/10625/84930/6125/25950/9111/6659/9349/10054/5582/54552/80758/80762/6737/29979/102…	156
GO:0099173	postsynapse organization	99/8285	145/14199	0.00864022	0.247479	0.240128	9912/5048/6792/2534/27067/84062/816/25791/55737/87/60/1739/5063/4983/8898/4897/8829/1399/9463/5641/51201/8976/51104/1855/2743/3312/9379/23316/7337/7474/85461/2043/23184/8828/9419/5552/547/1742/2045/4076/58489/3706/102/10097/22891/10152/8499/3480/4916/375/66000/26045/80728/9118/22866/23657/2895/9456/10160/5789/2047/51738/7804/11079/10163/100528062/23181/84885/22941/10611/382/5913/378/2339/2668/228…	99
GO:0006607	NLS-bearing protein import into nucleus	15/8285	17/14199	0.00865257	0.247479	0.240128	23633/3843/3839/3837/3836/868/53371/653489/5903/129401/727851/3838/3840/285190/3841	15
GO:0034390	smooth muscle cell apoptotic process	15/8285	17/14199	0.00865257	0.247479	0.240128	3479/6416/1906/23411/1871/9927/468/1786/5468/409/1029/27250/3592/205428/8241	15
GO:0034391	regulation of smooth muscle cell apoptotic process	15/8285	17/14199	0.00865257	0.247479	0.240128	3479/6416/1906/23411/1871/9927/468/1786/5468/409/1029/27250/3592/205428/8241	15
GO:0097164	ammonium ion metabolic process	15/8285	17/14199	0.00865257	0.247479	0.240128	55349/23446/217/590/7166/1644/29958/121278/6715/3176/285671/133121/501/538/114781	15
GO:0048588	developmental cell growth	136/8285	204/14199	0.00869407	0.247479	0.240128	51265/5048/6792/9043/7869/3479/22902/7414/23327/23105/26999/9423/57609/5590/6857/9175/10371/10512/4133/1906/22999/3320/54437/2932/9706/6790/9962/393/5459/4897/57556/1808/3326/25/8829/51199/23394/51760/5802/59284/23242/3984/9355/6456/1855/6387/5532/1982/8437/8936/7422/9037/7474/5361/150465/3676/57142/2335/8828/53335/63923/148/8239/57699/51299/23769/23499/6049/440275/10038/2258/23025/10439/55558/92…	136
GO:0007094	mitotic spindle assembly checkpoint signaling	29/8285	37/14199	0.00871077	0.247479	0.240128	7756/54908/7175/9319/10403/9183/84861/7272/1063/9587/7517/55795/56984/891/324/55755/51143/472/9184/701/4085/5347/81620/699/55055/348654/9212/9735/51451	29
GO:0071173	spindle assembly checkpoint signaling	29/8285	37/14199	0.00871077	0.247479	0.240128	7756/54908/7175/9319/10403/9183/84861/7272/1063/9587/7517/55795/56984/891/324/55755/51143/472/9184/701/4085/5347/81620/699/55055/348654/9212/9735/51451	29
GO:0071174	mitotic spindle checkpoint signaling	29/8285	37/14199	0.00871077	0.247479	0.240128	7756/54908/7175/9319/10403/9183/84861/7272/1063/9587/7517/55795/56984/891/324/55755/51143/472/9184/701/4085/5347/81620/699/55055/348654/9212/9735/51451	29
GO:1902275	regulation of chromatin organization	29/8285	37/14199	0.00871077	0.247479	0.240128	23028/7175/9739/64863/5290/1786/22880/51535/83852/80312/9869/4288/6749/3192/134353/54784/23272/80063/55209/25942/55729/4300/23133/55196/353274/54737/5253/9646/84456	29
GO:0070129	regulation of mitochondrial translation	20/8285	24/14199	0.00881785	0.248846	0.241454	8846/26164/51654/708/23107/10102/79072/51204/84300/10128/92170/55005/115416/285367/26995/54931/63899/51335/28958/81554	20
GO:0048511	rhythmic process	167/8285	254/14199	0.00891931	0.248846	0.241454	4800/1387/23077/26224/1407/56938/3309/8863/5601/9967/6095/6720/23291/5927/4791/23239/2932/10075/10059/7042/1390/23411/402055/2033/23394/1457/5971/268/1628/10135/5764/2692/2146/23064/5599/59338/10743/6532/1655/4669/3131/5608/4192/8914/4988/83594/7337/8850/3398/3065/6421/10765/4297/1385/2309/687/7043/55068/23435/55269/1408/11335/7291/8239/8242/5582/135/468/7153/5468/10514/1644/5111/5158/8553/9475/9…	167
GO:0009896	positive regulation of catabolic process	308/8285	484/14199	0.00896928	0.248846	0.241454	2729/54467/5976/114881/7812/51099/5286/1634/51667/9604/23376/3479/23034/6642/8554/25897/55187/23327/5601/5291/54542/8975/4904/4287/6093/55737/4734/26986/28951/55743/7879/23016/23609/4292/51548/4898/57690/83737/8671/27244/11043/5663/3320/4036/2932/79670/9706/22894/57531/10075/5705/6790/10558/27327/25831/7430/51322/23411/51100/51257/9681/25793/9567/25807/3162/23112/27352/9978/9517/3091/1457/5716/14…	308
GO:0033046	negative regulation of sister chromatid segregation	31/8285	40/14199	0.00901278	0.248846	0.241454	7756/54908/7175/9319/10403/9183/84861/26271/7272/1063/9587/7517/55795/56984/891/324/55755/51143/472/9184/701/4085/5885/5347/81620/699/55055/348654/9212/9735/51451	31
GO:0033048	negative regulation of mitotic sister chromatid segregation	31/8285	40/14199	0.00901278	0.248846	0.241454	7756/54908/7175/9319/10403/9183/84861/26271/7272/1063/9587/7517/55795/56984/891/324/55755/51143/472/9184/701/4085/5885/5347/81620/699/55055/348654/9212/9735/51451	31
GO:2000816	negative regulation of mitotic sister chromatid separation	31/8285	40/14199	0.00901278	0.248846	0.241454	7756/54908/7175/9319/10403/9183/84861/26271/7272/1063/9587/7517/55795/56984/891/324/55755/51143/472/9184/701/4085/5885/5347/81620/699/55055/348654/9212/9735/51451	31
GO:0016570	histone modification	297/8285	466/14199	0.00906143	0.24902	0.241623	4800/23028/1387/55904/3720/10157/9031/54799/672/23376/3670/23304/51230/7444/5926/26009/51742/57602/58508/54969/9474/57504/93166/6873/2139/9682/6688/9759/23210/54556/53615/6720/5927/60/11176/51548/79960/7319/55183/10847/55100/7994/10269/5978/8648/546/2122/10075/51720/6790/1789/84678/51322/23411/3717/54620/9739/9647/2033/23774/7443/9252/6907/5931/2332/9767/55578/3299/10664/79918/84148/9810/51366/51…	297
GO:0006368	transcription elongation from RNA polymerase II promoter	43/8285	58/14199	0.0091148	0.249322	0.241916	6924/10771/8621/8812/11198/51497/8312/5438/8178/2146/9400/6830/26610/9025/10915/22936/56943/55795/55837/11047/7428/23168/80349/23476/55840/3192/2071/23160/165918/123169/51755/1499/51574/29072/7469/10614/2963/25920/6829/8861/9646/6827/2074	43
GO:0009126	purine nucleoside monophosphate metabolic process	33/8285	43/14199	0.00920821	0.249555	0.242143	204/159/1739/22978/260425/5634/3614/203/1716/271/84618/9414/30833/10606/4354/272/4907/471/8573/50808/1740/221264/136332/132/1633/7498/8833/318/3251/3615/122622/100/158	33
GO:0044786	cell cycle DNA replication	33/8285	43/14199	0.00920821	0.249555	0.242143	5976/10926/5888/54962/4175/10269/546/8318/8317/9837/5422/4173/3978/26271/4172/51053/54617/7014/5111/1763/675/7013/29980/80174/59343/7486/81620/2237/79915/64785/641/91603/1602	33
GO:0010498	proteasomal protein catabolic process	303/8285	476/14199	0.00927521	0.249745	0.242326	2729/54467/996/26224/114881/5689/54476/51667/9604/23376/25937/23304/8554/25897/11345/8452/5685/3309/1161/23327/51528/5601/29945/8454/8975/10513/4287/27248/4734/6400/28951/55743/23291/23609/27252/54431/51548/7319/27074/3093/83737/4983/5663/57092/2932/7514/57531/10075/5705/6790/55741/111089941/51433/10296/25831/117584/51322/3326/23411/5714/54620/84861/84164/80020/9978/27351/114088/5684/5687/26133/5…	303
GO:1902036	regulation of hematopoietic stem cell differentiation	8285-12-01	13/14199	0.0093174	0.249745	0.242326	2296/5610/83737/54517/25/9739/1021/3313/56339/51441/10443/5591	12
GO:0031570	DNA integrity checkpoint signaling	83/8285	120/14199	0.0093426	0.249745	0.242326	1407/672/4361/57646/1112/7158/54962/51512/9984/8555/4998/51720/51776/79968/63967/8318/990/4436/51322/988/8563/79791/4683/51343/80279/595/27339/8914/1432/900/5810/79858/26270/25949/6118/440275/65975/9575/51347/4193/79621/83990/1763/8451/90381/7157/261726/51514/25896/54465/2177/472/1111/8091/144715/26272/7508/146956/9577/29980/84142/11073/5347/81620/55159/10116/8738/983/5883/545/5781/11200/51065/79…	83
GO:0051656	establishment of organelle localization	237/8285	368/14199	0.00943442	0.251058	0.243601	5048/83930/6683/55166/9846/55773/8452/54908/5874/84062/57102/4134/23224/9423/9892/5590/10947/23291/3993/8301/23332/7251/1739/7879/4292/10615/4133/5108/56681/5663/10403/7514/10464/25978/3797/81929/51510/10959/7462/9183/29058/10726/8773/7430/9342/25777/3162/4627/3091/9321/9371/128866/51566/55512/8120/8976/10652/1759/7016/8729/57584/3837/4927/64149/867/8936/84100/11235/10342/8723/150465/10096/3676/6…	237
GO:0019827	stem cell population maintenance	88/8285	128/14199	0.0097262	0.256501	0.248882	1994/259266/6688/8243/5076/5108/55183/5978/51593/84678/51586/655/79576/79918/5764/23081/657/9126/2648/1656/4848/79923/3280/55818/607/80306/2309/2103/51123/23091/8202/6659/23019/10893/7178/10001/4017/23318/6926/9314/4609/23168/80312/8451/6760/22823/129563/2177/79648/63978/8091/2308/1977/60485/678/53918/9412/3815/6497/2176/10642/9442/6886/23160/25836/56339/123169/1499/84376/3516/6774/1000/81603/847…	88
GO:0045727	positive regulation of translation	88/8285	128/14199	0.0097262	0.256501	0.248882	7812/23034/7431/8531/4904/1994/5315/54505/387/26986/5337/1153/84271/51654/2332/5935/5611/22849/23185/6198/708/1982/11044/23107/8087/1981/23178/10657/6125/27161/79072/6659/65109/440275/1968/22927/10492/55226/1660/116496/84300/7057/1545/29081/3184/55132/10140/9775/343472/5433/8893/54915/8872/60558/127933/3192/55364/55005/10600/285367/4690/10642/113251/56339/26995/1938/5436/29063/65110/7555/84305/10…	88
GO:0048675	axon extension	79/8285	114/14199	0.0102766	0.268002	0.260041	51265/5048/6792/7869/22902/7414/9423/57609/9175/10371/10512/4133/1906/3320/54437/2932/9706/393/5459/4897/57556/1808/3326/25/8829/23394/5802/3984/9355/1855/6387/5532/1982/7422/9037/7474/150465/57142/2335/8828/8239/23499/6049/10439/55558/9201/10505/9856/80031/343472/2803/9353/203228/3688/1909/223117/118813/26053/27185/4825/81565/57611/25942/214/9723/65059/29882/8851/8408/6586/6585/57698/10507/54413…	79
GO:0000380	alternative mRNA splicing, via spliceosome	52/8285	72/14199	0.010299	0.268002	0.260041	10181/23028/11171/10659/9967/6433/8621/10179/55796/54715/5978/4670/10521/56853/2332/1655/8683/83989/8087/6421/58517/10657/84081/10656/84991/84872/3178/1660/6426/6434/10150/4857/60677/10658/10284/4154/3192/135295/4116/55225/64783/79005/10569/146713/5936/51319/51341/8241/54033/10921/29890/9939	52
GO:2000573	positive regulation of DNA biosynthetic process	52/8285	72/14199	0.010299	0.268002	0.260041	3082/11284/5982/5588/5063/7520/3320/79977/4216/50507/8550/3326/5594/9837/80351/10728/5985/64094/10575/4751/6950/63922/25913/1736/5111/5983/3178/10574/9314/4609/1545/2247/409/4931/79618/84296/472/22948/140609/26272/10694/2264/7203/5984/10576/1499/54921/25849/545/9212/64785/11232	52
GO:0006278	RNA-templated DNA biosynthetic process	50/8285	69/14199	0.010627	0.275319	0.267141	4361/5981/11284/5588/23293/7520/3320/4216/8550/3183/3326/5594/9894/80351/54433/10728/10111/54464/10575/4751/6950/25913/54552/1736/6117/7014/55226/3178/10574/79618/7013/85456/472/22948/140609/26272/3192/10694/7203/7015/10576/54386/1499/5394/167227/545/9212/23381/54984/100134934	50
GO:0016571	histone methylation	101/8285	149/14199	0.0110043	0.283842	0.275411	4800/23028/1387/55904/3720/10157/672/51230/5926/51742/58508/93166/9682/55183/546/2122/1789/23411/9739/10664/79918/84148/2146/23081/2625/2145/6830/7468/51111/11108/56341/59336/9555/55683/55818/55870/7799/6018/4297/1786/23378/54496/84787/11137/83852/23168/80312/11107/54934/23067/80349/4089/23476/10498/63976/22823/9869/56950/80854/7403/8473/54904/63978/28989/79723/56254/29104/22976/26053/3275/26097/…	101
GO:0031929	TOR signaling	82/8285	119/14199	0.0112639	0.289272	0.280679	23304/58528/23274/1497/6098/55593/27244/10269/81929/8550/117584/51322/23411/84861/9681/3091/9894/9675/79726/6009/2625/6198/8649/55846/26268/7957/64083/10641/55704/79109/5290/3071/84219/23677/51520/79899/55654/6194/84803/57521/207/261726/8444/1609/93627/51256/107080638/2768/203228/1979/143686/472/64798/6396/23049/197131/23387/5563/27185/256471/253260/154743/54468/7248/90809/23251/94056/4534/56834/…	82
GO:0032204	regulation of telomere maintenance	57/8285	80/14199	0.0116071	0.296723	0.287909	5976/2067/4361/11284/5588/23293/7515/51548/7520/546/4216/8550/3183/5594/4683/80351/10111/54464/10575/4751/56252/6950/3181/25913/54552/1736/7014/55226/3178/10574/4609/3184/142/55869/79618/7013/472/22948/140609/26272/3192/10694/23049/7203/10576/54386/1499/5394/167227/545/2072/9212/79008/84464/23381/54984/100134934	57
GO:0006275	regulation of DNA replication	87/8285	127/14199	0.011655	0.296723	0.287909	3980/10926/5982/23063/64710/2736/54962/79960/10269/546/990/8317/9837/79913/64863/9767/4683/5518/23560/9126/7126/2735/5985/8914/26271/51053/5515/55704/23244/84083/5930/466/56897/63922/54617/26057/5111/5983/23175/84893/23595/1660/57695/11143/8412/1763/1950/675/146059/90381/114799/7157/890/1956/84296/7013/25792/8467/10361/29980/80174/6282/64769/59343/5984/5001/81620/84289/54921/283899/983/4798/15757…	87
GO:2001222	regulation of neuron migration	30/8285	39/14199	0.0121837	0.304287	0.295248	340533/816/815/10371/284403/57556/79791/9693/4192/221692/63923/153090/9585/2796/285313/137970/3084/22854/4825/25836/26012/54986/6774/653464/23060/54328/23768/57698/5649/9860	30
GO:0090329	regulation of DNA-templated DNA replication	38/8285	51/14199	0.0121929	0.304287	0.295248	3980/10926/5982/54962/10269/546/8317/9837/64863/4683/5985/8914/26271/51053/84083/56897/63922/54617/5111/5983/84893/11143/675/90381/84296/25792/29980/80174/59343/5984/81620/54921/64785/641/91603/345643/11232/1602	38
GO:0051783	regulation of nuclear division	85/8285	124/14199	0.0122511	0.304287	0.295248	996/7756/3479/8452/54908/9820/7175/29945/8621/6196/9319/1906/10403/9183/6790/51433/84861/655/55512/51343/3209/2253/10635/26271/23113/7272/5810/7474/4751/1063/7320/23363/9587/7517/55795/9787/9088/56984/8881/891/324/55755/1761/51203/9585/1950/5925/10040/51143/55023/4288/472/1111/9184/286151/286053/701/995/10361/54461/4487/4085/5885/5347/81620/1613/83987/699/3643/27085/5139/55055/146691/54998/348654…	85
GO:1901361	organic cyclic compound catabolic process	280/8285	440/14199	0.0122768	0.304287	0.295248	22875/23098/5976/60528/7812/23034/51071/1244/8630/7431/8635/55596/54888/23644/23517/9967/954/23369/54542/10758/8531/4904/1994/6093/4129/23293/26986/949/5151/38/23016/10179/4292/22978/57690/26002/79670/22894/51171/22803/2521/8761/27327/3183/26523/1312/11332/1153/4670/27443/51733/9567/3162/23112/23405/79882/328/25939/2332/23417/2935/23475/2184/50804/259307/59284/1777/56006/4521/23658/644/51010/2284…	280
GO:0051653	spindle localization	36/8285	48/14199	0.0123148	0.304287	0.295248	5048/54908/4134/259266/23291/3993/23332/10403/9183/4627/8976/3837/10096/3834/3996/56907/10253/55755/51203/10097/6993/79648/3688/2697/56776/23122/10252/4085/81565/5347/1072/89958/1778/3064/84501/137886	36
GO:0061647	histone H3-K9 modification	36/8285	48/14199	0.0123148	0.304287	0.295248	23028/3720/672/5926/51742/9682/51548/55183/546/2122/1789/23411/23081/2625/26036/8850/55818/55870/4297/1786/83852/11107/4089/63976/9869/80854/1111/79723/200186/55209/4204/10782/57673/79813/55693/5079	36
GO:1990090	cellular response to nerve growth factor stimulus	32/8285	42/14199	0.0123292	0.304287	0.295248	3309/11075/2889/6456/2648/9693/867/11021/8936/7337/3280/23527/5906/2309/6272/57498/1783/9101/4916/9775/1453/351/207/66000/4915/382/1398/627/10519/9863/7442/4914	32
GO:0010824	regulation of centrosome duplication	34/8285	45/14199	0.012366	0.304287	0.295248	672/7514/25978/51510/23411/128866/4591/2648/56890/8850/51652/7840/9525/6491/7517/27243/9475/55226/55755/22994/10733/55835/163786/54461/221908/91147/85459/153241/10015/348654/100653515/4869/10432/57132	34
GO:0010770	positive regulation of cell morphogenesis involved in differentiation	53/8285	74/14199	0.0125208	0.306812	0.297698	51265/5048/6792/27067/9820/816/55679/10979/5063/55604/57091/25/8829/1399/11078/8874/79791/84079/7016/708/4192/23316/10675/2043/335/23363/57580/6239/4076/5879/56965/3706/10097/80005/1793/5789/7804/100528062/10109/1398/5881/3987/26259/29882/811/10519/5034/5649/2316/6281/80823/5591/1523	53
GO:0000209	protein polyubiquitination	153/8285	233/14199	0.0127158	0.310298	0.301081	54467/996/9690/54476/672/9604/25897/8452/1161/23327/29945/8454/54542/10758/865/4734/55743/23291/23609/27252/7319/3093/83737/51619/57531/10075/51433/25831/117584/23759/9978/54941/8312/9810/55284/51366/51343/54926/80351/64750/26118/7323/27339/10612/329/867/55626/23328/9025/4012/6500/7337/127544/90025/81847/7320/8405/11059/9111/164781/55905/10616/6049/8881/7187/7322/6737/7326/23608/1643/7174/4193/14…	153
GO:0031023	microtubule organizing center organization	95/8285	140/14199	0.0128268	0.311713	0.302454	57787/5048/672/54875/4659/23291/23332/51175/284403/23032/5108/10403/7514/25978/51510/6790/23411/5902/51199/9371/128866/55125/9738/22995/8777/4591/2648/56890/8850/51652/7840/117178/4751/5311/9525/6491/84612/3834/11190/7517/2302/151648/27243/11127/10207/9475/22873/55226/9648/4957/55755/55142/3832/675/54828/22994/10733/79648/54801/1111/55835/115106/1070/163786/54461/221908/23122/79884/80817/91147/85…	95
GO:0000375	RNA splicing, via transesterification reactions	193/8285	298/14199	0.0129988	0.314593	0.305249	10181/23028/10180/6936/55692/9716/11171/55596/23517/10659/9967/6433/11338/8621/1659/27238/23210/26986/26528/1207/10179/55094/55796/6626/54715/1653/25929/10450/5978/51729/55696/10992/55285/3183/8487/55280/6732/988/3189/1153/4670/10521/84844/55147/6430/5411/24148/51340/56853/2332/27336/5935/8175/55702/23658/23064/22794/708/1655/51747/9343/3312/27339/4928/25766/55110/8683/6428/9444/8899/83989/23398/…	193
GO:0060216	definitive hemopoiesis	14/8285	16/14199	0.0132414	0.316557	0.307154	865/7049/80279/3213/4211/678/103/6886/6670/2624/161882/3214/613/8076	14
GO:1903541	regulation of exosomal secretion	14/8285	16/14199	0.0132414	0.316557	0.307154	7251/7879/55512/6382/9525/27243/27183/8027/6386/11267/23400/10015/5071/9146	14
GO:2001224	positive regulation of neuron migration	14/8285	16/14199	0.0132414	0.316557	0.307154	10371/284403/57556/79791/9693/4192/153090/9585/25836/26012/653464/23060/57698/5649	14
GO:0034504	protein localization to nucleus	180/8285	277/14199	0.0133667	0.318257	0.308803	26022/2534/25937/23633/999/1495/7175/10758/55726/23534/3843/1994/25885/55746/7037/10979/5743/5663/2932/7514/2646/51194/55696/57506/114882/10762/23511/3326/3717/25777/5905/4792/6789/655/55612/2254/3839/10204/23568/6788/51366/30000/10049/2737/7016/1855/51684/3837/80279/4927/7704/4928/57122/1432/51715/1871/705/6500/9631/3836/1894/868/10575/7341/11315/6950/51569/23435/1408/1434/9972/79902/5469/9349/8…	180
GO:0010569	regulation of double-strand break repair via homologous recombination	49/8285	68/14199	0.0134426	0.318774	0.309305	23028/54799/5888/10721/7158/54556/60/51548/55183/2521/23347/9400/10635/8914/10902/6118/80314/54537/9643/92797/8089/63979/56154/84893/26122/10097/22891/23126/142/1111/5531/64210/151987/64769/115004/23514/54386/84717/80311/116028/8607/64110/2187/29072/57634/55010/10933/196528/2074	49
GO:0032200	telomere organization	103/8285	153/14199	0.0138047	0.325628	0.315955	5976/2067/4361/5981/11284/5888/5588/23293/7515/51548/7520/55183/3320/546/4216/8550/3183/3326/5594/9894/328/4683/6119/2146/80351/5889/2145/54433/10728/10111/54464/10575/4751/6118/56252/6950/3181/7517/25913/54552/1736/6117/3021/7014/5111/55226/3178/10574/4609/22891/1763/3184/675/142/51002/55869/79618/7013/85456/472/22948/140609/152485/26272/64421/3192/10694/286053/23049/8365/554313/9401/79677/7203/…	103
GO:0051781	positive regulation of cell division	47/8285	65/14199	0.0138977	0.325628	0.315955	26073/6683/8452/5586/4904/2263/387/8556/8555/7042/990/9371/2254/79848/6795/5764/2253/4192/7422/7060/1894/9928/9270/7043/847/9493/9585/2247/2252/3480/64762/84432/8502/56034/7424/29127/6886/2277/201161/4824/7564/80310/5581/9212/6840/5154/81606	47
GO:1902369	negative regulation of RNA catabolic process	47/8285	65/14199	0.0138977	0.325628	0.315955	7812/54888/9967/10758/8531/4904/1994/26986/2521/3183/1153/2332/23185/1432/11044/81892/55051/23435/51538/79066/7538/1736/9704/10492/1660/10128/3184/10140/25819/51594/3192/10642/9261/167153/51808/2668/8313/10605/90806/10949/8241/54855/11187/56478/79048/3182/373863	47
GO:0006517	protein deglycosylation	21/8285	26/14199	0.0141384	0.328648	0.318886	55741/111089941/55757/4121/4124/11315/80267/57134/9695/56886/91445/10299/55768/267/64772/11236/11253/4122/10905/10724/7844	21
GO:0034067	protein localization to Golgi apparatus	21/8285	26/14199	0.0141384	0.328648	0.318886	55187/10139/8729/90410/64083/400/23363/54832/9648/6653/1453/26225/152559/221079/91949/10972/83452/55690/5870/2580/23230	21
GO:0140053	mitochondrial gene expression	72/8285	104/14199	0.0143657	0.332617	0.322737	60528/51106/54802/64951/55699/51095/4528/8846/9692/26164/51654/64863/124454/2617/56652/7019/708/54516/23107/10352/55157/2309/9617/80298/219402/130916/51116/10102/79072/57505/51081/57570/7978/55037/25821/65080/51204/57129/84300/87178/10128/79675/51067/80222/57038/28957/92170/55005/6832/115416/285367/54948/26995/3396/85476/3035/55006/84275/78988/54931/80324/63899/7284/64963/51021/51335/28958/60493/…	72
GO:0034770	histone H4-K20 methylation	8285-11-01	12/14199	0.0148667	0.340199	0.330094	672/5926/51742/7468/51111/84787/11137/64324/57673/387893/54093	11
GO:0051639	actin filament network formation	8285-11-01	12/14199	0.0148667	0.340199	0.330094	87/55604/5358/23242/5357/56907/80206/29109/3936/146206/84501	11
GO:1900152	negative regulation of nuclear-transcribed mRNA catabolic process, deadenylation-dependent decay	8285-11-01	12/14199	0.0148667	0.340199	0.330094	7812/4904/26986/11044/10492/1660/3184/10140/3192/10642/10605	11
GO:0000077	DNA damage checkpoint signaling	77/8285	112/14199	0.0149549	0.340891	0.330766	1407/672/4361/57646/1112/7158/54962/51512/9984/8555/51720/51776/79968/63967/4436/51322/988/8563/79791/4683/51343/80279/595/27339/1432/900/5810/79858/26270/25949/6118/440275/65975/9575/51347/4193/79621/83990/8451/90381/7157/261726/51514/25896/54465/2177/472/1111/8091/144715/26272/7508/146956/9577/29980/84142/11073/5347/55159/10116/8738/983/5883/545/5781/11200/51065/79184/3014/135458/641/197342/916…	77
GO:1901796	regulation of signal transduction by p53 class mediator	70/8285	101/14199	0.0150772	0.341707	0.331557	23028/6224/960/50484/28996/7994/10269/6790/8550/117584/23411/2033/5716/55702/80279/1655/5608/4839/51147/6209/6125/7291/8805/6615/6659/9521/9349/8445/4193/9816/64844/4609/8533/7157/5366/207/6135/8444/56950/6167/6872/472/1111/22925/133383/1859/4487/3190/90809/161742/7314/80196/596/6201/545/79915/3090/4291/9212/29035/754/11200/387893/5071/10614/51616/84154/200734/2475/23246	70
GO:0016577	histone demethylation	23/8285	29/14199	0.0151069	0.341707	0.331557	23028/3720/9682/23210/5927/84678/54620/3299/23081/55818/10765/7320/51780/8242/23030/7403/84864/221037/23133/22992/7404/55693/5253	23
GO:0031503	protein-containing complex localization	99/8285	147/14199	0.015314	0.343844	0.333631	2288/9912/8100/27067/55706/5590/56850/55737/1739/2239/5108/4983/8417/11158/7514/81929/332/7430/80173/11020/51098/9371/59284/79989/8976/6505/4927/90410/4117/22858/55081/6209/5906/6421/117178/56912/57539/89891/112752/3208/79809/23096/1948/55112/10142/3092/5901/1742/7014/22873/167691/84946/102/26160/51626/403/22994/59283/5899/7013/138151/472/1740/3192/201134/23426/27020/150082/57728/160622/9903/5130…	99
GO:0000377	RNA splicing, via transesterification reactions with bulged adenosine as nucleophile	190/8285	294/14199	0.0153768	0.343844	0.333631	10181/23028/10180/6936/55692/9716/11171/55596/23517/10659/9967/6433/11338/8621/1659/27238/23210/26986/26528/1207/10179/55094/55796/6626/54715/1653/25929/10450/5978/51729/55696/10992/55285/3183/8487/55280/6732/988/3189/1153/4670/10521/84844/55147/6430/5411/24148/51340/56853/2332/27336/5935/8175/55702/23658/23064/22794/708/1655/51747/9343/3312/27339/4928/25766/55110/8683/6428/9444/8899/83989/23398/…	190
GO:0000398	mRNA splicing, via spliceosome	190/8285	294/14199	0.0153768	0.343844	0.333631	10181/23028/10180/6936/55692/9716/11171/55596/23517/10659/9967/6433/11338/8621/1659/27238/23210/26986/26528/1207/10179/55094/55796/6626/54715/1653/25929/10450/5978/51729/55696/10992/55285/3183/8487/55280/6732/988/3189/1153/4670/10521/84844/55147/6430/5411/24148/51340/56853/2332/27336/5935/8175/55702/23658/23064/22794/708/1655/51747/9343/3312/27339/4928/25766/55110/8683/6428/9444/8899/83989/23398/…	190
GO:1900024	regulation of substrate adhesion-dependent cell spreading	39/8285	53/14199	0.0155451	0.344983	0.334736	55679/10979/6480/2192/55604/57091/25/8829/1399/11078/8874/23189/7016/708/4192/23603/10675/335/9270/57580/6239/5879/55435/80005/1793/10630/10109/4241/1398/5747/5881/3987/253725/811/1946/10519/5034/2316/6281	39
GO:1902373	negative regulation of mRNA catabolic process	39/8285	53/14199	0.0155451	0.344983	0.334736	7812/9967/10758/8531/4904/1994/26986/2521/3183/1153/2332/23185/1432/11044/23435/79066/7538/9704/10492/1660/3184/10140/25819/51594/3192/10642/9261/2668/8313/10605/90806/10949/8241/54855/11187/56478/79048/3182/373863	39
GO:0048813	dendrite morphogenesis	87/8285	128/14199	0.0157478	0.347191	0.336878	23098/9912/51265/5048/6792/23542/2534/27067/9820/80243/84062/23327/816/11178/25791/4205/4734/8301/10371/5063/4133/1136/2932/8829/79791/84079/5764/8976/54664/1855/9693/23316/221692/7337/2043/8609/23363/5911/7533/547/25830/1742/22903/9201/57498/577/4076/10006/56965/3706/10097/22891/57520/10152/8499/50488/473/51473/7436/3688/10160/5789/23043/2047/7804/100528062/10642/23181/10611/3251/26012/6383/2287…	87
GO:0071539	protein localization to centrosome	25/8285	32/14199	0.0157626	0.347191	0.336878	57787/23386/10615/5108/2932/10464/29887/6790/22919/55125/6491/11190/324/9857/1453/22994/79648/636/27185/84376/2804/51134/64770/9851/137886	25
GO:0032785	negative regulation of DNA-templated transcription, elongation	16/8285	19/14199	0.0162324	0.354754	0.344217	51497/8312/2146/9400/9025/10915/55837/7428/3192/165918/51574/7469/10614/25920/6829/6827	16
GO:0002200	somatic diversification of immune receptors	50/8285	70/14199	0.0162889	0.354754	0.344217	2067/10721/7158/5423/6929/7037/4292/9984/55183/6932/4436/25939/4683/51010/6830/7468/51111/9025/4437/2956/7292/54537/5395/78996/64919/80762/56259/84787/23075/3586/121260/3329/9730/472/7518/64421/22976/8888/103/165918/3148/27343/5896/200558/9156/3981/79915/56941/118460/5591	50
GO:0030866	cortical actin cytoskeleton organization	29/8285	38/14199	0.0163671	0.354754	0.344217	54443/11215/10787/6093/3993/1739/2037/23136/7430/3551/1894/5357/3071/3996/27183/9475/80206/29109/3936/7094/85369/114793/2035/91010/29127/382/10015/5339/811	29
GO:0009167	purine ribonucleoside monophosphate metabolic process	31/8285	41/14199	0.0164076	0.354754	0.344217	204/159/1739/22978/260425/5634/3614/203/271/84618/9414/30833/10606/4354/272/4907/471/8573/50808/1740/221264/136332/132/7498/8833/318/3251/3615/122622/100/158	31
GO:0030521	androgen receptor signaling pathway	31/8285	41/14199	0.0164076	0.354754	0.344217	2288/23028/9604/8611/387/9063/23411/10521/2033/23081/57178/1655/51389/7337/27086/55818/11315/3065/8289/5585/56937/6597/6049/9667/9611/7110/3275/4824/5245/51341/9612	31
GO:0031398	positive regulation of protein ubiquitination	78/8285	114/14199	0.0170581	0.36581	0.354944	23028/23077/1407/83932/672/330/8452/54165/3309/5601/55743/8555/10075/9978/5716/54602/8312/9810/8767/51343/857/5414/80279/23142/7466/329/6500/7337/868/84930/9111/80762/29979/64844/79139/84259/144165/55215/8915/6502/51256/107080638/55208/26272/284/56254/22976/54778/7805/25898/59343/285671/254170/8945/54838/5347/648/11170/7336/7314/10892/150684/11065/7189/7334/9112/754/5071/7332/57697/120892/57162/1…	78
GO:0009755	hormone-mediated signaling pathway	105/8285	157/14199	0.0170792	0.36581	0.354944	2288/23028/1407/672/9604/23376/3670/8611/387/4734/5915/9063/79876/8648/23411/3717/10521/2033/655/9325/51366/1395/2692/23081/57178/1655/55325/10728/4848/51389/2690/2908/7337/27086/55818/11315/3065/2494/11240/8289/2103/51569/7181/1408/5585/56937/23019/5469/7067/6597/6049/7533/3169/9667/9113/5914/5468/55915/9575/55198/2516/5547/6751/2100/11057/9611/10498/6258/142/9125/7110/6502/1393/26524/7068/4306/…	105
GO:0031397	negative regulation of protein ubiquitination	57/8285	81/14199	0.0171055	0.36581	0.354944	2729/1407/6224/2534/23376/9474/11338/5663/3301/25/9683/51366/857/3984/23560/26271/9532/7375/6209/11315/10625/6125/6659/9349/5582/54552/80758/10253/64844/409/207/6135/6167/55869/6872/8473/6188/9320/9184/153769/701/59343/4085/819/9529/54765/64359/23251/5581/6201/143941/11146/374969/575/10196/9636/54984	57
GO:0043401	steroid hormone mediated signaling pathway	83/8285	122/14199	0.0174556	0.371943	0.360895	2288/23028/1407/672/9604/23376/3670/8611/387/4734/9063/79876/23411/3717/10521/2033/655/9325/51366/2692/23081/57178/1655/55325/10728/4848/51389/2908/7337/27086/55818/11315/3065/11240/8289/2103/51569/7181/1408/5585/56937/23019/5469/6597/6049/7533/3169/9667/9113/9575/2100/11057/9611/10498/6258/142/9125/7110/6502/4306/3275/6294/10424/4824/5245/8085/9420/6879/51341/5187/811/149563/5465/2104/9612/29966…	83
GO:0098930	axonal transport	46/8285	64/14199	0.0175599	0.372816	0.361742	5048/6683/5874/84062/23095/10947/23291/4133/24137/3091/9371/51566/8120/3315/66008/10749/547/11127/7014/8546/55207/23287/84709/23162/6647/66000/9638/1740/667/7345/10239/81565/3799/9001/1176/22906/26985/84871/55330/63915/388552/282991/1778/6687/4976/3281	46
GO:0008088	axo-dendritic transport	55/8285	78/14199	0.0178793	0.378231	0.366997	5048/6683/27067/5874/84062/23095/10947/23291/4133/24137/3091/9371/51566/8120/147700/3315/3312/8936/66008/6421/10749/547/11127/7014/8546/55207/23287/84709/23162/6647/351/66000/9638/1740/667/3192/7345/10239/81565/3799/9001/64837/1176/22906/26985/5813/84871/55330/63915/388552/282991/1778/6687/4976/3281	55
GO:0006900	vesicle budding from membrane	44/8285	61/14199	0.0181937	0.379886	0.368603	8452/9892/8301/7879/25956/56681/51510/10959/10484/10483/128866/9218/8976/1759/8729/8724/64083/10802/10342/22937/59349/9217/128637/27183/8546/54874/22872/1453/55204/9919/84364/51128/375056/6396/1173/5584/10972/79643/302/5071/3638/6281/26286/10016	44
GO:0090305	nucleic acid phosphodiester bond hydrolysis	147/8285	225/14199	0.0183547	0.379886	0.368603	81691/60528/2067/4361/8635/23644/11284/5424/23293/5423/23016/25996/55728/1653/55218/22894/8602/22803/8846/23405/328/9692/25939/9683/90459/10775/23646/5438/51010/55247/4848/11052/51567/83594/57472/29102/5810/10111/4968/54464/22916/7257/79033/5511/51692/11340/27340/84083/5395/79002/27161/10799/23019/92667/192669/7538/23404/10247/114034/2073/6041/65080/5168/54840/87178/1763/246175/79661/5428/28987/5…	147
GO:0034968	histone lysine methylation	81/8285	119/14199	0.0183795	0.379886	0.368603	4800/23028/55904/3720/672/51230/5926/51742/58508/9682/55183/546/2122/1789/23411/9739/79918/84148/2146/23081/2625/2145/6830/7468/51111/9555/55683/55818/55870/6018/4297/1786/84787/11137/83852/23168/11107/54934/23067/80349/4089/23476/63976/22823/9869/56950/80854/7403/8473/54904/79723/29104/22976/26053/2672/90780/80335/64324/8085/1499/55209/3008/54790/4204/10782/57673/79813/29072/54880/84193/387893/7…	81
GO:0006268	DNA unwinding involved in DNA replication	18/8285	22/14199	0.0184097	0.379886	0.368603	5888/4175/8318/4174/9837/4173/56652/9400/4172/6117/3159/84296/9401/7486/4176/64785/5813/641	18
GO:0007205	protein kinase C-activating G protein-coupled receptor signaling pathway	18/8285	22/14199	0.0184097	0.379886	0.368603	1608/1606/8611/8527/1906/9463/160851/23683/135/1607/1609/56288/8525/8526/9162/2915/2596/2149	18
GO:0035162	embryonic hemopoiesis	18/8285	22/14199	0.0184097	0.379886	0.368603	4254/79879/8563/3091/6789/6788/2625/7422/7173/4297/5469/468/3815/6886/2624/161882/5087/282991	18
GO:0046599	regulation of centriole replication	18/8285	22/14199	0.0184097	0.379886	0.368603	672/4591/2648/56890/8850/7840/9525/6491/55755/10733/55835/163786/221908/85459/153241/100653515/4869/10432	18
GO:1903046	meiotic cell cycle process	119/8285	180/14199	0.0193876	0.398521	0.386684	56603/9918/2067/4361/23304/54888/5888/4438/55706/259266/6196/9319/55743/4292/7155/1906/55063/10403/546/8438/6790/11144/4627/51343/5518/5889/10635/26271/7272/5810/10111/10051/7474/10096/2956/7320/27030/84930/23397/84057/81930/3306/151648/29893/7153/63979/56154/56907/192670/83990/10592/29988/1761/10097/50511/675/83540/2177/1060/256006/7013/472/3619/83447/23310/1909/10018/221711/136991/146956/56776/…	119
GO:0032543	mitochondrial translation	51/8285	72/14199	0.0194987	0.398521	0.386684	64951/55699/4528/8846/26164/51654/124454/2617/708/54516/23107/10352/55157/9617/219402/51116/10102/79072/57505/51081/55037/65080/51204/57129/84300/10128/51067/80222/57038/28957/92170/55005/115416/285367/54948/26995/3396/85476/3035/78988/54931/63899/7284/64963/51021/51335/28958/51373/283459/54460/81554	51
GO:0042254	ribosome biogenesis	191/8285	297/14199	0.0197694	0.398521	0.386684	115939/51096/51106/51121/23517/51602/57602/10885/54505/23016/7520/29093/7514/22894/6193/51729/8602/8886/22803/6128/51575/6175/23481/10521/26164/5303/90459/10775/6217/6223/85865/51010/10360/23560/4927/708/117246/55813/54433/11103/4839/23195/705/29102/8850/6152/6209/84128/79954/80135/54680/79033/387338/55127/54853/11340/27340/2971/130916/51116/6125/29960/10199/10799/51081/64794/51119/10436/92797/79…	191
GO:0031123	RNA 3'-end processing	72/8285	105/14199	0.0198702	0.398521	0.386684	60528/26986/51095/23016/6626/79670/10914/79882/1477/58490/26512/9810/90459/26024/51010/22849/57508/11052/11044/22916/64895/79033/51692/11340/23404/1736/2926/114034/23318/55339/87178/580/6741/57117/55197/55520/351/25896/5433/79869/56254/134353/6832/10898/51728/23248/7884/167153/55656/25962/51585/53981/123169/11051/10768/5394/6227/54931/51574/1479/84967/80789/677/389421/345630/6829/112479/9646/2282…	72
GO:0031445	regulation of heterochromatin assembly	20/8285	25/14199	0.019928	0.398521	0.386684	23028/7175/5290/1786/22880/51535/83852/80312/9869/23272/80063/25942/55729/23133/55196/353274/54737/5253/9646/84456	20
GO:0070076	histone lysine demethylation	20/8285	25/14199	0.019928	0.398521	0.386684	23028/9682/5927/84678/3299/23081/55818/10765/7320/51780/8242/23030/7403/84864/221037/23133/22992/7404/55693/5253	20
GO:0071459	protein localization to chromosome, centromeric region	20/8285	25/14199	0.019928	0.398521	0.386684	3720/55166/54908/10403/9183/10664/7272/57082/5925/91272/9184/81620/79003/983/27085/55055/9212/9735/283489/23137	20
GO:0120261	regulation of heterochromatin organization	20/8285	25/14199	0.019928	0.398521	0.386684	23028/7175/5290/1786/22880/51535/83852/80312/9869/23272/80063/25942/55729/23133/55196/353274/54737/5253/9646/84456	20
GO:0007131	reciprocal meiotic recombination	38/8285	52/14199	0.0200013	0.398521	0.386684	4361/23304/5888/4438/9319/4292/7155/8438/11144/5889/10635/10111/7320/27030/84057/29893/7153/83990/2177/256006/472/146956/11077/164045/5885/79703/2072/80010/317761/5890/5892/57697/84464/25788/197342/6847/100507650/1325	38
GO:0140527	reciprocal homologous recombination	38/8285	52/14199	0.0200013	0.398521	0.386684	4361/23304/5888/4438/9319/4292/7155/8438/11144/5889/10635/10111/7320/27030/84057/29893/7153/83990/2177/256006/472/146956/11077/164045/5885/79703/2072/80010/317761/5890/5892/57697/84464/25788/197342/6847/100507650/1325	38
GO:0033599	regulation of mammary gland epithelial cell proliferation	13/8285	15/14199	0.0201259	0.398521	0.386684	3202/2625/595/57142/10765/6239/675/90780/6091/80139/128239/11331/2876	13
GO:0048311	mitochondrion distribution	13/8285	15/14199	0.0201259	0.398521	0.386684	4205/10059/55156/2648/66008/55154/23277/4534/9001/168620/22906/57835/120892	13
GO:0120032	regulation of plasma membrane bounded cell projection assembly	117/8285	177/14199	0.0204253	0.403091	0.391118	5898/9912/57787/6792/10178/54443/8100/26751/27067/4134/10198/23224/2665/9474/10787/6624/5337/5909/7419/5205/2932/8829/8814/2332/688/9738/857/23242/8976/7046/23189/7016/9148/5216/90410/23603/4117/9750/1809/8087/10096/55704/163404/7043/5290/57489/989/117177/11135/5420/54869/22873/324/5879/4957/5962/54874/51626/10097/2660/10152/83478/84260/54828/84299/7226/115704/51057/5868/9353/170690/4651/51256/10…	117
GO:0006405	RNA export from nucleus	56/8285	80/14199	0.0210411	0.413856	0.401563	5976/23279/54888/7175/55746/23293/55421/9984/23511/84271/8563/8106/8480/4927/6830/57122/11052/6428/9631/22916/9887/2733/55051/56943/10657/3181/10212/57510/9972/79902/57187/55795/8021/79228/5901/3178/1660/6741/5433/26019/3087/23049/8888/26097/10482/51808/7248/160419/55308/3267/4869/29072/11260/23381/29890/100101267	56
GO:0007051	spindle organization	120/8285	182/14199	0.0212189	0.415519	0.403177	26073/7756/10460/6683/7175/4134/55726/259266/2009/387/8243/23332/284403/1739/4292/10615/10403/10464/25978/22924/546/51510/6790/22974/55857/10726/24137/7430/114327/25777/4627/4605/8480/9371/22919/128866/55125/10735/6795/5518/56647/9126/3837/57562/26271/26054/7272/51652/4751/10274/10783/9525/6491/51119/9787/79000/54617/90417/27243/5901/891/9493/55142/27229/3832/10579/1062/9611/1213/1453/83540/6867/…	120
GO:0060560	developmental growth involved in morphogenesis	141/8285	216/14199	0.0213785	0.415519	0.403177	51265/5048/6792/9043/7869/22902/7414/23327/23105/26999/9423/57609/2263/5590/6857/9175/10371/10512/4133/1906/22999/3320/54437/2932/9706/6790/9962/393/5459/4897/57556/1808/3326/25/8829/51199/23394/6299/51760/5802/59284/23242/3984/9355/6456/1855/6387/5532/1982/8437/8936/5754/7422/9037/7474/5361/150465/57669/3676/57142/2335/10765/8828/53335/63923/157506/6909/8239/57699/51299/5469/23769/23499/6049/323…	141
GO:0033047	regulation of mitotic sister chromatid segregation	32/8285	43/14199	0.0214083	0.415519	0.403177	7756/54908/7175/9319/10403/9183/84861/26271/7272/1063/9587/7517/55795/56984/891/324/55755/51143/472/3192/9184/701/4085/5885/5347/81620/699/55055/348654/9212/9735/51451	32
GO:1990089	response to nerve growth factor	32/8285	43/14199	0.0214083	0.415519	0.403177	3309/11075/2889/6456/2648/9693/867/11021/8936/7337/3280/23527/5906/2309/6272/57498/1783/9101/4916/9775/1453/351/207/66000/4915/382/1398/627/10519/9863/7442/4914	32
GO:0034243	regulation of transcription elongation from RNA polymerase II promoter	30/8285	40/14199	0.0216964	0.415901	0.403548	10771/8621/8812/11198/51497/8312/8178/2146/9400/6830/9025/10915/22936/55837/7428/23476/55840/3192/23160/165918/123169/51755/1499/51574/7469/10614/25920/8861/6827/2074	30
GO:0006301	postreplication repair	26/8285	34/14199	0.021803	0.415901	0.403548	26073/5980/83932/672/5424/56852/10714/7319/4436/5427/11201/9100/5425/7320/51426/5111/51455/55339/51514/25898/201973/7336/197370/5429/7334/7335	26
GO:0008608	attachment of spindle microtubules to kinetochore	28/8285	37/14199	0.0218426	0.415901	0.403548	7756/10615/10403/81929/6795/1894/4751/90417/151648/891/324/57082/1062/5925/83540/27436/1060/91272/3192/9184/29127/84142/23172/81620/79003/51115/9212/283489	28
GO:0051567	histone H3-K9 methylation	28/8285	37/14199	0.0218426	0.415901	0.403548	23028/3720/672/5926/51742/9682/55183/546/2122/1789/23411/23081/55818/55870/1786/83852/11107/63976/9869/80854/79723/55209/4204/10782/57673/79813/55693/5079	28
GO:0015931	nucleobase-containing compound transport	136/8285	208/14199	0.0218523	0.415901	0.403548	5976/9961/23279/54888/7175/55706/4904/55746/23293/10644/55421/79023/54715/9984/51006/7514/81929/51637/10762/23511/84271/8563/10478/8106/8480/63910/2332/10204/3837/4927/6830/4928/57097/57122/11052/6428/29074/9444/2030/9631/55186/22916/10057/6432/9887/23169/23443/2733/55051/348995/56943/10237/10657/3181/92014/10212/57510/51000/9972/10257/65109/79902/60386/79085/57187/55795/8021/7538/7263/11046/7922…	136
GO:0046777	protein autophosphorylation	136/8285	208/14199	0.0218523	0.415901	0.403548	6792/2534/9961/1195/4361/9821/7444/23604/5610/816/9748/2263/815/2046/2011/6793/9175/7294/4140/2260/9262/2932/9706/27102/51701/6790/8550/54822/53904/3717/25/7443/6789/9770/85366/3055/11040/8428/4683/857/2022/7016/10553/10645/4117/7422/7272/57396/3702/10111/23178/10494/2043/54206/4751/10783/8805/60673/57826/5911/5582/440275/65975/4294/1965/51765/5156/51347/2045/91/7006/10457/5593/3480/25989/5170/10…	136
GO:0006479	protein methylation	123/8285	187/14199	0.0219944	0.415913	0.403559	4800/23028/1387/55904/3720/10157/672/51230/5926/51742/58508/93166/9682/79091/55183/546/2122/1789/23411/9739/79609/10664/79918/2935/84148/2146/23081/2625/2145/6830/7468/51111/11108/56341/59336/9555/51409/55683/55818/23463/55870/7799/6018/4297/196483/1788/5110/2107/6628/1786/23378/54496/84787/11137/83852/23168/80204/80312/11107/54934/23067/80349/4089/23476/10498/63976/22823/9869/56950/79823/151194/…	123
GO:0008213	protein alkylation	123/8285	187/14199	0.0219944	0.415913	0.403559	4800/23028/1387/55904/3720/10157/672/51230/5926/51742/58508/93166/9682/79091/55183/546/2122/1789/23411/9739/79609/10664/79918/2935/84148/2146/23081/2625/2145/6830/7468/51111/11108/56341/59336/9555/51409/55683/55818/23463/55870/7799/6018/4297/196483/1788/5110/2107/6628/1786/23378/54496/84787/11137/83852/23168/80204/80312/11107/54934/23067/80349/4089/23476/10498/63976/22823/9869/56950/79823/151194/…	123
GO:0008033	tRNA processing	83/8285	123/14199	0.0232828	0.43148	0.418664	60528/6301/54888/54802/6894/23536/60487/55623/8518/51095/1653/51637/339175/16/54517/51493/55687/8846/9692/51654/123263/56986/10775/26024/26610/83480/63892/81627/54482/79828/57505/10799/57570/64172/84705/2926/55140/25917/54522/25821/55226/91801/80745/6741/55520/51002/10667/54901/10556/79691/10557/80746/285381/152992/10785/51728/127253/129450/11157/158234/115708/81605/54920/51367/9836/285605/64118/…	83
GO:0099111	microtubule-based transport	129/8285	197/14199	0.0234904	0.43148	0.418664	5048/6683/8100/1767/27067/5874/8481/23247/84062/23095/23224/5590/10947/23291/1781/4133/5108/11158/5991/3797/24137/80173/11020/3091/51098/9371/51566/8120/147700/8701/79989/3315/57584/90410/79864/3312/4117/22858/8936/8382/27031/55081/66008/6421/117178/56912/55686/57539/89891/112752/79809/164781/55112/10749/547/11127/7014/8546/55207/23287/167691/63971/84709/26160/51626/10128/403/23162/89941/2622/550…	129
GO:0000012	single strand break repair	8285-10-01	11/14199	0.0235879	0.43148	0.418664	1161/7515/23411/7014/54840/142/200558/3981/2074/100133315	10
GO:0001675	acrosome assembly	8285-10-01	11/14199	0.0235879	0.43148	0.418664	5048/11063/5990/84519/128637/6691/64753/5819/57082/7110	10
GO:0021860	pyramidal neuron development	8285-10-01	11/14199	0.0235879	0.43148	0.418664	2263/4967/57178/55558/57282/27185/27089/538/166614/2290	10
GO:0060623	regulation of chromosome condensation	8285-10-01	11/14199	0.0235879	0.43148	0.418664	9031/9918/23063/64151/10051/23397/3021/10592/79648/8467	10
GO:0070601	centromeric sister chromatid cohesion	8285-10-01	11/14199	0.0235879	0.43148	0.418664	10664/5518/80218/151648/91272/701/151246/1499/8313/699	10
GO:1903564	regulation of protein localization to cilium	8285-10-01	11/14199	0.0235879	0.43148	0.418664	2665/2932/55704/22873/2622/56623/54585/10807/285331/84455	10
GO:0000729	DNA double-strand break processing	15/8285	18/14199	0.023818	0.43148	0.418664	5893/4361/55218/55100/92797/51444/83990/1763/56916/7336/7334/317761/79008/84464/641	15
GO:0034244	negative regulation of transcription elongation from RNA polymerase II promoter	15/8285	18/14199	0.023818	0.43148	0.418664	51497/8312/2146/9400/9025/10915/55837/7428/3192/165918/51574/7469/10614/25920/6827	15
GO:0035372	protein localization to microtubule	15/8285	18/14199	0.023818	0.43148	0.418664	11043/22924/22919/4281/51104/1855/9419/146057/1729/58489/9585/3192/10982/10634/283489	15
GO:0036507	protein demannosylation	15/8285	18/14199	0.023818	0.43148	0.418664	55741/111089941/55757/4121/80267/57134/9695/56886/91445/10299/267/11236/11253/10905/7844	15
GO:0036508	protein alpha-1,2-demannosylation	15/8285	18/14199	0.023818	0.43148	0.418664	55741/111089941/55757/4121/80267/57134/9695/56886/91445/10299/267/11236/11253/10905/7844	15
GO:0044380	protein localization to cytoskeleton	41/8285	57/14199	0.0238447	0.43148	0.418664	57787/23386/10615/5108/11043/2932/10464/22924/29887/6790/22919/55125/4281/51104/1855/7272/9419/6491/11190/146057/1729/324/9857/58489/9585/1453/22994/79648/636/3192/9903/27185/10982/84376/2804/51134/64770/10634/283489/9851/137886	41
GO:0061512	protein localization to cilium	50/8285	71/14199	0.0241619	0.435878	0.422931	9135/55812/84062/57545/2665/57560/7289/2932/29887/51382/9321/23090/8701/79989/90410/84100/152015/55704/8934/57539/27130/27241/79809/60412/261734/22873/403/317662/2622/1453/221322/56623/57728/199221/51304/54585/55764/10807/7275/4218/378/79867/200894/285331/23265/79659/9742/387707/84455/339829	50
GO:0035825	homologous recombination	39/8285	54/14199	0.0247245	0.444663	0.431455	4361/23304/5888/4438/64710/9319/4292/7155/8438/11144/5889/10635/10111/7320/27030/84057/29893/7153/83990/2177/256006/472/146956/11077/164045/5885/79703/2072/80010/317761/5890/5892/57697/84464/25788/197342/6847/100507650/1325	39
GO:0001701	in utero embryonic development	229/8285	361/14199	0.0261554	0.465836	0.452	3479/2530/8452/54888/5954/2296/639/8531/29924/841/4904/2263/23250/5423/22846/53615/26469/7319/1906/79728/79977/8648/10959/3294/25831/4436/51733/5594/51493/10454/4627/8846/3091/57680/9837/6789/655/56853/57534/8312/23322/4683/6788/8178/2116/56006/7472/10049/2737/7046/23081/7763/2625/657/9644/57178/2648/6830/10566/4848/653/705/7422/4124/10087/9421/3280/57669/51639/90/57142/57448/2034/9927/25949/4751…	229
GO:0007097	nuclear migration	17/8285	21/14199	0.0262979	0.465836	0.452	5048/23224/9423/23291/5108/10726/25777/85440/29109/25893/23353/79789/84376/153241/6585/199953/1778	17
GO:0021884	forebrain neuron development	17/8285	21/14199	0.0262979	0.465836	0.452	2263/10371/8829/4967/26468/57178/9693/8828/55558/57282/27185/27089/538/7314/166614/79625/2290	17
GO:0031290	retinal ganglion cell axon guidance	17/8285	21/14199	0.0262979	0.465836	0.452	3670/5459/4897/8829/7422/6152/2045/10505/658/9353/5800/2047/214/5797/1946/6092/6585	17
GO:0033962	P-body assembly	17/8285	21/14199	0.0262979	0.465836	0.452	1656/4848/57472/23019/25804/149041/246175/8994/25819/255967/27258/56478/1778/29883/550643/6311/197135	17
GO:0061640	cytoskeleton-dependent cytokinesis	67/8285	98/14199	0.0264229	0.466646	0.452785	26073/54902/54443/6683/9820/387/6093/25978/51510/24137/114327/27443/128866/5414/9094/11021/10112/1894/152015/10096/51652/9525/989/10617/51429/27243/27183/4628/56907/9475/324/26586/51203/9493/10097/403/55165/9585/9101/55752/375/388/5921/55909/3619/55521/346288/56776/129531/6651/54784/29127/79884/23176/9897/5347/4735/10015/341019/79643/5339/9212/9798/151011/84501/57132/79400	67
GO:0007626	locomotory behavior	102/8285	154/14199	0.0268929	0.472764	0.458722	5048/1272/55236/1497/80243/55283/58524/28996/55737/1136/10269/23259/372/23551/26090/57144/6505/6387/5532/4669/1182/2743/55084/9896/2916/51185/7337/2257/27429/3398/6801/2043/11315/4985/1143/3218/135/2571/3235/3236/54982/5538/1742/9698/23287/56924/10499/463/9611/4864/409/6647/351/4211/6323/57282/3358/2911/7545/4929/56172/7345/3084/1827/2695/22941/6886/5194/91137/55074/2636/2395/538/7248/3251/5090/2…	102
GO:0006400	tRNA modification	60/8285	87/14199	0.0269696	0.472764	0.458722	54888/54802/6894/60487/55623/8518/339175/16/54517/55687/8846/51654/123263/56986/26610/83480/63892/81627/54482/79828/57505/57570/64172/84705/55140/25917/54522/25821/55226/91801/80745/6741/51002/54901/79691/285381/152992/10785/127253/129450/158234/115708/81605/54920/9836/285605/64118/55006/54931/80324/63899/55039/79979/134637/112970/55253/131965/81890/221078/441250	60
GO:0099175	regulation of postsynapse organization	53/8285	76/14199	0.0270526	0.472764	0.458722	9912/5048/6792/2534/27067/84062/816/25791/55737/5063/4897/51104/3312/23316/7337/7474/85461/2043/8828/9419/5552/547/2045/4076/58489/3706/10097/10152/8499/4916/26045/2895/9456/5789/51738/7804/100528062/10611/378/22871/91752/1000/26115/4884/5621/1072/8851/120892/5649/3556/26037/80823/2904	53
GO:0007018	microtubule-based movement	224/8285	353/14199	0.0270909	0.472764	0.458722	5048/6683/8100/1767/27067/5874/8481/23247/84062/4134/23095/23224/55726/5590/10947/29105/23291/1781/4133/5108/11158/5991/3797/64147/55614/3476/24137/27285/80173/8911/11020/3091/51098/9371/51566/8120/147700/81492/93233/79846/8701/79989/3315/57584/9148/5414/3837/90410/79864/3312/4117/22858/8936/8382/10112/27031/55081/152015/10096/1768/66008/55870/6421/117178/56912/9928/55686/84071/57539/56171/7320/8…	224
GO:0018196	peptidyl-asparagine modification	19/8285	24/14199	0.0278702	0.481197	0.466904	2530/6480/84061/55757/7991/6185/29880/4245/3703/56886/79053/201595/6184/55662/124872/4247/256281/51465/58505	19
GO:0032528	microvillus organization	19/8285	24/14199	0.0278702	0.481197	0.466904	10083/54825/6624/5337/5909/5205/7430/688/9693/5357/5911/5420/51765/23043/51735/4640/5781/342035/11344	19
GO:0032770	positive regulation of monooxygenase activity	19/8285	24/14199	0.0278702	0.481197	0.466904	5291/949/3091/10392/1594/7421/4883/11315/8074/2643/7014/207/116150/808/7015/538/2668/9722/1719	19
GO:0071763	nuclear membrane organization	31/8285	42/14199	0.0279014	0.481197	0.466904	5048/6683/25978/51510/7443/128866/2010/7329/51652/10783/23435/27243/27183/23175/27348/1861/26092/5578/221035/5579/81565/5347/23306/79188/165324/23399/79643/23141/1104/137886/57132	31
GO:0000910	cytokinesis	105/8285	159/14199	0.0279869	0.48126	0.466965	90293/26073/54902/54443/6683/8452/9820/5586/387/6093/5289/8556/8555/25978/51510/6790/24137/990/114327/51100/27443/4627/9371/128866/9738/79848/6795/5414/9094/11021/10112/1894/152015/10096/51652/57448/9928/9525/311/989/10617/51429/27243/84440/27183/4628/56907/9475/324/26586/63971/51203/9493/10097/403/55165/9585/9101/55752/675/3480/10733/375/388/8502/5921/55909/3619/55521/25909/346288/56776/129531/6…	105
GO:0051170	import into nucleus	100/8285	151/14199	0.028357	0.483657	0.469291	23633/999/7175/10758/23534/3843/1994/55746/5743/5663/2646/51194/55696/57506/10762/23511/3326/3717/4792/6789/55612/2254/3839/10204/6788/51366/30000/2737/51684/3837/4927/10553/4928/57122/1432/60468/51715/1871/9631/3836/1894/868/7341/51569/23435/1408/1434/9972/79902/5469/9349/8021/84268/5901/10526/29969/3178/55198/26953/53371/144165/7157/207/9531/7545/653489/5903/3621/284/6396/26060/129401/6850/9221…	100
GO:0031952	regulation of protein autophosphorylation	29/8285	39/14199	0.0284991	0.483657	0.469291	9961/4361/9770/4683/857/2022/7016/7422/10111/54206/57826/5911/2045/10457/10040/56034/85456/7424/55364/1636/808/152110/80310/92597/3725/5154/5167/801/1654	29
GO:0032506	cytokinetic process	29/8285	39/14199	0.0284991	0.483657	0.469291	54443/6683/387/25978/51510/4627/128866/10112/1894/51652/9525/311/51429/27243/27183/56907/55165/9585/375/55909/129531/54784/29127/10015/79643/5339/9212/84501/57132	29
GO:0090317	negative regulation of intracellular protein transport	29/8285	39/14199	0.0284991	0.483657	0.469291	27248/3998/5905/55612/51684/51715/7341/11315/9270/51569/51763/337867/29969/7295/580/9531/284/160140/11142/5569/3753/55432/7327/3638/120892/4763/258010/51465/2664	29
GO:0016445	somatic diversification of immunoglobulins	42/8285	59/14199	0.0288164	0.483657	0.469291	2067/10721/7158/5423/6929/7037/4292/9984/55183/4436/25939/4683/51010/6830/7468/51111/9025/4437/2956/7292/54537/5395/78996/80762/56259/84787/23075/3586/121260/3329/7518/22976/8888/165918/27343/200558/9156/3981/79915/56941/118460/5591	42
GO:0007143	female meiotic nuclear division	23/8285	30/14199	0.0291675	0.483657	0.469291	9319/4292/10403/6790/5518/5889/26271/7272/27030/84930/23397/7153/56907/472/56776/9133/11077/9897/5347/7314/10388/84501/347688	23
GO:0140058	neuron projection arborization	23/8285	30/14199	0.0291675	0.483657	0.469291	1856/4649/6093/9175/10371/4036/8829/5764/1855/221692/7474/23499/25830/1742/56924/22891/4343/23426/10642/22854/10251/22871/120892	23
GO:0140718	facultative heterochromatin assembly	23/8285	30/14199	0.0291675	0.483657	0.469291	23028/53615/11176/23411/3065/1788/3070/1786/23378/22880/51535/83852/80312/9869/23272/80063/55729/23133/55196/57673/54737/5253/84456	23
GO:1900181	negative regulation of protein localization to nucleus	23/8285	30/14199	0.0291675	0.483657	0.469291	26022/1495/25885/2932/55612/51684/51715/7341/51569/9113/9201/29969/23650/26524/26272/284/11142/25942/166614/5569/9500/4763/64771	23
GO:0010762	regulation of fibroblast migration	25/8285	33/14199	0.0291954	0.483657	0.469291	5063/393/117584/8874/23603/9270/9590/79899/55198/5879/7057/2247/207/51057/2768/9219/3688/2241/26060/114757/4921/5747/5581/90355/6546	25
GO:0033144	negative regulation of intracellular steroid hormone receptor signaling pathway	25/8285	33/14199	0.0291954	0.483657	0.469291	1407/672/3670/387/9063/23411/4848/27086/3065/1408/23019/6597/9575/9611/9125/5245/9420/51341/5187/811/9612/29966/25959/81606/11331	25
GO:0033146	regulation of intracellular estrogen receptor signaling pathway	25/8285	33/14199	0.0291954	0.483657	0.469291	672/23376/3670/79876/55325/4848/51569/23019/5469/3169/9113/10498/142/9125/6502/8085/9420/149563/29966/25959/65992/81606/11331/161582/79447	25
GO:1901976	regulation of cell cycle checkpoint	25/8285	33/14199	0.0291954	0.483657	0.469291	1407/7175/9984/10403/51776/79968/8563/6118/9587/7517/55795/891/79621/55755/8451/54465/51143/26272/4085/81620/55159/10116/348654/11200/51451	25
GO:0051298	centrosome duplication	49/8285	70/14199	0.0297952	0.490828	0.476248	672/284403/23032/10403/7514/25978/51510/23411/128866/55125/9738/22995/4591/2648/56890/8850/51652/7840/5311/9525/6491/7517/27243/9475/55226/55755/675/22994/10733/55835/163786/54461/221908/80817/91147/85459/29901/153241/10015/9662/9793/284001/25914/348654/100653515/4869/9851/10432/57132	49
GO:0071479	cellular response to ionizing radiation	49/8285	70/14199	0.0297952	0.490828	0.476248	23028/672/3309/5888/1535/7158/64710/7520/10269/51776/23411/2625/1410/10635/1432/5810/1894/54617/63979/9575/4193/10010/580/675/7157/25896/388/11011/85456/472/8091/144715/26272/9577/25836/23514/7486/598/5883/3981/545/375757/11200/79184/55693/3014/2547/641/404672	49
GO:0006999	nuclear pore organization	8285-12-01	14/14199	0.0303556	0.493152	0.478504	7175/55706/55746/81929/4928/57122/57142/9972/53371/25909/23165/129401	12
GO:0031958	corticosteroid receptor signaling pathway	8285-12-01	14/14199	0.0303556	0.493152	0.478504	1407/4734/3717/10728/2908/8289/1408/7533/9575/5245/5187/811	12
GO:0043201	response to leucine	8285-12-01	14/14199	0.0303556	0.493152	0.478504	23304/58528/5289/27244/84861/6198/5290/51520/57521/143686/197131/2475	12
GO:2000104	negative regulation of DNA-templated DNA replication	8285-12-01	14/14199	0.0303556	0.493152	0.478504	3980/54962/8914/26271/51053/84083/84893/675/29980/81620/641/91603	12
GO:2000767	positive regulation of cytoplasmic translation	8285-12-01	14/14199	0.0303556	0.493152	0.478504	7812/8531/4904/5315/26986/10492/1660/3184/3192/10642/7555/10605	12
GO:0007409	axonogenesis	252/8285	400/14199	0.0307246	0.497772	0.482987	23077/2115/51265/5048/6792/2534/11313/3730/7869/3670/22902/1272/6683/9369/7414/7204/2042/23105/3909/3918/9423/5588/57609/2263/4756/2046/2011/1400/9175/8301/2736/10371/10512/60/5076/5362/7155/23032/5063/4133/1906/4983/285220/5663/3320/54437/2932/9706/334/10890/393/1947/5459/4897/57556/1808/3326/25/8829/51199/9252/23394/655/284217/10857/4168/79006/7976/9253/333/5802/6324/1749/3199/23242/5803/2737/3…	252
GO:0048704	embryonic skeletal system morphogenesis	61/8285	89/14199	0.0309033	0.499292	0.484462	3207/2263/1739/7289/79977/4522/655/3199/3200/3202/3203/2737/7046/2253/3216/3373/1746/23314/7043/3218/3215/3213/25902/157506/3204/7291/3227/860/55112/3232/3235/3236/5156/7020/1280/9775/27173/6935/4325/57728/28982/25836/4088/1499/6474/3233/3219/3212/4087/10265/57453/8092/3225/29072/3214/9241/9742/5079/3201/3221/3217	61
GO:0008344	adult locomotory behavior	47/8285	67/14199	0.0312535	0.501415	0.486522	5048/1497/80243/58524/28996/10269/372/26090/6387/1182/2743/2257/27429/2043/11315/4985/3218/3235/3236/5538/9698/23287/4864/409/351/6323/7545/4929/7345/2695/22941/55074/2636/2395/7248/5090/2668/4204/55636/6623/1600/114781/6900/5071/127343/22876/26058	47
GO:0006383	transcription by RNA polymerase III	38/8285	53/14199	0.0312905	0.501415	0.486522	10178/9031/6617/7629/2975/171568/57680/55290/8178/6908/2976/23451/10625/6738/9330/84265/2971/7913/9329/79664/10514/57521/84524/8467/112495/51728/23379/6619/6621/9188/7702/10302/5441/2972/2475/2074/27297/25850	38
GO:0032210	regulation of telomere maintenance via telomerase	38/8285	53/14199	0.0312905	0.501415	0.486522	11284/5588/23293/7520/4216/8550/3183/5594/80351/54464/10575/4751/6950/25913/54552/1736/7014/55226/3178/10574/79618/7013/472/22948/140609/26272/3192/10694/7203/10576/1499/5394/167227/545/9212/23381/54984/100134934	38
GO:0010976	positive regulation of neuron projection development	91/8285	137/14199	0.0318897	0.509629	0.494491	8837/23028/5048/2534/1272/3082/27067/2042/3309/816/2011/5063/9139/3655/25/2033/23394/655/8428/11075/8175/84079/6324/5764/23242/54664/2146/2889/23064/1855/9693/4192/23316/653/8724/9896/5754/55754/411/1809/7474/5906/64175/163404/440730/2281/466/51761/57498/4076/54606/153090/3706/10097/3480/4916/10300/81545/7436/4915/9638/27020/7804/8321/4690/100528062/2909/27185/5584/81565/4920/91752/257194/10690/7…	91
GO:0060491	regulation of cell projection assembly	117/8285	179/14199	0.0320438	0.510703	0.495533	5898/9912/57787/6792/10178/54443/8100/26751/27067/4134/10198/23224/2665/9474/10787/6624/5337/5909/7419/5205/2932/8829/8814/2332/688/9738/857/23242/8976/7046/23189/7016/9148/5216/90410/23603/4117/9750/1809/8087/10096/55704/163404/7043/5290/57489/989/117177/11135/5420/54869/22873/324/5879/4957/5962/54874/51626/10097/2660/10152/83478/84260/54828/84299/7226/115704/51057/5868/9353/170690/4651/51256/10…	117
GO:0051168	nuclear export	99/8285	150/14199	0.0328112	0.521521	0.50603	5976/23279/8498/54888/7175/55746/23293/55421/9984/55437/2932/7514/55696/23511/84271/8563/5905/27351/8106/8480/2010/10204/4927/6830/57122/11052/6428/3313/9631/22916/6209/11315/9887/2733/55051/56943/10657/3181/10212/1434/57510/6310/9972/79902/57187/55795/8021/23039/79228/5901/64328/3178/84946/1660/23325/11097/7295/10541/51496/580/6741/84934/5433/6934/26019/9531/5784/127933/3087/23049/8888/26097/104…	99
GO:0048545	response to steroid hormone	180/8285	282/14199	0.0333469	0.528606	0.512905	8837/7035/2288/23028/799/1407/672/9604/23376/3670/1373/11063/1535/10076/8611/387/4129/4734/490/6720/5743/9063/1906/79876/594/5978/7023/10081/7042/23411/3717/10521/2033/655/5931/9325/23205/51366/8725/857/2692/2022/23081/57178/6198/1655/55325/3312/595/4192/10728/4848/51389/2690/4015/2908/7337/590/27086/90/3485/55818/6382/54206/11315/3065/11240/8289/2309/687/7043/2103/51569/7181/1408/5290/11335/5585…	180
GO:0007098	centrosome cycle	84/8285	126/14199	0.033918	0.536215	0.520288	57787/672/54875/4659/51175/284403/23032/5108/10403/7514/25978/51510/6790/23411/5902/51199/9371/128866/55125/9738/22995/4591/2648/56890/8850/51652/7840/117178/4751/5311/9525/6491/84612/3834/11190/7517/151648/27243/11127/9475/55226/4957/55755/55142/3832/675/22994/10733/79648/54801/1111/55835/115106/1070/163786/54461/221908/79884/80817/91147/85459/81565/5347/1499/29901/153241/1107/10015/983/9662/979…	84
GO:1904356	regulation of telomere maintenance via telomere lengthening	43/8285	61/14199	0.034342	0.539188	0.523173	11284/5588/23293/7520/4216/8550/3183/5594/80351/54464/10575/4751/6950/3181/25913/54552/1736/7014/55226/3178/10574/142/79618/7013/472/22948/140609/26272/3192/10694/7203/10576/1499/5394/167227/545/2072/9212/79008/84464/23381/54984/100134934	43
GO:2000781	positive regulation of double-strand break repair	43/8285	61/14199	0.034342	0.539188	0.523173	54799/1663/11284/54556/60/55063/55183/2521/23347/51111/2305/10635/8914/10902/55719/80314/54537/9643/8089/84787/84250/56907/26122/10097/83666/23126/142/64210/56776/64769/23514/84717/7336/8607/7334/2187/57634/10933/55693/196528/84501/2074/5591	43
GO:0022613	ribonucleoprotein complex biogenesis	266/8285	424/14199	0.034602	0.539188	0.523173	10181/6936/55692/115939/51096/11171/51106/51121/23517/10659/51602/57602/6433/1975/10885/54505/1207/23016/7520/1653/3320/29093/25929/7514/22894/26747/6193/51729/8602/8886/22803/6128/51575/6175/8487/6732/3326/23481/10521/6430/24148/26164/51340/56853/5303/90459/8175/10775/6217/55702/6223/85865/23064/51010/8661/10360/23560/4927/708/117246/55813/51747/54433/27339/10728/11052/11103/4839/8683/23195/705/…	266
GO:0000076	DNA replication checkpoint signaling	14/8285	17/14199	0.0346562	0.539188	0.523173	54962/4998/63967/8318/990/8914/1763/90381/144715/11073/81620/5883/135458/91603	14
GO:0048485	sympathetic nervous system development	14/8285	17/14199	0.0346562	0.539188	0.523173	10371/8829/7976/2625/8828/6659/2676/1909/1499/2668/3642/4763/4914/91584	14
GO:1903441	protein localization to ciliary membrane	14/8285	17/14199	0.0346562	0.539188	0.523173	9135/84062/57560/9321/90410/8934/60412/403/57728/54585/7275/200894/23265/84455	14
GO:0051293	establishment of spindle localization	32/8285	44/14199	0.0349747	0.542708	0.526587	5048/54908/4134/23291/3993/23332/10403/9183/4627/3837/3834/3996/56907/10253/55755/51203/6993/79648/3688/2697/56776/23122/10252/4085/81565/5347/1072/89958/1778/3064/84501/137886	32
GO:0061564	axon development	278/8285	444/14199	0.035214	0.544984	0.528796	23077/2115/51265/5048/6792/2534/11313/3730/7869/3670/22902/1272/6683/9369/7414/7204/1495/2042/23105/3909/3918/9423/5588/57609/2263/4756/2046/2011/1400/9175/8301/2736/10371/10512/60/5076/5362/7155/23032/5063/4133/1906/4983/285220/5663/3320/54437/2932/9706/334/10890/393/1947/5459/4897/57556/1808/3326/3717/25/8829/51199/9252/23394/655/284217/10857/4168/8428/79006/7976/9253/333/5802/6324/1749/5764/31…	278
GO:0033157	regulation of intracellular protein transport	137/8285	212/14199	0.0353874	0.54507	0.52888	9912/10178/2534/22902/999/7175/57602/3843/56850/27248/1459/6720/5743/3998/5108/56681/5663/2932/7514/55696/10075/55741/111089941/57506/3326/3717/51100/89781/5905/55612/9777/2010/51201/79752/51366/665/9141/208/2737/6505/5599/51684/7323/975/9847/1432/51715/55754/11235/1894/27429/7341/11315/8934/9270/51569/23435/3208/51614/5901/51763/64328/9695/337867/29969/79899/9648/3936/7295/10541/6653/51496/9585/…	137
GO:0009895	negative regulation of catabolic process	181/8285	284/14199	0.035405	0.54507	0.52888	1595/26073/23077/7812/2534/3082/11345/54888/23274/9967/23118/57602/10758/8531/11178/28996/4904/1994/9682/6093/9759/55737/5774/26986/1459/32/51548/27074/57103/4983/5663/8898/2521/23256/3183/51322/3326/1153/84861/3162/1457/128866/9097/55613/2332/9683/8925/55353/6449/4233/57589/51684/23185/80279/1982/1432/2822/8724/11044/1611/3156/1981/8604/2043/5768/11315/3953/81892/55051/148/23435/51538/5290/6125/…	181
GO:0031345	negative regulation of cell projection organization	113/8285	173/14199	0.0355622	0.546061	0.529841	2288/9912/51265/5048/2534/7869/22902/7431/84062/4134/10198/23105/2665/9423/57609/25791/387/1400/10371/10512/5909/4133/9139/5663/54437/9706/393/57556/8829/4168/9738/11075/5802/23189/7016/22943/9693/4117/9037/1809/7337/7474/3280/1716/57142/2043/8934/53335/57489/1948/117177/6049/7533/2258/55558/23111/2045/10505/81618/10253/9856/80031/22891/83478/84260/10498/115704/29956/5793/9353/51256/107080638/580…	113
GO:0048146	positive regulation of fibroblast proliferation	30/8285	41/14199	0.0361204	0.547618	0.531352	3479/23063/2355/51548/990/25/1021/7472/57178/7474/2335/891/5156/1019/1660/79621/4609/890/56034/1956/4921/4724/648/5319/80310/3981/3725/2621/5154/358	30
GO:0030330	DNA damage response, signal transduction by p53 class mediator	48/8285	69/14199	0.0365591	0.547618	0.531352	23028/960/28996/27330/51512/10269/546/7023/23411/5716/9100/4683/10397/55702/1655/2305/51147/2309/7291/6615/6659/9521/4193/64844/675/8533/7157/5366/8444/56950/472/22925/22976/1859/4487/161742/8738/8493/545/340485/3090/754/11200/387893/51065/4646/200734/4194	48
GO:0031297	replication fork processing	28/8285	38/14199	0.0371739	0.547618	0.531352	1663/4361/259282/5888/64710/9984/55218/546/25939/84083/5111/84893/22891/1763/55345/675/54465/253714/146956/201973/7486/55159/545/348654/57697/641/197342/1325	28
GO:0045910	negative regulation of DNA recombination	28/8285	38/14199	0.0371739	0.547618	0.531352	10721/7158/4292/9984/55183/4436/23347/9400/4437/2956/84083/54537/92797/80762/7014/84893/115004/54386/3008/80311/116028/64110/2187/8971/55010/3006/3005/641	28
GO:1900026	positive regulation of substrate adhesion-dependent cell spreading	28/8285	38/14199	0.0371739	0.547618	0.531352	55679/10979/55604/57091/25/8829/1399/11078/8874/7016/708/4192/10675/335/57580/6239/5879/80005/1793/10109/1398/5881/3987/811/10519/5034/2316/6281	28
GO:0031125	rRNA 3'-end processing	8285-09-01	10/14199	0.0371798	0.547618	0.531352	23016/90459/51010/79033/11340/23404/5394/6227/112479	9
GO:0042276	error-prone translesion synthesis	8285-09-01	10/14199	0.0371798	0.547618	0.531352	5980/10714/5427/11201/5425/51426/51455/201973/5429	9
GO:0046710	GDP metabolic process	8285-09-01	10/14199	0.0371798	0.547618	0.531352	1739/260425/9414/4354/8573/1740/136332/9583/79873	9
GO:0048755	branching morphogenesis of a nerve	8285-09-01	10/14199	0.0371798	0.547618	0.531352	2263/9175/57142/1746/53335/2045/473/6474/120892	9
GO:0071233	cellular response to leucine	8285-09-01	10/14199	0.0371798	0.547618	0.531352	23304/58528/27244/84861/51520/57521/143686/197131/2475	9
GO:0075733	intracellular transport of virus	8285-09-01	10/14199	0.0371798	0.547618	0.531352	23633/2332/3839/10332/9972/684/6993/9397/3838	9
GO:1904526	regulation of microtubule binding	8285-09-01	10/14199	0.0371798	0.547618	0.531352	2011/4133/22924/25/22919/5516/5515/146057/2622	9
GO:0001832	blastocyst growth	16/8285	20/14199	0.0372466	0.547618	0.531352	3479/79728/9837/4683/51119/23168/675/54892/84296/1111/53918/9318/81565/5890/9646/91603	16
GO:0010661	positive regulation of muscle cell apoptotic process	16/8285	20/14199	0.0372466	0.547618	0.531352	6416/815/57103/1871/9927/468/5468/7157/4089/817/1029/27250/824/3592/8241/4217	16
GO:0035459	vesicle cargo loading	16/8285	20/14199	0.0372466	0.547618	0.531352	8301/25956/56681/10959/10484/10483/10802/22937/128637/63971/22872/4253/375056/6396/10972/3638	16
GO:0048025	negative regulation of mRNA splicing, via spliceosome	16/8285	20/14199	0.0372466	0.547618	0.531352	6433/11338/56853/708/8683/6432/6429/3181/79171/10284/135295/1859/3190/8241/10772/10921	16
GO:0097734	extracellular exosome biogenesis	16/8285	20/14199	0.0372466	0.547618	0.531352	7251/7879/55512/6382/9525/10987/27243/27183/8027/6386/11267/23400/10015/947/5071/9146	16
GO:0030900	forebrain development	213/8285	337/14199	0.0374191	0.548782	0.532482	23028/5048/2534/10460/3670/55236/999/1767/23035/23224/259266/2263/387/5307/1459/7515/2736/10371/284403/5915/7155/5108/4983/5663/4036/2932/546/22803/84678/3912/114327/8829/1399/51199/3091/6299/23322/9253/333/1021/1749/4967/2692/2146/2737/9355/26468/80709/6387/657/2253/22943/57178/2648/2145/9693/4192/2735/3736/113246/5992/221692/9037/7474/3280/57142/27429/5013/3398/22930/1746/3065/85440/6513/9928/8…	213
GO:0042176	regulation of protein catabolic process	236/8285	375/14199	0.0376353	0.550579	0.534226	2729/54467/1595/23077/114881/2534/51667/9604/23376/6642/8554/25897/11345/999/23327/5601/8975/28996/4287/6093/55737/4734/5774/1459/28951/55743/7879/23609/51548/27074/3093/4898/83737/4983/5663/3320/4036/2932/7514/57531/10075/5705/6790/25831/7430/51322/3326/51257/25807/27352/9978/27351/1917/1457/9097/5716/140462/2332/9683/8312/9810/51201/55353/6449/51343/857/57589/1855/51684/84961/80279/64750/152503…	236
GO:0030534	adult behavior	75/8285	112/14199	0.0379592	0.55394	0.537487	5048/9369/1497/80243/58524/28996/1136/10269/372/26090/1137/9455/6505/6387/1182/2743/9379/4988/2566/2257/27429/2043/11315/4985/1143/27253/3218/3235/3236/5538/9698/23287/85446/4864/409/91978/351/6323/1393/221935/23657/9456/7545/4929/7345/51738/2695/22941/23385/285671/55074/2636/2395/7248/5090/8772/2668/4204/1138/55636/6623/1600/6712/18/114781/6900/5071/5465/5079/54413/3066/4097/127343/22876/26058	75
GO:0046661	male sex differentiation	93/8285	141/14199	0.038514	0.557231	0.540679	2288/3207/7812/2067/10046/5926/1495/4254/51742/8531/58524/51665/259266/10371/4036/546/7042/4436/1399/23598/22862/2254/268/3209/4521/7046/2625/59338/657/2253/595/867/653/4090/7474/6382/1718/81930/92/10549/3623/128637/8894/3239/599/9667/5914/3021/4678/3295/7482/192670/5156/6926/269/83990/2516/152006/1761/1545/80000/4089/7110/6715/10184/84159/2674/2697/10018/3815/1636/3148/22836/7098/8879/4824/1499/…	93
GO:0006346	DNA methylation-dependent heterochromatin assembly	18/8285	23/14199	0.0386512	0.557231	0.540679	23028/53615/23411/3065/1788/3070/1786/22880/51535/83852/80312/9869/23272/80063/55729/55196/54737/84456	18
GO:0006929	substrate-dependent cell migration	18/8285	23/14199	0.0386512	0.557231	0.540679	23294/9423/2046/4983/8829/6789/506/57669/2335/9270/6386/9353/7424/101/4690/6091/57698/23607	18
GO:0018279	protein N-linked glycosylation via asparagine	18/8285	23/14199	0.0386512	0.557231	0.540679	2530/6480/84061/55757/7991/6185/29880/4245/3703/56886/79053/201595/6184/124872/4247/256281/51465/58505	18
GO:0018022	peptidyl-lysine methylation	88/8285	133/14199	0.0390911	0.557231	0.540679	4800/23028/55904/3720/672/51230/5926/51742/58508/9682/79091/55183/546/2122/1789/23411/9739/79609/79918/84148/2146/23081/2625/2145/6830/7468/51111/9555/55683/55818/55870/6018/4297/196483/1786/84787/11137/83852/23168/11107/54934/23067/80349/4089/23476/63976/22823/9869/56950/79823/151194/80854/7403/8473/54904/221143/134145/79723/29104/22976/26053/2672/90780/80335/64324/8085/1499/55209/3008/54790/420…	88
GO:0032467	positive regulation of cytokinesis	22/8285	29/14199	0.039219	0.557231	0.540679	26073/6683/8452/5586/387/8556/8555/990/9371/79848/6795/1894/9928/9493/9585/3480/8502/29127/201161/5581/9212/6840	22
GO:0045648	positive regulation of erythrocyte differentiation	22/8285	29/14199	0.039219	0.557231	0.540679	23774/3091/1432/60682/6772/2309/92/3071/116151/5469/2113/91/23456/11143/6886/3148/6774/7564/6777/2624/9636/5591	22
GO:0050686	negative regulation of mRNA processing	22/8285	29/14199	0.039219	0.557231	0.540679	6433/11338/79882/56853/9810/708/8683/6432/6429/3181/79171/580/10284/135295/56254/1859/3190/8241/10772/6829/9646/10921	22
GO:0060416	response to growth hormone	22/8285	29/14199	0.039219	0.557231	0.540679	1373/5829/3717/5251/7297/3718/2690/3488/9518/4609/87178/207/6715/51738/3716/6774/5747/6777/5770/55777/54741/10626	22
GO:0007628	adult walking behavior	20/8285	26/14199	0.0392269	0.557231	0.540679	1497/58524/28996/10269/26090/2743/27429/2043/23287/4864/409/6323/7545/7345/55074/2636/2395/55636/1600/6900	20
GO:0046755	viral budding	20/8285	26/14199	0.0392269	0.557231	0.540679	51534/4734/7251/25978/51510/128866/51652/9525/27243/27183/79720/93343/90678/137492/11267/55048/10015/79643/89853/57132	20
GO:0032387	negative regulation of intracellular transport	37/8285	52/14199	0.0393646	0.557838	0.541269	7175/27248/55737/3998/5905/55612/51684/1410/51715/8724/7341/11315/9270/51569/9972/51763/337867/29969/7295/580/29934/9531/284/27236/160140/11142/5569/3753/55432/7327/3638/120892/4763/258010/51465/2664/23779	37
GO:0018210	peptidyl-threonine modification	78/8285	117/14199	0.0399083	0.563145	0.546417	8798/1195/65125/28996/6093/1459/815/2011/3093/2932/51701/5594/57452/7443/655/1457/85366/8312/8767/51422/7046/5599/10114/7272/7474/1981/90/5585/8445/4294/51763/9475/91/51719/10253/1950/5170/57521/351/207/8444/2590/8476/114805/9730/1609/817/6872/56288/85456/1111/5578/1859/808/285203/219736/161742/5579/5347/983/596/143941/156/442117/8851/8408/63917/29110/5587/8558/120892/200734/27347/801/9578/2475/5…	78
GO:1902850	microtubule cytoskeleton organization involved in mitosis	96/8285	146/14199	0.0399305	0.563145	0.546417	26073/5048/7756/10460/6683/54908/7175/4134/55726/2009/387/8243/23291/23332/284403/10403/10464/25978/51510/9183/6790/22974/10726/24137/114327/25777/4605/8480/9371/128866/55125/10735/6795/56647/9126/3837/57562/7272/51652/4751/10274/10783/9525/6491/51119/9787/27243/5901/891/10253/55755/51203/9493/3832/10579/1062/1213/83540/6993/79648/6867/3688/2697/64946/3192/126731/5116/29127/84142/23122/10252/4085…	96
GO:0090630	activation of GTPase activity	68/8285	101/14199	0.0400573	0.563581	0.546841	23637/25771/55633/23216/25791/7813/5909/51291/55357/84144/1399/83874/27352/5905/208/23094/23158/23603/7474/1894/10297/85440/57568/2302/27237/9779/23108/57533/92154/54885/9882/84253/9411/83478/79774/4916/9905/54828/115704/128272/8394/93627/51256/107080638/26230/9712/9910/10563/7074/7248/143872/81565/129049/10999/1398/125058/10125/253959/391/613/57186/26037/11138/6494/30851/353149/729873/101060376	68
GO:0030522	intracellular receptor signaling pathway	150/8285	234/14199	0.0407613	0.572118	0.555124	7105/56603/2288/23028/1407/672/9604/23376/3670/330/23369/131566/57491/8611/387/5165/6095/4734/6720/80216/5915/9063/83737/79876/8648/23411/3717/1399/10521/2033/4792/54941/9325/8767/51366/2692/2146/23081/23586/57178/708/1655/79132/5608/55325/329/10728/1594/7421/4848/51389/55914/2908/7337/27086/64135/55818/11315/3065/2494/11240/8289/2103/51569/7181/1408/7291/8805/5585/5740/56937/23019/5469/7067/3661…	150
GO:0043414	macromolecule methylation	192/8285	303/14199	0.041001	0.573037	0.556016	4800/23028/1387/55904/3720/10157/672/51230/51106/5926/54888/51742/58508/6894/93166/9682/6688/60487/79091/53615/11176/55183/79977/10269/546/2122/339175/1789/23411/9739/9463/79609/64863/10664/79918/2935/84148/2146/23081/2625/117246/2145/6830/7468/51111/11108/56341/4839/59336/9555/51409/55683/55818/63892/23463/55870/7799/6018/387338/4297/196483/1788/3070/5110/2107/81627/5290/54482/29960/23091/79828/…	192
GO:0000959	mitochondrial RNA metabolic process	35/8285	49/14199	0.0411191	0.573037	0.556016	60528/51106/54802/51095/9692/51654/64863/124454/2617/56652/7019/10352/55157/2309/81892/80298/130916/79072/57505/57570/7978/2926/25821/87178/10128/79675/51067/80222/6832/55006/84275/54931/201626/80324/60493	35
GO:0008089	anterograde axonal transport	35/8285	49/14199	0.0411191	0.573037	0.556016	6683/5874/84062/23095/10947/4133/24137/9371/8120/3315/66008/10749/547/11127/7014/8546/55207/23287/84709/23162/6647/9638/1740/10239/3799/9001/1176/22906/26985/84871/55330/63915/388552/282991/6687	35
GO:0045132	meiotic chromosome segregation	56/8285	82/14199	0.0413129	0.574376	0.557315	4361/4438/55706/9319/55743/4292/7155/55063/11144/5518/5889/7272/10051/10096/7320/27030/23397/151648/29893/7153/56154/192670/83990/10592/10097/83540/2177/1060/256006/7013/472/146956/56776/701/130951/164045/151246/5885/23353/5347/145645/699/339834/2072/80010/317761/57697/84464/10388/197342/6847/100130958/100507650/1325/283847/101928601	56
GO:0032006	regulation of TOR signaling	66/8285	98/14199	0.0423104	0.586754	0.569326	23304/58528/23274/1497/6098/55593/27244/10269/81929/8550/117584/51322/23411/84861/9681/3091/9894/9675/79726/6009/8649/55846/26268/7957/64083/10641/5290/3071/84219/23677/51520/55654/84803/57521/8444/1609/93627/51256/107080638/2768/203228/143686/472/64798/6396/197131/23387/5563/253260/154743/54468/7248/90809/23251/4534/56834/144577/220441/153129/283554/2621/389541/5649/23334/10016/729438	66
GO:1902115	regulation of organelle assembly	126/8285	195/14199	0.0424028	0.586754	0.569326	57787/6792/672/8100/7175/4134/5601/10198/23224/2665/9474/387/7251/6624/10615/7419/2932/25978/51510/64147/23256/7430/51100/8814/3055/128866/9738/7016/4591/2648/90410/56890/4848/4117/26054/57472/8850/8723/55704/51652/22930/6382/7840/25782/9525/57489/989/6491/23019/27243/57533/22873/3936/8027/4957/55755/6386/5962/51626/246175/84260/4916/4089/115704/10733/5899/5868/170690/10146/51256/107080638/26045/…	126
GO:0010761	fibroblast migration	33/8285	46/14199	0.0428954	0.592178	0.574588	5063/393/117584/8874/7763/9124/23603/9270/9590/79899/55198/5879/7057/2247/8826/207/8394/51057/2768/9219/3688/84159/2241/26060/114757/4921/8879/5747/5581/5339/90355/6546/199953	33
GO:0016572	histone phosphorylation	31/8285	43/14199	0.0446753	0.603906	0.585968	9031/7444/10269/6790/3717/7443/9252/2332/51231/10270/6795/9555/79858/7320/7291/5585/9730/890/472/3619/1111/5531/8091/8467/5578/5563/151987/5579/983/9212/57223	31
GO:0045862	positive regulation of proteolysis	208/8285	330/14199	0.0450096	0.603906	0.585968	2729/54467/843/8837/114881/2534/51667/9604/637/8554/25897/5601/26999/8975/841/4287/387/28951/5134/55743/23291/8301/489/2023/23609/51548/2192/4898/29843/5663/2932/5978/5705/6790/7023/22861/25831/825/23411/3717/23786/83874/9647/4627/9978/5641/5716/2332/8312/9810/1512/8767/6449/9141/51343/22900/857/10392/5118/6505/55848/1855/152503/1075/10162/9532/2822/64065/1611/1452/26355/55081/27429/2335/7341/204…	208
GO:0031647	regulation of protein stability	174/8285	274/14199	0.0452309	0.603906	0.585968	1387/26224/3920/7756/440193/3479/8452/57646/8863/23327/57602/8975/55737/483/6400/6720/55743/23291/23032/51548/3320/10403/55230/51701/6790/54997/7018/825/3326/23411/51100/5594/89781/25793/2033/9894/6789/9770/6907/11040/1512/6788/11140/1855/23560/5216/2648/7466/1410/3312/975/10728/1389/2597/9532/11235/7375/57142/10575/7341/2043/11315/64175/56912/335/1385/7320/6950/23435/6125/8805/8239/5190/6659/231…	174
GO:0002566	somatic diversification of immune receptors via somatic mutation	8285-11-01	13/14199	0.0453879	0.603906	0.585968	10721/5423/4292/4436/25939/2956/5395/8888/103/27343/9156	11
GO:0021859	pyramidal neuron differentiation	8285-11-01	13/14199	0.0453879	0.603906	0.585968	2263/4967/57178/55558/57282/137970/27185/27089/538/166614/2290	11
GO:0032530	regulation of microvillus organization	8285-11-01	13/14199	0.0453879	0.603906	0.585968	10083/54825/6624/5337/5909/5205/7430/688/5357/5420/11344	11
GO:0033169	histone H3-K9 demethylation	8285-11-01	13/14199	0.0453879	0.603906	0.585968	23028/9682/3299/23081/55818/51780/23030/221037/23133/55693/5253	11
GO:0035721	intraciliary retrograde transport	8285-11-01	13/14199	0.0453879	0.603906	0.585968	22858/57539/89891/112752/79809/55112/51626/57728/55764/79659/9742	11
GO:0042753	positive regulation of circadian rhythm	8285-11-01	13/14199	0.0453879	0.603906	0.585968	56938/9967/6095/23291/2692/135/9575/7080/51738/8945/22871	11
GO:0042921	glucocorticoid receptor signaling pathway	8285-11-01	13/14199	0.0453879	0.603906	0.585968	1407/4734/10728/2908/8289/1408/7533/9575/5245/5187/811	11
GO:0099633	protein localization to postsynaptic specialization membrane	8285-11-01	13/14199	0.0453879	0.603906	0.585968	5590/1739/2239/59284/5906/23096/1742/102/4884/1605/10082	11
GO:0099645	neurotransmitter receptor localization to postsynaptic specialization membrane	8285-11-01	13/14199	0.0453879	0.603906	0.585968	5590/1739/2239/59284/5906/23096/1742/102/4884/1605/10082	11
GO:1900242	regulation of synaptic vesicle endocytosis	8285-11-01	13/14199	0.0453879	0.603906	0.585968	6093/5532/5533/1861/1609/808/1173/22871/154664/114781/120892	11
GO:1900262	regulation of DNA-directed DNA polymerase activity	8285-11-01	13/14199	0.0453879	0.603906	0.585968	5982/9837/5985/63922/5111/5983/84296/5984/54921/64785/11232	11
GO:1900264	positive regulation of DNA-directed DNA polymerase activity	8285-11-01	13/14199	0.0453879	0.603906	0.585968	5982/9837/5985/63922/5111/5983/84296/5984/54921/64785/11232	11
GO:1903599	positive regulation of autophagy of mitochondrion	8285-11-01	13/14199	0.0453879	0.603906	0.585968	55187/25793/3091/55626/10645/11315/291/5071/3064/7416/10715	11
GO:0008631	intrinsic apoptotic signaling pathway in response to oxidative stress	29/8285	40/14199	0.0464335	0.615035	0.596767	23411/3717/3091/8428/3315/8382/11235/27429/10494/11315/6421/10131/29979/1545/6647/207/4170/142/10550/5163/9833/9529/5598/596/56616/5071/5034/4217/2876	29
GO:0035329	hippo signaling	29/8285	40/14199	0.0464335	0.615035	0.596767	25937/5606/55841/8463/4140/6789/6788/1432/23286/51421/55233/154796/9113/126374/9686/8994/26524/80014/60485/7073/29970/22941/154810/92597/4771/7003/79633/7004/9867	29
GO:0010977	negative regulation of neuron projection development	85/8285	129/14199	0.047793	0.630384	0.611659	2288/51265/5048/7869/22902/7431/84062/23105/9423/57609/25791/387/1400/10371/10512/4133/9139/5663/54437/9706/393/57556/8829/4168/11075/5802/23189/22943/9037/1809/7337/7474/3280/1716/57142/2043/8934/53335/1948/6049/2258/55558/23111/2045/10505/81618/9856/80031/22891/10498/29956/5793/5800/6695/223117/2672/152559/382/7248/9529/23251/5780/22871/9723/1600/7025/386724/8851/8408/2580/56963/83999/23258/105…	85
GO:0007264	small GTPase mediated signal transduction	291/8285	468/14199	0.0478067	0.630384	0.611659	115703/5898/9855/9912/9265/23221/440193/3479/10928/50619/51306/57514/8452/7204/80243/57646/4254/5291/2665/10787/9423/25791/10565/4649/387/6093/4925/9448/9886/51495/55160/5337/55843/5909/9138/2782/4983/57531/23348/79822/8550/51291/393/11069/7042/10044/25/84144/22931/8829/4650/1399/3162/27352/6655/394/4168/2245/5516/23370/22898/9266/23094/10156/4233/1124/6009/3984/81704/23189/2889/23268/8729/57584/…	291
GO:0032212	positive regulation of telomere maintenance via telomerase	25/8285	34/14199	0.0497299	0.634926	0.616067	11284/5588/7520/4216/8550/5594/80351/10575/4751/6950/25913/1736/3178/10574/79618/472/22948/140609/26272/10694/7203/10576/1499/545/9212	25
GO:0070306	lens fiber cell differentiation	25/8285	34/14199	0.0497299	0.634926	0.616067	7431/3299/51343/81029/10765/631/128637/57110/468/10253/6498/6496/10152/2247/23657/10252/161742/10818/4088/4094/4771/2301/399473/23424/200734	25
GO:1905508	protein localization to microtubule organizing center	25/8285	34/14199	0.0497299	0.634926	0.616067	57787/23386/10615/5108/2932/10464/29887/6790/22919/55125/6491/11190/324/9857/1453/22994/79648/636/27185/84376/2804/51134/64770/9851/137886	25
GO:0006606	protein import into nucleus	96/8285	147/14199	0.049952	0.634926	0.616067	23633/999/7175/10758/23534/3843/1994/55746/5743/5663/2646/51194/55696/57506/10762/23511/3326/3717/4792/6789/55612/2254/3839/10204/6788/51366/30000/2737/51684/3837/4927/4928/57122/1432/51715/1871/9631/3836/1894/868/7341/51569/23435/1408/1434/9972/79902/5469/9349/8021/84268/5901/10526/29969/55198/26953/53371/144165/7157/207/9531/7545/653489/5903/3621/284/6396/26060/129401/6850/9221/4088/6774/11142/…	96
GO:0008340	determination of adult lifespan	13/8285	16/14199	0.0499588	0.634926	0.616067	10269/8438/4436/2692/29842/2956/7799/3416/7157/472/115004/120892/25788	13
GO:0009151	purine deoxyribonucleotide metabolic process	13/8285	16/14199	0.0499588	0.634926	0.616067	25939/1716/84618/30833/55270/26289/221264/132/1633/7498/100/131870/79873	13
GO:0030033	microvillus assembly	13/8285	16/14199	0.0499588	0.634926	0.616067	6624/5337/5909/5205/7430/688/9693/5911/5420/51765/23043/51735/4640	13
GO:0043116	negative regulation of vascular permeability	13/8285	16/14199	0.0499588	0.634926	0.616067	10979/634/6456/7422/135/9590/10266/9353/5795/284/2909/5139/5138	13
GO:0043576	regulation of respiratory gaseous exchange	13/8285	16/14199	0.0499588	0.634926	0.616067	26164/2744/23178/57616/79068/92170/4929/30012/5090/4204/22871/54413/6526	13
GO:0051000	positive regulation of nitric-oxide synthase activity	13/8285	16/14199	0.0499588	0.634926	0.616067	5291/949/3091/10392/4883/2643/7014/207/116150/808/7015/9722/1719	13
GO:0097062	dendritic spine maintenance	13/8285	16/14199	0.0499588	0.634926	0.616067	2534/55737/8898/9463/51104/85461/3706/3480/9456/91752/3643/5621/2904	13
GO:0140374	antiviral innate immune response	13/8285	16/14199	0.0499588	0.634926	0.616067	4938/22861/51257/22900/23586/8165/57337/4599/81570/5245/84282/79844/11331	13
GO:1902683	regulation of receptor localization to synapse	13/8285	16/14199	0.0499588	0.634926	0.616067	9912/5590/56850/2239/8417/5906/23096/102/27020/160622/51304/1605/10082	13
GO:2000001	regulation of DNA damage checkpoint	13/8285	16/14199	0.0499588	0.634926	0.616067	1407/9984/51776/79968/8563/6118/79621/8451/54465/26272/55159/10116/11200	13
GO:0006654	phosphatidic acid biosynthetic process	23/8285	31/14199	0.0511493	0.634926	0.616067	51099/56895/1608/1606/5337/8527/63874/160851/8443/79575/23175/1607/84803/1609/8525/8526/137964/56894/51205/200879/253558/254531/149998	23
GO:0060421	positive regulation of heart growth	23/8285	31/14199	0.0511493	0.634926	0.616067	3479/2263/7049/32/1906/4208/2254/7472/657/2735/1432/6909/10038/23493/2247/9472/57057/3516/23414/983/10409/2066/7490	23
GO:2000036	regulation of stem cell population maintenance	23/8285	31/14199	0.0511493	0.634926	0.616067	1994/5076/5978/84678/655/5764/2648/4848/55818/2103/51123/23091/8202/23019/4017/4609/63978/8091/60485/6886/23160/7004/81606	23
GO:0048736	appendage development	107/8285	165/14199	0.0512758	0.634926	0.616067	56603/3207/1387/54542/2263/57560/5307/10979/10512/5362/5915/7289/5663/79977/546/3655/51776/7042/5125/51098/655/2254/6299/23322/54928/1749/64327/23288/3209/2737/657/2253/22943/2648/4621/7704/8850/7474/3065/1889/3664/157506/6909/7291/8434/3227/6659/860/5469/3235/3236/3239/8854/79412/5914/3691/6926/7020/26160/55212/2201/1280/494470/4089/27173/51057/3899/80856/5066/221322/2768/2719/340419/341640/2365…	107
GO:0060173	limb development	107/8285	165/14199	0.0512758	0.634926	0.616067	56603/3207/1387/54542/2263/57560/5307/10979/10512/5362/5915/7289/5663/79977/546/3655/51776/7042/5125/51098/655/2254/6299/23322/54928/1749/64327/23288/3209/2737/657/2253/22943/2648/4621/7704/8850/7474/3065/1889/3664/157506/6909/7291/8434/3227/6659/860/5469/3235/3236/3239/8854/79412/5914/3691/6926/7020/26160/55212/2201/1280/494470/4089/27173/51057/3899/80856/5066/221322/2768/2719/340419/341640/2365…	107
GO:0030520	intracellular estrogen receptor signaling pathway	34/8285	48/14199	0.0516319	0.634926	0.616067	672/23376/3670/79876/10521/9325/1655/55325/4848/11240/8289/51569/23019/5469/3169/9113/2100/10498/142/9125/6502/6294/8085/9420/6879/149563/29966/25959/65992/81606/11331/161582/8031/79447	34
GO:0031057	negative regulation of histone modification	34/8285	48/14199	0.0516319	0.634926	0.616067	23028/3720/10157/672/9474/9682/6688/5927/1789/23411/51366/23081/6830/26036/9555/55818/7320/6418/7291/1786/22823/5531/9320/6497/1487/151987/25942/6879/54880/80764/55693/340602/5079/57223	34
GO:0006406	mRNA export from nucleus	41/8285	59/14199	0.052259	0.634926	0.616067	5976/23279/54888/7175/55746/23293/55421/9984/84271/8563/8106/8480/4927/6830/57122/6428/9631/22916/9887/2733/56943/3181/10212/79902/57187/55795/8021/79228/5433/26019/3087/23049/8888/26097/10482/160419/55308/3267/29072/23381/29890	41
GO:0048814	regulation of dendrite morphogenesis	41/8285	59/14199	0.052259	0.634926	0.616067	23098/51265/5048/6792/27067/9820/23327/816/11178/4734/5063/1136/2932/79791/84079/9693/23316/2043/23363/5911/7533/577/4076/56965/3706/10097/57520/5789/23043/7804/100528062/26012/6383/85442/26259/29882/10507/5649/26037/80823/1523	41
GO:0007076	mitotic chromosome condensation	15/8285	19/14199	0.052264	0.634926	0.616067	9031/9918/10270/64151/11044/10051/23397/10592/51203/113130/23310/8467/7273/5347/387893	15
GO:0034501	protein localization to kinetochore	15/8285	19/14199	0.052264	0.634926	0.616067	55166/54908/10403/9183/7272/57082/9184/81620/79003/983/27085/55055/9212/9735/283489	15
GO:1903083	protein localization to condensed chromosome	15/8285	19/14199	0.052264	0.634926	0.616067	55166/54908/10403/9183/7272/57082/9184/81620/79003/983/27085/55055/9212/9735/283489	15
GO:1904738	vascular associated smooth muscle cell migration	15/8285	19/14199	0.052264	0.634926	0.616067	387/4208/2254/2887/3488/85440/9732/7168/93649/2768/80005/9510/7015/538/5592	15
GO:1990182	exosomal secretion	15/8285	19/14199	0.052264	0.634926	0.616067	7251/7879/55512/6382/9525/10987/27243/27183/8027/6386/11267/23400/10015/5071/9146	15
GO:0007064	mitotic sister chromatid cohesion	21/8285	28/14199	0.0522939	0.634926	0.616067	8243/27127/23047/546/9126/9555/55719/80218/23244/151648/23383/84250/5925/23126/91272/113130/286053/25836/5885/54921/23137	21
GO:0062125	regulation of mitochondrial gene expression	21/8285	28/14199	0.0522939	0.634926	0.616067	8846/26164/51654/64863/708/23107/10102/79072/51204/84300/10128/92170/55005/115416/285367/26995/54931/63899/51335/28958/81554	21
GO:0051303	establishment of chromosome localization	53/8285	78/14199	0.0523261	0.634926	0.616067	55166/8452/54908/4292/10615/10403/10464/25978/81929/51510/9183/10726/128866/3837/150465/10096/51652/1063/9928/7320/9525/81930/9787/27243/27183/891/55143/10097/1062/10300/83540/27436/1060/91272/113130/7013/472/3619/3192/56776/23353/81565/145645/81620/79003/79643/51115/9212/1778/283489/283847/54984/57132	53
GO:0090398	cellular senescence	53/8285	78/14199	0.0523261	0.634926	0.616067	51384/5606/5601/6416/4904/6688/22846/5933/384/7994/10269/8550/23411/25/1021/5599/657/5608/26271/1432/6787/3398/84417/10783/6909/7291/9521/7014/6926/3159/87178/3480/25989/7157/1030/1029/472/8091/22925/286053/79677/7015/115004/5604/26156/5074/811/3014/55532/4217/4976/11179/23137	53
GO:1990823	response to leukemia inhibitory factor	58/8285	86/14199	0.0527864	0.634926	0.616067	3720/9774/5214/7037/7520/55183/29887/5990/23411/5372/4605/54941/4168/688/6217/587/7091/9806/6428/11235/8745/4691/55818/6432/27101/6723/2494/11240/10765/8828/1385/57539/3070/7706/9227/9521/9945/10253/9314/11107/6751/22823/9118/84159/7424/8467/3192/129401/26577/5277/4144/10678/165324/1488/2731/9242/2131/9021	58
GO:0120034	positive regulation of plasma membrane bounded cell projection assembly	63/8285	94/14199	0.0528286	0.634926	0.616067	5898/57787/10178/54443/10787/6624/2932/8829/2332/9738/23242/8976/7046/9148/5216/9750/1809/10096/55704/163404/7043/5290/989/11135/54869/22873/324/5879/54874/10097/2660/10152/54828/84299/139818/10435/2823/55835/158297/3815/10163/26053/146206/2909/221908/10602/10109/538/10807/81565/153241/22871/202018/9001/79647/9662/64787/23580/375790/3064/2475/11344/55845	63
GO:0003148	outflow tract septum morphogenesis	19/8285	25/14199	0.0530205	0.634926	0.616067	3670/2263/10512/4036/7042/8829/2022/657/2253/8828/6909/4091/4089/57057/6091/23414/6092/55742/659	19
GO:0016556	mRNA modification	19/8285	25/14199	0.0530205	0.634926	0.616067	54888/51726/54517/83480/23091/79828/79066/1736/23070/25962/56339/27079/115708/26995/55006/54931/80324/55783/3182	19
GO:0031954	positive regulation of protein autophosphorylation	19/8285	25/14199	0.0530205	0.634926	0.616067	4361/9770/4683/7422/10111/57826/5911/10457/10040/56034/85456/7424/1636/808/152110/80310/5154/801/1654	19
GO:0033119	negative regulation of RNA splicing	19/8285	25/14199	0.0530205	0.634926	0.616067	6433/11338/56853/708/6207/8683/6432/6429/58155/3181/79171/7009/10284/135295/1859/3190/8241/10772/10921	19
GO:0046033	AMP metabolic process	19/8285	25/14199	0.0530205	0.634926	0.616067	204/159/5634/203/271/84618/10606/272/4907/471/50808/221264/132/7498/318/3251/122622/100/158	19
GO:0051647	nucleus localization	19/8285	25/14199	0.0530205	0.634926	0.616067	5048/23224/9423/23291/5108/10726/25777/85440/3834/29109/25893/23353/79789/84376/153241/6585/199953/1778/2475	19
GO:0006622	protein targeting to lysosome	17/8285	22/14199	0.0531175	0.634926	0.616067	4074/3920/9765/4734/7879/3312/79158/23163/27183/8546/6272/9648/6653/7805/26985/9146/8031	17
GO:0009127	purine nucleoside monophosphate biosynthetic process	17/8285	22/14199	0.0531175	0.634926	0.616067	159/5634/3614/1716/271/10606/272/471/132/1633/8833/318/3251/3615/122622/100/158	17
GO:0032607	interferon-alpha production	17/8285	22/14199	0.0531175	0.634926	0.616067	57506/8767/5802/23586/64135/6772/9111/3661/84868/1660/3586/3329/7098/197358/29072/29110/1654	17
GO:0032647	regulation of interferon-alpha production	17/8285	22/14199	0.0531175	0.634926	0.616067	57506/8767/5802/23586/64135/6772/9111/3661/84868/1660/3586/3329/7098/197358/29072/29110/1654	17
GO:0051444	negative regulation of ubiquitin-protein transferase activity	17/8285	22/14199	0.0531175	0.634926	0.616067	6224/5663/25/3984/26271/9532/6209/11315/6125/9349/6135/6167/9184/701/4085/9529/6201	17
GO:0140112	extracellular vesicle biogenesis	17/8285	22/14199	0.0531175	0.634926	0.616067	7251/7879/55512/6382/9525/10987/27243/27183/8027/6386/11267/23400/10015/947/5071/9146/92714	17
GO:0046390	ribose phosphate biosynthetic process	113/8285	175/14199	0.0536018	0.638122	0.619168	204/10165/60481/159/56474/2983/5165/80347/2182/2023/38/9605/32/108/1738/139596/11332/6576/5836/5634/23417/4833/23205/2639/3614/51422/203/506/8382/7372/523/1716/8604/271/515/6785/113/8034/2181/514/51000/27109/80025/10606/83549/5538/47/5160/272/517/4609/109/471/60490/9061/5636/29922/7371/55811/142/5631/50808/51144/134145/1737/498/5163/2977/53354/26289/518/522/221264/1836/132/23181/5635/115/51727/48…	113
GO:0051648	vesicle localization	113/8285	175/14199	0.0536018	0.638122	0.619168	5048/6853/83930/55773/8452/5874/84062/9892/5590/10947/23291/8301/23332/7251/7879/4133/56681/5663/10959/29058/8773/9342/9321/9371/79953/55512/8120/8976/10652/1759/7016/8729/64149/84100/10342/3676/6382/66008/59349/55686/27253/9525/55717/10987/8195/4430/55930/10749/547/27243/11127/27183/23208/8546/8027/1861/63971/6386/54874/55435/55212/8615/8499/65082/1453/91978/4542/357/9919/84364/51128/6854/4643/1…	113
GO:0071385	cellular response to glucocorticoid stimulus	32/8285	45/14199	0.05412	0.642611	0.623524	8837/3670/490/1906/5978/7023/3717/6198/2908/90/54206/2309/687/11335/7538/1545/2660/9101/3480/6715/1977/498/678/10018/3192/114907/6781/11170/64754/677/7332/358	32
GO:0070936	protein K48-linked ubiquitination	46/8285	67/14199	0.0541974	0.642611	0.623524	9690/54476/8452/23327/8454/7319/3093/83737/51619/57531/117584/9978/51366/54926/7323/329/9025/6500/7337/81847/7320/9111/6049/7322/7326/10299/6502/81545/267/89890/8945/54765/7324/80196/11065/220441/10425/7325/7267/7327/5071/84937/7328/57162/10210/27246	46
GO:0009161	ribonucleoside monophosphate metabolic process	39/8285	56/14199	0.0550752	0.649093	0.629813	204/159/1739/22978/260425/139596/51733/5634/3614/203/7372/271/84618/9414/30833/10606/83549/4354/272/4907/471/7371/8573/5631/50808/1740/221264/136332/132/7498/51727/8833/318/3251/3615/122622/1806/100/158	39
GO:0098781	ncRNA transcription	39/8285	56/14199	0.0550752	0.649093	0.629813	1663/6617/6949/2975/546/55506/8178/10927/10360/9555/4691/2976/9014/22936/9330/2971/79871/9329/84172/64768/6597/79664/25926/10208/11137/7157/84524/112495/84365/23379/6619/6621/7702/10302/51574/284119/5441/2972/2475	39
GO:2000736	regulation of stem cell differentiation	39/8285	56/14199	0.0550752	0.649093	0.629813	54888/2296/5610/8621/8463/83737/2932/5978/83959/54517/7042/25/9739/1021/5764/23081/54940/55553/3313/3280/55818/2103/6660/5156/11137/144165/678/3192/56339/11051/51755/6774/2668/3214/25920/51441/81606/10443/5591	39
GO:1903321	negative regulation of protein modification by small protein conjugation or removal	61/8285	91/14199	0.0558696	0.656697	0.637191	2729/1407/6224/2534/23376/9474/11338/5663/3301/825/25/9683/51366/857/3984/23560/26271/9532/7375/6209/11315/10625/6125/6659/9349/5582/54552/80758/6737/10253/64844/10363/409/207/6135/6167/55869/6872/8473/6188/9320/9184/153769/701/59343/4085/819/9529/54765/64359/1499/23251/5581/6201/143941/11146/374969/575/10196/9636/54984	61
GO:1903362	regulation of cellular protein catabolic process	158/8285	249/14199	0.0559437	0.656697	0.637191	2729/54467/114881/51667/9604/23376/8554/25897/11345/5601/8975/28996/4287/55737/1459/28951/55743/23609/51548/27074/3093/4983/5663/3320/4036/2932/7514/5705/6790/25831/7430/51322/3326/51257/9978/27351/1457/9097/5716/2332/9683/8312/9810/55353/6449/51343/857/57589/1855/51684/80279/1075/975/9532/1452/7337/7341/2043/11315/127544/26234/440730/5887/6125/4035/9349/5582/84074/3949/9113/10197/79589/29979/232…	158
GO:0009262	deoxyribonucleotide metabolic process	30/8285	42/14199	0.056668	0.662553	0.642873	51071/50484/51733/25939/4968/1716/84618/23583/30833/1854/8930/1635/55270/6996/79661/26289/252969/221264/132/1633/7498/6240/1841/6241/7298/1806/100/131870/56953/79873	30
GO:0090503	RNA phosphodiester bond hydrolysis, exonucleolytic	30/8285	42/14199	0.056668	0.662553	0.642873	23016/25996/55218/22894/22803/90459/51010/4848/57472/54464/79033/51692/11340/79002/23019/23404/114034/87178/246175/81875/129563/154197/25819/255967/5394/167227/90806/201626/112479/29883	30
GO:0001837	epithelial to mesenchymal transition	95/8285	146/14199	0.0571261	0.666585	0.646785	51384/3670/25937/23187/3082/9820/2042/2296/2263/6093/7049/6949/10979/23332/2260/1906/2932/7042/25805/10521/3091/655/7472/2146/7046/80709/2022/2625/2253/1655/4192/653/5515/7474/57669/90/57142/84695/2043/4139/59349/7043/7291/152007/6615/84172/3169/10439/4017/9475/6926/23493/10253/7080/153090/2295/6386/4089/90102/6934/8091/27250/1909/7074/10630/4487/23122/23272/10252/57057/23462/161742/9221/55273/40…	95
GO:0018023	peptidyl-lysine trimethylation	37/8285	53/14199	0.0580358	0.675859	0.655784	4800/55904/5926/51742/9682/546/23411/9739/79609/23081/51111/4297/196483/84787/11137/23168/23067/80349/23476/8473/54904/134145/79723/80335/8085/55209/3008/54790/4204/10782/57673/29072/84193/54093/55693/3006/9646	37
GO:0140013	meiotic nuclear division	106/8285	164/14199	0.0581981	0.67641	0.656318	56603/4361/23304/5888/4438/55706/259266/6196/9319/55743/4292/7155/55063/10403/8438/6790/11144/51343/5518/5889/10635/26271/7272/5810/10111/10051/7474/10096/7320/27030/84930/23397/84057/81930/3306/151648/29893/7153/63979/56154/56907/192670/83990/10592/29988/1761/10097/50511/675/83540/2177/1060/256006/7013/472/3619/83447/10018/221711/136991/146956/56776/286151/701/9133/10361/130951/11077/164045/4487…	106
GO:0002088	lens development in camera-type eye	49/8285	72/14199	0.0584948	0.678516	0.658362	7431/1497/28996/1739/131544/2195/1417/3299/51343/7472/7046/2625/1410/5818/81029/7474/10765/5469/631/128637/57110/155051/468/7482/10253/6498/8412/6496/10152/2247/4211/221322/357/23657/2697/6497/90780/10252/161742/10818/4088/1499/147912/4094/4771/2301/399473/23424/200734	49
GO:0036473	cell death in response to oxidative stress	54/8285	80/14199	0.0590545	0.681916	0.661661	2534/3082/5151/5978/23411/3717/25/25793/3091/8428/4233/3315/6505/135112/8382/11235/27429/10494/11315/6421/2309/10131/468/51765/29979/3586/7295/1545/6647/7226/207/4170/142/10550/10280/23657/5163/8321/57465/55074/9833/7248/9529/5598/1499/596/5074/56616/5071/5034/120892/4217/494513/2876	54
GO:0050000	chromosome localization	54/8285	80/14199	0.0590545	0.681916	0.661661	25900/55166/8452/54908/4292/10615/10403/10464/25978/81929/51510/9183/10726/128866/3837/150465/10096/51652/1063/9928/7320/9525/81930/9787/27243/27183/891/55143/10097/1062/10300/83540/27436/1060/91272/113130/7013/472/3619/3192/56776/23353/81565/145645/81620/79003/79643/51115/9212/1778/283489/283847/54984/57132	54
GO:0006903	vesicle targeting	28/8285	39/14199	0.059255	0.681916	0.661661	83930/55773/8452/23332/56681/5663/10959/8773/9342/9321/10652/8729/64149/10342/59349/55717/55435/1453/9919/84364/51128/23122/22871/10972/84984/157769/26286/10016	28
GO:0007099	centriole replication	28/8285	39/14199	0.059255	0.681916	0.661661	672/284403/55125/9738/22995/4591/2648/56890/8850/7840/9525/6491/27243/55755/10733/55835/163786/221908/80817/85459/153241/9662/284001/25914/100653515/4869/9851/10432	28
GO:0006164	purine nucleotide biosynthetic process	109/8285	169/14199	0.0594133	0.681916	0.661661	204/10165/60481/159/2983/5165/80347/2182/2023/38/9605/32/108/1738/11332/6576/4522/5634/23417/4833/23205/2639/3614/51422/203/506/8382/523/1716/8604/271/515/6785/113/3208/8034/2181/514/51000/27109/80025/10606/5538/47/5160/272/517/4609/109/471/60490/9061/5636/29922/55811/142/5631/50808/51144/134145/1737/498/5163/2977/53354/26289/518/522/221264/1836/132/1633/23181/5635/115/4880/8833/441024/2982/79993…	109
GO:0051225	spindle assembly	77/8285	117/14199	0.0594836	0.681916	0.661661	26073/7756/7175/259266/387/8243/23332/4292/10615/10403/10464/25978/22924/51510/6790/22974/24137/4605/9371/22919/128866/55125/10735/6795/56647/9126/3837/26271/26054/51652/4751/10274/10783/9525/54617/27243/9493/55142/27229/3832/9611/1453/54801/6188/3619/140609/115106/3192/126731/9133/57519/29127/84142/23122/79884/9897/23172/5347/10982/29901/23015/79643/9212/1104/79598/11200/4733/165186/2316/1778/26…	77
GO:0009152	purine ribonucleotide biosynthetic process	101/8285	156/14199	0.0599818	0.68629	0.665905	204/10165/60481/159/2983/5165/80347/2182/2023/38/9605/32/108/1738/11332/6576/5634/23417/4833/23205/2639/3614/51422/203/506/8382/523/1716/8604/271/515/6785/113/8034/2181/514/51000/27109/80025/10606/5538/47/5160/272/517/4609/109/471/60490/9061/29922/55811/142/50808/51144/134145/1737/498/5163/2977/53354/26289/518/522/221264/1836/132/23181/115/4880/8833/2982/79993/23305/107/318/509/3251/3948/10632/10…	101
GO:1905515	non-motile cilium assembly	42/8285	61/14199	0.0604824	0.690674	0.670159	8100/4134/57545/57560/10640/1183/5108/10464/80173/51098/22919/23322/57562/4117/55081/84902/989/8195/11190/9857/26160/55212/1453/22994/221322/55835/27185/55764/27152/123016/200894/9001/9662/283232/79738/200728/79659/9742/387707/80184/23116/152206	42
GO:0035196	production of miRNAs involved in gene silencing by miRNA	35/8285	50/14199	0.0611441	0.694652	0.674019	23369/79670/10269/51593/26523/23405/1655/29102/29066/3181/27161/192669/54487/4613/9698/192670/23318/84872/9611/93649/7157/1956/103/79753/7015/56339/4088/6774/5604/4087/389421/9612/51490/131405/1654	35
GO:0048008	platelet-derived growth factor receptor signaling pathway	35/8285	50/14199	0.0611441	0.694652	0.674019	5286/9564/3717/25/8829/55512/5157/7763/59338/90410/867/7422/4015/868/2152/4035/3092/9026/5156/8826/93649/56034/5795/84159/2241/4643/25976/8879/80310/5771/5781/9146/5770/5154/9860	35
GO:0051099	positive regulation of binding	104/8285	161/14199	0.0613033	0.694652	0.674019	26073/23028/5329/1663/3670/3479/2296/28996/119/4140/23032/5663/2932/22924/118/25805/3326/3717/25/8829/2033/6789/22919/2332/8767/6788/5516/857/4233/8721/2625/9693/9750/51053/5515/7474/3280/1981/57669/5334/2043/11315/3416/7291/4035/9026/5914/6737/5468/5901/1965/1660/7295/9314/79139/4609/2959/83666/1950/5925/93649/351/6135/4931/142/5899/6872/79618/6934/5457/1054/285381/1193/7074/114991/121665/6497/2…	104
GO:0071478	cellular response to radiation	104/8285	161/14199	0.0613033	0.694652	0.674019	23028/1387/1407/672/2067/3309/57646/5888/1535/5424/54929/7158/64710/4734/5743/10714/7520/10269/51776/23411/2033/79913/2332/9683/208/2625/8787/1410/10635/1432/5810/1894/3373/1408/51426/2868/468/440275/54617/23746/63979/5111/1965/23418/1643/9575/4193/10010/4609/580/675/123041/7157/25896/142/388/79823/84236/11011/6872/85456/472/1111/8091/144715/26272/9397/55364/7508/25769/5603/9577/8450/138162/993/2…	104
GO:0051056	regulation of small GTPase mediated signal transduction	174/8285	276/14199	0.0616454	0.697185	0.676477	9912/9265/3479/10928/50619/51306/57514/8452/7204/80243/4254/5291/25791/10565/4649/9448/55160/55843/5909/9138/4983/79822/51291/393/7042/25/84144/8829/4650/27352/6655/394/4168/2245/5516/23370/22898/9266/23094/10156/4233/1124/81704/23189/23268/8729/57584/8036/9267/55379/7126/867/2305/8437/9750/57221/55914/5924/1894/6654/55103/9927/57568/117178/335/9928/440730/79109/57706/57480/148/57580/23096/10617/…	174
GO:0006623	protein targeting to vacuole	26/8285	36/14199	0.0618502	0.69816	0.677422	4074/3920/27072/9765/55187/4734/7879/3312/79158/23163/54832/27183/8546/6272/9648/6653/79720/137492/7805/55048/26985/9146/30849/23230/57154/8031	26
GO:1990830	cellular response to leukemia inhibitory factor	57/8285	85/14199	0.0625427	0.704395	0.683472	3720/9774/5214/7037/7520/55183/29887/5990/23411/5372/4605/54941/4168/688/6217/587/7091/9806/6428/11235/8745/4691/55818/6432/27101/6723/2494/11240/10765/8828/1385/57539/3070/7706/9227/9521/9945/10253/9314/11107/6751/22823/9118/84159/7424/8467/3192/129401/26577/5277/4144/10678/165324/1488/2731/9242/9021	57
GO:0051321	meiotic cell cycle	146/8285	230/14199	0.0631296	0.704395	0.683472	56603/9918/2067/4361/23304/54888/64848/5888/4438/55706/259266/6196/9319/8243/55743/10179/4292/7155/27127/1906/55063/10403/546/8438/9183/6790/11144/25777/4627/4683/6795/51343/5518/10927/9126/5889/10635/26271/7272/5810/10111/5515/10051/7474/10096/2956/4751/7320/27030/84930/23397/84057/81930/140901/3306/9088/151648/29893/7153/6117/63979/56154/56907/192670/83990/10592/29988/1761/27229/10097/50511/675…	146
GO:0007093	mitotic cell cycle checkpoint signaling	83/8285	127/14199	0.0634871	0.704395	0.683472	7756/672/4361/54908/7175/1112/9319/55743/54962/51512/10403/8555/4998/9183/51720/51776/63967/990/4436/51322/84861/79791/4683/51343/80279/595/7272/900/79858/25949/1063/6118/9587/7517/55795/56984/65975/27183/891/324/51347/4193/55755/90381/7157/51514/2177/51143/472/1111/8091/144715/9184/7508/146956/701/9577/29980/84142/11073/4085/5347/81620/55159/8738/699/983/5883/55055/348654/9212/11200/9735/51065/7…	83
GO:0014855	striated muscle cell proliferation	40/8285	58/14199	0.0639085	0.704395	0.683472	8837/3720/2296/2263/7049/26281/7161/4208/3776/7042/3717/2254/7472/7046/657/5573/2735/1432/3836/6909/23493/2660/2247/9686/84466/26011/60485/284/2047/861/57057/3516/23414/983/79647/147912/2066/205428/9241/196528	40
GO:0010718	positive regulation of epithelial to mesenchymal transition	33/8285	47/14199	0.0644017	0.704395	0.683472	3670/25937/2296/10979/7042/25805/655/2146/7046/2022/4192/90/7043/7291/152007/6615/10439/4017/6386/4089/6934/7074/10630/57057/4088/1499/8313/4087/8092/80139/283149/3066/2475	33
GO:0016574	histone ubiquitination	33/8285	47/14199	0.0644017	0.704395	0.683472	23028/23304/7319/55100/10075/84678/51322/9810/51366/4591/1911/9025/6500/11315/7320/23326/1643/57332/9320/56254/84108/8450/165918/5896/123169/648/7324/7334/23512/84333/54880/10336/9646	33
GO:0031146	SCF-dependent proteasomal ubiquitin-dependent protein catabolic process	33/8285	47/14199	0.0644017	0.704395	0.683472	26224/25937/8454/23291/9978/79791/55101/8453/84961/26268/26235/6500/26270/9928/26234/55336/8451/6502/64839/81545/196394/26272/25827/80028/8450/54461/222235/126433/254170/8945/8065/144699/283807	33
GO:0051972	regulation of telomerase activity	33/8285	47/14199	0.0644017	0.704395	0.683472	11284/5588/23293/7520/3320/79977/4216/8550/3326/5594/143/10728/10575/4751/6950/3181/25913/1736/9314/4609/3184/7157/4931/79618/7013/140609/10576/1499/25849/9212/10715/54984/100134934	33
GO:0006739	NADP metabolic process	24/8285	33/14199	0.0644081	0.704395	0.683472	65220/51071/4199/8514/57103/4200/2645/83594/23530/25796/2330/3417/7157/5226/10840/25819/133686/22934/7086/25961/5223/6888/23729/6120	24
GO:0009225	nucleotide-sugar metabolic process	24/8285	33/14199	0.0644081	0.704395	0.683472	5238/2530/23483/5372/64841/55757/7358/2762/80146/6675/23443/4245/9945/56886/5373/55790/10020/51005/2135/124872/7360/4351/2592/8505	24
GO:0036294	cellular response to decreased oxygen levels	86/8285	132/14199	0.0653224	0.704395	0.683472	8837/5291/28996/5165/6095/5743/2023/57103/1906/3776/23411/9463/3162/3091/6547/655/51378/5230/10397/665/51142/867/7422/2030/8614/80315/26355/2034/2043/4985/2309/1788/25950/7291/5740/50809/2792/468/112399/5468/7428/9475/29979/4193/83990/6326/4609/84709/7009/9520/7157/5366/207/890/101/5163/79723/56776/571/9131/6781/7015/1536/538/360/7248/219736/55662/4824/10449/3516/5581/596/10869/79625/947/6546/365…	86
GO:0006338	chromatin remodeling	141/8285	222/14199	0.0655114	0.704395	0.683472	3720/9031/22955/51773/57504/6602/9682/9759/53615/6605/5927/64431/60/11176/6595/10847/7994/546/3183/11198/55506/27443/57680/9675/79913/6594/5931/23081/2625/10360/2648/2145/6830/1108/29915/25842/9025/9555/8850/3065/10765/1810/8289/23314/6418/3070/11335/55355/29994/84181/8970/8242/8089/50809/6597/23030/54617/3169/9557/3021/4678/22880/10541/4609/3159/50511/6601/5925/23476/473/23421/81611/257218/7403/…	141
GO:0030111	regulation of Wnt signaling pathway	190/8285	303/14199	0.0667147	0.704395	0.683472	440193/3670/25937/54764/25960/55789/11063/5218/65125/10076/7089/259266/2263/55593/57560/55737/79960/5663/2932/51701/25805/25/10042/9978/57680/6789/54994/1457/55612/6907/2010/2254/8312/6299/6788/51366/57664/5518/1749/857/2887/6424/2737/10927/7091/23189/80351/22943/219771/54894/64750/90410/4790/4192/2735/81029/1432/8724/5754/9096/9037/5515/1452/27031/3836/7474/10297/3485/9736/3065/79971/81847/2309/…	190
GO:0070198	protein localization to chromosome, telomeric region	22/8285	30/14199	0.0668608	0.704395	0.683472	7520/546/80351/9555/10575/6950/25913/54552/1736/7014/10574/675/7013/22948/152485/10694/7203/7015/10576/54386/545/54984	22
GO:0090114	COPII-coated vesicle budding	22/8285	30/14199	0.0668608	0.704395	0.683472	8452/25956/56681/10959/10484/10483/9218/10802/10342/22937/59349/9217/128637/22872/1453/9919/51128/375056/6396/10972/3638/10016	22
GO:0090162	establishment of epithelial cell polarity	22/8285	30/14199	0.0668608	0.704395	0.683472	9265/4649/387/23332/4983/2195/55612/284217/23094/9267/90410/5754/64083/7474/3280/23150/4478/56288/55691/382/123016/85302	22
GO:1900180	regulation of protein localization to nucleus	81/8285	124/14199	0.0670459	0.704395	0.683472	26022/2534/25937/999/1495/7175/3843/25885/7037/10979/5743/5663/2932/55696/57506/3326/3717/55612/51366/2737/7016/51684/80279/1432/51715/705/1894/10575/7341/11315/6950/51569/23435/1736/9113/5901/9201/29969/10574/2752/11143/23650/83666/53371/207/4931/142/26524/22948/26272/9531/7545/284/10694/23400/7203/7015/9221/10576/5347/4088/11142/51068/25942/983/166614/5569/81603/51574/9500/3059/5587/6612/4771/4…	81
GO:0007171	activation of transmembrane receptor protein tyrosine kinase activity	8285-10-01	12/14199	0.0671936	0.704395	0.683472	1136/51378/29990/1950/1609/56034/284/3084/6886/1946	10
GO:0016446	somatic hypermutation of immunoglobulin genes	8285-10-01	12/14199	0.0671936	0.704395	0.683472	10721/5423/4292/4436/25939/2956/5395/8888/27343/9156	10
GO:0036444	calcium import into the mitochondrion	8285-10-01	12/14199	0.0671936	0.704395	0.683472	55013/63933/10367/79085/10939/5664/286097/90550/221154/7416	10
GO:0038203	TORC2 signaling	8285-10-01	12/14199	0.0671936	0.704395	0.683472	55593/9894/79109/3071/79899/143686/64798/23387/253260/94056	10
GO:0046618	xenobiotic export	8285-10-01	12/14199	0.0671936	0.704395	0.683472	10928/1244/5243/127700/540/55244/6565/21/5174/6584	10
GO:0046831	regulation of RNA export from nucleus	8285-10-01	12/14199	0.0671936	0.704395	0.683472	54888/7175/6830/11052/22916/55051/10657/9972/1660/29072	10
GO:0051573	negative regulation of histone H3-K9 methylation	8285-10-01	12/14199	0.0671936	0.704395	0.683472	23028/672/9682/1789/23411/23081/55818/1786/55693/5079	10
GO:0061620	glycolytic process through glucose-6-phosphate	8285-10-01	12/14199	0.0671936	0.704395	0.683472	5214/2023/2645/2584/3607/5211/5213/3098/83440/221937	10
GO:0070202	regulation of establishment of protein localization to chromosome	8285-10-01	12/14199	0.0671936	0.704395	0.683472	10575/6950/1736/10574/7013/22948/10694/7203/23514/10576	10
GO:0090309	positive regulation of DNA methylation-dependent heterochromatin assembly	8285-10-01	12/14199	0.0671936	0.704395	0.683472	1786/22880/51535/83852/9869/23272/80063/55729/55196/54737	10
GO:0090646	mitochondrial tRNA processing	8285-10-01	12/14199	0.0671936	0.704395	0.683472	60528/54802/51095/9692/51654/57570/25821/55006/54931/80324	10
GO:1904350	regulation of protein catabolic process in the vacuole	8285-10-01	12/14199	0.0671936	0.704395	0.683472	55737/4036/51257/55353/975/4035/3949/79589/23400/256471	10
GO:1904667	negative regulation of ubiquitin protein ligase activity	8285-10-01	12/14199	0.0671936	0.704395	0.683472	6224/26271/9532/6209/6125/9349/6135/6167/4085/6201	10
GO:0009185	ribonucleoside diphosphate metabolic process	68/8285	103/14199	0.067738	0.704395	0.683472	204/3479/50484/954/5214/5315/9759/2023/1739/51548/57103/5236/8671/5663/260425/2033/3091/5230/4967/51422/2645/203/2584/230/2597/7167/7372/9414/4354/4907/4609/9611/3607/5211/351/8573/8473/50808/1740/5213/26289/221264/136332/80201/3098/195827/5207/83440/51727/5563/221937/2203/11164/6240/6774/3643/5223/6241/51341/55526/26137/5571/5465/387712/9583/55753/131870/79873	68
GO:0072583	clathrin-dependent endocytosis	31/8285	44/14199	0.0678075	0.704395	0.683472	163/1175/5291/9892/8301/8527/8976/9094/60682/3676/9829/84251/1211/3092/9026/9873/54874/55589/6457/1213/57720/115548/1173/133308/55788/2580/23396/29978/50618/22876/6453	31
GO:0072001	renal system development	176/8285	280/14199	0.068274	0.704395	0.683472	56603/8837/3207/9244/163/25937/23279/8100/84062/57545/50484/11174/79810/2296/10758/639/29927/2263/387/55746/23210/2736/38/1739/5076/5915/8516/7161/1286/384/4208/4036/51668/10269/285/7042/5125/8829/162/11020/655/6299/23322/1512/2737/7046/2625/2253/90410/7466/7704/23371/57122/6492/5754/7422/9096/4090/27031/7474/3280/93/9784/6772/6382/2043/51107/1063/5311/11064/3070/317/157506/3764/847/80114/3227/66…	176
GO:0002183	cytoplasmic translational initiation	20/8285	27/14199	0.0691073	0.704395	0.683472	1975/54505/8891/8668/8661/1981/8894/1968/1939/10480/1974/4690/1973/7884/56339/5936/255308/51441/2475/28985	20
GO:0003272	endocardial cushion formation	20/8285	27/14199	0.0691073	0.704395	0.683472	7042/655/7046/2022/657/2253/653/90/6909/6615/6926/23493/4089/4487/57057/55273/3516/6091/9241/6092	20
GO:0007026	negative regulation of microtubule depolymerization	20/8285	27/14199	0.0691073	0.704395	0.683472	89795/23332/22974/4281/11075/10297/23271/146057/2258/157922/324/26586/57159/10300/23122/6314/58526/50810/79929/10519	20
GO:0030851	granulocyte differentiation	20/8285	27/14199	0.0691073	0.704395	0.683472	6688/634/54997/6729/79576/25979/5914/8546/8451/3930/861/6886/2194/84522/6670/10221/2624/161882/3059/84456	20
GO:0055023	positive regulation of cardiac muscle tissue growth	20/8285	27/14199	0.0691073	0.704395	0.683472	3479/2263/7049/1906/4208/2254/7472/657/2735/1432/6909/10038/23493/2247/9472/57057/3516/23414/983/2066	20
GO:0060218	hematopoietic stem cell differentiation	20/8285	27/14199	0.0691073	0.704395	0.683472	23376/2296/5610/83737/7520/54517/25/9739/1021/3313/7157/1636/6886/56339/4300/2131/3214/51441/10443/5591	20
GO:0090659	walking behavior	20/8285	27/14199	0.0691073	0.704395	0.683472	1497/58524/28996/10269/26090/2743/27429/2043/23287/4864/409/6323/7545/7345/55074/2636/2395/55636/1600/6900	20
GO:1901798	positive regulation of signal transduction by p53 class mediator	20/8285	27/14199	0.0691073	0.704395	0.683472	6224/80279/1655/51147/6209/9521/9349/4609/5366/6167/472/22925/4487/161742/7314/6201/545/3090/10614/200734	20
GO:2000765	regulation of cytoplasmic translation	20/8285	27/14199	0.0691073	0.704395	0.683472	7812/8531/4904/5315/26986/2332/22849/80315/85451/10492/1660/3184/3192/4690/10642/56339/7555/10605/51441/2475	20
GO:0002562	somatic diversification of immune receptors via germline recombination within a single locus	43/8285	63/14199	0.0692843	0.704395	0.683472	2067/7158/5423/6929/7037/4292/9984/55183/6932/4436/4683/51010/6830/7468/51111/9025/4437/2956/7292/54537/78996/64919/80762/84787/23075/3586/121260/3329/9730/472/7518/64421/22976/165918/3148/5896/200558/9156/3981/79915/56941/118460/5591	43
GO:0016444	somatic cell DNA recombination	43/8285	63/14199	0.0692843	0.704395	0.683472	2067/7158/5423/6929/7037/4292/9984/55183/6932/4436/4683/51010/6830/7468/51111/9025/4437/2956/7292/54537/78996/64919/80762/84787/23075/3586/121260/3329/9730/472/7518/64421/22976/165918/3148/5896/200558/9156/3981/79915/56941/118460/5591	43
GO:0051897	positive regulation of protein kinase B signaling	58/8285	87/14199	0.0696543	0.704395	0.683472	799/5291/10979/56005/2260/3320/4036/50507/57091/114882/3326/23551/4150/6788/56917/4233/7046/2022/2625/708/9037/1839/57142/3488/11315/2152/9270/5290/3092/9518/10253/7295/7057/2247/1950/3480/409/1956/92140/6934/5795/3688/101/284/3084/4486/253260/219736/5245/5747/3643/3059/2621/388121/5154/8904/2876/4157	58
GO:1902882	regulation of response to oxidative stress	53/8285	79/14199	0.0701056	0.704395	0.683472	2534/3082/2530/84883/5151/27244/5978/23411/25/25793/3091/655/4233/3315/135112/8382/9555/27429/11315/6421/2309/79109/10131/468/2686/2643/51765/29979/50640/3586/7295/10516/6647/7226/207/4170/142/143686/23657/8321/55074/7248/219736/9529/5598/1499/79772/5074/5071/5034/120892/1719/2876	53
GO:0018107	peptidyl-threonine phosphorylation	71/8285	108/14199	0.070256	0.704395	0.683472	8798/1195/65125/28996/6093/1459/815/2011/3093/2932/51701/5594/7443/655/1457/85366/8312/8767/51422/7046/5599/10114/7272/7474/1981/90/5585/8445/4294/51763/9475/91/51719/10253/1950/5170/57521/351/207/8444/8476/9730/1609/817/6872/56288/85456/1111/5578/1859/808/219736/161742/5579/5347/983/596/143941/156/8851/8408/29110/5587/8558/120892/200734/27347/801/9578/2475/5591	71
GO:0022412	cellular process involved in reproduction in multicellular organism	197/8285	315/14199	0.0705179	0.704395	0.683472	56603/5048/928/2067/3479/23304/54888/11063/64848/2296/639/259266/6196/9319/27125/23291/4292/1906/6595/10403/79670/23139/64395/6790/5990/1738/285/4436/6732/9463/11144/6305/56853/22862/147700/268/81492/6795/5518/79846/5764/79989/7046/9148/57178/5889/5414/6198/7704/4192/84519/26271/9025/9444/7272/8382/4090/152015/90/55818/6654/79084/2309/84071/7320/27030/81892/1788/84930/23397/81930/10549/80025/8195…	197
GO:0030177	positive regulation of Wnt signaling pathway	87/8285	134/14199	0.0707549	0.704395	0.683472	54764/25960/55789/65125/259266/2263/55737/25805/25/54994/1457/6907/2254/6299/51366/57664/1749/857/6424/10927/23189/80351/22943/64750/4790/81029/5754/9037/7474/9736/79971/81847/7320/8434/79809/6659/23499/6597/1455/22881/23213/9101/2247/1950/85407/1453/63977/245973/84870/1956/2719/340419/1456/3087/79705/27123/6497/1896/27185/57326/7015/65268/51339/4088/51704/1613/3516/4920/53944/9839/55031/4300/860…	87
GO:0001822	kidney development	171/8285	272/14199	0.0709689	0.704395	0.683472	56603/8837/3207/9244/163/25937/23279/8100/84062/57545/50484/11174/79810/2296/10758/639/29927/2263/387/55746/23210/2736/38/1739/5076/5915/8516/7161/1286/384/4208/4036/51668/10269/285/7042/5125/8829/162/11020/655/6299/23322/1512/2737/7046/2625/2253/90410/7466/7704/23371/57122/6492/5754/7422/4090/27031/7474/3280/93/9784/6772/6382/2043/51107/1063/5311/11064/3070/317/157506/3764/847/80114/3227/6659/19…	171
GO:0033598	mammary gland epithelial cell proliferation	18/8285	24/14199	0.0709941	0.704395	0.683472	5594/3202/2625/595/7474/57142/3398/10765/6239/5469/675/90780/8945/6091/80139/128239/11331/2876	18
GO:0060384	innervation	18/8285	24/14199	0.0709941	0.704395	0.683472	3670/10371/1906/8829/3676/1889/5582/23213/494470/2561/1909/5457/4884/55636/55959/104/4914/9860	18
GO:0070861	regulation of protein exit from endoplasmic reticulum	18/8285	24/14199	0.0709941	0.704395	0.683472	27248/56681/55741/111089941/9777/975/55754/9695/337867/9648/6653/51128/9024/55432/7327/3638/258010/51465	18
GO:1902175	regulation of oxidative stress-induced intrinsic apoptotic signaling pathway	18/8285	24/14199	0.0709941	0.704395	0.683472	23411/3091/3315/8382/27429/11315/6421/10131/29979/6647/207/4170/142/9529/5598/5071/5034/2876	18
GO:1904666	regulation of ubiquitin protein ligase activity	18/8285	24/14199	0.0709941	0.704395	0.683472	6224/8555/10059/51343/26271/9532/6500/6209/84930/6125/9349/6135/6167/4085/8945/5347/6201/11065	18
GO:0001325	formation of extrachromosomal circular DNA	8285-12-01	15/14199	0.0712741	0.704395	0.683472	2067/7520/4683/7517/7014/1763/7013/7486/9156/79008/84464/641	12
GO:0002070	epithelial cell maturation	8285-12-01	15/14199	0.0712741	0.704395	0.683472	5991/3091/3202/29842/3169/6496/2697/137964/84283/4825/10116/7298	12
GO:0007000	nucleolus organization	8285-12-01	15/14199	0.0712741	0.704395	0.683472	1663/57602/11176/23411/6223/84172/10436/23378/9221/23133/57673/5253	12
GO:0031453	positive regulation of heterochromatin assembly	8285-12-01	15/14199	0.0712741	0.704395	0.683472	7175/1786/22880/51535/83852/9869/23272/80063/25942/55729/55196/54737	12
GO:0043518	negative regulation of DNA damage response, signal transduction by p53 class mediator	8285-12-01	15/14199	0.0712741	0.704395	0.683472	23028/960/23411/5716/55702/7291/6615/4193/64844/8444/1859/754	12
GO:0044539	long-chain fatty acid import into cell	8285-12-01	15/14199	0.0712741	0.704395	0.683472	10998/208/6198/6513/2181/80763/2058/7057/11001/207/10999/8660	12
GO:0046500	S-adenosylmethionine metabolic process	8285-12-01	15/14199	0.0712741	0.704395	0.683472	84245/27430/191/262/4552/79066/58478/51074/4143/23382/10768/4144	12
GO:0051315	attachment of mitotic spindle microtubules to kinetochore	8285-12-01	15/14199	0.0712741	0.704395	0.683472	10403/81929/1062/83540/1060/91272/3192/81620/79003/51115/9212/283489	12
GO:0070131	positive regulation of mitochondrial translation	8285-12-01	15/14199	0.0712741	0.704395	0.683472	51654/708/23107/79072/84300/55005/285367/26995/54931/51335/28958/81554	12
GO:0090399	replicative senescence	8285-12-01	15/14199	0.0712741	0.704395	0.683472	51384/2067/7157/1029/472/1111/22925/7015/7486/545/11200/4311	12
GO:0090656	t-circle formation	8285-12-01	15/14199	0.0712741	0.704395	0.683472	2067/7520/4683/7517/7014/1763/7013/7486/9156/79008/84464/641	12
GO:0090737	telomere maintenance via telomere trimming	8285-12-01	15/14199	0.0712741	0.704395	0.683472	2067/7520/4683/7517/7014/1763/7013/7486/9156/79008/84464/641	12
GO:0120263	positive regulation of heterochromatin organization	8285-12-01	15/14199	0.0712741	0.704395	0.683472	7175/1786/22880/51535/83852/9869/23272/80063/25942/55729/55196/54737	12
GO:1904380	endoplasmic reticulum mannose trimming	8285-12-01	15/14199	0.0712741	0.704395	0.683472	55741/111089941/55757/80267/9695/56886/91445/10299/267/11236/11253/7844	12
GO:1904424	regulation of GTP binding	8285-12-01	15/14199	0.0712741	0.704395	0.683472	26073/5909/79822/8874/4233/9750/1452/2043/1965/203228/26086/57326	12
GO:1905269	positive regulation of chromatin organization	8285-12-01	15/14199	0.0712741	0.704395	0.683472	7175/1786/22880/51535/83852/9869/23272/80063/25942/55729/55196/54737	12
GO:2000052	positive regulation of non-canonical Wnt signaling pathway	8285-12-01	15/14199	0.0712741	0.704395	0.683472	25/57664/22943/81029/7474/22881/85407/1453/84870/2719/4300/1454	12
GO:0006418	tRNA aminoacylation for protein translation	29/8285	41/14199	0.0713568	0.704395	0.683472	6301/55699/16/124454/2617/6897/5917/1615/10056/10352/55157/57505/57470/51520/4677/8565/79587/2058/79731/51067/7453/80222/10667/57038/3035/123283/3376/92935/80755	29
GO:0009394	2'-deoxyribonucleotide metabolic process	29/8285	41/14199	0.0713568	0.704395	0.683472	50484/51733/25939/4968/1716/84618/23583/30833/1854/8930/1635/55270/6996/79661/26289/252969/221264/132/1633/7498/6240/1841/6241/7298/1806/100/131870/56953/79873	29
GO:0032206	positive regulation of telomere maintenance	36/8285	52/14199	0.0713857	0.704395	0.683472	2067/4361/11284/5588/51548/7520/546/4216/8550/5594/4683/80351/10111/10575/4751/6950/3181/25913/1736/7014/3178/10574/3184/79618/472/22948/140609/26272/10694/7203/10576/1499/545/9212/79008/84464	36
GO:1903364	positive regulation of cellular protein catabolic process	98/8285	152/14199	0.0716888	0.705623	0.684663	2729/54467/114881/51667/9604/8554/25897/5601/8975/4287/55737/28951/55743/23609/51548/5663/3320/4036/2932/5705/6790/25831/7430/51257/9978/5716/2332/8312/9810/6449/51343/857/1855/1075/975/9532/1452/7341/127544/26234/440730/4035/3949/79589/29979/23287/84900/4193/153090/255488/5962/55212/1950/91445/144165/160418/1453/207/64326/9686/154214/4478/6872/9781/57630/153769/10444/5701/79699/7805/27185/25898/…	98
GO:0050821	protein stabilization	109/8285	170/14199	0.0718282	0.705623	0.684663	3920/7756/3479/8863/57602/8975/483/6400/23032/3320/51701/54997/3326/89781/2033/9894/6789/9770/6907/11040/6788/11140/1855/23560/5216/7466/1410/10728/1389/2597/9532/11235/57142/10575/7341/2043/11315/64175/56912/335/1385/7320/6950/6125/8239/5190/6659/9349/56926/3092/9026/57663/7428/8774/902/10574/83548/64844/6812/23162/7157/6135/3329/287/6872/9919/22948/60485/9531/84897/158297/2776/10694/23515/5824/…	109
GO:0046823	negative regulation of nucleocytoplasmic transport	16/8285	21/14199	0.0722827	0.705623	0.684663	7175/5905/55612/51684/51715/7341/11315/51569/9972/29969/7295/580/284/11142/5569/4763	16
GO:0000028	ribosomal small subunit assembly	14/8285	18/14199	0.07259	0.705623	0.684663	7520/6193/6223/6209/51081/6208/3921/6169/6232/64963/51065/27341/5822/5591	14
GO:0006851	mitochondrial calcium ion transmembrane transport	14/8285	18/14199	0.07259	0.705623	0.684663	55013/63933/6547/9512/10367/79085/10939/5664/286097/90550/221154/3954/168620/7416	14
GO:0071786	endoplasmic reticulum tubular network organization	14/8285	18/14199	0.07259	0.705623	0.684663	65055/10890/22931/55161/57142/22930/25782/64225/51308/10313/80856/118813/221035/23204	14
GO:1902018	negative regulation of cilium assembly	14/8285	18/14199	0.07259	0.705623	0.684663	4134/10198/2665/9738/7016/4117/57489/84260/115704/51256/107080638/79598/8558/347240	14
GO:1902473	regulation of protein localization to synapse	14/8285	18/14199	0.07259	0.705623	0.684663	9912/5590/56850/1739/2239/51104/1855/7474/5906/23096/102/160622/1605/10082	14
GO:1904752	regulation of vascular associated smooth muscle cell migration	14/8285	18/14199	0.07259	0.705623	0.684663	387/4208/2254/3488/85440/9732/7168/93649/2768/80005/9510/7015/538/5592	14
GO:0045732	positive regulation of protein catabolic process	140/8285	221/14199	0.0727733	0.706237	0.685259	2729/54467/114881/51667/9604/6642/8554/25897/23327/5601/8975/4287/55737/4734/28951/55743/7879/23609/51548/4898/83737/5663/3320/4036/2932/57531/10075/5705/6790/25831/7430/51257/25807/27352/9978/1457/5716/140462/2332/8312/9810/6449/51343/857/1855/64750/152503/1075/975/9532/2822/1452/7474/868/10297/7341/127544/26234/440730/3416/11059/4035/23163/3949/51429/80762/79589/324/29979/23287/84900/4193/15309…	140
GO:0016049	cell growth	269/8285	435/14199	0.0730527	0.70778	0.686757	51265/5048/54879/6792/728642/9043/7869/2137/3479/22902/2273/7414/6098/23327/9564/1535/23105/26999/55540/131566/11054/9423/5588/57609/387/5590/6857/51447/9175/54825/7251/2023/10371/10512/79960/4133/1906/83737/634/22999/6595/3320/23136/54437/2932/9706/6790/9962/84678/393/8425/5459/4897/57556/1808/7042/3326/23411/25/8829/84861/1399/51199/10110/57446/23394/1457/57144/5716/5931/58189/51760/23678/8725/…	269
GO:0051893	regulation of focal adhesion assembly	41/8285	60/14199	0.0733524	0.70835	0.68731	26073/7414/2042/22998/9748/387/6093/9448/10979/23332/25/8829/9647/1845/23603/56940/7422/57669/9270/23499/5786/9475/5879/7057/54828/51057/90102/5795/23122/7248/4088/1613/11170/5747/3987/79834/71/1946/6281/8861/342184	41
GO:0090109	regulation of cell-substrate junction assembly	41/8285	60/14199	0.0733524	0.70835	0.68731	26073/7414/2042/22998/9748/387/6093/9448/10979/23332/25/8829/9647/1845/23603/56940/7422/57669/9270/23499/5786/9475/5879/7057/54828/51057/90102/5795/23122/7248/4088/1613/11170/5747/3987/79834/71/1946/6281/8861/342184	41
GO:0060411	cardiac septum morphogenesis	46/8285	68/14199	0.0742023	0.715383	0.694134	3670/2263/7049/10512/4036/7042/8829/655/8701/7046/2022/657/2253/7468/653/9421/7474/3280/90/8828/6909/6659/53834/6926/23493/4193/4091/7157/4089/9353/60485/8321/9249/64783/57057/23462/3516/6091/23414/55636/161882/9241/6586/6092/55742/659	46
GO:0016482	cytosolic transport	104/8285	162/14199	0.0743592	0.715722	0.694463	8938/9043/54497/6642/7260/55773/9341/84067/23041/7813/55737/8218/7879/27252/4133/5289/23085/23033/2060/8898/27131/55614/7430/29911/83874/5594/10490/10139/8411/25963/8677/84079/10652/57589/8729/9527/8724/51652/8934/51552/400/80148/9559/55297/9367/22863/54832/10749/25938/58533/547/9779/57533/55207/6272/51361/10228/9648/6653/5962/10097/23317/55435/8499/9905/1213/51542/5868/4478/29934/5305/112936/143…	104
GO:0008286	insulin receptor signaling pathway	64/8285	97/14199	0.0758359	0.728743	0.707098	55971/5286/9564/5588/5590/64710/6720/2932/27131/114882/10580/23411/64397/208/2887/23189/6198/2549/23371/9847/2822/896/2888/3416/5290/57727/51763/5786/8471/324/1019/29988/6653/8412/2660/3480/207/55023/8473/1979/143686/140710/5305/2308/2241/26060/4690/10603/80318/252983/5579/81565/79837/10999/23235/3643/6599/5771/1176/5781/9021/8660/5770/5167	64
GO:0016236	macroautophagy	187/8285	299/14199	0.0762458	0.730819	0.709111	26073/3920/27072/51534/1634/23376/823/9821/8100/535/11345/23274/51606/55187/57602/9474/11178/81671/55102/55737/4734/7251/7879/5289/57103/27244/5663/79876/9706/25978/51510/10075/27131/10558/55763/23256/51322/23411/51100/9342/3162/51382/10490/9517/3091/128866/55613/80183/8767/665/11140/10392/6009/5599/90410/55626/2597/51715/7957/8992/8723/523/27429/51652/22930/5768/9927/149371/3964/25782/9525/51569…	187
GO:0007411	axon guidance	138/8285	218/14199	0.0763004	0.730819	0.709111	23077/2115/2534/11313/3730/7869/3670/1272/9369/7204/2042/3909/3918/9423/5588/4756/2046/1400/2736/10371/10512/5362/23032/1906/4983/285220/54437/1947/5459/4897/57556/1808/8829/9252/655/284217/10857/7976/6324/1749/3199/2737/9355/1855/2625/6387/219699/5818/7422/9037/90249/7474/6152/5361/6654/2043/1889/9048/8828/8609/89884/1948/64919/389549/1123/23022/55558/2045/10505/10154/5879/347733/80031/658/49447…	138
GO:0071560	cellular response to transforming growth factor beta stimulus	141/8285	223/14199	0.0769682	0.736016	0.714154	8837/1387/2534/11171/2530/3309/4052/28996/6688/2263/7049/10979/8516/1906/4208/51701/5829/8425/2734/7042/25805/3326/23411/25/1399/10454/2033/54976/55612/8312/9141/857/7472/7046/2022/657/57178/64081/64750/83891/9404/55553/112744/26036/56940/4015/2908/4090/7474/57669/90/9480/4053/7043/4093/317/56937/8239/4435/57045/58533/9518/9113/5468/6660/9315/6885/269/9392/55198/10253/7080/6498/6386/7057/4091/266…	141
GO:0007548	sex differentiation	144/8285	228/14199	0.0775985	0.737087	0.715193	2288/3207/7812/2067/10046/5926/1495/3309/4254/51742/2296/4438/8531/58524/51665/259266/10371/4036/546/7042/4436/23411/1399/23598/11144/2491/22862/2254/6299/23205/268/3209/4521/7046/2625/59338/657/2253/595/867/57122/653/7422/4090/7337/7474/6382/1718/2309/157506/81930/92/10549/3623/8195/128637/8894/117154/3239/599/9667/5914/3021/4678/3295/7482/10468/192670/5156/6926/269/83990/2516/4609/152006/1761/2…	144
GO:0071559	response to transforming growth factor beta	144/8285	228/14199	0.0775985	0.737087	0.715193	8837/1387/2534/11171/2530/3309/4052/28996/6688/2263/6093/7049/10979/8516/1906/4208/51701/5829/8425/2734/7042/25805/3326/23411/25/1399/10454/2033/54976/55612/8312/9141/857/7472/7046/2022/657/57178/64081/64750/83891/9404/55553/112744/26036/56940/4015/2908/4090/7474/57669/90/9480/4053/7043/4093/317/56937/8239/4435/57045/58533/9518/9113/5468/9475/6660/9315/6885/269/9392/55198/10253/7080/6498/6386/705…	144
GO:0000381	regulation of alternative mRNA splicing, via spliceosome	39/8285	57/14199	0.0776861	0.737087	0.715193	10181/10659/9967/10179/55796/54715/5978/10521/56853/2332/1655/83989/8087/58517/10657/84081/10656/84872/3178/6434/10150/4857/60677/10658/10284/4154/3192/135295/4116/55225/64783/146713/5936/51341/8241/54033/10921/29890/9939	39
GO:2001021	negative regulation of response to DNA damage stimulus	54/8285	81/14199	0.0781457	0.737087	0.715193	23028/2067/637/960/10721/54929/7158/7515/9984/55183/23411/8563/23347/5716/51366/55702/6387/9400/26271/4968/54537/7291/78996/6615/92797/79000/7014/7178/84893/4193/64844/8444/57007/6188/8091/9320/1859/115004/220042/254225/55031/598/596/80311/2072/116028/79915/64110/2187/754/11200/55010/51616/2074	54
GO:0031330	negative regulation of cellular catabolic process	147/8285	233/14199	0.078193	0.737087	0.715193	26073/7812/3082/11345/54888/23274/9967/23118/57602/10758/8531/11178/28996/4904/1994/9682/6093/55737/5774/26986/1459/32/27074/57103/4983/5663/8898/2521/23256/3183/51322/3326/1153/84861/3162/1457/128866/9097/55613/2332/9683/8925/55353/6449/4233/57589/51684/23185/80279/1982/1432/2822/11044/1611/1981/2043/5768/11315/3953/81892/55051/148/23435/51538/5290/6125/3834/9349/5582/79066/7538/84074/1736/57533…	147
GO:0150116	regulation of cell-substrate junction organization	44/8285	65/14199	0.0786362	0.737087	0.715193	26073/7414/2042/22998/9748/387/6093/9448/10979/23332/25/8829/9647/1845/23603/56940/7422/57669/9270/23499/5786/9475/5879/7057/54828/51057/9922/90102/5795/23122/382/7248/4088/10982/1613/11170/5747/3987/79834/71/1946/6281/8861/342184	44
GO:0009123	nucleoside monophosphate metabolic process	49/8285	73/14199	0.078702	0.737087	0.715193	204/159/1739/22978/260425/139596/51733/5634/3614/203/10591/7372/1716/271/84618/9414/30833/10606/1854/1635/83549/4354/272/4907/471/7371/8573/5631/50808/1740/26289/221264/136332/132/1633/7498/51727/8833/318/3251/7084/1841/7298/3615/122622/1806/100/56953/158	49
GO:0071229	cellular response to acid chemical	49/8285	73/14199	0.078702	0.737087	0.715193	2729/2534/23304/58528/1535/3843/27244/84861/7494/22849/9148/8649/7422/80315/5311/1788/53335/5290/599/23677/1786/51520/5156/4609/3184/57521/1291/56034/1956/4915/6935/143686/197131/824/1536/538/26012/552/80310/598/153129/5339/1282/389541/3182/1288/2475/6494/729438	49
GO:0097061	dendritic spine organization	49/8285	73/14199	0.078702	0.737087	0.715193	9912/5048/2534/27067/84062/816/25791/55737/5063/8898/9463/5641/8976/51104/1855/23316/7337/85461/2043/547/1742/4076/3706/10097/22891/10152/8499/3480/375/9456/2047/7804/100528062/23181/10611/22871/1501/91752/26115/3643/5621/1072/8851/10196/120892/5649/26037/80823/2904	49
GO:0007095	mitotic G2 DNA damage checkpoint signaling	25/8285	35/14199	0.0788348	0.737087	0.715193	672/4361/1112/8555/51720/63967/4683/51343/80279/900/25949/51347/90381/51514/472/1111/8091/9577/29980/84142/11073/5347/983/79184/641	25
GO:0032205	negative regulation of telomere maintenance	25/8285	35/14199	0.0788348	0.737087	0.715193	2067/23293/7515/3183/4683/80351/10111/54464/25913/54552/7014/55226/3178/142/7013/472/3192/54386/5394/167227/2072/79008/84464/54984/100134934	25
GO:0045738	negative regulation of DNA repair	25/8285	35/14199	0.0788348	0.737087	0.715193	10721/7158/55183/23347/51366/9400/4968/54537/7291/78996/92797/79000/7014/84893/6188/8091/9320/115004/254225/80311/116028/64110/2187/55010/2074	25
GO:0050856	regulation of T cell receptor signaling pathway	25/8285	35/14199	0.0788348	0.737087	0.715193	634/7430/84174/1845/975/56940/868/8934/1997/10385/5819/149041/8915/8525/5795/6188/10666/7805/5621/10892/5771/5074/3932/100/8517	25
GO:1901998	toxin transport	25/8285	35/14199	0.0788348	0.737087	0.715193	535/3309/23428/23256/8829/9325/1759/22818/10575/8934/6950/10574/102/54545/22948/10694/9364/9619/200186/118429/7203/10576/84168/6580/9276	25
GO:0048255	mRNA stabilization	32/8285	46/14199	0.0797763	0.744705	0.722585	7812/9967/10758/8531/4904/1994/26986/2521/3183/1153/23185/1432/11044/23435/79066/7538/10492/1660/3184/25819/3192/10642/9261/2668/8313/10605/90806/10949/8241/54855/56478/373863	32
GO:0009135	purine nucleoside diphosphate metabolic process	62/8285	94/14199	0.0802786	0.747023	0.724834	204/3479/954/5214/5315/9759/2023/1739/51548/57103/5236/8671/5663/260425/2033/3091/5230/4967/51422/2645/203/2584/230/2597/7167/9414/4354/4907/4609/9611/3607/5211/351/8573/8473/50808/1740/5213/26289/221264/136332/80201/3098/195827/5207/83440/5563/221937/2203/6774/3643/5223/51341/55526/26137/5571/5465/387712/9583/55753/131870/79873	62
GO:0009179	purine ribonucleoside diphosphate metabolic process	62/8285	94/14199	0.0802786	0.747023	0.724834	204/3479/954/5214/5315/9759/2023/1739/51548/57103/5236/8671/5663/260425/2033/3091/5230/4967/51422/2645/203/2584/230/2597/7167/9414/4354/4907/4609/9611/3607/5211/351/8573/8473/50808/1740/5213/26289/221264/136332/80201/3098/195827/5207/83440/5563/221937/2203/6774/3643/5223/51341/55526/26137/5571/5465/387712/9583/55753/131870/79873	62
GO:0009260	ribonucleotide biosynthetic process	108/8285	169/14199	0.0807147	0.749894	0.72762	204/10165/60481/159/56474/2983/5165/80347/2182/2023/38/9605/32/108/1738/139596/11332/6576/5634/23417/4833/23205/2639/3614/51422/203/506/8382/7372/523/1716/8604/271/515/6785/113/8034/2181/514/51000/27109/80025/10606/83549/5538/47/5160/272/517/4609/109/471/60490/9061/29922/7371/55811/142/50808/51144/134145/1737/498/5163/2977/53354/26289/518/522/221264/1836/132/23181/115/51727/4880/8833/2982/79993/2…	108
GO:0060996	dendritic spine development	57/8285	86/14199	0.0817189	0.758027	0.735511	9912/5048/55236/27067/84062/23105/816/25791/5597/815/5063/5663/4208/2332/5802/8976/1855/22849/9148/1982/23316/7337/2043/547/10298/1742/4076/3706/10097/22891/10152/8499/9922/221935/50807/54149/2047/7804/100528062/23181/27185/10611/382/378/22871/1501/26115/653464/1072/8851/5062/10196/120892/5649/3066/26037/80823	57
GO:0000096	sulfur amino acid metabolic process	23/8285	32/14199	0.0827114	0.761047	0.738442	2729/1800/1373/84245/50507/4507/2678/4522/6611/4548/4552/4357/7263/1036/51380/58478/4594/51074/23657/4143/875/102724560/441024	23
GO:0042908	xenobiotic transport	23/8285	32/14199	0.0827114	0.761047	0.738442	340273/5244/10928/1244/5205/5243/8140/8714/55754/10057/127700/6513/9429/540/10257/55244/2697/6565/21/6573/5174/6580/6584	23
GO:0046473	phosphatidic acid metabolic process	23/8285	32/14199	0.0827114	0.761047	0.738442	51099/56895/1608/1606/5337/8527/63874/160851/8443/79575/23175/1607/84803/1609/8525/8526/137964/56894/51205/200879/253558/254531/149998	23
GO:0050654	chondroitin sulfate proteoglycan metabolic process	23/8285	32/14199	0.0827114	0.761047	0.738442	1634/64132/54928/9806/7358/29940/135152/3373/22856/55501/56548/55790/26229/83539/92370/133584/55454/79625/126792/51363/2131/50859/337876	23
GO:0051294	establishment of spindle orientation	23/8285	32/14199	0.0827114	0.761047	0.738442	5048/54908/4134/23291/3993/23332/10403/9183/3834/3996/10253/55755/6993/79648/3688/2697/10252/4085/81565/5347/89958/3064/137886	23
GO:0006513	protein monoubiquitination	52/8285	78/14199	0.082821	0.761047	0.738442	8452/8454/56852/7251/10075/84678/51322/84861/9978/9810/55284/54926/9148/4591/7323/329/867/6500/55120/59349/90025/7320/7706/55906/6737/1643/64844/51514/25827/56254/84108/2176/8450/165918/5896/123169/90850/648/81844/7324/7314/63893/84333/2187/54880/5071/10336/2175/57697/10210/9646/10016	52
GO:0070192	chromosome organization involved in meiotic cell cycle	42/8285	62/14199	0.0833714	0.764356	0.741652	9918/4361/5888/4438/55706/9319/4292/55063/546/11144/5518/5889/10111/10051/7320/27030/23397/151648/29893/56154/192670/83990/10592/2177/256006/7013/472/23310/701/151246/5885/23353/145645/699/339834/317761/10388/6847/100130958/100507650/283847/101928601	42
GO:1900407	regulation of cellular response to oxidative stress	47/8285	70/14199	0.083441	0.764356	0.741652	2534/3082/2530/84883/5151/5978/23411/25/25793/3091/655/4233/3315/135112/8382/27429/11315/6421/2309/79109/10131/468/2643/51765/29979/50640/3586/7295/10516/6647/7226/207/4170/142/23657/8321/55074/7248/9529/5598/1499/5074/5071/5034/120892/1719/2876	47
GO:0007265	Ras protein signal transduction	198/8285	318/14199	0.0841243	0.767485	0.744688	5898/9855/9912/9265/3479/10928/8452/57646/4254/5291/10787/9423/10565/387/6093/9448/51495/5337/9138/2782/4983/57531/8550/393/11069/7042/25/8829/4650/1399/27352/6655/394/5516/23370/22898/9266/10156/4233/3984/23189/2889/8729/8036/51195/3837/9267/55379/7126/9693/867/2305/8437/11021/9750/8936/57221/55914/5924/152015/6654/1718/55103/11315/5906/9927/117178/335/9928/440730/8727/79109/57706/148/9367/57826…	198
GO:0019692	deoxyribose phosphate metabolic process	30/8285	43/14199	0.0843433	0.767485	0.744688	51071/50484/51733/25939/4968/1716/84618/23583/30833/1854/8930/1635/55270/6996/79661/26289/252969/221264/132/1633/7498/6240/1841/6241/7298/1806/100/131870/56953/79873	30
GO:0021795	cerebral cortex cell migration	30/8285	43/14199	0.0843433	0.767485	0.744688	5048/23224/387/5663/3912/114327/2737/26468/57178/57142/2258/153090/9353/1956/7804/5194/27185/285025/23353/81565/1499/6091/653464/84750/1600/2290/8851/5454/5649/5455	30
GO:0045646	regulation of erythrocyte differentiation	30/8285	43/14199	0.0843433	0.767485	0.744688	6688/23774/3091/1021/3202/1432/60682/3313/6772/2309/92/3071/116151/5469/7538/2113/91/23456/11143/6886/3148/6774/7564/6777/2624/161882/677/9636/8861/5591	30
GO:0010638	positive regulation of organelle organization	279/8285	453/14199	0.0844351	0.767485	0.744688	996/5898/55971/10344/85477/57787/10178/9918/5329/1634/2067/1663/637/3479/10928/4361/6683/64429/8452/11284/7175/55187/5601/29945/10787/57143/22998/5588/387/6857/89795/55737/9948/10979/23332/3998/55160/6624/1739/10615/51548/1906/7520/55604/2932/546/4216/23259/10059/6790/8550/51433/5829/25/51100/8829/5594/9647/25793/51199/80821/3091/3055/22919/55512/9738/4683/11075/9141/208/4233/3209/8976/3984/7046/…	279
GO:0016072	rRNA metabolic process	163/8285	260/14199	0.0847683	0.769325	0.746473	115939/51096/1663/51106/23517/51602/57602/10885/6949/23016/2975/22894/51729/8602/8886/22803/51575/55506/23481/10521/5303/90459/10775/6217/6223/10927/51010/10360/23560/117246/55813/54433/11103/4839/23195/705/29102/9555/54464/8850/4691/2976/6209/84128/9014/79954/80135/54680/79033/387338/9330/55127/54853/11340/27340/2971/130916/6125/29960/79002/10199/10799/9329/84172/51119/10436/64768/92797/6597/790…	163
GO:0001824	blastocyst development	68/8285	104/14199	0.0858604	0.778035	0.754925	3479/8452/26469/7319/79728/9837/4683/2116/7046/23081/6830/10566/4848/705/9421/51639/57142/9927/4751/64168/23019/51119/10436/84660/9113/4678/54663/6498/9314/23168/80312/675/5045/123920/57677/285855/154197/54892/84296/63978/338596/1111/53918/9412/2551/84295/10361/149473/824/9318/81565/6137/6241/6670/79718/5890/54880/84871/7784/345630/27341/728661/100/7004/9646/91603/10443/100381270	68
GO:0032786	positive regulation of DNA-templated transcription, elongation	21/8285	29/14199	0.0866154	0.780069	0.756899	8621/9984/905/8812/11198/8563/8178/6830/10915/22936/55837/11143/23476/123169/51755/1499/6829/3150/22828/6827/2074	21
GO:0034260	negative regulation of GTPase activity	21/8285	29/14199	0.0866154	0.780069	0.756899	65125/10565/10959/51291/10156/8195/154796/23677/23143/10253/153090/5962/54828/409/23076/26086/10252/123016/7248/120892/11153	21
GO:0048536	spleen development	21/8285	29/14199	0.0866154	0.780069	0.756899	3720/54542/10758/5423/4791/55012/25/579/5585/55795/149041/1030/6868/10018/28982/64783/8772/3175/596/3214/5087	21
GO:0150117	positive regulation of cell-substrate junction organization	21/8285	29/14199	0.0866154	0.780069	0.756899	26073/6093/9448/10979/25/8829/9647/1845/7422/57669/9270/5879/9922/5795/382/7248/4088/10982/3987/6281/342184	21
GO:0002090	regulation of receptor internalization	35/8285	51/14199	0.0872342	0.782857	0.759603	84058/84062/88455/4983/8898/9463/79890/2332/6424/22943/7422/3208/1948/4289/9779/1742/967/54806/6386/84896/1950/409/375/26045/284/1173/6850/146395/3643/302/9863/29978/5336/124930/6311	35
GO:0071384	cellular response to corticosteroid stimulus	35/8285	51/14199	0.0872342	0.782857	0.759603	8837/3670/490/1906/5978/7023/3717/6198/2908/90/54206/2309/687/11335/7538/5901/1545/2660/9101/3480/6715/1977/498/678/10018/3192/9131/114907/6781/1636/11170/64754/677/7332/358	35
GO:0031400	negative regulation of protein modification process	283/8285	460/14199	0.0873242	0.782857	0.759603	2729/23028/5577/3720/9043/10157/1407/6224/57467/2534/672/9961/23376/25937/3082/259282/11284/84062/5291/9474/11338/3843/9682/6688/5590/6093/28951/7515/5927/7251/54431/2192/634/5663/2932/10464/3301/10959/51637/1789/7023/825/23411/25/1399/9647/25793/6547/655/9770/51654/56271/5611/9683/3551/51366/5518/857/3315/51422/3984/2022/23081/7016/6456/1855/23560/22943/80279/1845/5573/6830/83891/867/10114/23603…	283
GO:1902117	positive regulation of organelle assembly	50/8285	75/14199	0.0878141	0.786049	0.762701	57787/5601/387/6624/10615/2932/51100/9738/4848/57472/8723/55704/22930/6382/25782/9525/989/6491/23019/22873/3936/6386/246175/10733/5899/10146/4478/401548/90678/5305/55835/255967/50807/158297/163786/2909/221908/51375/10807/85459/79837/153241/202018/10015/9001/9662/8408/11152/1778/3064	50
GO:0038127	ERBB signaling pathway	71/8285	109/14199	0.0883468	0.789617	0.766162	84058/5286/5329/9961/9564/5774/26469/7251/7879/8527/634/5663/8895/27131/55614/25/5594/5641/9252/9770/9148/1845/2549/867/55914/1839/868/57142/55704/6654/54206/5290/5335/3092/58533/9026/153090/8412/1950/8826/5170/64762/2886/93343/207/9125/1956/84985/53358/5795/2241/6868/5801/3084/673/57732/92799/819/8065/3516/84632/79628/5747/9185/9001/5771/79643/5781/55532/89853/27246	71
GO:0006509	membrane protein ectodomain proteolysis	28/8285	40/14199	0.0891717	0.795046	0.77143	56928/5588/6093/5774/4898/5663/4627/152503/2822/51107/51429/8728/3586/102/84888/5045/5664/101/6868/7079/23385/51752/1605/56963/25825/23621/9860/55851	28
GO:0097485	neuron projection guidance	138/8285	219/14199	0.0892247	0.795046	0.77143	23077/2115/2534/11313/3730/7869/3670/1272/9369/7204/2042/3909/3918/9423/5588/4756/2046/1400/2736/10371/10512/5362/23032/1906/4983/285220/54437/1947/5459/4897/57556/1808/8829/9252/655/284217/10857/7976/6324/1749/3199/2737/9355/1855/2625/6387/219699/5818/7422/9037/90249/7474/6152/5361/6654/2043/1889/9048/8828/8609/89884/1948/64919/389549/1123/23022/55558/2045/10505/10154/5879/347733/80031/658/49447…	138
GO:0051345	positive regulation of hydrolase activity	293/8285	477/14199	0.0899074	0.797282	0.7736	843/8837/1856/10344/6792/2534/51099/23637/1663/637/10928/116984/25771/26999/4659/2769/841/55633/55854/23216/25791/2263/4649/7813/387/5590/6093/9448/23161/5134/10979/8301/489/7294/5909/2260/2192/29843/4208/2932/5978/23348/51291/7023/3655/11069/22861/55357/3326/23411/3717/84144/1399/23786/83874/9647/27352/5905/6655/5641/8874/6367/1512/8767/51231/9141/208/945/22900/23094/11033/857/1124/10392/5118/54…	293
GO:0014066	regulation of phosphatidylinositol 3-kinase signaling	58/8285	88/14199	0.0900537	0.797282	0.7736	51384/1634/3479/3082/4734/56005/2260/634/7042/23411/3717/4150/8395/219699/867/7337/2335/847/7291/10617/10385/5342/5156/79899/153090/55165/2247/1950/3480/4916/8394/56034/1956/4915/56623/25827/284/118788/3815/5783/4824/197358/4920/5747/80310/3643/10125/2066/3059/2149/205428/5343/4919/23396/10507/5649/5154/4914	58
GO:0048638	regulation of developmental growth	179/8285	287/14199	0.0904346	0.797282	0.7736	51265/5048/3720/6792/9043/7869/3479/22902/55841/23327/23105/2296/8531/9423/57609/2263/6857/7049/9175/10371/10512/32/4133/1906/26281/7161/22999/4208/3776/54437/2932/9706/10269/8455/9962/393/4897/57556/825/7430/1808/7093/25/8829/5641/6789/23394/2254/51760/6788/5802/59284/7472/2692/3984/7046/6387/657/2253/80351/6198/10743/6532/1982/2735/8437/1432/7422/9037/2690/23286/8614/7474/150465/57142/27429/233…	179
GO:0043171	peptide catabolic process	19/8285	26/14199	0.0904603	0.797282	0.7736	1800/29953/2678/1512/10404/7511/4048/4012/1889/3416/79094/2686/2028/9520/494143/1636/51752/290/728226	19
GO:0051491	positive regulation of filopodium assembly	19/8285	26/14199	0.0904603	0.797282	0.7736	5898/10178/6624/8829/2332/8976/7046/9148/9750/1809/163404/7043/54874/54828/84299/139818/2823/22871/375790	19
GO:0060765	regulation of androgen receptor signaling pathway	19/8285	26/14199	0.0904603	0.797282	0.7736	23028/9604/9063/23411/2033/23081/1655/27086/11315/3065/5585/6597/6049/9667/9611/3275/5245/51341/9612	19
GO:2000050	regulation of non-canonical Wnt signaling pathway	19/8285	26/14199	0.0904603	0.797282	0.7736	57560/25/57664/6424/22943/81029/27031/7474/22881/85407/1453/84870/2719/7074/51339/4300/57674/84133/1454	19
GO:0090101	negative regulation of transmembrane receptor protein serine/threonine kinase signaling pathway	74/8285	114/14199	0.0906515	0.797282	0.7736	11171/3309/4052/28996/7049/10272/4036/2734/25805/23411/25/857/22943/64081/64750/7323/83891/26036/7474/90/9480/7043/4035/56937/57045/58533/5468/23111/10468/10253/7080/6498/6653/51496/4091/2201/5170/10140/7157/63976/1745/3547/9350/6868/135228/8321/6497/4681/100532736/221496/10252/57057/168667/5654/161742/2200/753/203100/3175/124857/163126/51341/9241/283149/5465/9863/399473/390598/51592/79674/9719/2…	74
GO:0017038	protein import	124/8285	196/14199	0.0906958	0.797282	0.7736	3920/23633/8504/999/7175/10758/23534/3843/1994/55746/5743/5663/3320/2646/51194/55696/57506/10762/23511/3326/3717/56993/25813/4792/6789/55612/2254/3839/10204/83752/6788/51366/10469/9141/92609/30000/2737/51684/3837/4927/80273/3312/4928/57122/1432/51715/1871/9631/3836/1894/868/51555/7341/29103/51569/23435/1408/9409/1434/5190/9972/79902/5469/9349/8021/5189/84268/5901/10526/29969/55198/26953/53371/144…	124
GO:0003279	cardiac septum development	66/8285	101/14199	0.0908428	0.797383	0.773698	163/3670/11174/639/2263/7049/10512/4036/25831/7042/8829/10454/9321/655/6299/8701/3209/7046/2022/2625/657/2253/51684/7468/653/5754/9421/27031/7474/3280/90/9784/8828/11064/6909/6659/53834/6926/23493/4193/4091/7157/4089/9353/287/60485/8321/9249/64783/57057/23462/10818/84516/3516/6091/23414/55636/161882/9241/6586/6092/5138/55742/7541/4194/659	66
GO:0010332	response to gamma radiation	33/8285	48/14199	0.0924951	0.803097	0.779242	23028/3309/5888/1535/5423/57103/7520/10269/51776/2625/1410/867/4193/4609/675/7157/142/2177/11011/472/7486/598/596/3981/545/11200/3014/2547/7516/2074/2876/5591/404672	33
GO:1903844	regulation of cellular response to transforming growth factor beta stimulus	77/8285	119/14199	0.0927885	0.803097	0.779242	8837/1387/11171/3309/4052/28996/7049/8516/8425/2734/25805/3326/23411/2033/54976/55612/8312/857/2022/64081/64750/83891/112744/26036/4015/9480/7043/56937/4435/58533/9113/5468/9315/10253/7080/6498/6386/7057/4091/2201/5170/93649/7157/4089/63976/1745/1030/6935/26524/6868/135228/54778/6497/10252/5654/161742/2200/4088/753/255743/203100/9839/3175/124857/4087/163126/51341/80139/283149/5465/399473/51592/79…	77
GO:0006998	nuclear envelope organization	38/8285	56/14199	0.0938512	0.803097	0.779242	5048/6683/25978/10269/51510/25777/7443/128866/2010/7329/57097/4001/9631/51652/10783/23435/27243/27183/23175/27348/1861/26092/5578/221496/23353/221035/5579/81565/5347/23306/79188/165324/23399/79643/23141/1104/137886/57132	38
GO:1902017	regulation of cilium assembly	43/8285	64/14199	0.0939278	0.803097	0.779242	57787/6792/8100/4134/10198/23224/2665/9474/7419/2932/8814/9738/7016/90410/4117/55704/57489/989/22873/4957/51626/84260/115704/170690/51256/107080638/51473/55835/158297/2909/221908/10807/153241/202018/9001/9662/79598/8558/347240/9742/3064/115948/345643	43
GO:0051650	establishment of vesicle localization	102/8285	160/14199	0.093959	0.803097	0.779242	5048/83930/55773/8452/5874/84062/9892/5590/10947/23291/8301/23332/7251/7879/4133/56681/5663/10959/29058/8773/9342/9321/9371/55512/8120/8976/10652/1759/7016/8729/64149/84100/10342/3676/6382/66008/59349/55686/9525/55717/10987/8195/4430/55930/10749/547/27243/11127/27183/23208/8546/8027/1861/63971/6386/54874/55435/55212/8499/1453/4542/357/9919/84364/51128/4643/10239/1780/8867/11267/23400/23122/81565/…	102
GO:0031061	negative regulation of histone methylation	17/8285	23/14199	0.0941051	0.803097	0.779242	23028/3720/10157/672/9682/1789/23411/23081/6830/9555/55818/1786/22823/54880/55693/340602/5079	17
GO:0042755	eating behavior	17/8285	23/14199	0.0941051	0.803097	0.779242	1374/4988/4985/79809/135/9518/56923/51761/123041/7345/51738/1636/6774/5028/80010/5021/6900	17
GO:0051383	kinetochore organization	17/8285	23/14199	0.0941051	0.803097	0.779242	10403/80152/26054/10051/1063/64105/9787/10592/1062/83540/23126/1060/64946/81620/79003/9735/387103	17
GO:0097150	neuronal stem cell population maintenance	17/8285	23/14199	0.0941051	0.803097	0.779242	259266/5108/5978/51593/3280/2309/10893/6760/2177/79648/2308/2176/10642/84376/1000/84750/6657	17
GO:0007595	lactation	26/8285	37/14199	0.0942685	0.803097	0.779242	139596/7494/3091/7392/857/2692/9148/595/7421/7422/2030/7372/1385/540/5469/1036/5066/2697/7498/137964/538/6777/3177/2066/5021/9612	26
GO:0043687	post-translational protein modification	26/8285	37/14199	0.0942685	0.803097	0.779242	9474/60509/2346/9978/2822/150465/23463/64175/10987/3703/23287/114799/79672/285362/84236/9140/63894/26100/201595/64122/10491/157570/84871/10533/51451/123624	26
GO:1904358	positive regulation of telomere maintenance via telomere lengthening	26/8285	37/14199	0.0942685	0.803097	0.779242	11284/5588/7520/4216/8550/5594/80351/10575/4751/6950/3181/25913/1736/3178/10574/79618/472/22948/140609/26272/10694/7203/10576/1499/545/9212	26
GO:0019693	ribose phosphate metabolic process	219/8285	354/14199	0.0957205	0.803097	0.779242	204/10165/54677/10157/60481/3479/159/56474/2983/55711/5214/5315/387/5165/9759/80347/2182/6095/5151/2023/38/9605/1739/32/22978/51548/57103/108/5236/8671/5663/260425/1738/139596/11332/51733/6576/9567/2033/5836/3091/5634/5230/23417/4833/23205/2639/4967/3614/51422/2645/203/2584/230/51166/506/2597/7167/51715/10846/3157/8382/3156/8622/5144/7372/523/1716/8604/271/515/84618/6785/9414/1743/113/8034/23597/…	219
GO:0000963	mitochondrial RNA processing	15/8285	20/14199	0.0973163	0.803097	0.779242	60528/54802/51095/9692/51654/79072/57570/25821/87178/79675/6832/55006/54931/80324/60493	15
GO:0006817	phosphate ion transport	15/8285	20/14199	0.0973163	0.803097	0.779242	51447/5250/6424/8074/1408/468/11095/219855/9213/6574/56172/54020/6575/253512/1468	15
GO:0008334	histone mRNA metabolic process	15/8285	20/14199	0.0973163	0.803097	0.779242	5976/54464/22916/51692/6741/472/134353/7884/167153/53981/5394/167227/27257/84967/255374	15
GO:0009168	purine ribonucleoside monophosphate biosynthetic process	15/8285	20/14199	0.0973163	0.803097	0.779242	159/5634/3614/271/10606/272/471/132/8833/318/3251/3615/122622/100/158	15
GO:0030539	male genitalia development	15/8285	20/14199	0.0973163	0.803097	0.779242	51665/3209/2253/653/1718/3239/5156/6926/80000/6715/1499/4920/7490/10388/55366	15
GO:0051968	positive regulation of synaptic transmission, glutamatergic	15/8285	20/14199	0.0973163	0.803097	0.779242	84062/5743/59284/22930/57616/135/2752/6812/59283/4920/22871/5021/5649/54413/4914	15
GO:0032092	positive regulation of protein binding	51/8285	77/14199	0.0973586	0.803097	0.779242	26073/28996/119/4140/23032/5663/2932/22924/118/25805/3326/25/8829/2033/6789/22919/8767/6788/5516/857/9693/5515/7474/57669/5334/3416/4035/9026/6737/5901/79139/351/6135/4931/5899/6872/6934/7074/121665/2035/267/1636/7015/51339/51068/5986/627/302/5071/120892/10418	51
GO:0060038	cardiac muscle cell proliferation	31/8285	45/14199	0.0981155	0.803097	0.779242	3720/2296/2263/7049/26281/7161/4208/3776/7042/2254/7472/7046/657/5573/2735/1432/6909/23493/2247/9686/26011/60485/861/57057/3516/23414/983/2066/205428/9241/196528	31
GO:0018342	protein prenylation	8285-09-01	11/14199	0.0983435	0.803097	0.779242	23746/5876/5229/2339/9986/1121/375743/1122/2342	9
GO:0032230	positive regulation of synaptic transmission, GABAergic	8285-09-01	11/14199	0.0983435	0.803097	0.779242	148/135/84885/51304/22871/3799/5581/9001/5021	9
GO:0043248	proteasome assembly	8285-09-01	11/14199	0.0983435	0.803097	0.779242	5716/5717/56984/11047/51371/23392/51633/389362/8624	9
GO:0043922	negative regulation by host of viral transcription	8285-09-01	11/14199	0.0983435	0.803097	0.779242	64710/5978/7023/3065/23435/51193/51763/8091/3725	9
GO:0051081	nuclear membrane disassembly	8285-09-01	11/14199	0.0983435	0.803097	0.779242	5048/7443/10783/23175/5578/5579/81565/5347/23399	9
GO:0070203	regulation of establishment of protein localization to telomere	8285-09-01	11/14199	0.0983435	0.803097	0.779242	10575/6950/1736/10574/7013/22948/10694/7203/10576	9
GO:0072710	response to hydroxyurea	8285-09-01	11/14199	0.0983435	0.803097	0.779242	1663/5888/546/2332/8914/11143/23514/641/84301	9
GO:0090657	telomeric loop disassembly	8285-09-01	11/14199	0.0983435	0.803097	0.779242	7517/25913/7014/7013/9401/7486/79008/84464/641	9
GO:0097354	prenylation	8285-09-01	11/14199	0.0983435	0.803097	0.779242	23746/5876/5229/2339/9986/1121/375743/1122/2342	9
GO:1904869	regulation of protein localization to Cajal body	8285-09-01	11/14199	0.0983435	0.803097	0.779242	10575/6950/1736/10574/22948/10694/7203/10576/51574	9
GO:1904871	positive regulation of protein localization to Cajal body	8285-09-01	11/14199	0.0983435	0.803097	0.779242	10575/6950/1736/10574/22948/10694/7203/10576/51574	9
GO:0016197	endosomal transport	137/8285	218/14199	0.0984769	0.803097	0.779242	55610/9912/8938/9043/54497/51534/6642/7260/55773/23274/9765/9341/55745/7813/56850/55737/8218/8301/7879/23085/25978/10890/2060/51510/27131/83874/85377/10043/10490/10139/128866/8411/57020/30844/25963/51201/55353/8677/84079/10652/57589/8729/9527/23603/11021/8724/23527/8723/9784/51652/7840/8934/51552/57706/9525/400/80148/9559/9367/23163/54520/58513/25938/58533/51429/27243/84440/9779/57533/27183/8546/…	137
GO:0048259	regulation of receptor-mediated endocytosis	59/8285	90/14199	0.0987516	0.803097	0.779242	84058/84062/5291/9892/8301/88455/8527/4983/8898/7018/9463/79890/2332/8976/6424/22943/9094/867/60682/7422/9829/84251/3208/1948/3092/4289/9026/5538/9779/1742/967/54806/5879/6386/84896/3685/55589/1950/6457/409/375/26045/636/284/27342/8867/1173/6850/3190/382/146395/3643/302/9863/29978/5336/23607/124930/6311	59
GO:0006163	purine nucleotide metabolic process	214/8285	346/14199	0.0995506	0.803097	0.779242	204/10165/54677/10157/60481/3479/159/2983/55711/5214/5315/387/5165/9759/80347/2182/6095/5151/2023/38/9605/1739/32/22978/51548/57103/108/5236/8671/5663/260425/1738/11332/6576/9567/2033/3091/4522/25939/5634/5230/23417/4833/23205/2639/4967/3614/51422/2645/203/2584/230/51166/506/2597/7167/51715/10846/10591/3157/8382/3156/8622/5144/523/1716/8604/271/515/84618/6785/9414/1743/113/3208/8034/23597/2181/51…	214
GO:0009303	rRNA transcription	24/8285	34/14199	0.0996356	0.803097	0.779242	1663/6949/2975/55506/10927/10360/9555/4691/2976/9014/9330/2971/9329/84172/64768/6597/25926/11137/7157/112495/84365/284119/2972/2475	24
GO:0050775	positive regulation of dendrite morphogenesis	24/8285	34/14199	0.0996356	0.803097	0.779242	51265/5048/6792/27067/9820/816/5063/79791/84079/23316/2043/23363/4076/56965/3706/10097/5789/7804/100528062/26259/29882/5649/80823/1523	24
GO:0051973	positive regulation of telomerase activity	24/8285	34/14199	0.0996356	0.803097	0.779242	11284/5588/7520/3320/79977/4216/8550/3326/5594/10728/10575/4751/6950/25913/1736/9314/4609/4931/79618/140609/10576/1499/25849/9212	24
GO:0006414	translational elongation	36/8285	53/14199	0.099656	0.803097	0.779242	16/9567/84164/8846/1917/9325/22849/10973/10767/51611/10102/89978/65080/6176/79631/9775/6726/92715/285381/10600/1915/9147/1938/90850/85476/2915/120526/54676/6181/7284/54952/79048/51714/26046/1734/143244	36
GO:0016447	somatic recombination of immunoglobulin gene segments	36/8285	53/14199	0.099656	0.803097	0.779242	2067/7158/5423/6929/7037/4292/9984/55183/4436/4683/51010/6830/7468/51111/9025/4437/2956/7292/54537/78996/80762/84787/23075/3586/121260/3329/7518/22976/165918/200558/9156/3981/79915/56941/118460/5591	36
GO:0022029	telencephalon cell migration	36/8285	53/14199	0.099656	0.803097	0.779242	5048/23224/387/5663/3912/114327/4967/2737/26468/6387/57178/57142/2258/153090/9353/1956/3084/7804/5194/27185/285025/23353/81565/1499/200894/6091/653464/84750/1600/2290/8851/6900/5454/120892/5649/5455	36
GO:0070918	primary sncRNA processing	36/8285	53/14199	0.099656	0.803097	0.779242	23369/79670/10269/51593/26523/23405/1655/29102/7257/29066/3181/27161/192669/54487/4613/9698/192670/23318/84872/9611/93649/7157/1956/103/79753/7015/56339/4088/6774/5604/4087/389421/9612/51490/131405/1654	36
GO:0002097	tRNA wobble base modification	13/8285	17/14199	0.0996921	0.803097	0.779242	8518/55687/8846/26610/84705/55140/25821/91801/285381/81605/63899/134637/112970	13
GO:0006740	NADPH regeneration	13/8285	17/14199	0.0996921	0.803097	0.779242	51071/57103/23530/25796/7157/5226/10840/22934/7086/5223/6888/23729/6120	13
GO:0061158	3'-UTR-mediated mRNA destabilization	13/8285	17/14199	0.0996921	0.803097	0.779242	5976/22849/23435/7538/149041/3184/678/4343/340152/677/84069/131405/373863	13
GO:0061952	midbody abscission	13/8285	17/14199	0.0996921	0.803097	0.779242	25978/51510/128866/10112/51652/9525/27243/27183/55165/129531/10015/79643/57132	13
GO:0070200	establishment of protein localization to telomere	13/8285	17/14199	0.0996921	0.803097	0.779242	10575/6950/25913/1736/10574/675/7013/22948/152485/10694/7203/7015/10576	13
GO:0070935	3'-UTR-mediated mRNA stabilization	13/8285	17/14199	0.0996921	0.803097	0.779242	8531/1994/3183/23185/1432/11044/23435/79066/7538/9261/90806/10949/8241	13
GO:0072673	lamellipodium morphogenesis	13/8285	17/14199	0.0996921	0.803097	0.779242	51177/960/6642/8874/23189/23603/8936/6239/10006/5168/10163/10630/6643	13
GO:0090308	regulation of DNA methylation-dependent heterochromatin assembly	13/8285	17/14199	0.0996921	0.803097	0.779242	23028/1786/22880/51535/83852/80312/9869/23272/80063/55729/55196/54737/84456	13
GO:1903830	magnesium ion transmembrane transport	13/8285	17/14199	0.0996921	0.803097	0.779242	57185/84061/79815/7991/57380/84102/81614/54805/152519/93380/348938/54503/23390	13
GO:0032922	circadian regulation of gene expression	41/8285	61/14199	0.0997358	0.803097	0.779242	23077/1407/56938/8863/6095/5927/10075/23411/5971/10135/10743/83594/3398/3065/4297/1408/468/10514/8553/9575/10499/463/1453/8473/25819/3192/4862/3400/22992/83759/5187/9500/8204/9112/5501/5465/3066/7150/55366/5500/1454	41
GO:2000058	regulation of ubiquitin-dependent protein catabolic process	103/8285	162/14199	0.100017	0.803097	0.779242	2729/54467/51667/9604/23376/8554/25897/5601/28996/1459/28951/55743/23609/51548/3093/5663/2932/7514/6790/25831/51322/3326/9978/27351/1457/9097/5716/9683/8312/6449/51343/857/1855/51684/1452/7337/7341/11315/127544/440730/5887/6125/9349/84074/9113/29979/23287/4193/2295/255488/6386/55212/1950/144165/1453/207/6135/64326/154214/2768/11011/6872/8473/8667/9781/57630/153769/10444/79699/7805/27185/25898/285…	103
GO:0034101	erythrocyte homeostasis	78/8285	121/14199	0.10005	0.803097	0.779242	55904/23376/5926/28996/6688/7049/23210/79876/10296/3717/3162/23774/3091/22985/6223/1777/3718/2116/1021/3202/2625/80279/3216/1432/60682/7422/3313/4090/6772/3398/2034/5052/2309/92/3071/3623/116151/5469/7067/7538/2113/91/23456/3658/11143/6194/6229/29766/5925/8444/54977/55646/54892/1054/3815/5316/103/6886/25893/28982/3148/94081/6208/6774/7564/6670/6777/5771/51341/2624/161882/3059/677/84529/9636/8861/…	78
GO:0006004	fucose metabolic process	8285-11-01	14/14199	0.100507	0.803097	0.779242	2519/2530/23509/10690/84750/2524/2517/23275/145173/2526/8790	11
GO:0006098	pentose-phosphate shunt	8285-11-01	14/14199	0.100507	0.803097	0.779242	51071/57103/25796/7157/5226/22934/7086/5223/6888/23729/6120	11
GO:0010457	centriole-centriole cohesion	8285-11-01	14/14199	0.100507	0.803097	0.779242	54875/51199/4751/11190/151648/11127/4957/80817/1499/9662/25914	11
GO:0035563	positive regulation of chromatin binding	8285-11-01	14/14199	0.100507	0.803097	0.779242	23028/1663/51053/83666/79618/114991/90780/81620/1488/55693/64641	11
GO:0045842	positive regulation of mitotic metaphase/anaphase transition	8285-11-01	14/14199	0.100507	0.803097	0.779242	996/8452/29945/51433/9587/9787/8881/5925/286053/81620/51434	11
GO:0050884	neuromuscular process controlling posture	8285-11-01	14/14199	0.100507	0.803097	0.779242	2643/51761/6323/5457/2636/2395/112476/4204/2548/104/441027	11
GO:0061709	reticulophagy	8285-11-01	14/14199	0.100507	0.803097	0.779242	23376/9821/55102/79876/9706/51569/51506/54463/51368/8408/65992	11
GO:0071732	cellular response to nitric oxide	8285-11-01	14/14199	0.100507	0.803097	0.779242	8837/1800/2983/4548/3184/890/2308/498/9131/1398/358	11
GO:1900153	positive regulation of nuclear-transcribed mRNA catabolic process, deadenylation-dependent decay	8285-11-01	14/14199	0.100507	0.803097	0.779242	26986/57690/23112/22849/27161/23019/7538/10140/678/677/29883	11
GO:1901970	positive regulation of mitotic sister chromatid separation	8285-11-01	14/14199	0.100507	0.803097	0.779242	996/8452/29945/51433/9587/9787/8881/5925/286053/81620/51434	11
GO:1902969	mitotic DNA replication	8285-11-01	14/14199	0.100507	0.803097	0.779242	5888/4175/10269/8318/9837/5422/4173/3978/4172/675/64785	11
GO:1904814	regulation of protein localization to chromosome, telomeric region	8285-11-01	14/14199	0.100507	0.803097	0.779242	9555/10575/6950/54552/1736/10574/7013/22948/10694/7203/10576	11
GO:0106027	neuron projection organization	54/8285	82/14199	0.101175	0.80734	0.78336	9912/5048/2534/27067/84062/816/25791/55737/5063/5663/2932/8898/9463/5641/8976/51104/1855/23316/7337/85461/2043/5357/547/1742/4076/3706/10097/22891/10152/8499/3480/351/375/9456/2047/7804/100528062/23181/10611/22871/1501/91752/26115/3643/5621/1072/225/8851/10196/120892/5649/26037/80823/2904	54
GO:0021953	central nervous system neuron differentiation	95/8285	149/14199	0.102734	0.818674	0.794357	57147/23077/5048/3670/58524/2263/6095/2736/10371/4133/7289/4983/5663/3320/3326/8829/51199/8925/6324/136319/4967/2737/26468/51684/57178/9693/113246/3280/1746/2043/8828/23314/89884/79809/6659/4821/55906/64919/3236/57688/3110/55558/9201/23287/26160/121643/161357/57410/151449/57282/1745/9353/4781/4915/5457/2895/6695/4929/54149/2047/9334/7832/2909/6886/27185/4825/91137/27089/57057/2636/538/3251/81565/…	95
GO:0032869	cellular response to insulin stimulus	112/8285	177/14199	0.103049	0.820072	0.795714	2729/8837/55971/5286/9564/5588/5315/5590/64710/490/6720/634/2932/10890/27131/114882/10580/23411/7494/6430/64397/208/2887/2692/2645/23189/6198/2549/23371/9847/2822/896/2690/8850/2888/6772/54206/3416/5290/57727/55829/5468/51763/5786/8471/23175/324/1019/55198/9882/2058/29988/4609/55667/6653/8412/2660/8615/5925/376267/3480/5170/207/142/6715/55023/8473/1979/143686/140710/5305/2308/2241/5140/55625/2606…	112
GO:0001655	urogenital system development	194/8285	313/14199	0.103477	0.821868	0.797456	56603/8837/2288/3207/9244/163/25937/23279/8100/84062/57545/50484/11174/79810/2296/10758/639/29927/2263/387/55746/23210/2736/38/1739/5076/5915/8516/7161/1286/384/4208/4036/51668/10269/285/7042/5125/8829/1399/162/11020/655/6299/23322/1512/268/3209/2737/7046/2625/2253/90410/7466/7704/23371/2735/57122/6492/5754/7422/9096/4090/27031/7337/7474/3280/93/90/9784/6772/6382/2043/51107/1063/5311/11064/3070/3…	194
GO:0030218	erythrocyte differentiation	73/8285	113/14199	0.103555	0.821868	0.797456	55904/23376/5926/28996/6688/7049/23210/79876/10296/3717/23774/3091/22985/6223/1777/3718/2116/1021/3202/2625/80279/1432/60682/7422/3313/4090/6772/3398/2034/2309/92/3071/3623/116151/5469/7067/7538/2113/91/23456/11143/6194/29766/5925/8444/54977/55646/54892/1054/3815/5316/103/6886/25893/28982/3148/94081/6208/6774/7564/6670/6777/5771/51341/2624/161882/3059/677/84529/9636/8861/84456/5591	73
GO:1903432	regulation of TORC1 signaling	29/8285	42/14199	0.104124	0.825277	0.800764	58528/23274/1497/55593/27244/81929/51322/84861/9681/9894/55846/10641/51520/8444/1609/203228/143686/472/64798/23387/154743/54468/90809/56834/144577/220441/283554/23334/729438	29
GO:0043547	positive regulation of GTPase activity	144/8285	230/14199	0.104545	0.825416	0.800899	1856/10344/6792/23637/10928/116984/25771/55633/55854/23216/25791/4649/7813/9448/23161/10979/8301/5909/2932/23348/51291/3655/11069/55357/84144/1399/83874/27352/5905/6655/8874/6367/208/23094/11033/1124/2146/57589/81704/2889/22841/51195/23158/9693/23603/5924/7474/1894/10297/22930/6654/55103/5906/85440/57568/57580/128637/1123/2302/57572/51429/4301/27237/9779/23108/57533/92154/54885/51520/9882/9771/96…	144
GO:0044089	positive regulation of cellular component biogenesis	270/8285	440/14199	0.10465	0.825416	0.800899	26073/56919/5898/55971/10344/57787/10178/54443/2067/637/23187/27067/7175/5601/57600/10787/22998/387/89795/6093/9448/7037/10979/23332/7251/55160/6624/1739/7879/10615/55604/3320/2932/5705/5829/25/51100/8829/9647/51199/23394/655/55612/3055/22919/79953/2332/27286/3038/55512/9780/9738/857/4233/23242/8976/3984/7046/7016/9148/5216/57482/55626/23316/55832/4848/9750/7422/57472/1809/51185/3373/8723/1981/10…	270
GO:0006303	double-strand break repair via nonhomologous end joining	44/8285	66/14199	0.104982	0.825416	0.800899	3980/25900/2067/4361/11284/1161/10721/7158/5423/7515/4292/7520/55183/23347/5422/7468/51111/27339/9025/54537/78996/7913/79000/25913/84787/83666/472/8091/7518/64421/3148/27343/200558/22992/3981/2072/51341/56941/55693/2547/7405/9937/2074/5591	44
GO:0010165	response to X-ray	22/8285	31/14199	0.105267	0.825416	0.800899	2067/1161/5888/7158/64710/7520/4436/2625/595/675/7157/472/8091/7518/25836/121457/3981/79184/2547/7516/641/2074	22
GO:0034508	centromere complex assembly	22/8285	31/14199	0.105267	0.825416	0.800899	2491/80152/26054/1063/3070/64105/55355/9787/3021/4678/79172/1062/5925/23421/23126/1060/64946/201161/79003/9735/401541/387103	22
GO:0036297	interstrand cross-link repair	22/8285	31/14199	0.105267	0.825416	0.800899	2067/5888/64710/55247/10635/254394/9025/78995/7517/91442/2177/64421/165918/64789/55159/545/2072/375748/5892/57697/84464/9937	22
GO:0062237	protein localization to postsynapse	22/8285	31/14199	0.105267	0.825416	0.800899	9912/5590/56850/55737/1739/2239/51201/59284/5906/23096/1742/102/23426/2905/160622/5913/4218/10815/4884/22883/1605/10082	22
GO:1903539	protein localization to postsynaptic membrane	22/8285	31/14199	0.105267	0.825416	0.800899	9912/5590/56850/55737/1739/2239/51201/59284/5906/23096/1742/102/23426/2905/160622/5913/4218/10815/4884/22883/1605/10082	22
GO:0048706	embryonic skeletal system development	76/8285	118/14199	0.105643	0.825416	0.800899	3207/54799/2263/1739/7289/79977/5125/4522/655/2254/3199/3200/3202/3203/2737/7046/2253/3216/579/7474/3373/1746/23314/7043/3218/3215/3213/25902/56243/157506/92/3204/7291/3227/860/55112/3232/3235/3236/5156/7020/23213/1280/9775/27173/1745/6935/1909/4325/57728/28982/25836/4088/1499/6474/202018/3233/3219/6670/3212/4087/10265/57453/8092/3225/29072/2131/3214/9241/5087/9742/5079/55959/3201/3221/3217	76
GO:0071375	cellular response to peptide hormone stimulus	153/8285	245/14199	0.105656	0.825416	0.800899	2729/8837/55971/5286/1373/9564/1535/5588/5315/5590/6093/64710/815/490/6720/1906/634/2932/10890/27131/5829/114882/990/10580/23411/3717/7494/5905/6430/328/64397/208/7297/3718/857/2887/1395/2692/2645/23189/6198/4790/2549/23371/9847/2822/896/2690/8850/2888/6772/54206/3416/5290/57727/4149/9518/55829/5468/51763/5786/8471/9475/23175/324/1019/55198/9882/83990/2058/29988/4609/55667/84709/6653/8412/1545/26…	153
GO:0051646	mitochondrion localization	34/8285	50/14199	0.105884	0.825416	0.800899	6683/4205/2011/10059/3091/51566/55156/2648/8936/66008/4139/9927/55154/5819/23277/23287/84709/10128/89941/9638/7345/7314/4534/55669/9001/168620/22906/84871/57835/120892/487/4976/440503/3281	34
GO:0010972	negative regulation of G2/M transition of mitotic cell cycle	39/8285	58/14199	0.105967	0.825416	0.800899	672/4361/2273/1112/55743/8555/4998/51720/63967/990/4683/51343/80279/900/60672/25949/27183/51347/90381/51514/472/1111/8091/9577/29980/84142/11073/5885/5347/57099/55031/983/9212/79184/116224/135458/641/91603/54984	39
GO:0042255	ribosome assembly	39/8285	58/14199	0.105967	0.825416	0.800899	54505/7520/29093/6193/6128/6175/6223/708/4839/23195/6152/6209/130916/51116/6125/51081/51119/51388/79631/6123/6135/83939/51001/6208/3921/6169/6232/4869/64963/51335/51065/27341/84154/6147/1654/5822/55052/5591/23246	39
GO:0072521	purine-containing compound metabolic process	225/8285	365/14199	0.107217	0.834053	0.809279	22875/204/23028/10165/54677/10157/60481/55/3479/159/2983/55711/5214/5315/387/5165/9759/80347/2182/6095/5151/2023/38/9605/1739/32/22978/51548/57103/108/5236/8671/5663/260425/1738/11332/56952/4507/6576/9567/2033/3091/4522/25939/5634/5230/23417/4833/23205/2639/4967/4521/3614/51422/2645/203/2584/230/51166/506/2597/7167/51715/10846/10591/3157/8382/3156/8622/5144/523/1716/8604/23463/271/515/84618/6785/…	225
GO:0051098	regulation of binding	210/8285	340/14199	0.10764	0.836239	0.8114	26073/23028/5329/1663/3670/3479/84062/51773/2296/23063/28996/53339/6093/9759/64710/7049/2011/1400/489/6717/119/4140/60/5909/23032/4133/5663/2932/10269/22924/118/6790/79822/7023/8487/9044/25805/3326/3717/25/8829/3162/2033/4792/6789/23394/1522/22919/2332/8874/8767/6788/5516/857/4233/9355/7046/8721/1855/2625/5599/23560/22943/25979/9693/56341/9750/9532/51053/4015/9421/5515/1452/7474/3280/868/1981/576…	210
GO:0072522	purine-containing compound biosynthetic process	113/8285	179/14199	0.109069	0.846222	0.821086	204/10165/60481/159/2983/5165/80347/2182/2023/38/9605/32/108/1738/11332/56952/4507/6576/4522/5634/23417/4833/23205/2639/3614/51422/203/506/8382/523/1716/8604/271/515/6785/113/3208/8034/262/2181/514/51000/27109/80025/10606/5538/47/5160/272/4907/517/4609/109/471/60490/9061/5636/29922/55811/142/5631/50808/51144/134145/1737/498/5163/2977/53354/26289/518/522/221264/1836/132/1633/23181/5635/115/4880/88…	113
GO:0021954	central nervous system neuron development	47/8285	71/14199	0.109671	0.849768	0.824527	23077/5048/2263/2736/10371/4133/3320/3326/8829/51199/6324/4967/26468/57178/9693/113246/2043/8828/55558/9201/23287/57282/9353/4781/4915/4929/2047/9334/7832/2909/27185/27089/538/3251/81565/5881/7314/166614/143941/79625/2290/2624/6900/84871/104/23334/91584	47
GO:0043628	ncRNA 3'-end processing	27/8285	39/14199	0.110553	0.852176	0.826864	60528/51095/23016/26512/90459/26024/51010/57508/79033/11340/23404/1736/114034/6741/57117/55520/25896/51728/55656/5394/6227/54931/51574/80789/345630/112479/118460	27
GO:0021543	pallium development	99/8285	156/14199	0.110601	0.852176	0.826864	23028/5048/10460/55236/23035/23224/259266/387/1459/7515/284403/5663/2932/22803/3912/114327/1399/3091/1021/4967/2146/2737/9355/26468/2253/57178/2145/4192/3736/221692/57142/1746/3065/6513/9928/8195/93986/2258/55558/5914/5901/22903/54407/4677/6434/153090/81853/10579/471/306/3480/63950/1745/66000/9353/8893/2044/6715/1956/79648/6867/4915/9638/7804/10642/7832/5194/27185/285025/167153/27089/23353/7248/8…	99
GO:0072384	organelle transport along microtubule	55/8285	84/14199	0.110927	0.852176	0.826864	5048/6683/84062/23224/5590/10947/23291/4133/3797/3091/9371/51566/8120/57584/8936/66008/55686/10749/547/11127/8546/23287/63971/84709/10128/89941/5195/9638/636/7345/10239/1780/26958/25893/23353/81565/7314/3799/10125/9001/5870/1176/22906/26985/3916/84871/55330/63915/199953/388552/282991/1778/3064/4976/3281	55
GO:1903322	positive regulation of protein modification by small protein conjugation or removal	85/8285	133/14199	0.11097	0.852176	0.826864	23028/23077/1407/83932/672/330/8554/8452/54165/3309/5601/9759/55743/8555/10075/23551/9978/5716/54602/8312/9810/8767/51343/857/5414/80279/23142/7466/329/6500/7337/868/84930/25950/9111/10054/80762/29979/64844/10010/79139/84259/144165/55215/10055/8915/6502/51256/107080638/55208/26272/284/56254/22976/54778/7805/25898/59343/285671/254170/8945/54838/5347/648/11170/7336/7314/10892/150684/11065/7189/7334…	85
GO:0048732	gland development	229/8285	372/14199	0.111066	0.852176	0.826864	8837/2288/3207/3720/823/3670/3082/1373/9821/11231/8452/999/79810/2296/9423/2263/5307/7049/5774/5423/1459/55679/2736/10371/10512/38/5909/1906/634/5663/10269/6790/7042/139596/3717/25/8829/1399/51733/5594/7494/25807/3162/50/3091/6430/394/6729/655/284217/79152/6299/23322/208/7392/51599/5764/857/4233/7472/3200/3202/3209/23242/2692/2146/2737/7046/2625/657/2253/9148/80279/1374/595/4192/2735/7421/7422/20…	229
GO:0010847	regulation of chromatin assembly	20/8285	28/14199	0.111141	0.852176	0.826864	23028/7175/5290/1786/22880/51535/83852/80312/9869/23272/80063/25942/55729/23133/55196/353274/54737/5253/9646/84456	20
GO:0030204	chondroitin sulfate metabolic process	20/8285	28/14199	0.111141	0.852176	0.826864	1634/64132/54928/9806/7358/29940/3373/22856/55501/56548/55790/83539/133584/55454/79625/126792/51363/2131/50859/337876	20
GO:0060325	face morphogenesis	20/8285	28/14199	0.111141	0.852176	0.826864	2033/83716/1749/59338/22943/4621/22930/7043/5156/84159/6497/4487/25976/25836/8879/29123/5781/9241/444/5083	20
GO:0042177	negative regulation of protein catabolic process	74/8285	115/14199	0.111569	0.854344	0.828967	1595/23077/2534/11345/28996/6093/55737/5774/1459/27074/4983/5663/51322/3326/1457/9097/9683/55353/6449/57589/51684/80279/8724/3156/2043/11315/6125/9349/5582/84074/116986/64844/3586/153090/6386/5045/4089/6135/113451/1956/11011/6872/8473/29934/8667/51582/29761/56776/7079/3084/23400/2905/4085/819/4745/9529/4088/5245/4534/6201/10869/143941/54971/80011/6599/575/302/23450/2272/2316/258010/65992/4194/9860	74
GO:1901653	cellular response to peptide	184/8285	297/14199	0.11211	0.857375	0.831909	2729/8837/55971/2534/5286/1663/3479/1373/7431/9564/1535/5588/5315/5590/6093/64710/815/490/6720/1906/634/5663/2932/10890/51510/27131/5829/114882/990/10580/23411/3717/7494/5905/5641/6430/328/55512/64397/8767/208/7297/3718/857/2887/10392/1395/2692/2645/23189/6198/4790/2549/51274/23371/8914/9847/2822/896/2690/8850/3676/2888/6772/2043/54206/2309/3416/5290/4035/57727/9349/4149/599/58533/9518/55107/5582…	184
GO:0038202	TORC1 signaling	32/8285	47/14199	0.112576	0.859345	0.83382	58528/23274/1497/55593/27244/81929/51322/84861/9681/9894/55846/10641/51520/57521/8444/1609/203228/143686/472/64798/23387/256471/154743/54468/90809/56834/144577/220441/283554/23334/2475/729438	32
GO:0043489	RNA stabilization	37/8285	55/14199	0.11266	0.859345	0.83382	7812/54888/9967/10758/8531/4904/1994/26986/2521/3183/1153/23185/1432/11044/23435/51538/79066/7538/1736/10492/1660/3184/25819/3192/10642/9261/167153/51808/2668/8313/10605/90806/10949/8241/54855/56478/373863	37
GO:1903050	regulation of proteolysis involved in cellular protein catabolic process	134/8285	214/14199	0.113495	0.864593	0.838911	2729/54467/114881/51667/9604/23376/8554/25897/11345/5601/8975/28996/4287/1459/28951/55743/23609/51548/27074/3093/4983/5663/2932/7514/5705/6790/25831/51322/3326/9978/27351/1457/9097/5716/2332/9683/8312/9810/6449/51343/857/1855/51684/1075/9532/1452/7337/7341/2043/11315/127544/440730/5887/6125/9349/5582/84074/9113/10197/29979/23287/84900/4193/55270/64844/153090/2295/255488/6386/55212/1950/91445/1441…	134
GO:0007623	circadian rhythm	111/8285	176/14199	0.114471	0.8709	0.845031	23077/26224/1407/56938/8863/5601/9967/6095/6720/23291/5927/23239/2932/10075/23411/402055/2033/5971/1628/10135/2692/2146/23064/5599/10743/6532/4669/8914/83594/7337/3398/3065/6421/4297/1385/687/23435/55269/1408/8239/5582/135/468/7153/5468/10514/1644/5158/8553/9475/9575/55336/7080/3062/3184/4704/121278/10499/463/9611/7157/1453/8792/6715/64839/8473/4915/25819/9456/79723/3192/2776/51738/1859/5563/107/…	111
GO:0010639	negative regulation of organelle organization	206/8285	334/14199	0.116324	0.883174	0.856941	2729/2288/85477/9031/7756/672/2067/3479/3082/4331/54908/7175/4134/10198/2665/23063/57143/10565/89795/23293/6196/9319/7037/7515/23332/119/7879/4133/57103/55604/10403/54434/546/10075/9183/118/22974/79822/23256/3183/28978/84861/11078/9463/655/22919/128866/5716/4281/8874/9738/10391/4683/11075/23370/84079/136319/4233/23189/7016/80351/4591/5216/2648/10493/57482/56890/4117/26271/7272/5810/10111/54464/88…	206
GO:0090307	mitotic spindle assembly	45/8285	68/14199	0.116494	0.883174	0.856941	26073/7756/7175/387/8243/23332/10464/25978/51510/22974/24137/4605/9371/128866/55125/10735/6795/56647/9126/3837/51652/4751/10274/9525/27243/9493/3832/3192/126731/29127/84142/23122/79884/23172/5347/79643/9212/79598/11200/4733/165186/2316/23116/440145/57132	45
GO:0046174	polyol catabolic process	18/8285	25/14199	0.117212	0.883174	0.856941	9108/3632/8871/8898/54928/8821/7167/2820/51763/3612/56623/26007/3628/8867/256356/2710/3633/11165	18
GO:0048679	regulation of axon regeneration	18/8285	25/14199	0.117212	0.883174	0.856941	8428/5802/5764/2043/2281/9314/9856/3480/5792/29956/81565/5604/56963/83999/2316/9860/22876/1270	18
GO:0060148	positive regulation of post-transcriptional gene silencing	18/8285	25/14199	0.117212	0.883174	0.856941	23369/2332/1655/8087/57510/7538/4613/9698/1660/93649/7157/126374/8994/1956/7073/6774/5604/131405	18
GO:1900370	positive regulation of post-transcriptional gene silencing by RNA	18/8285	25/14199	0.117212	0.883174	0.856941	23369/2332/1655/8087/57510/7538/4613/9698/1660/93649/7157/126374/8994/1956/7073/6774/5604/131405	18
GO:0003203	endocardial cushion morphogenesis	25/8285	36/14199	0.117436	0.883174	0.856941	3670/7042/655/7046/2022/657/2253/653/90/6909/7291/6615/6926/23493/4193/4089/4487/57057/23462/55273/3516/6091/9241/6092/4194	25
GO:0017004	cytochrome complex assembly	25/8285	36/14199	0.117436	0.883174	0.856941	1352/54902/1355/1535/617/55744/79072/6341/51241/51204/84300/10063/285521/388753/84275/51287/493753/28958/90624/790955/728568/100303755/90639/389203/84334	25
GO:0060043	regulation of cardiac muscle cell proliferation	25/8285	36/14199	0.117436	0.883174	0.856941	3720/2263/7049/26281/7161/4208/3776/2254/7472/7046/657/2735/1432/6909/23493/2247/9686/60485/861/57057/3516/23414/983/2066/9241	25
GO:0035107	appendage morphogenesis	86/8285	135/14199	0.118491	0.88849	0.862099	56603/3207/1387/2263/5307/10512/5362/5915/7289/5663/79977/546/51776/7042/5125/51098/655/2254/6299/23322/54928/1749/64327/23288/3209/2737/657/2253/22943/4621/7704/7474/3065/1889/157506/6909/7291/8434/3227/6659/860/5469/3235/3236/3239/8854/6926/7020/2201/1280/494470/4089/51057/3899/80856/221322/2768/2719/340419/341640/4154/2697/10018/57728/6497/28982/4487/27152/25836/51222/1499/6474/4920/55636/3226…	86
GO:0035108	limb morphogenesis	86/8285	135/14199	0.118491	0.88849	0.862099	56603/3207/1387/2263/5307/10512/5362/5915/7289/5663/79977/546/51776/7042/5125/51098/655/2254/6299/23322/54928/1749/64327/23288/3209/2737/657/2253/22943/4621/7704/7474/3065/1889/157506/6909/7291/8434/3227/6659/860/5469/3235/3236/3239/8854/6926/7020/2201/1280/494470/4089/51057/3899/80856/221322/2768/2719/340419/341640/4154/2697/10018/57728/6497/28982/4487/27152/25836/51222/1499/6474/4920/55636/3226…	86
GO:1902750	negative regulation of cell cycle G2/M phase transition	40/8285	60/14199	0.118596	0.88849	0.862099	672/4361/2273/1112/55743/8555/4998/51720/63967/990/4683/51343/80279/900/9555/60672/25949/27183/51347/90381/51514/472/1111/8091/9577/29980/84142/11073/5885/5347/57099/55031/983/9212/79184/116224/135458/641/91603/54984	40
GO:0006195	purine nucleotide catabolic process	30/8285	44/14199	0.119777	0.891171	0.8647	5151/38/22978/11332/25939/23417/10846/10591/8622/5144/84618/30833/272/4907/55270/8654/7498/5152/3251/3094/27115/5142/5138/100/9583/131870/5150/390916/11165/79873	30
GO:0006984	ER-nucleus signaling pathway	30/8285	44/14199	0.119777	0.891171	0.8647	3309/6720/55160/2932/10959/10613/57003/55161/7466/79794/10162/22937/22926/468/55829/1965/8720/7157/54499/83939/11160/83734/10018/4690/267/488/5771/3638/5770/54870	30
GO:0043039	tRNA aminoacylation	30/8285	44/14199	0.119777	0.891171	0.8647	6301/55699/16/124454/2617/6897/5917/1615/10056/10352/55157/57505/57470/51520/4677/8565/79587/2058/79731/51067/7453/80222/10667/57038/3035/123283/3376/92935/283459/80755	30
GO:1902116	negative regulation of organelle assembly	30/8285	44/14199	0.119777	0.891171	0.8647	672/4134/10198/2665/23256/128866/9738/7016/4591/2648/56890/4117/8850/57489/55755/84260/4089/115704/51256/107080638/9638/9637/4534/55254/79598/8558/347240/120892/550643/10432	30
GO:0017015	regulation of transforming growth factor beta receptor signaling pathway	75/8285	117/14199	0.119842	0.891171	0.8647	1387/11171/3309/4052/28996/7049/8516/8425/2734/25805/3326/23411/2033/54976/55612/8312/857/2022/64081/64750/83891/112744/26036/4015/9480/7043/56937/4435/58533/9113/5468/9315/10253/7080/6498/6386/7057/4091/2201/5170/93649/7157/4089/63976/1030/6935/26524/6868/135228/54778/6497/10252/5654/161742/2200/4088/753/255743/203100/9839/3175/124857/4087/163126/51341/80139/283149/5465/399473/51592/79674/9719/2…	75
GO:0070613	regulation of protein processing	35/8285	52/14199	0.119863	0.891171	0.8647	26022/6196/2023/2734/4627/51098/1522/22900/55848/10162/5992/9532/7850/9528/79094/7057/5567/84236/29934/101/831/861/7123/4241/3818/11236/5621/143458/302/147372/6900/120892/6281/3633/10418	35
GO:0031060	regulation of histone methylation	48/8285	73/14199	0.120895	0.897592	0.87093	23028/55904/3720/10157/672/51230/9682/55183/546/1789/23411/10664/84148/23081/2625/6830/9555/55683/55818/4297/1786/23378/23168/80312/54934/80349/4089/23476/22823/80854/8473/54904/56254/22976/26053/26097/2672/90780/64324/1499/4204/10782/54880/7469/55693/340602/5079/9646	48
GO:0042147	retrograde transport, endosome to Golgi	56/8285	86/14199	0.121032	0.897592	0.87093	8938/9043/54497/6642/7260/55773/9341/7813/55737/8218/7879/23085/27131/83874/10490/10139/25963/8677/10652/57589/8729/9527/8724/8934/400/80148/9559/9367/25938/58533/9779/57533/10228/9648/9905/1213/51542/29934/112936/143187/84910/51560/7109/27236/22836/253725/5870/63893/150368/23258/5071/51479/120892/144717/6643/150786	56
GO:0007052	mitotic spindle organization	78/8285	122/14199	0.121661	0.9006	0.873849	26073/7756/10460/6683/7175/4134/55726/2009/387/8243/23332/284403/10403/10464/25978/51510/6790/22974/10726/24137/114327/25777/4605/8480/9371/128866/55125/10735/6795/56647/9126/3837/57562/7272/51652/4751/10274/10783/9525/6491/51119/9787/27243/5901/891/9493/3832/10579/1062/1213/83540/6867/64946/3192/126731/5116/29127/84142/23122/79884/23172/5347/4204/9793/79643/51115/9212/1104/79598/11200/4733/16518…	78
GO:0016055	Wnt signaling pathway	250/8285	408/14199	0.121744	0.9006	0.873849	51384/1856/440193/3670/25937/54764/25960/55789/8452/11063/5218/65125/10076/7089/259266/2263/387/55593/57560/55737/1459/2011/23291/10979/2239/79960/1906/5663/6932/2932/51701/25805/25/10042/9978/23002/57680/6789/54994/1457/55612/6907/2010/2254/8312/6299/7976/6788/51366/57664/5518/2116/1749/857/7472/2887/6424/2737/9275/10927/7091/23189/1855/2625/80351/22943/219771/54894/64750/90410/4790/595/4192/273…	250
GO:0034250	positive regulation of cellular amide metabolic process	95/8285	150/14199	0.122324	0.90375	0.876906	7812/23034/7431/8531/4904/1994/5315/54505/387/26986/8301/5337/1153/84271/51654/2332/5935/5611/22849/23185/6198/708/1982/11044/23107/8087/1981/23178/2043/10657/6125/27161/79072/6659/65109/440275/1968/22927/9475/10492/55226/1660/116496/84300/7057/1545/29081/3184/55132/10140/9775/343472/5433/8893/54915/114134/8872/60558/127933/3192/55364/55005/10600/285367/4690/10642/9619/113251/56339/26995/1938/543…	95
GO:0038095	Fc-epsilon receptor signaling pathway	16/8285	22/14199	0.12339	0.90707	0.880127	5601/6416/5588/4214/3551/5599/6654/5335/10451/6885/7409/2241/7410/6850/7189/5336	16
GO:0039702	viral budding via host ESCRT complex	16/8285	22/14199	0.12339	0.90707	0.880127	7251/25978/51510/128866/51652/9525/27243/27183/79720/93343/137492/11267/55048/10015/79643/57132	16
GO:0060045	positive regulation of cardiac muscle cell proliferation	16/8285	22/14199	0.12339	0.90707	0.880127	2263/7049/4208/2254/7472/657/2735/1432/6909/23493/2247/57057/3516/23414/983/2066	16
GO:0080182	histone H3-K4 trimethylation	16/8285	22/14199	0.12339	0.90707	0.880127	4800/55904/5926/9739/4297/23168/23067/80349/8473/80335/8085/3008/54790/57673/3006/9646	16
GO:0021987	cerebral cortex development	70/8285	109/14199	0.124512	0.908905	0.881907	23028/5048/10460/23224/259266/387/1459/284403/5663/2932/3912/114327/1399/3091/2737/9355/26468/57178/4192/221692/57142/6513/9928/8195/93986/2258/22903/54407/4677/6434/153090/81853/10579/471/63950/9353/6715/1956/79648/6867/4915/7804/5194/27185/285025/23353/7248/81565/1398/83696/1499/153241/6091/1000/653464/474/84750/1600/2290/8851/23236/5454/3014/5649/282991/5079/79633/4763/5455/317762	70
GO:0006891	intra-Golgi vesicle-mediated transport	23/8285	33/14199	0.124809	0.908905	0.881907	11345/9950/10490/25839/8775/11316/9570/9527/22818/1315/57511/8774/83548/143187/51560/26958/7109/91949/83452/5870/9276/84342/150786	23
GO:0035136	forelimb morphogenesis	23/8285	33/14199	0.124809	0.908905	0.881907	3207/546/23322/3209/7704/157506/7291/8434/860/3235/3236/8854/6926/7020/494470/80856/340419/4487/25836/1499/6474/140467/342184	23
GO:0038179	neurotrophin signaling pathway	23/8285	33/14199	0.124809	0.908905	0.881907	9564/26999/55816/2889/9693/8936/6654/5906/6272/57498/10253/4916/66000/4915/2674/118813/10252/9001/627/5781/23390/9863/4914	23
GO:0097484	dendrite extension	23/8285	33/14199	0.124809	0.908905	0.881907	51265/9043/23327/26999/6857/22999/9962/51760/59284/6456/8437/8936/53335/57699/23025/114804/66000/26053/9699/5071/50618/10479/57154	23
GO:2000780	negative regulation of double-strand break repair	23/8285	33/14199	0.124809	0.908905	0.881907	10721/7158/55183/23347/51366/9400/4968/54537/7291/78996/92797/79000/84893/8091/9320/115004/254225/80311/116028/64110/2187/55010/2074	23
GO:0044773	mitotic DNA damage checkpoint signaling	51/8285	78/14199	0.124819	0.908905	0.881907	672/4361/1112/54962/51512/8555/51720/51776/63967/4436/51322/79791/4683/51343/80279/595/900/79858/25949/6118/65975/51347/4193/90381/7157/51514/2177/472/1111/8091/144715/7508/146956/9577/29980/84142/11073/5347/55159/8738/983/5883/11200/51065/79184/135458/641/197342/91603/26058/5591	51
GO:0198738	cell-cell signaling by wnt	251/8285	410/14199	0.125807	0.908905	0.881907	51384/1856/440193/3670/25937/54764/25960/55789/8452/11063/5218/65125/10076/7089/259266/2263/387/55593/57560/55737/1459/2011/23291/10979/2239/79960/1906/5663/6932/2932/51701/25805/25/10042/9978/23002/57680/6789/54994/1457/55612/6907/2010/2254/8312/6299/7976/6788/51366/57664/5518/2116/1749/857/7472/2887/6424/2737/9275/10927/7091/23189/1855/2625/80351/22943/219771/54894/64750/90410/4790/595/4192/273…	251
GO:1904589	regulation of protein import	38/8285	57/14199	0.126181	0.908905	0.881907	999/7175/3843/5743/5663/55696/57506/3326/3717/55612/51366/9141/2737/51684/3312/1432/51715/1894/7341/51569/23435/5901/29969/53371/9531/7545/9868/284/9221/4088/11142/983/5569/3059/5587/4763/2316/84455	38
GO:0031623	receptor internalization	62/8285	96/14199	0.126842	0.908905	0.881907	84058/928/6642/84062/10203/4734/7037/8301/88455/634/4983/8898/7430/157/9463/79890/2332/59284/857/6424/1759/22943/975/7422/3208/4035/1948/2868/4289/9779/10266/10267/1742/967/54806/6386/84896/1950/1213/409/59283/375/57007/5868/26045/3688/284/3689/1173/6850/55788/11031/146395/3643/156/302/6900/9863/29978/5336/124930/6311	62
GO:0021762	substantia nigra development	28/8285	41/14199	0.127542	0.908905	0.881907	3309/387/4129/60/8655/2254/64426/5810/59345/515/11240/79109/1340/7533/10971/2247/9919/2746/9118/522/808/7707/57447/1152/64770/10409/4155/801	28
GO:0060147	regulation of post-transcriptional gene silencing	28/8285	41/14199	0.127542	0.908905	0.881907	23369/1994/10269/2332/1655/8087/1981/57510/7538/5468/4613/9698/84872/1660/9611/93649/7157/126374/8994/1956/7073/103/7015/6774/5604/9612/131405/373863	28
GO:1900368	regulation of post-transcriptional gene silencing by RNA	28/8285	41/14199	0.127542	0.908905	0.881907	23369/1994/10269/2332/1655/8087/1981/57510/7538/5468/4613/9698/84872/1660/9611/93649/7157/126374/8994/1956/7073/103/7015/6774/5604/9612/131405/373863	28
GO:0046324	regulation of glucose import	33/8285	49/14199	0.127628	0.908905	0.881907	3479/4205/8218/51548/114882/10580/208/2887/51422/6198/1389/1432/6814/6253/10776/55829/6041/55198/4609/207/2719/26060/1636/5584/28999/7015/79058/5319/3643/5781/8660/5167/23596	33
GO:0072523	purine-containing compound catabolic process	33/8285	49/14199	0.127628	0.908905	0.881907	22875/5151/38/22978/11332/25939/23417/4521/10846/10591/8622/5144/84618/30833/272/4907/55270/8654/7498/5152/3251/3094/27115/5142/5138/1806/100/9583/131870/5150/390916/11165/79873	33
GO:0000281	mitotic cytokinesis	46/8285	70/14199	0.128422	0.908905	0.881907	26073/54902/54443/6683/9820/387/6093/25978/51510/24137/114327/128866/9094/11021/10112/1894/51652/9525/10617/51429/27243/27183/4628/9475/324/26586/51203/9493/403/55165/9585/9101/375/388/5921/3619/55521/129531/6651/29127/79884/5347/10015/341019/79643/57132	46
GO:0030512	negative regulation of transforming growth factor beta receptor signaling pathway	46/8285	70/14199	0.128422	0.908905	0.881907	11171/3309/4052/7049/2734/25805/23411/857/64081/64750/83891/26036/9480/7043/56937/58533/5468/10253/7080/6498/4091/2201/5170/7157/63976/6868/135228/6497/10252/5654/161742/2200/753/203100/3175/124857/163126/51341/283149/5465/399473/79674/9719/200734/57154/23089	46
GO:0048017	inositol lipid-mediated signaling	93/8285	147/14199	0.128649	0.908905	0.881907	51384/5286/1634/3479/3082/9846/23026/80243/5291/4734/56005/5337/2260/5289/1906/634/57605/55763/7430/7042/23411/3717/5332/4150/8395/2625/59338/219699/6198/708/867/4883/7337/23007/2335/84812/5334/847/5290/7291/10617/10385/5342/5287/5156/79899/153090/55165/2247/1950/3480/4916/207/8394/57624/56034/1956/8473/4915/56623/25827/284/118788/3815/113026/5783/4824/197358/4920/5747/25948/80310/3643/10125/767/…	93
GO:0045137	development of primary sexual characteristics	119/8285	190/14199	0.12867	0.908905	0.881907	3207/7812/2067/10046/5926/1495/3309/4254/51742/2296/4438/8531/259266/10371/4036/546/7042/4436/23411/1399/23598/11144/22862/2254/6299/23205/268/4521/7046/2625/59338/2253/595/867/57122/7422/7337/7474/6382/2309/157506/81930/92/10549/3623/8195/128637/8894/117154/599/9667/5914/3021/4678/3295/7482/10468/192670/5156/269/83990/2516/4609/152006/1761/1545/3417/658/675/409/4089/6647/7110/9353/8893/6715/1018…	119
GO:0090263	positive regulation of canonical Wnt signaling pathway	65/8285	101/14199	0.12933	0.908905	0.881907	25960/65125/259266/2263/55737/25805/54994/6907/2254/51366/57664/1749/857/6424/23189/80351/64750/4790/5754/9037/9736/79971/81847/7320/8434/79809/6659/1455/9101/2247/1950/1453/63977/84870/1956/2719/340419/1456/3087/79705/27123/1896/65268/51339/4088/51704/1613/3516/4920/53944/9839/55031/8607/23399/79718/2262/130574/130612/120892/9679/55366/147699/1454/1654/8629	65
GO:0032069	regulation of nuclease activity	14/8285	19/14199	0.129503	0.908905	0.881907	1663/4938/23411/7014/5111/7009/79661/207/7013/6188/1676/3148/6059/4869	14
GO:0036092	phosphatidylinositol-3-phosphate biosynthetic process	14/8285	19/14199	0.129503	0.908905	0.881907	5286/3631/5291/5289/8871/8821/9896/5290/22863/5287/472/8867/30849/7405	14
GO:0046931	pore complex assembly	14/8285	19/14199	0.129503	0.908905	0.881907	55706/4928/57122/57142/9972/4301/102/25909/23165/10694/340348/7203/144100/196527	14
GO:0050857	positive regulation of antigen receptor-mediated signaling pathway	14/8285	19/14199	0.129503	0.908905	0.881907	5583/975/27086/8934/5819/123920/8915/6188/10666/5579/3932/100/57181/8517	14
GO:0060479	lung cell differentiation	14/8285	19/14199	0.129503	0.908905	0.881907	79977/55151/3202/4048/1385/25803/7067/3169/2302/4781/7068/60485/1499/3516	14
GO:0101023	vascular endothelial cell proliferation	14/8285	19/14199	0.129503	0.908905	0.881907	51548/2260/4208/4192/3676/5335/5468/2247/5170/6868/51738/6774/1285/6667	14
GO:1905562	regulation of vascular endothelial cell proliferation	14/8285	19/14199	0.129503	0.908905	0.881907	51548/2260/4208/4192/3676/5335/5468/2247/5170/6868/51738/6774/1285/6667	14
GO:2000042	negative regulation of double-strand break repair via homologous recombination	14/8285	19/14199	0.129503	0.908905	0.881907	10721/7158/55183/23347/9400/54537/92797/84893/115004/80311/116028/64110/2187/55010	14
GO:0071456	cellular response to hypoxia	79/8285	124/14199	0.130028	0.908905	0.881907	8837/5291/28996/5165/6095/5743/2023/57103/1906/3776/23411/3162/3091/6547/655/51378/5230/10397/665/51142/7422/2030/8614/26355/2034/2043/4985/2309/1788/25950/7291/5740/50809/2792/112399/5468/7428/9475/29979/4193/83990/6326/4609/84709/7009/9520/7157/5366/890/101/5163/79723/56776/571/6781/7015/1536/538/360/219736/55662/4824/10449/3516/5581/596/10869/79625/947/6546/3654/3751/5034/677/30001/4194/2475/1…	79
GO:0009165	nucleotide biosynthetic process	140/8285	225/14199	0.131183	0.908905	0.881907	204/10165/65220/60481/159/56474/50484/2983/4199/5165/80347/2182/2023/38/9605/32/27231/108/1738/139596/11332/6576/4522/5634/23417/4833/23475/23205/2639/10135/2617/3614/51422/203/506/83594/8382/7372/523/1716/8604/8942/271/515/6785/113/3208/8034/2181/514/5740/51000/27109/80025/10606/1854/1635/83549/5538/47/5160/272/517/4609/109/471/83666/60490/9061/5636/29922/7371/55811/142/5631/50808/51144/134145/1…	140
GO:0007044	cell-substrate junction assembly	57/8285	88/14199	0.131465	0.908905	0.881907	26073/7414/2042/22998/9748/1308/387/6093/9448/87/10979/23332/3655/10580/25/8829/9647/8874/10391/1845/23603/56940/7422/57669/2335/9270/23499/3691/5786/9475/3915/55901/5879/7094/7057/54828/8394/51057/90102/5795/667/23122/7248/4088/1613/11170/5747/3987/596/79834/5339/71/1946/613/6281/8861/342184	57
GO:0010717	regulation of epithelial to mesenchymal transition	57/8285	88/14199	0.131465	0.908905	0.881907	3670/25937/23187/2042/2296/10979/23332/7042/25805/655/2146/7046/2022/2625/4192/653/5515/90/2043/4139/7043/7291/152007/6615/3169/10439/4017/10253/7080/153090/6386/4089/90102/6934/7074/10630/23122/10252/57057/161742/4088/1499/8313/753/1605/4087/205717/8092/9241/80139/283149/23275/399473/3066/147906/200734/2475	57
GO:0007292	female gamete generation	82/8285	129/14199	0.131544	0.908905	0.881907	2067/3479/64848/4438/259266/6196/9319/5743/4292/1906/10403/79670/6790/23411/11144/268/6795/5518/5764/57178/5889/4192/254394/26271/7272/6654/79084/2309/27030/84930/23397/8239/78995/7153/3021/56907/23318/4609/1761/6194/54852/658/8654/2120/675/6875/1730/472/1909/9510/56776/9133/10361/130951/11077/163589/4880/3248/2661/9897/56339/5347/8085/1499/7314/596/5139/339834/344758/8061/317761/221400/8204/8394…	82
GO:1903052	positive regulation of proteolysis involved in cellular protein catabolic process	82/8285	129/14199	0.131544	0.908905	0.881907	2729/54467/114881/51667/9604/8554/25897/5601/8975/4287/28951/55743/23609/51548/5663/2932/5705/6790/25831/9978/5716/2332/8312/9810/6449/51343/857/1855/1075/9532/1452/7341/127544/440730/29979/23287/84900/4193/153090/255488/55212/1950/91445/144165/160418/1453/207/64326/154214/6872/9781/57630/153769/10444/5701/79699/7805/27185/25898/285671/25820/5347/26263/5747/11236/344558/10221/26259/64110/10425/58…	82
GO:0060284	regulation of cell development	271/8285	444/14199	0.131651	0.908905	0.881907	23028/3207/26022/51265/5048/6792/7869/23376/3479/22902/25960/5583/7414/27067/9820/1495/23105/816/9423/23013/57609/9682/259266/6093/55679/10979/9175/10371/10512/284403/5362/5063/2192/4133/5108/7161/7520/55604/5991/5663/4036/54437/2932/9706/5978/51593/118/6790/57091/393/51726/10683/57556/25/8829/1399/11078/51199/3091/23405/23394/655/4168/8874/79006/79791/7976/3551/84079/9253/6223/5802/5764/7472/580…	271
GO:0048193	Golgi vesicle transport	173/8285	280/14199	0.13182	0.908905	0.881907	79090/9265/27032/63932/6683/114879/6642/286/9135/11345/8452/57120/9341/55850/23041/9950/10640/3998/25956/27252/56681/23033/10890/9522/2060/10959/9183/55614/55763/23256/8773/9117/372/9463/11015/10490/9321/10484/10139/10483/9218/25839/23062/57020/8775/11316/10282/10652/11196/8729/114815/9570/9527/83871/22818/8724/55770/64083/10802/57222/662/10342/22937/29959/149371/59349/8548/50999/51552/84272/8406…	173
GO:0021772	olfactory bulb development	21/8285	30/14199	0.132709	0.908905	0.881907	10371/6299/23322/1749/4967/9355/7474/3398/1746/9928/389549/23287/9353/6497/123016/6091/55636/2066/2131/6092/120892	21
GO:0036258	multivesicular body assembly	21/8285	30/14199	0.132709	0.908905	0.881907	51534/7251/25978/51510/128866/51652/9525/27243/27183/51028/8027/79720/93343/137492/11267/55048/10015/79643/9798/9146/57132	21
GO:0070979	protein K11-linked ubiquitination	21/8285	30/14199	0.132709	0.908905	0.881907	996/29945/7319/51619/51433/55284/51343/7323/7320/8881/64682/10393/79102/11065/29882/7325/5071/7332/7328/51434/171222	21
GO:0030166	proteoglycan biosynthetic process	36/8285	54/14199	0.134356	0.908905	0.881907	2137/64132/3479/7358/29940/10090/135152/9917/64377/9375/9953/22856/55501/9394/64579/658/56548/55790/6934/26229/2132/9653/83539/92370/2135/8509/1499/55454/90161/126792/51363/2131/266722/337876/659/222537	36
GO:0000097	sulfur amino acid biosynthetic process	8285-12-01	16/14199	0.13522	0.908905	0.881907	84245/4507/2678/4522/4548/4552/1036/58478/51074/875/102724560/441024	12
GO:0030575	nuclear body organization	8285-12-01	16/14199	0.13522	0.908905	0.881907	28996/7341/22927/10208/2113/6733/26135/8444/2334/7536/373509/79607	12
GO:0048532	anatomical structure arrangement	8285-12-01	16/14199	0.13522	0.908905	0.881907	3309/10371/5076/8829/657/9928/8828/55558/7020/1600/3212/91584	12
GO:0071731	response to nitric oxide	8285-12-01	16/14199	0.13522	0.908905	0.881907	8837/1800/2983/4548/7295/3184/890/2308/498/9131/1398/358	12
GO:0090231	regulation of spindle checkpoint	8285-12-01	16/14199	0.13522	0.908905	0.881907	7175/10403/9587/7517/55795/891/55755/51143/4085/81620/348654/51451	12
GO:0090266	regulation of mitotic cell cycle spindle assembly checkpoint	8285-12-01	16/14199	0.13522	0.908905	0.881907	7175/10403/9587/7517/55795/891/55755/51143/4085/81620/348654/51451	12
GO:0140354	lipid import into cell	8285-12-01	16/14199	0.13522	0.908905	0.881907	10998/208/6198/6513/2181/80763/2058/7057/11001/207/10999/8660	12
GO:1902170	cellular response to reactive nitrogen species	8285-12-01	16/14199	0.13522	0.908905	0.881907	8837/1800/2983/4548/3184/890/2308/498/9131/1398/4217/358	12
GO:1903504	regulation of mitotic spindle checkpoint	8285-12-01	16/14199	0.13522	0.908905	0.881907	7175/10403/9587/7517/55795/891/55755/51143/4085/81620/348654/51451	12
GO:0061982	meiosis I cell cycle process	74/8285	116/14199	0.135452	0.908905	0.881907	2067/4361/23304/5888/4438/55706/9319/4292/7155/55063/10403/8438/6790/11144/5889/10635/26271/10111/2956/7320/27030/84057/3306/151648/29893/7153/56154/192670/83990/29988/1761/50511/675/2177/1060/256006/7013/472/83447/10018/146956/56776/9133/995/130951/11077/164045/151246/993/5885/23353/7589/5347/145645/7314/339834/79703/2072/80010/317761/5890/5892/57697/84464/10388/25788/197342/6847/22887/100130958…	74
GO:0060324	face development	31/8285	46/14199	0.136017	0.908905	0.881907	79977/5594/2033/83716/1749/7763/59338/22943/4621/7474/22930/7043/3213/8195/8854/5914/5156/84159/1909/6497/4487/25976/25836/8879/29123/5604/55636/5781/9241/444/5083	31
GO:0051963	regulation of synapse assembly	52/8285	80/14199	0.136117	0.908905	0.881907	27067/9423/55737/2239/4208/23394/79953/27286/22943/5818/23316/7474/1981/577/2045/347902/4916/351/26045/4915/2895/10160/5789/2047/51738/8321/64084/100528062/10611/145581/382/55209/22871/4884/22883/257194/386724/627/5021/575/10082/1946/6092/23768/6585/10507/375790/3556/54413/4914/80823/8292	52
GO:0006364	rRNA processing	138/8285	222/14199	0.137032	0.908905	0.881907	115939/51096/51106/23517/51602/57602/10885/23016/22894/51729/8602/8886/22803/51575/23481/10521/5303/90459/10775/6217/6223/51010/10360/23560/117246/55813/54433/11103/4839/23195/705/8850/6209/84128/79954/80135/54680/79033/387338/55127/54853/11340/27340/130916/6125/29960/10199/10799/51119/10436/92797/79066/23404/1736/25926/6155/23378/57050/54663/134430/55226/10200/6041/11137/54606/92856/11224/6194/6…	138
GO:0048608	reproductive structure development	226/8285	369/14199	0.137622	0.908905	0.881907	2288/3207/7812/2067/10046/5926/9820/1495/3309/4254/51742/2296/4438/639/8531/841/51665/259266/2263/22846/26528/5743/10371/1739/4036/79977/8648/546/4216/10959/3294/25831/7042/4436/3326/23411/1399/5594/23598/79879/11144/51493/8846/3091/6789/655/22862/2254/6299/23205/6788/268/2116/5764/7472/10049/3209/4521/2737/7046/2625/59338/2253/595/329/867/1594/2735/7421/57122/1432/653/7422/9421/8614/7337/7474/32…	226
GO:0061387	regulation of extent of cell growth	66/8285	103/14199	0.139078	0.908905	0.881907	51265/5048/6792/7869/22902/23105/9423/57609/9175/10371/10512/4133/54437/2932/9706/393/4897/57556/1808/25/8829/23394/5802/3984/6387/1982/7422/9037/7474/150465/57142/2335/23499/6049/2258/10439/55558/23111/2045/10505/9856/80031/343472/2803/223117/118813/27185/4825/81565/57611/25942/9723/23566/29882/627/8851/8408/9798/1946/6585/57698/10507/2664/659/91584/11344	66
GO:0001833	inner cell mass cell proliferation	8285-10-01	13/14199	0.139879	0.908905	0.881907	79728/9837/51119/675/54892/84296/1111/53918/9318/81565	10
GO:0009214	cyclic nucleotide catabolic process	8285-10-01	13/14199	0.139879	0.908905	0.881907	5151/10846/8622/5144/8654/5152/27115/5142/5138/5150	10
GO:0014841	skeletal muscle satellite cell proliferation	8285-10-01	13/14199	0.139879	0.908905	0.881907	8837/3717/3836/2660/2247/84466/284/2047/79647/147912	10
GO:0018206	peptidyl-methionine modification	8285-10-01	13/14199	0.139879	0.908905	0.881907	10988/80018/335/60560/23173/80155/79612/254042/51126/64146	10
GO:0031053	primary miRNA processing	8285-10-01	13/14199	0.139879	0.908905	0.881907	51593/29102/3181/54487/56339/4088/6774/4087/389421/1654	10
GO:0032486	Rap protein signal transduction	8285-10-01	13/14199	0.139879	0.908905	0.881907	27352/2889/9693/867/5906/9928/57826/5911/5908/5962	10
GO:0033147	negative regulation of intracellular estrogen receptor signaling pathway	8285-10-01	13/14199	0.139879	0.908905	0.881907	672/3670/4848/23019/9125/9420/29966/25959/81606/11331	10
GO:0035278	miRNA-mediated gene silencing by inhibition of translation	8285-10-01	13/14199	0.139879	0.908905	0.881907	57690/27327/26523/23112/27161/192669/7538/192670/5936/131405	10
GO:0035331	negative regulation of hippo signaling	8285-10-01	13/14199	0.139879	0.908905	0.881907	5606/55841/4140/1432/23286/126374/9686/8994/80014/22941	10
GO:0035435	phosphate ion transmembrane transport	8285-10-01	13/14199	0.139879	0.908905	0.881907	5250/11095/219855/9213/6574/56172/54020/6575/253512/1468	10
GO:0042308	negative regulation of protein import into nucleus	8285-10-01	13/14199	0.139879	0.908905	0.881907	55612/51684/51715/7341/51569/29969/284/11142/5569/4763	10
GO:0044065	regulation of respiratory system process	8285-10-01	13/14199	0.139879	0.908905	0.881907	26164/2744/57616/79068/92170/30012/5090/4204/22871/54413	10
GO:0044849	estrous cycle	8285-10-01	13/14199	0.139879	0.908905	0.881907	23394/5764/4192/4988/5111/1545/3480/7226/5021/9612	10
GO:0044872	lipoprotein localization	8285-10-01	13/14199	0.139879	0.908905	0.881907	81671/8029/9094/4035/5468/51128/375056/51304/5579/23390	10
GO:0045725	positive regulation of glycogen biosynthetic process	8285-10-01	13/14199	0.139879	0.908905	0.881907	3479/10580/208/2645/8445/207/3643/9852/8660/90673	10
GO:0051767	nitric-oxide synthase biosynthetic process	8285-10-01	13/14199	0.139879	0.908905	0.881907	5606/1906/3717/3718/10135/5608/6772/9590/55829/120892	10
GO:0051769	regulation of nitric-oxide synthase biosynthetic process	8285-10-01	13/14199	0.139879	0.908905	0.881907	5606/1906/3717/3718/10135/5608/6772/9590/55829/120892	10
GO:0060008	Sertoli cell differentiation	8285-10-01	13/14199	0.139879	0.908905	0.881907	5926/51742/546/22862/6382/9667/5914/3295/1761/4914	10
GO:0061615	glycolytic process through fructose-6-phosphate	8285-10-01	13/14199	0.139879	0.908905	0.881907	5214/2023/2645/2584/3607/5211/5213/3098/83440/221937	10
GO:0097468	programmed cell death in response to reactive oxygen species	8285-10-01	13/14199	0.139879	0.908905	0.881907	3082/25/4233/11235/10494/11315/2309/10131/5074/494513	10
GO:1900006	positive regulation of dendrite development	8285-10-01	13/14199	0.139879	0.908905	0.881907	25/655/5764/23242/54664/2146/653/153090/7436/7804	10
GO:1904590	negative regulation of protein import	8285-10-01	13/14199	0.139879	0.908905	0.881907	55612/51684/51715/7341/51569/29969/284/11142/5569/4763	10
GO:1903201	regulation of oxidative stress-induced cell death	39/8285	59/14199	0.140156	0.908905	0.881907	2534/3082/5151/5978/23411/25/25793/3091/4233/3315/135112/8382/27429/11315/6421/2309/10131/468/51765/29979/3586/7295/6647/7226/207/4170/142/23657/8321/55074/7248/9529/5598/1499/5074/5071/5034/120892/2876	39
GO:1903363	negative regulation of cellular protein catabolic process	47/8285	72/14199	0.140727	0.908905	0.881907	11345/28996/55737/1459/27074/4983/5663/51322/3326/1457/9097/9683/55353/6449/57589/51684/80279/2043/11315/6125/9349/5582/84074/64844/153090/6386/5045/6135/11011/6872/8473/8667/29761/23400/819/4745/9529/4534/6201/10869/143941/80011/6599/302/2272/258010/65992	47
GO:0006457	protein folding	115/8285	184/14199	0.141172	0.908905	0.881907	2288/23386/23071/3309/10294/3998/54431/3320/10450/3301/8425/10726/51726/3326/23759/10598/5203/80331/1457/5611/9141/11140/27000/10049/3315/57003/7466/80273/1410/3312/10728/9532/3313/7265/4820/7841/10575/10190/5768/64175/23184/22926/2281/6950/10808/64374/11328/10549/6903/8195/10131/3306/6388/51303/10574/56886/64215/27348/1861/51645/9360/55898/10130/3329/54788/22948/55768/26278/9531/10283/1047/5903/…	115
GO:0009264	deoxyribonucleotide catabolic process	19/8285	27/14199	0.141173	0.908905	0.881907	51071/51733/25939/4968/84618/23583/30833/1854/8930/55270/6996/79661/252969/7498/1806/100/131870/56953/79873	19
GO:0034063	stress granule assembly	19/8285	27/14199	0.141173	0.908905	0.881907	7812/23369/1153/1656/23215/1965/2886/10146/203228/54915/636/5563/11273/253943/6228/1778/51441/6311/1654	19
GO:0034453	microtubule anchoring	19/8285	27/14199	0.141173	0.908905	0.881907	23332/5108/2932/51199/22981/56647/11127/9857/9648/5195/90060/636/158297/23122/9702/84376/1605/84984/283726	19
GO:0060441	epithelial tube branching involved in lung morphogenesis	19/8285	27/14199	0.141173	0.908905	0.881907	2263/1522/284217/1512/7472/3202/157506/6909/3169/3845/7482/10253/7080/340419/10252/64399/1499/1605/2131	19
GO:0071480	cellular response to gamma radiation	19/8285	27/14199	0.141173	0.908905	0.881907	23028/3309/5888/1535/7520/10269/51776/1410/4193/7157/11011/472/7486/598/545/11200/3014/2547/404672	19
GO:0000098	sulfur amino acid catabolic process	8285-08-01	10/14199	0.142031	0.908905	0.881907	4552/4357/7263/1036/51380/4143/875/102724560	8
GO:0000338	protein deneddylation	8285-08-01	10/14199	0.142031	0.908905	0.881907	10987/1861/51138/8533/64708/9318/10980/10920	8
GO:0002084	protein depalmitoylation	8285-08-01	10/14199	0.142031	0.908905	0.881907	11313/26090/51104/5538/58489/84945/127018/55347	8
GO:0003084	positive regulation of systemic arterial blood pressure	8285-08-01	10/14199	0.142031	0.908905	0.881907	1535/65125/387/148/80763/1636/552/7026	8
GO:0006735	NADH regeneration	8285-08-01	10/14199	0.142031	0.908905	0.881907	5214/2023/2645/3607/5211/5213/3098/221937	8
GO:0009128	purine nucleoside monophosphate catabolic process	8285-08-01	10/14199	0.142031	0.908905	0.881907	22978/84618/30833/272/4907/7498/3251/100	8
GO:0009155	purine deoxyribonucleotide catabolic process	8285-08-01	10/14199	0.142031	0.908905	0.881907	25939/84618/30833/55270/7498/100/131870/79873	8
GO:0009169	purine ribonucleoside monophosphate catabolic process	8285-08-01	10/14199	0.142031	0.908905	0.881907	22978/84618/30833/272/4907/7498/3251/100	8
GO:0009415	response to water	8285-08-01	10/14199	0.142031	0.908905	0.881907	5311/84918/5290/4609/552/5339/4914/6494	8
GO:0031953	negative regulation of protein autophosphorylation	8285-08-01	10/14199	0.142031	0.908905	0.881907	9961/857/2022/7016/54206/55364/3725/5167	8
GO:0032000	positive regulation of fatty acid beta-oxidation	8285-08-01	10/14199	0.142031	0.908905	0.881907	208/1374/7291/225/205251/8660/5465/440503	8
GO:0032252	secretory granule localization	8285-08-01	10/14199	0.142031	0.908905	0.881907	4133/10749/547/8615/8499/3799/26115/10125	8
GO:0032261	purine nucleotide salvage	8285-08-01	10/14199	0.142031	0.908905	0.881907	1716/271/272/132/1633/3251/100/158	8
GO:0033632	regulation of cell-cell adhesion mediated by integrin	8285-08-01	10/14199	0.142031	0.908905	0.881907	65125/9780/5420/23075/8631/83706/10563/100	8
GO:0035865	cellular response to potassium ion	8285-08-01	10/14199	0.142031	0.908905	0.881907	6558/1742/79800/6647/1393/1740/140609/4884	8
GO:0045161	neuronal ion channel clustering	8285-08-01	10/14199	0.142031	0.908905	0.881907	4897/9463/30819/23787/132320/6900/342035/375790	8
GO:0048194	Golgi vesicle budding	8285-08-01	10/14199	0.142031	0.908905	0.881907	10959/8729/64083/55204/84364/5584/10972/26286	8
GO:0051770	positive regulation of nitric-oxide synthase biosynthetic process	8285-08-01	10/14199	0.142031	0.908905	0.881907	5606/3717/3718/10135/5608/6772/9590/120892	8
GO:0061621	canonical glycolysis	8285-08-01	10/14199	0.142031	0.908905	0.881907	5214/2023/2645/3607/5211/5213/3098/221937	8
GO:0061718	glucose catabolic process to pyruvate	8285-08-01	10/14199	0.142031	0.908905	0.881907	5214/2023/2645/3607/5211/5213/3098/221937	8
GO:0070243	regulation of thymocyte apoptotic process	8285-08-01	10/14199	0.142031	0.908905	0.881907	3091/3718/7474/7157/84524/101/5896/100	8
GO:0070572	positive regulation of neuron projection regeneration	8285-08-01	10/14199	0.142031	0.908905	0.881907	3082/8428/5764/2281/3480/81565/2316/1270	8
GO:0071415	cellular response to purine-containing compound	8285-08-01	10/14199	0.142031	0.908905	0.881907	79041/55151/7226/1111/5028/6546/6261/6263	8
GO:0071801	regulation of podosome assembly	8285-08-01	10/14199	0.142031	0.908905	0.881907	5601/387/6624/64147/3055/3936/4478/50807	8
GO:0072711	cellular response to hydroxyurea	8285-08-01	10/14199	0.142031	0.908905	0.881907	1663/5888/546/2332/8914/23514/641/84301	8
GO:0140719	constitutive heterochromatin assembly	8285-08-01	10/14199	0.142031	0.908905	0.881907	51548/55183/23347/2146/2145/3070/3021/201161	8
GO:1900747	negative regulation of vascular endothelial growth factor signaling pathway	8285-08-01	10/14199	0.142031	0.908905	0.881907	1634/25960/5291/57556/10253/153090/7498/3592	8
GO:1904754	positive regulation of vascular associated smooth muscle cell migration	8285-08-01	10/14199	0.142031	0.908905	0.881907	2254/3488/85440/9732/80005/9510/7015/538	8
GO:1904851	positive regulation of establishment of protein localization to telomere	8285-08-01	10/14199	0.142031	0.908905	0.881907	10575/6950/1736/10574/22948/10694/7203/10576	8
GO:1904896	ESCRT complex disassembly	8285-08-01	10/14199	0.142031	0.908905	0.881907	51534/25978/51510/9525/27243/27183/9798/57132	8
GO:1904903	ESCRT III complex disassembly	8285-08-01	10/14199	0.142031	0.908905	0.881907	51534/25978/51510/9525/27243/27183/9798/57132	8
GO:1905165	regulation of lysosomal protein catabolic process	8285-08-01	10/14199	0.142031	0.908905	0.881907	55737/4036/51257/55353/4035/3949/23400/256471	8
GO:2000434	regulation of protein neddylation	8285-08-01	10/14199	0.142031	0.908905	0.881907	54165/3091/23142/2034/6125/84259/6135/55208	8
GO:2000601	positive regulation of Arp2/3 complex-mediated actin nucleation	8285-08-01	10/14199	0.142031	0.908905	0.881907	10787/8976/8936/10810/9873/10152/10163/55845	8
GO:0007080	mitotic metaphase plate congression	34/8285	51/14199	0.143183	0.914112	0.88696	8452/54908/10403/10464/25978/81929/51510/9183/10726/128866/3837/51652/9928/9525/81930/27243/27183/891/55143/1062/83540/27436/1060/91272/113130/3192/81620/79003/79643/51115/9212/283489/54984/57132	34
GO:0014910	regulation of smooth muscle cell migration	34/8285	51/14199	0.143183	0.914112	0.88696	3479/387/4208/8829/328/2254/657/6198/4192/5361/3488/85440/4035/9732/4609/6653/80031/1545/7168/93649/9353/2768/80005/9510/1636/6282/7015/538/1398/80310/596/10221/5592/5154	34
GO:0002262	myeloid cell homeostasis	92/8285	146/14199	0.143311	0.914112	0.88696	55904/23376/5926/4254/5291/10758/28996/6688/7049/23210/79876/10296/3717/3162/23774/3091/22985/6223/1777/3718/2116/1021/3202/2625/80279/3216/1432/60682/7422/3313/4090/6772/3398/2034/5052/2309/92/3071/3623/116151/5469/7067/7538/2113/91/23456/3658/11143/6194/6229/29766/121260/5925/6647/8444/3707/54977/55646/54892/23657/6868/10018/10461/1054/3815/2176/5316/103/6886/25893/23385/28982/3148/94081/6208/8…	92
GO:0072594	establishment of protein localization to organelle	249/8285	408/14199	0.143722	0.915116	0.887934	4074/3920/5898/27072/7095/637/11231/23633/8504/999/9765/3309/7175/55187/57602/10758/29927/23534/3843/9697/55176/1994/23471/55746/4734/1459/6720/5743/7251/617/3998/7879/27074/5663/3320/10890/2646/3301/51194/55696/10075/57506/10762/23511/3326/3717/51100/55506/26517/89781/56993/25793/25813/6729/4792/6789/55612/128866/2254/3839/10204/83752/6788/54332/51366/665/6449/10469/9141/92609/30000/59284/9512/2…	249
GO:0019080	viral gene expression	61/8285	95/14199	0.144757	0.915116	0.887934	6482/7812/2530/51773/9474/6882/64710/6480/11043/905/2932/5978/55741/111089941/7023/51386/2033/7392/8662/8661/4124/1452/28972/7841/3065/23435/51193/6487/6597/7538/440275/60559/8666/4245/6737/51763/29969/1660/2959/6741/83666/5045/1939/9140/8091/7342/1105/81559/6483/23076/4247/81603/51574/11253/3725/25834/256435/6667/10614/5094/28985	61
GO:0009451	RNA modification	98/8285	156/14199	0.145008	0.915116	0.887934	115939/51106/54888/54802/6894/60487/55623/8518/23210/339175/51726/16/54517/55687/8846/51654/64863/123263/56986/117246/54433/26610/83480/4839/63892/387338/81627/54482/29960/23091/79828/57505/10436/57570/79066/64172/83448/84705/1736/55140/25917/54522/25821/55226/23070/96764/91801/80745/29081/6741/79068/51093/51002/54901/79691/285381/152992/285367/10785/103/127253/64783/129450/54502/25962/158234/563…	98
GO:0000731	DNA synthesis involved in DNA repair	24/8285	35/14199	0.145019	0.915116	0.887934	26073/5980/83932/5424/10714/23411/5427/11201/5422/9100/5425/51426/56897/78995/5111/5983/51455/51514/25898/201973/7486/5429/5426/6847	24
GO:0019068	virion assembly	24/8285	35/14199	0.145019	0.915116	0.887934	51534/4734/7251/25978/51510/128866/1656/28972/51652/9525/128637/27243/27183/79720/93343/90678/9712/137492/11267/55048/10015/79643/89853/57132	24
GO:0010171	body morphogenesis	29/8285	43/14199	0.145099	0.915116	0.887934	23187/23332/2033/83716/1749/59338/22943/4621/22930/7043/5156/90102/2719/84159/6497/23528/28982/4487/23122/25976/55764/25836/8879/29123/1605/5781/9241/444/5083	29
GO:0061462	protein localization to lysosome	29/8285	43/14199	0.145099	0.915116	0.887934	4074/3920/9765/4734/7879/59284/3312/975/79158/57142/23163/23677/27183/8546/79589/6272/9475/9648/6653/59283/23400/7805/55788/144577/26985/9146/389541/23334/8031	29
GO:0098534	centriole assembly	29/8285	43/14199	0.145099	0.915116	0.887934	672/284403/55125/9738/22995/4591/2648/56890/8850/7840/9525/6491/27243/55755/10733/55835/163786/221908/80817/85459/153241/9662/284001/25914/100653515/4869/9851/345643/10432	29
GO:1902895	positive regulation of miRNA transcription	29/8285	43/14199	0.145099	0.915116	0.887934	6688/6720/7042/3091/688/2625/657/2908/2309/6597/5468/2113/3586/9314/4609/4091/2247/7157/4089/7015/4088/6774/8061/3725/2624/7490/57496/7003/57591	29
GO:0010827	regulation of glucose transmembrane transport	42/8285	64/14199	0.14518	0.915116	0.887934	3479/4205/8218/51548/1906/114882/10580/208/2887/51422/6198/1389/9847/1432/6814/6253/10776/55829/51763/6041/55198/4609/207/2719/1909/26060/673/2695/1636/5584/28999/7015/252983/5579/79058/5319/3643/5781/8660/5167/23596/6248	42
GO:2000134	negative regulation of G1/S transition of mitotic cell cycle	42/8285	64/14199	0.14518	0.915116	0.887934	2273/23026/51512/1739/79960/5933/51322/25793/79791/5934/2146/595/90/6118/5311/10385/324/4193/10457/9314/5925/7157/58190/1030/138151/472/3275/51339/29117/7465/11170/55159/8738/596/51379/11200/51065/25959/79027/57165/26058/5591	42
GO:0046822	regulation of nucleocytoplasmic transport	64/8285	100/14199	0.14704	0.92585	0.898349	54888/999/7175/4659/3843/4734/5743/5663/2932/7514/55696/57506/3326/3717/5905/55612/2010/51366/2737/51684/6830/11052/1432/51715/1894/22916/7341/11315/55051/51569/23435/10657/9972/8021/5901/64328/29969/1660/7295/10541/51496/580/53371/6934/9531/5784/127933/7545/284/9221/4088/11142/983/5569/5936/5781/3059/29072/2621/5587/5501/4763/2316/84455	64
GO:0044774	mitotic DNA integrity checkpoint signaling	53/8285	82/14199	0.147735	0.929228	0.901627	672/4361/1112/54962/51512/8555/4998/51720/51776/63967/990/4436/51322/79791/4683/51343/80279/595/900/79858/25949/6118/65975/51347/4193/90381/7157/51514/2177/472/1111/8091/144715/7508/146956/9577/29980/84142/11073/5347/55159/8738/983/5883/11200/51065/79184/135458/641/197342/91603/26058/5591	53
GO:0001952	regulation of cell-matrix adhesion	67/8285	105/14199	0.14908	0.930015	0.90239	26073/7414/2042/340533/5291/22998/9748/387/5590/6093/9448/10979/23332/2932/25/8829/9647/55612/1021/1845/683/23603/56940/7422/57669/9270/9480/3204/23499/54453/5786/9475/5879/7057/8631/54828/50488/51057/90102/5921/8573/1029/5795/7402/27185/23122/7248/4088/1613/11170/5747/59339/3987/3175/9723/596/1605/79834/340485/71/1946/10519/4771/4763/6281/8861/342184	67
GO:0034605	cellular response to heat	37/8285	56/14199	0.149289	0.930015	0.90239	1387/7175/4287/5743/3320/2932/3326/23411/3162/2033/5931/27000/22797/10049/27429/7341/55107/1965/7057/5433/472/9531/81570/9261/10569/7266/3310/947/545/3654/3066/7442/4763/2475/440498/3281/10016	37
GO:0009166	nucleotide catabolic process	45/8285	69/14199	0.149551	0.930015	0.90239	23098/51071/5151/38/22978/11332/51733/25939/23417/10846/10591/83594/8622/5144/4968/84618/23583/30833/1854/8930/272/4907/55270/8654/6996/79661/252969/7498/5152/3251/25961/3094/27115/5142/5138/1806/2272/100/9583/131870/5150/56953/390916/11165/79873	45
GO:0048678	response to axon injury	45/8285	69/14199	0.149551	0.930015	0.90239	23098/3670/1495/3776/3717/25828/5905/8428/5802/5764/6505/1809/10675/2043/4548/2281/4149/9315/9314/9856/2247/23162/3480/4916/6647/5792/29956/2695/81565/5604/983/118812/596/2596/1605/3725/56963/83999/2316/5336/4914/9860/22876/1719/1270	45
GO:0032259	methylation	210/8285	343/14199	0.149564	0.930015	0.90239	4800/23028/1387/55904/3720/10157/51603/672/51230/51106/5926/54888/51742/58508/639/6894/93166/9682/6688/60487/79091/53615/11176/55183/79977/10269/546/2122/339175/1789/1312/23411/9739/9463/79609/64863/10664/79918/2935/84148/2146/23081/2625/117246/2145/6830/7468/51111/11108/84274/56341/4839/59336/9555/51409/55683/55818/63892/23463/55870/7799/4548/6018/387338/51611/4297/196483/1788/3070/5110/2107/816…	210
GO:1901293	nucleoside phosphate biosynthetic process	140/8285	226/14199	0.149571	0.930015	0.90239	204/10165/65220/60481/159/56474/50484/2983/4199/5165/80347/2182/2023/38/9605/32/27231/108/1738/139596/11332/6576/4522/5634/23417/4833/23475/23205/2639/10135/2617/3614/51422/203/506/83594/8382/7372/523/1716/8604/8942/271/515/6785/113/3208/8034/2181/514/5740/51000/27109/80025/10606/1854/1635/83549/5538/47/5160/272/517/4609/109/471/83666/60490/9061/5636/29922/7371/55811/142/5631/50808/51144/134145/1…	140
GO:0002092	positive regulation of receptor internalization	17/8285	24/14199	0.150232	0.930015	0.90239	84062/9463/2332/6424/7422/9779/967/54806/84896/1950/409/284/1173/6850/3643/9863/5336	17
GO:0005979	regulation of glycogen biosynthetic process	17/8285	24/14199	0.150232	0.930015	0.90239	3479/89801/2932/10580/208/2645/23178/8445/55829/51763/207/3643/9852/8660/5167/5500/90673	17
GO:0010962	regulation of glucan biosynthetic process	17/8285	24/14199	0.150232	0.930015	0.90239	3479/89801/2932/10580/208/2645/23178/8445/55829/51763/207/3643/9852/8660/5167/5500/90673	17
GO:0036010	protein localization to endosome	17/8285	24/14199	0.150232	0.930015	0.90239	11215/55737/88455/7430/8829/85377/51104/11021/55754/9475/58489/6653/5962/1950/4478/382/253725	17
GO:0048665	neuron fate specification	17/8285	24/14199	0.150232	0.930015	0.90239	3670/58524/2736/2737/51684/4821/3236/3169/3110/4916/63950/5457/30012/474/3226/5454/23040	17
GO:0048668	collateral sprouting	17/8285	24/14199	0.150232	0.930015	0.90239	23105/9706/25/51199/5802/23242/1855/2258/23111/2045/351/23566/627/8408/9798/1946/10507	17
GO:0051560	mitochondrial calcium ion homeostasis	17/8285	24/14199	0.150232	0.930015	0.90239	55013/63933/6547/10367/79085/83636/10989/5910/10939/286097/90550/27185/221154/118987/3954/487/51024	17
GO:0051894	positive regulation of focal adhesion assembly	17/8285	24/14199	0.150232	0.930015	0.90239	26073/6093/9448/10979/25/8829/9647/7422/57669/9270/5879/5795/7248/4088/3987/6281/342184	17
GO:2000637	positive regulation of miRNA-mediated gene silencing	17/8285	24/14199	0.150232	0.930015	0.90239	23369/2332/1655/8087/7538/4613/9698/1660/93649/7157/126374/8994/1956/7073/6774/5604/131405	17
GO:0009117	nucleotide metabolic process	263/8285	432/14199	0.15054	0.930441	0.902804	23098/204/10165/54677/65220/10157/60481/55/3479/51071/159/56474/50484/2983/55711/4199/5214/5315/387/5165/9759/80347/2182/6095/5151/2023/38/9605/1739/25996/32/22978/27231/51548/57103/108/5236/8671/5663/260425/1738/139596/11332/51733/6576/9567/2033/3091/4522/25939/5634/5230/23417/4833/23475/23205/2639/10135/4967/2617/3614/51422/2645/203/2584/230/51166/506/2597/7167/51715/10846/10591/83594/3157/8382…	263
GO:0048015	phosphatidylinositol-mediated signaling	90/8285	143/14199	0.150645	0.930441	0.902804	51384/5286/1634/3479/3082/9846/23026/80243/5291/4734/56005/2260/5289/1906/634/57605/55763/7430/7042/23411/3717/5332/4150/8395/2625/59338/219699/6198/708/867/4883/7337/23007/2335/84812/5334/847/5290/7291/10617/10385/5342/5287/5156/79899/153090/55165/2247/1950/3480/4916/207/8394/57624/56034/1956/8473/4915/56623/25827/284/118788/3815/113026/5783/4824/197358/4920/5747/25948/80310/3643/10125/767/2066/…	90
GO:0009150	purine ribonucleotide metabolic process	201/8285	328/14199	0.150775	0.930441	0.902804	204/10165/54677/10157/60481/3479/159/2983/55711/5214/5315/387/5165/9759/80347/2182/6095/5151/2023/38/9605/1739/32/22978/51548/57103/108/5236/8671/5663/260425/1738/11332/6576/9567/2033/3091/5634/5230/23417/4833/23205/2639/4967/3614/51422/2645/203/2584/230/51166/506/2597/7167/51715/10846/3157/8382/3156/8622/5144/523/1716/8604/271/515/84618/6785/9414/1743/113/8034/23597/2181/514/51000/27109/30833/80…	201
GO:0007034	vacuolar transport	93/8285	148/14199	0.151497	0.933912	0.906172	4074/3920/27072/51534/23274/9765/55187/84067/55850/55737/4734/7251/7879/25978/51510/29911/10042/10490/128866/54602/22898/59284/54664/3312/79158/411/51652/9525/55297/4035/23163/22863/54832/27243/80762/27183/8546/55207/6272/51361/9392/9648/51028/8027/63971/6653/65082/79720/4864/114804/93343/59283/81609/1130/388/51542/245972/203228/55293/63894/143187/57724/137492/10239/11267/23400/7805/138050/164/55…	93
GO:0051384	response to glucocorticoid	73/8285	115/14199	0.152529	0.939294	0.911394	8837/799/3670/1373/10076/387/4129/490/5743/1906/594/5978/7023/10081/3717/23205/2692/6198/595/4192/2690/2908/590/90/3485/6382/54206/2309/687/5290/11335/10888/7538/1036/5111/3586/1545/2660/9101/306/121278/3480/4916/9353/6715/5066/1977/498/678/10018/3192/114907/5207/6781/1636/808/249/3490/552/21/11170/596/361/7352/8061/7298/6586/64754/677/7332/3931/358/632	73
GO:0014068	positive regulation of phosphatidylinositol 3-kinase signaling	40/8285	61/14199	0.154521	0.942426	0.914433	51384/1634/3479/3082/4734/56005/2260/7042/23411/3717/4150/219699/867/7337/2335/847/5156/79899/2247/1950/3480/4916/56034/4915/284/118788/3815/4824/4920/5747/80310/3643/2066/3059/2149/4919/10507/5649/5154/4914	40
GO:0009259	ribonucleotide metabolic process	211/8285	345/14199	0.154633	0.942426	0.914433	204/10165/54677/10157/60481/3479/159/56474/2983/55711/5214/5315/387/5165/9759/80347/2182/6095/5151/2023/38/9605/1739/32/22978/51548/57103/108/5236/8671/5663/260425/1738/139596/11332/51733/6576/9567/2033/3091/5634/5230/23417/4833/23205/2639/4967/3614/51422/2645/203/2584/230/51166/506/2597/7167/51715/10846/3157/8382/3156/8622/5144/7372/523/1716/8604/271/515/84618/6785/9414/1743/113/8034/23597/2181/…	211
GO:0021799	cerebral cortex radially oriented cell migration	22/8285	32/14199	0.154888	0.942426	0.914433	5048/23224/3912/2737/26468/57178/57142/153090/7804/27185/285025/23353/81565/1499/653464/84750/1600/2290/8851/5454/5649/5455	22
GO:0040001	establishment of mitotic spindle localization	22/8285	32/14199	0.154888	0.942426	0.914433	5048/54908/23291/23332/10403/9183/3837/10253/55755/51203/6993/79648/3688/2697/23122/10252/4085/81565/5347/89958/3064/137886	22
GO:0044319	wound healing, spreading of cells	22/8285	32/14199	0.154888	0.942426	0.914433	960/387/10979/23332/634/55612/1839/11235/6239/1861/83478/23671/90102/6868/146206/2909/10630/23122/977/57591/2316/2475	22
GO:0060317	cardiac epithelial to mesenchymal transition	22/8285	32/14199	0.154888	0.942426	0.914433	51384/7049/7042/7472/7046/2022/2253/90/57142/7291/6615/10439/6926/23493/4089/27250/4487/10252/23462/55273/3516/9241	22
GO:0090505	epiboly involved in wound healing	22/8285	32/14199	0.154888	0.942426	0.914433	960/387/10979/23332/634/55612/1839/11235/6239/1861/83478/23671/90102/6868/146206/2909/10630/23122/977/57591/2316/2475	22
GO:0120033	negative regulation of plasma membrane bounded cell projection assembly	22/8285	32/14199	0.154888	0.942426	0.914433	9912/4134/10198/2665/5909/9738/23189/7016/4117/57489/117177/83478/84260/115704/9353/51256/107080638/653464/79598/8558/347240/51466	22
GO:0009124	nucleoside monophosphate biosynthetic process	27/8285	40/14199	0.154961	0.942426	0.914433	159/139596/5634/3614/7372/1716/271/10606/1854/1635/83549/272/471/7371/5631/132/1633/51727/8833/318/3251/7084/7298/3615/122622/100/158	27
GO:0032768	regulation of monooxygenase activity	27/8285	40/14199	0.154961	0.942426	0.914433	5291/949/3091/2717/857/10392/4790/1594/7421/4883/11315/8074/92/2643/7014/207/51070/1956/116150/808/2672/7015/538/2668/340481/9722/1719	27
GO:0034205	amyloid-beta formation	27/8285	40/14199	0.154961	0.942426	0.914433	3479/6093/8301/5663/57142/2043/51107/23163/6253/10313/9475/6653/6252/5664/4915/114134/1859/9619/23385/10972/5621/9001/6667/54103/23621/55851/10418	27
GO:0060412	ventricular septum morphogenesis	27/8285	40/14199	0.154961	0.942426	0.914433	2263/7049/7042/7046/657/7468/7474/3280/90/6659/53834/6926/23493/4089/9353/60485/8321/64783/23462/3516/6091/23414/161882/9241/6586/6092/659	27
GO:0030902	hindbrain development	82/8285	130/14199	0.156429	0.950111	0.92189	1272/23026/3309/2296/6095/7515/2736/5362/4983/5663/8455/84678/16/372/25861/25/1399/655/23322/8925/136319/4967/3199/2146/6532/2648/4669/4192/2735/653/3280/5013/79971/8443/58155/9928/3213/79809/146057/8854/23287/54806/22891/471/3184/2247/1950/6751/3480/7157/473/4781/3688/5457/2895/2047/23385/91137/27089/57107/2020/538/1152/1398/1499/5604/4204/200894/596/85442/1600/9001/6712/3212/8851/5781/2624/18/8…	82
GO:0009144	purine nucleoside triphosphate metabolic process	51/8285	79/14199	0.156709	0.950111	0.92189	10165/387/2023/9605/9567/25939/4833/3614/51422/506/51715/8382/523/1716/8604/515/514/27109/5901/517/55270/4609/79631/29922/142/50808/134145/498/518/522/221264/132/318/509/3948/10632/10476/521/55669/3615/347736/527/5465/120892/100/131870/4976/790955/9551/539/4831	51
GO:0009791	post-embryonic development	51/8285	79/14199	0.156709	0.950111	0.92189	2067/54542/639/2263/10512/5663/546/3717/25/54928/10848/7046/2625/59338/57003/113246/7915/7422/2566/93/55870/34/10765/48/27161/64919/23418/3658/9314/57282/4594/472/84159/10018/4929/4643/23515/4880/25976/2200/8879/4204/6335/596/4087/6887/3482/23334/2475/26058/6414	51
GO:0061458	reproductive system development	227/8285	372/14199	0.157148	0.95179	0.923519	2288/3207/7812/2067/10046/5926/9820/1495/3309/4254/54477/51742/2296/4438/639/8531/841/51665/259266/2263/22846/26528/5743/10371/1739/4036/79977/8648/546/4216/10959/3294/25831/7042/4436/3326/23411/1399/5594/23598/79879/11144/51493/8846/3091/6789/655/22862/2254/6299/23205/6788/268/2116/5764/7472/10049/3209/4521/2737/7046/2625/59338/2253/595/329/867/1594/2735/7421/57122/1432/653/7422/9421/8614/7337/7…	227
GO:0007224	smoothened signaling pathway	85/8285	135/14199	0.157452	0.952087	0.923807	1387/1495/57545/28996/2263/57560/6095/2121/2736/7289/51668/11020/9786/51098/2254/23322/64927/79989/2737/51684/51174/90410/83871/2735/5992/79770/3280/55081/6738/8643/26123/55717/6491/79809/860/4821/8445/146057/3169/4294/22856/22873/80210/5082/26160/403/55212/5925/25989/2622/5567/23432/51057/64839/51473/221322/2719/26091/55835/7545/57728/199221/755/4825/55764/27152/64399/154865/5015/8945/374654/473…	85
GO:0034446	substrate adhesion-dependent cell spreading	65/8285	102/14199	0.157521	0.952087	0.923807	9341/387/55679/10979/6480/2192/8516/55604/57091/8455/5829/22798/3912/25/8829/1399/11078/8874/1955/23189/7016/26033/708/9404/4192/23603/10675/3676/2335/335/9928/9270/57580/6239/3915/5879/3685/55435/64098/23671/80005/83706/1793/2241/10461/10630/22854/10109/4241/79778/1398/5747/84168/5881/3987/253725/79834/811/1946/10519/5034/29780/2316/55742/6281	65
GO:0016073	snRNA metabolic process	35/8285	53/14199	0.159155	0.953726	0.925397	6617/55596/23517/23016/10179/64863/26512/55756/55174/8178/51010/57508/22936/11340/79871/79066/79664/23404/1736/114034/10208/57117/25896/84524/92105/23379/55656/6619/6621/7702/5394/10302/51574/80789/118460	35
GO:0060998	regulation of dendritic spine development	35/8285	53/14199	0.159155	0.953726	0.925397	5048/27067/84062/23105/816/25791/5597/5063/5663/4208/2332/5802/22849/9148/1982/23316/7337/547/4076/3706/10097/8499/221935/50807/54149/7804/100528062/27185/382/22871/26115/653464/5649/3066/80823	35
GO:1901224	positive regulation of NIK/NF-kappaB signaling	35/8285	53/14199	0.159155	0.953726	0.925397	5610/54542/387/3430/1906/2033/54976/8717/10725/10392/23328/8809/9111/10616/192669/84868/149041/351/1956/6188/27250/4306/1896/7805/7098/54765/54386/5245/3987/7189/811/219790/3654/11331/1654	35
GO:0036503	ERAD pathway	68/8285	107/14199	0.159316	0.953726	0.925397	3309/51528/8975/4287/27248/6400/54431/55741/111089941/80020/9097/55757/6449/857/10613/57003/7466/4121/23197/80267/26270/7706/55829/9695/337867/29979/84900/56886/23392/1861/79139/51439/55298/91445/57333/23190/84236/285533/10299/11160/54788/55768/1047/29761/267/118424/126433/201595/79982/91147/79089/202052/11236/10869/9024/11253/811/55432/91304/7327/11124/5071/29978/51136/258010/51465/7844/51608	68
GO:1990542	mitochondrial transmembrane transport	54/8285	84/14199	0.159641	0.953726	0.925397	10165/55013/63933/51660/5250/6576/6547/10469/92609/9512/10367/80273/1374/29074/55186/8604/29103/92014/57380/79085/7263/22/87178/64116/10939/147407/5664/3329/54977/51312/83447/291/9868/81894/286097/90550/118980/9131/1376/131474/94081/221154/3954/84275/9804/7352/168620/284427/83733/89874/119559/387990/11194/7416	54
GO:0008090	retrograde axonal transport	15/8285	21/14199	0.1599	0.953726	0.925397	5048/23291/10749/547/23287/84709/6647/66000/1740/667/81565/3799/9001/84871/1778	15
GO:0009083	branched-chain amino acid catabolic process	15/8285	21/14199	0.1599	0.953726	0.925397	38/56922/594/1738/587/11112/3155/4329/3712/1629/54511/549/27034/36/26275	15
GO:0009312	oligosaccharide biosynthetic process	15/8285	21/14199	0.1599	0.953726	0.925397	2530/10402/2683/81849/6487/6483/2203/124872/4247/2525/8708/10690/2524/10317/2526	15
GO:0010954	positive regulation of protein processing	15/8285	21/14199	0.1599	0.953726	0.925397	2023/4627/55848/10162/9532/84236/101/7123/4241/3818/302/147372/6900/6281/10418	15
GO:0021846	cell proliferation in forebrain	15/8285	21/14199	0.1599	0.953726	0.925397	2263/5108/9253/2737/80709/2253/85440/9928/6496/10642/27185/84376/153241/5454/5455	15
GO:0048199	vesicle targeting, to, from or within Golgi	15/8285	21/14199	0.1599	0.953726	0.925397	8452/56681/10959/8729/10342/59349/55435/1453/9919/84364/51128/10972/84984/26286/10016	15
GO:0060333	interferon-gamma-mediated signaling pathway	15/8285	21/14199	0.1599	0.953726	0.925397	7294/3326/3717/3055/11140/6772/9111/5469/5468/83666/84166/7157/3716/54625/5771	15
GO:0071378	cellular response to growth hormone stimulus	15/8285	21/14199	0.1599	0.953726	0.925397	5829/3717/7297/3718/2690/9518/4609/51738/3716/6774/5747/6777/5770/55777/54741	15
GO:1901800	positive regulation of proteasomal protein catabolic process	71/8285	112/14199	0.160907	0.958758	0.93028	2729/54467/114881/51667/9604/8554/25897/5601/8975/4287/28951/55743/23609/51548/5663/2932/5705/6790/25831/9978/5716/2332/8312/9810/6449/51343/857/1855/9532/1452/7341/127544/29979/84900/4193/153090/255488/55212/91445/144165/160418/1453/207/64326/154214/6872/9781/57630/153769/10444/5701/79699/25898/285671/25820/5347/26263/344558/10221/26259/10425/5886/91304/5071/116224/29978/6613/120892/51136/65992/…	71
GO:1901888	regulation of cell junction assembly	103/8285	165/14199	0.161449	0.961013	0.932468	26073/5583/7414/27067/2042/22998/9423/9748/387/6093/55737/9448/10979/23332/2239/4208/25/8829/9647/23394/79953/27286/3551/857/2889/22943/1845/9693/5818/23603/23316/56940/7422/7474/1981/57669/5906/9270/6615/5908/23499/261734/5786/9475/577/2045/5879/7057/347902/4916/54828/351/51057/90102/26045/4915/5795/2895/10160/5789/2047/51738/8321/64084/100528062/1636/10611/23122/145581/382/7248/4088/1613/55209/…	103
GO:0090288	negative regulation of cellular response to growth factor stimulus	57/8285	89/14199	0.162217	0.962081	0.933504	8837/1634/25960/5291/28996/4734/10272/4036/57556/25805/25/2625/22943/64750/7323/7474/57045/5468/23111/10253/6498/153090/23213/6653/51496/7057/4091/2247/10140/1745/9353/8573/63978/9350/3087/10563/8321/90993/6497/7498/4681/100532736/221496/10252/168667/5654/2200/3592/10251/9241/9146/390598/5770/55959/51592/57154/10016	57
GO:0008406	gonad development	115/8285	185/14199	0.16262	0.962081	0.933504	3207/7812/2067/10046/5926/1495/3309/4254/51742/2296/4438/8531/259266/10371/4036/546/7042/4436/23411/1399/23598/11144/22862/2254/6299/23205/268/4521/7046/2625/59338/2253/595/867/57122/7422/7337/7474/6382/2309/157506/81930/92/10549/3623/8195/128637/8894/599/9667/5914/3021/4678/3295/7482/10468/192670/5156/269/83990/2516/4609/152006/1761/1545/3417/658/675/409/4089/6647/7110/9353/8893/6715/2796/472/84…	115
GO:0002204	somatic recombination of immunoglobulin genes involved in immune response	30/8285	45/14199	0.163101	0.962081	0.933504	2067/7158/7037/4292/9984/55183/4436/4683/51010/6830/7468/51111/9025/2956/7292/54537/80762/84787/23075/3586/121260/3329/22976/165918/200558/9156/3981/79915/56941/118460	30
GO:0002208	somatic diversification of immunoglobulins involved in immune response	30/8285	45/14199	0.163101	0.962081	0.933504	2067/7158/7037/4292/9984/55183/4436/4683/51010/6830/7468/51111/9025/2956/7292/54537/80762/84787/23075/3586/121260/3329/22976/165918/200558/9156/3981/79915/56941/118460	30
GO:0030838	positive regulation of actin filament polymerization	30/8285	45/14199	0.163101	0.962081	0.933504	55971/10344/10178/10787/387/1739/55604/3055/5216/57482/3071/11135/80115/51429/9873/10435/2241/4690/146206/10602/25802/10109/253260/382/5581/253725/23580/51466/2475/342184	30
GO:0043038	amino acid activation	30/8285	45/14199	0.163101	0.962081	0.933504	6301/55699/16/124454/2617/6897/5917/1615/10056/10352/55157/57505/57470/51520/4677/8565/79587/2058/79731/51067/7453/80222/10667/57038/3035/123283/3376/92935/283459/80755	30
GO:0045190	isotype switching	30/8285	45/14199	0.163101	0.962081	0.933504	2067/7158/7037/4292/9984/55183/4436/4683/51010/6830/7468/51111/9025/2956/7292/54537/80762/84787/23075/3586/121260/3329/22976/165918/200558/9156/3981/79915/56941/118460	30
GO:0050919	negative chemotaxis	30/8285	45/14199	0.163101	0.962081	0.933504	7869/9423/387/10371/10512/54437/57556/9037/7474/335/8828/55558/2045/10505/80031/3685/9353/223117/3084/6091/9723/8633/6586/1946/6092/23768/6585/10507/5154/91584	30
GO:0070849	response to epidermal growth factor	30/8285	45/14199	0.163101	0.962081	0.933504	8837/7175/2296/5151/5076/5594/1845/56940/4691/54206/5335/5469/7538/90417/51763/153090/4609/8826/5170/64762/207/1956/678/1915/4176/94056/6777/2066/5781/677	30
GO:0150115	cell-substrate junction organization	60/8285	94/14199	0.164483	0.969264	0.940474	26073/7414/2042/22998/9748/1308/387/6093/9448/87/10979/23332/3655/10580/25/8829/9647/8874/10391/1845/23603/56940/7422/57669/2335/9270/23499/3691/5786/9475/3915/55901/5879/7094/7057/54828/8394/51057/9922/90102/5795/667/23122/382/7248/4088/10982/1613/11170/5747/3987/596/79834/5339/71/1946/613/6281/8861/342184	60
GO:0006359	regulation of transcription by RNA polymerase III	20/8285	29/14199	0.165642	0.969646	0.940844	10178/9031/7629/57680/55290/8178/23451/7913/79664/10514/57521/84524/8467/23379/9188/7702/2972/2475/2074/25850	20
GO:0045616	regulation of keratinocyte differentiation	20/8285	29/14199	0.165642	0.969646	0.940844	5583/2296/6093/79977/55506/1594/7421/9555/54206/3204/8202/5469/7538/29841/9475/135228/360/677/10626/4831	20
GO:1901185	negative regulation of ERBB signaling pathway	20/8285	29/14199	0.165642	0.969646	0.940844	9961/5774/26469/7251/7879/5663/27131/5641/1845/867/868/54206/58533/153090/1956/5795/57732/5771/79643/27246	20
GO:0021879	forebrain neuron differentiation	25/8285	37/14199	0.165702	0.969646	0.940844	2263/10371/8829/4967/26468/57178/9693/3280/1746/8828/23314/64919/57688/55558/57282/1745/27185/27089/538/7314/166614/23440/79625/2290/2624	25
GO:0022602	ovulation cycle process	25/8285	37/14199	0.165702	0.969646	0.940844	3309/7042/23411/268/59338/5608/2309/7043/5156/2516/2660/658/409/9353/5066/9510/2661/8879/6777/344758/8204/6586/6092/7784/91603	25
GO:0022616	DNA strand elongation	25/8285	37/14199	0.165702	0.969646	0.940844	3980/4361/64710/10714/9837/79913/5422/4683/4173/3978/5425/4172/10111/25913/54617/5111/5983/1763/5984/7015/4176/283899/4798/8607/5426	25
GO:2000772	regulation of cellular senescence	25/8285	37/14199	0.165702	0.969646	0.940844	4904/22846/5933/384/10269/23411/25/1021/657/26271/6787/10783/6909/7291/9521/7014/87178/7157/8091/7015/115004/26156/5074/55532/11179	25
GO:0007389	pattern specification process	251/8285	413/14199	0.167533	0.974432	0.945489	56603/1856/3207/57585/22955/3670/3224/7092/1767/8481/57545/2296/58524/28996/2263/2736/10371/10512/5076/5362/7289/1906/5991/5663/4208/4036/51668/79728/10959/6790/84678/1947/10683/7093/80173/5125/8829/1399/162/2033/3091/51098/655/23509/9371/57534/4281/8312/23322/56917/8701/7472/3199/3200/3202/3203/23242/2737/9355/7046/2022/657/2253/51684/22943/3216/2648/579/7704/2735/5992/653/9096/9421/4090/84100/2…	251
GO:0006892	post-Golgi vesicle-mediated transport	66/8285	104/14199	0.168229	0.974432	0.945489	27032/114879/9135/57120/9341/23041/10640/27252/23033/10890/9522/2060/55614/55763/23256/8773/10490/10139/23062/57020/8729/114815/83871/55770/64083/149371/8548/51552/55297/2181/80262/23163/54520/23499/4430/54832/60412/3996/6272/63971/6653/403/54536/55435/55204/51542/23233/2803/9919/143187/261729/10239/7805/81693/164/11031/29091/150684/1176/2580/51479/3916/4644/23230/6248/6844	66
GO:0097581	lamellipodium organization	52/8285	81/14199	0.169246	0.974432	0.945489	51177/960/6642/7414/10787/6624/55604/3983/8874/23189/23603/8936/64083/10096/55704/5290/6239/79902/9459/92154/10810/10451/5879/10006/5168/10097/2660/10152/9353/55909/3688/2241/5800/3815/4690/10163/26053/146206/7410/10630/10109/84448/538/1901/22885/79647/221178/29780/2475/6643/11344/55845	52
GO:0045010	actin nucleation	33/8285	50/14199	0.169838	0.974432	0.945489	85477/10787/55604/9463/8976/10094/8936/10096/10095/9026/10810/56907/81873/9873/10097/10152/55435/375/10788/133746/10163/146206/126820/56203/25802/10109/27236/9897/51466/84501/10552/342184/55845	33
GO:0006901	vesicle coating	13/8285	18/14199	0.170158	0.974432	0.945489	8452/56681/10959/8729/10342/59349/1453/9919/84364/51128/10972/26286/10016	13
GO:0015693	magnesium ion transport	13/8285	18/14199	0.170158	0.974432	0.945489	57185/84061/79815/7991/57380/84102/81614/54805/152519/93380/348938/54503/23390	13
GO:0019081	viral translation	13/8285	18/14199	0.170158	0.974432	0.945489	7812/9474/51386/8662/8661/440275/8666/1660/6741/1939/9140/5094/28985	13
GO:0019896	axonal transport of mitochondrion	13/8285	18/14199	0.170158	0.974432	0.945489	6683/3091/51566/66008/23287/84709/9638/7345/9001/22906/84871/4976/3281	13
GO:0021533	cell differentiation in hindbrain	13/8285	18/14199	0.170158	0.974432	0.945489	6095/4983/8925/136319/79809/23287/2895/91137/538/85442/2624/9241/8861	13
GO:0033151	V(D)J recombination	13/8285	18/14199	0.170158	0.974432	0.945489	5423/6929/6932/78996/64919/9730/472/7518/64421/3148/5896/3981/5591	13
GO:0044346	fibroblast apoptotic process	13/8285	18/14199	0.170158	0.974432	0.945489	637/8452/9262/57680/5290/4609/7157/10018/10428/9263/8539/2621/7516	13
GO:0045822	negative regulation of heart contraction	13/8285	18/14199	0.170158	0.974432	0.945489	6717/3717/5144/2281/148/80763/8654/476/156/488/125111/55328/7442	13
GO:0045947	negative regulation of translational initiation	13/8285	18/14199	0.170158	0.974432	0.945489	7175/27102/2332/51247/27161/400961/468/440275/1965/1979/5936/1978/8637	13
GO:0046794	transport of virus	13/8285	18/14199	0.170158	0.974432	0.945489	23633/2060/2332/3839/10332/857/9972/684/6993/9397/3838/53373/440400	13
GO:0060487	lung epithelial cell differentiation	13/8285	18/14199	0.170158	0.974432	0.945489	79977/55151/3202/4048/1385/25803/7067/3169/2302/4781/7068/60485/3516	13
GO:0071545	inositol phosphate catabolic process	13/8285	18/14199	0.170158	0.974432	0.945489	9108/3632/8871/8898/54928/8821/51763/3612/56623/3628/8867/3633/11165	13
GO:0110154	RNA decapping	13/8285	18/14199	0.170158	0.974432	0.945489	23644/83594/7538/25819/167227/27257/56478/55629/131870/29883/197135/11165/55802	13
GO:1990840	response to lectin	13/8285	18/14199	0.170158	0.974432	0.945489	1387/2534/5063/2033/3551/3824/6885/4609/6850/64581/7189/5062/5336	13
GO:1990858	cellular response to lectin	13/8285	18/14199	0.170158	0.974432	0.945489	1387/2534/5063/2033/3551/3824/6885/4609/6850/64581/7189/5062/5336	13
GO:0030326	embryonic limb morphogenesis	72/8285	114/14199	0.171119	0.974432	0.945489	56603/3207/1387/5307/5915/7289/5663/79977/51776/7042/51098/655/2254/6299/23322/54928/1749/64327/3209/2737/657/2253/22943/4621/7704/7474/3065/1889/157506/6909/7291/8434/3227/860/5469/3235/3236/3239/8854/6926/7020/2201/4089/51057/3899/80856/221322/2768/2719/340419/341640/4154/2697/10018/57728/6497/28982/4487/27152/25836/1499/6474/4920/55636/3226/9241/5087/79659/9742/3066/140467/79583	72
GO:0035113	embryonic appendage morphogenesis	72/8285	114/14199	0.171119	0.974432	0.945489	56603/3207/1387/5307/5915/7289/5663/79977/51776/7042/51098/655/2254/6299/23322/54928/1749/64327/3209/2737/657/2253/22943/4621/7704/7474/3065/1889/157506/6909/7291/8434/3227/860/5469/3235/3236/3239/8854/6926/7020/2201/4089/51057/3899/80856/221322/2768/2719/340419/341640/4154/2697/10018/57728/6497/28982/4487/27152/25836/1499/6474/4920/55636/3226/9241/5087/79659/9742/3066/140467/79583	72
GO:1902414	protein localization to cell junction	55/8285	86/14199	0.171806	0.974432	0.945489	9912/7414/5874/5601/5590/56850/55737/10979/60/1739/2239/1832/51201/23370/59284/51599/3315/51104/1855/8649/9379/5818/7474/5906/9414/23096/84952/11127/1742/102/23162/91862/1740/9456/55625/23426/84885/2905/160622/3716/5913/83700/4218/10815/22871/3799/4884/22883/1605/5062/10082/71/27445/5649/5175	55
GO:0003281	ventricular septum development	44/8285	68/14199	0.173178	0.974432	0.945489	163/639/2263/7049/4036/25831/7042/9321/6299/3209/7046/2625/657/51684/7468/5754/7474/3280/90/11064/6659/53834/6926/23493/4193/4091/4089/9353/60485/8321/64783/23462/10818/84516/3516/6091/23414/161882/9241/6586/6092/5138/4194/659	44
GO:0071364	cellular response to epidermal growth factor stimulus	28/8285	42/14199	0.174378	0.974432	0.945489	8837/2296/5151/5076/1845/56940/4691/54206/5335/5469/7538/90417/51763/153090/4609/8826/5170/64762/207/1956/678/1915/4176/94056/6777/2066/5781/677	28
GO:1903202	negative regulation of oxidative stress-induced cell death	28/8285	42/14199	0.174378	0.974432	0.945489	2534/3082/5151/5978/23411/25793/3091/4233/3315/135112/8382/27429/11315/10131/468/3586/7295/207/23657/8321/55074/7248/9529/5598/1499/5071/120892/2876	28
GO:0002011	morphogenesis of an epithelial sheet	36/8285	55/14199	0.175464	0.974432	0.945489	1856/960/387/10979/23332/634/655/55612/284217/1855/653/1839/11235/7474/6654/6239/1861/83478/23671/90102/55327/6868/146206/2909/10630/23122/57057/94134/1605/3212/977/3214/57591/2316/2475/65979	36
GO:0051438	regulation of ubiquitin-protein transferase activity	36/8285	55/14199	0.175464	0.974432	0.945489	6224/54165/5663/8555/10059/25/8312/51343/3984/23142/26271/9532/6500/6209/11315/84930/6125/9349/84259/55527/6135/6167/55208/9184/701/4085/8945/9529/5347/648/10116/6201/11065/7334/7332/10210	36
GO:1903317	regulation of protein maturation	36/8285	55/14199	0.175464	0.974432	0.945489	26022/6196/2023/2734/4627/51098/1522/22900/55848/10162/5992/9532/7850/9528/6659/79094/7057/5567/84236/29934/101/831/861/7123/4241/3818/11236/5621/143458/302/147372/6900/120892/6281/3633/10418	36
GO:0044272	sulfur compound biosynthetic process	87/8285	139/14199	0.175651	0.974432	0.945489	2729/6482/60481/64132/84245/27430/3029/10402/5165/2182/38/32/4258/1738/4507/2678/6576/4522/23417/23205/2639/6505/7358/29940/10090/4548/6785/84068/262/2181/4552/51000/6487/79066/4357/79094/1036/11046/2686/5538/47/5160/22856/23563/55501/64579/9061/51380/494143/58478/56548/55790/51144/51074/1737/23657/4143/2132/5163/83539/284/1836/6483/875/102724560/23181/441024/79993/23305/8509/4144/55454/10678/790…	87
GO:0048639	positive regulation of developmental growth	90/8285	144/14199	0.176209	0.974432	0.945489	5048/6792/3479/22902/23327/8531/9423/2263/6857/7049/9175/32/1906/22999/4208/9962/825/7430/8829/23394/2254/51760/59284/7472/2692/3984/6387/657/2253/6198/1982/2735/8437/1432/7422/9037/2690/2335/1385/5357/6909/57699/8195/23499/10038/23025/51761/23493/2247/114804/207/2803/9472/118813/51738/27185/25836/57057/81565/5479/57611/3516/23414/983/4534/3643/55636/23566/596/6777/29882/9699/627/10409/2066/9798/…	90
GO:0006029	proteoglycan metabolic process	47/8285	73/14199	0.176578	0.974432	0.945489	1634/2137/64132/3479/54928/9806/7358/29940/10090/135152/3373/9917/64377/9375/9953/22856/55501/9394/23213/64579/658/1280/56548/55790/6934/26229/2132/9653/83539/92370/2135/133584/8509/1499/55454/90161/79625/126792/6448/51363/2131/266722/50859/55959/337876/659/222537	47
GO:0048762	mesenchymal cell differentiation	135/8285	219/14199	0.176937	0.974432	0.945489	51384/7869/3670/25937/23187/3082/55734/9820/2042/4254/2296/2263/6093/55593/7049/6949/10979/23332/10371/10512/5076/2260/1906/4208/54437/2932/1947/57556/7042/25805/8829/5594/10521/3091/655/7472/2146/7046/80709/2022/2625/657/2253/1655/4192/23603/653/9037/83989/5515/7474/3280/57669/90/57142/84695/2335/6772/2043/4139/59349/8828/7043/157506/7291/152007/6615/84172/8854/3169/10439/4017/9475/6926/23493/10…	135
GO:0008535	respiratory chain complex IV assembly	18/8285	26/14199	0.177403	0.974432	0.945489	1352/1355/617/55744/79072/6341/51241/51204/10063/285521/388753/51287/493753/28958/100303755/90639/389203/84334	18
GO:0016226	iron-sulfur cluster assembly	18/8285	26/14199	0.177403	0.974432	0.945489	10101/150274/10539/3313/22/81689/23479/9391/80224/64210/7498/2395/84191/200205/51218/27158/57128/9054	18
GO:0018200	peptidyl-glutamic acid modification	18/8285	26/14199	0.177403	0.974432	0.945489	29105/60509/2346/95681/23093/164395/25941/23287/79739/91978/142/340351/254173/158135/84871/154807/26140/123624	18
GO:0022011	myelination in peripheral nervous system	18/8285	26/14199	0.177403	0.974432	0.945489	23405/79152/10397/208/57211/3691/6647/207/4915/56288/3084/6497/91137/79628/1605/5339/5454/4763	18
GO:0031163	metallo-sulfur cluster assembly	18/8285	26/14199	0.177403	0.974432	0.945489	10101/150274/10539/3313/22/81689/23479/9391/80224/64210/7498/2395/84191/200205/51218/27158/57128/9054	18
GO:0032292	peripheral nervous system axon ensheathment	18/8285	26/14199	0.177403	0.974432	0.945489	23405/79152/10397/208/57211/3691/6647/207/4915/56288/3084/6497/91137/79628/1605/5339/5454/4763	18
GO:0042059	negative regulation of epidermal growth factor receptor signaling pathway	18/8285	26/14199	0.177403	0.974432	0.945489	9961/5774/7251/7879/5663/27131/1845/867/868/54206/58533/153090/1956/5795/57732/5771/79643/27246	18
GO:0051571	positive regulation of histone H3-K4 methylation	18/8285	26/14199	0.177403	0.974432	0.945489	55904/672/51230/1789/84148/55683/4297/1786/23168/54934/80349/4089/8473/22976/26053/1499/7469/9646	18
GO:1904353	regulation of telomere capping	18/8285	26/14199	0.177403	0.974432	0.945489	2067/11284/5588/23293/7515/4216/8550/5594/4683/80351/10111/4751/7014/3184/472/140609/2072/9212	18
GO:0009187	cyclic nucleotide metabolic process	23/8285	34/14199	0.177445	0.974432	0.945489	2983/6095/5151/108/10846/8622/5144/271/113/109/8654/55811/2977/5152/115/4880/2982/107/27115/111/5142/5138/5150	23
GO:0010092	specification of animal organ identity	23/8285	34/14199	0.177445	0.974432	0.945489	3207/3670/2263/5076/4208/4036/7472/2737/2253/22943/7474/3227/7482/2247/10252/10818/1499/3516/2668/8313/6091/2131/6092	23
GO:0043162	ubiquitin-dependent protein catabolic process via the multivesicular body sorting pathway	23/8285	34/14199	0.177445	0.974432	0.945489	4734/7251/25978/51510/128866/51652/9525/27243/27183/51028/8027/79720/10040/93343/137492/11267/51271/55048/79643/89853/390595/57132/27246	23
GO:0072528	pyrimidine-containing compound biosynthetic process	23/8285	34/14199	0.177445	0.974432	0.945489	1373/56474/139596/4833/8382/7372/1854/1635/83549/29922/7371/5631/26289/51727/7084/1841/1503/7298/200895/347736/27010/2475/4831	23
GO:0031497	chromatin assembly	102/8285	164/14199	0.177601	0.974432	0.945489	23028/22955/23304/7175/51773/53615/11176/51548/55183/7994/546/23411/55506/7290/23347/10664/8312/2146/2145/25842/83989/9555/3065/29855/6418/1788/3070/5290/11335/55355/57169/8970/50809/1786/23378/3021/4678/22880/51535/83852/10541/80312/5925/22893/146059/7157/23421/9869/257218/8091/8467/254048/3017/8365/554313/8208/130951/1487/5928/23272/3148/201161/80063/8085/10036/3008/4204/25942/8493/55729/23133/…	102
GO:0031032	actomyosin structure organization	108/8285	174/14199	0.177888	0.974432	0.945489	8837/54443/8452/22998/1265/387/6093/4205/9948/10979/23332/55160/10529/1906/55604/2037/23136/79822/5829/54822/825/10580/25/8829/9647/4627/10391/23370/79784/4233/3984/7046/7016/9124/5216/5573/4621/7126/221692/1894/57669/55704/7840/1266/335/9270/7043/10174/11155/23363/8195/2318/84952/29767/85415/51763/27183/4628/9475/80206/5156/29109/5879/85462/29766/7168/91807/4089/58/8476/23671/90102/221061/3688/1…	108
GO:0007179	transforming growth factor beta receptor signaling pathway	111/8285	179/14199	0.177949	0.974432	0.945489	1387/11171/2530/3309/4052/28996/6688/7049/10979/8516/51701/5829/8425/2734/7042/25805/3326/23411/10454/2033/54976/55612/8312/857/7046/2022/657/57178/64081/64750/83891/9404/112744/26036/56940/4015/4090/90/9480/4053/7043/4093/56937/8239/4435/57045/58533/9518/9113/5468/9315/6885/269/9392/55198/10253/7080/6498/6386/7057/4091/2660/2201/5045/5170/93649/409/7157/4089/63976/142/1030/6935/26524/6868/135228…	111
GO:2000060	positive regulation of ubiquitin-dependent protein catabolic process	67/8285	106/14199	0.179145	0.974432	0.945489	2729/54467/51667/9604/8554/25897/5601/28951/55743/23609/51548/5663/2932/6790/25831/9978/5716/8312/6449/51343/857/1855/1452/7341/127544/440730/29979/23287/4193/255488/55212/1950/144165/1453/207/64326/154214/6872/9781/57630/153769/10444/79699/7805/27185/25898/285671/25820/5347/26263/5747/11236/344558/10221/26259/64110/10425/5886/5071/84871/116224/29978/6613/120892/65992/57154/1454	67
GO:0043242	negative regulation of protein-containing complex disassembly	50/8285	78/14199	0.179503	0.974432	0.945489	85477/23274/89795/23332/119/55604/118/22974/11078/4281/11075/136319/57482/10297/829/23271/5290/29767/146057/2258/157922/23075/324/26586/5962/57159/29766/10300/9711/120/130271/57466/146206/56203/25802/23122/6314/58526/50810/6588/253725/6712/55254/79929/10519/6840/6709/830/22828/11344	50
GO:0007015	actin filament organization	244/8285	402/14199	0.179644	0.974432	0.945489	55971/10344/10083/85477/8522/23221/10178/22902/8452/1495/9564/55761/26999/10787/22998/10565/387/6093/9948/87/9886/10979/23332/55160/119/6624/1739/5063/10529/55604/2195/54434/118/57091/79822/5829/7018/7430/10580/3717/25/8829/9647/11078/9463/3055/5358/23406/10391/23370/136319/4233/23242/8976/3984/7046/23189/7016/9124/6387/5216/7126/57482/23603/10094/221692/8936/9037/1809/10096/55704/7456/390/7840/8…	244
GO:0006305	DNA alkylation	39/8285	60/14199	0.180194	0.974432	0.945489	55904/672/6688/53615/11176/79977/10269/546/1789/9463/64863/10664/2146/51409/6018/4297/1788/3070/5290/4552/1786/54496/56154/4609/142/63978/9219/136991/29104/163589/54815/4204/8493/55729/91646/57673/79813/7490/54737	39
GO:0006306	DNA methylation	39/8285	60/14199	0.180194	0.974432	0.945489	55904/672/6688/53615/11176/79977/10269/546/1789/9463/64863/10664/2146/51409/6018/4297/1788/3070/5290/4552/1786/54496/56154/4609/142/63978/9219/136991/29104/163589/54815/4204/8493/55729/91646/57673/79813/7490/54737	39
GO:0002244	hematopoietic progenitor cell differentiation	70/8285	111/14199	0.18042	0.974432	0.945489	54443/23376/4254/2296/5610/6688/2009/57623/10272/5134/83737/7520/5663/5978/54517/23335/25/9739/6655/6547/55512/84138/23094/1021/5803/2625/9841/3313/3280/6654/23215/3213/6659/51119/7153/8546/91298/10468/5156/55008/7157/641649/79819/118856/3815/1636/103/6886/51205/54502/167153/56339/83700/11051/1938/25942/26108/157570/596/4300/3981/4291/55526/2131/3214/282991/51441/1052/10443/5591	70
GO:0007127	meiosis I	70/8285	111/14199	0.18042	0.974432	0.945489	4361/23304/5888/4438/55706/9319/4292/7155/55063/10403/8438/6790/11144/5889/10635/26271/10111/7320/27030/84057/3306/151648/29893/7153/56154/192670/83990/29988/1761/50511/675/2177/1060/256006/7013/472/83447/10018/146956/56776/9133/130951/11077/164045/151246/5885/23353/7589/5347/145645/7314/339834/79703/2072/80010/317761/5890/5892/57697/84464/10388/25788/197342/6847/22887/100130958/100507650/1325/28…	70
GO:0000463	maturation of LSU-rRNA from tricistronic rRNA transcript (SSU-rRNA, 5.8S rRNA, LSU-rRNA)	8285-11-01	15/14199	0.180896	0.974432	0.945489	8886/23481/23560/117246/54680/11224/285855/6129/84365/84154/23246	11
GO:0000712	resolution of meiotic recombination intermediates	8285-11-01	15/14199	0.180896	0.974432	0.945489	4292/7155/7153/146956/164045/2072/80010/57697/84464/197342/1325	11
GO:0002091	negative regulation of receptor internalization	8285-11-01	15/14199	0.180896	0.974432	0.945489	84058/88455/8898/79890/1742/6386/26045/302/29978/124930/6311	11
GO:0006266	DNA ligation	8285-11-01	15/14199	0.180896	0.974432	0.945489	3980/11284/5888/7515/3978/7153/54840/7518/200558/3981/2547	11
GO:0007289	spermatid nucleus differentiation	8285-11-01	15/14199	0.180896	0.974432	0.945489	6732/9025/55818/5819/50511/7110/90780/3148/26108/9403/6847	11
GO:0009200	deoxyribonucleoside triphosphate metabolic process	8285-11-01	15/14199	0.180896	0.974432	0.945489	50484/25939/1716/1854/55270/221264/132/1841/7298/100/131870	11
GO:0009263	deoxyribonucleotide biosynthetic process	8285-11-01	15/14199	0.180896	0.974432	0.945489	50484/1716/1854/1635/26289/132/1633/6240/1841/6241/7298	11
GO:0009265	2'-deoxyribonucleotide biosynthetic process	8285-11-01	15/14199	0.180896	0.974432	0.945489	50484/1716/1854/1635/26289/132/1633/6240/1841/6241/7298	11
GO:0010452	histone H3-K36 methylation	8285-11-01	15/14199	0.180896	0.974432	0.945489	7468/55870/23476/56950/54904/22976/64324/55209/29072/54880/84193	11
GO:0010829	negative regulation of glucose transmembrane transport	8285-11-01	15/14199	0.180896	0.974432	0.945489	51548/2887/6814/55829/51763/55198/4609/1636/5579/5167/6248	11
GO:0032239	regulation of nucleobase-containing compound transport	8285-11-01	15/14199	0.180896	0.974432	0.945489	54888/7175/6830/11052/22916/55051/10657/9972/1660/29072/6248	11
GO:0032933	SREBP signaling pathway	8285-11-01	15/14199	0.180896	0.974432	0.945489	6720/55160/10959/10613/79794/10162/22937/83939/11160/267/3638	11
GO:0042159	lipoprotein catabolic process	8285-11-01	15/14199	0.180896	0.974432	0.945489	11313/26090/51104/1509/3949/5538/58489/84945/127018/55347/472	11
GO:0043517	positive regulation of DNA damage response, signal transduction by p53 class mediator	8285-11-01	15/14199	0.180896	0.974432	0.945489	1655/51147/9521/5366/472/22925/4487/161742/545/3090/200734	11
GO:0046385	deoxyribose phosphate biosynthetic process	8285-11-01	15/14199	0.180896	0.974432	0.945489	50484/1716/1854/1635/26289/132/1633/6240/1841/6241/7298	11
GO:0048520	positive regulation of behavior	8285-11-01	15/14199	0.180896	0.974432	0.945489	55737/29105/4208/2692/84251/135/51738/22871/4862/3066/4157	11
GO:0048820	hair follicle maturation	8285-11-01	15/14199	0.180896	0.974432	0.945489	54888/51083/7042/26133/55612/7474/11005/64434/1499/3516/4763	11
GO:0070242	thymocyte apoptotic process	8285-11-01	15/14199	0.180896	0.974432	0.945489	3091/3718/2737/7474/7157/84524/101/10018/1676/5896/100	11
GO:0071025	RNA surveillance	8285-11-01	15/14199	0.180896	0.974432	0.945489	23016/51010/54464/11340/55795/23404/53918/6832/8559/5394/118460	11
GO:0090110	COPII-coated vesicle cargo loading	8285-11-01	15/14199	0.180896	0.974432	0.945489	25956/56681/10484/10483/10802/22937/128637/22872/375056/6396/3638	11
GO:0110156	methylguanosine-cap decapping	8285-11-01	15/14199	0.180896	0.974432	0.945489	23644/83594/7538/25819/167227/27257/56478/55629/29883/197135/55802	11
GO:0150011	regulation of neuron projection arborization	8285-11-01	15/14199	0.180896	0.974432	0.945489	1856/4649/9175/1855/7474/23499/1742/4343/23426/22854/10251	11
GO:1902101	positive regulation of metaphase/anaphase transition of cell cycle	8285-11-01	15/14199	0.180896	0.974432	0.945489	996/8452/29945/51433/9587/9787/8881/5925/286053/81620/51434	11
GO:1902570	protein localization to nucleolus	8285-11-01	15/14199	0.180896	0.974432	0.945489	25885/705/5901/2752/4931/7015/7486/51068/84154/55035/54984	11
GO:1903427	negative regulation of reactive oxygen species biosynthetic process	8285-11-01	15/14199	0.180896	0.974432	0.945489	8837/2534/1497/387/11315/10131/22/225/5465/55532/84334	11
GO:1905564	positive regulation of vascular endothelial cell proliferation	8285-11-01	15/14199	0.180896	0.974432	0.945489	51548/2260/4192/3676/5335/2247/5170/6868/51738/6774/6667	11
GO:2000269	regulation of fibroblast apoptotic process	8285-11-01	15/14199	0.180896	0.974432	0.945489	637/9262/57680/5290/7157/10018/10428/9263/8539/2621/7516	11
GO:2001212	regulation of vasculogenesis	8285-11-01	15/14199	0.180896	0.974432	0.945489	634/9693/5906/10266/54453/23493/7498/23462/55662/55273/947	11
GO:0048599	oocyte development	31/8285	47/14199	0.181434	0.974432	0.945489	3479/64848/6196/9319/1906/79670/6790/11144/6795/5518/26271/79084/2309/23318/1761/8654/675/472/1909/163589/4880/9897/8085/1499/596/5139/221400/7784/23424/51441/347688	31
GO:0050435	amyloid-beta metabolic process	31/8285	47/14199	0.181434	0.974432	0.945489	3479/6093/8301/5663/57142/2043/51107/3416/23163/6253/10313/9475/6653/6252/5664/4915/114134/1859/1636/9619/23385/10972/5621/9001/25825/6667/54103/23621/4311/55851/10418	31
GO:0072666	establishment of protein localization to vacuole	31/8285	47/14199	0.181434	0.974432	0.945489	4074/3920/27072/9765/55187/4734/7879/59284/3312/79158/23163/54832/27183/8546/6272/9648/51028/8027/6653/79720/59283/137492/11267/7805/55048/26985/9146/30849/23230/57154/8031	31
GO:0014065	phosphatidylinositol 3-kinase signaling	73/8285	116/14199	0.181522	0.974432	0.945489	51384/5286/1634/3479/3082/23026/80243/5291/4734/56005/2260/1906/634/7042/23411/3717/4150/8395/2625/59338/219699/708/867/7337/2335/847/5290/7291/10617/10385/5342/5287/5156/79899/153090/55165/2247/1950/3480/4916/207/8394/57624/56034/1956/4915/56623/25827/284/118788/3815/5783/4824/197358/4920/5747/25948/80310/3643/10125/2066/3059/2149/205428/5343/4919/677/23396/10507/5649/4763/5154/4914	73
GO:0046546	development of primary male sexual characteristics	76/8285	121/14199	0.182467	0.974432	0.945489	3207/7812/2067/10046/5926/1495/4254/51742/8531/259266/10371/4036/546/7042/4436/1399/23598/22862/2254/268/4521/7046/2625/59338/595/867/7474/6382/81930/92/10549/3623/128637/8894/599/9667/5914/3021/4678/3295/7482/192670/5156/269/83990/2516/152006/1761/1545/4089/7110/6715/10184/84159/2674/2697/10018/3815/1636/3148/22836/7098/8879/4824/7536/11086/23414/7314/3643/598/596/7490/2175/5154/4914/8031	76
GO:0010212	response to ionizing radiation	82/8285	131/14199	0.183957	0.974432	0.945489	23028/672/2067/3309/57646/1161/5888/1535/7158/64710/5423/57103/7520/10269/8438/51720/51776/4436/23411/2625/1410/595/867/10635/1432/9025/5810/1894/1788/54617/63979/9575/4193/10010/4609/64240/580/675/90381/7157/64326/25896/142/388/2177/11011/85456/472/8091/144715/26272/7518/64421/22976/9577/84142/11073/165918/25836/23514/7486/121457/55159/598/596/5883/3981/545/375757/9112/11200/79184/55693/3014/254…	82
GO:0032868	response to insulin	136/8285	221/14199	0.184114	0.974432	0.945489	2729/8837/55971/1407/5286/9564/5588/5315/5590/64710/51083/490/6720/634/2932/10890/27131/114882/139596/10580/23411/7494/6430/64397/208/2887/2692/2645/23189/6198/2549/23371/9847/1432/2822/896/2690/8850/22937/2888/6772/6814/54206/6429/6513/3416/1408/847/5290/57727/4435/4149/54832/55829/5468/51763/5786/8471/6272/23175/324/1019/55198/9882/2058/3586/29988/4609/55667/6653/8412/2660/8615/3033/5925/376267…	136
GO:0061077	chaperone-mediated protein folding	42/8285	65/14199	0.184192	0.974432	0.945489	2288/3309/80331/1457/9141/10049/3315/3312/10728/3313/10575/64175/2281/6950/10808/10131/3306/6388/51303/10574/27348/1861/55898/54788/22948/9601/10694/1676/5824/7203/79982/10576/5479/7266/10491/202052/120526/3310/2580/51182/374407/30001	42
GO:0071230	cellular response to amino acid stimulus	42/8285	65/14199	0.184192	0.974432	0.945489	2729/2534/23304/58528/1535/3843/27244/84861/7494/22849/9148/8649/80315/1788/53335/599/23677/1786/51520/5156/3184/57521/1291/56034/1956/4915/6935/143686/197131/824/1536/538/26012/80310/598/153129/1282/389541/3182/1288/2475/729438	42
GO:0072665	protein localization to vacuole	42/8285	65/14199	0.184192	0.974432	0.945489	4074/3920/27072/9765/55187/4734/7879/51100/59284/3312/975/79158/57142/23163/54832/23677/27183/8546/79589/6272/9475/9648/51028/8027/6653/79720/59283/137492/11267/23400/7805/55048/55788/144577/26985/9146/389541/30849/23230/23334/57154/8031	42
GO:0071453	cellular response to oxygen levels	91/8285	146/14199	0.185371	0.974432	0.945489	8837/5291/28996/5165/6095/5743/2023/57103/1906/3776/23411/9463/3162/3091/6547/655/51378/5230/10397/665/857/51142/867/7422/2030/8614/80315/26355/523/2034/2043/4985/2309/1788/25950/7291/5740/50809/2792/468/112399/5468/7428/9475/29979/4193/83990/6326/4609/84709/7009/9520/7157/5366/207/890/2308/101/5163/79723/56776/571/9131/6781/7015/1536/538/360/7248/219736/55662/4824/10449/3516/5581/596/10869/79625…	91
GO:0010810	regulation of cell-substrate adhesion	115/8285	186/14199	0.185925	0.974432	0.945489	26073/7414/2042/340533/5291/22998/9748/4287/387/5590/6093/9448/55679/10979/6480/23332/2192/55604/2932/57091/285/151887/3717/25/8829/1399/9647/11078/6789/55612/8874/10391/1021/23189/7016/9806/708/1845/683/4192/23603/56940/7422/10675/57669/2335/335/9270/9480/3204/57580/6239/23499/54453/5786/9475/5879/7057/55435/8631/54828/50488/51057/1295/90102/5921/8573/80005/1029/6251/51144/5795/1793/5800/6695/74…	115
GO:0050807	regulation of synapse organization	109/8285	176/14199	0.186117	0.974432	0.945489	9912/5048/6792/2534/27067/84062/816/9423/25791/387/56850/55737/4734/2239/83992/5063/4208/4897/25/23394/79953/10857/27286/51104/9148/22943/3312/5818/23316/1432/7337/7474/1981/85461/2043/8828/9419/5552/547/577/2045/4076/58489/3586/153090/3706/10097/10152/347902/8499/4916/351/26045/4915/1006/2823/23657/5800/2895/9456/10160/5789/2047/51738/7804/8321/64084/100528062/22941/27185/10611/7534/145581/382/5…	109
GO:0010506	regulation of autophagy	195/8285	320/14199	0.186205	0.974432	0.945489	26073/114881/5286/1634/23376/823/3082/58528/535/23604/23274/51606/55187/5291/23118/57602/9474/8975/11178/9682/6093/55737/4734/1459/6720/23032/27074/5289/57103/27244/11043/2932/9706/10269/10059/27131/10558/55763/23256/51322/23411/25/51100/84861/9681/25793/3162/2033/51382/9517/3091/1917/128866/55613/11040/9100/84148/8925/8767/665/4233/10392/3315/6009/5599/1982/55626/10645/2597/7957/1611/8992/10641/…	195
GO:0000266	mitochondrial fission	26/8285	39/14199	0.18669	0.974432	0.945489	5898/1352/1634/10928/9650/55737/23259/10059/6790/80821/54332/56181/5468/8546/56907/113115/90550/91137/160140/65084/56947/5071/120892/54708/4976/51024	26
GO:0001825	blastocyst formation	26/8285	39/14199	0.18669	0.974432	0.945489	8452/26469/23081/6830/4848/705/9421/51639/57142/9927/23019/9113/54663/6498/80312/5045/285855/154197/63978/2551/6670/7784/27341/100/7004/9646	26
GO:0060964	regulation of miRNA-mediated gene silencing	26/8285	39/14199	0.18669	0.974432	0.945489	23369/1994/10269/2332/1655/8087/1981/7538/5468/4613/9698/84872/1660/9611/93649/7157/126374/8994/1956/7073/7015/6774/5604/9612/131405/373863	26
GO:0030219	megakaryocyte differentiation	34/8285	52/14199	0.187233	0.974432	0.945489	85477/4850/4208/79876/54997/2033/4015/5469/10006/4211/1030/5305/2313/2551/3815/10163/8365/554313/6886/64783/3148/10826/7564/6670/5781/2624/161882/222166/10519/26013/8364/8370/8367/8360	34
GO:0016239	positive regulation of macroautophagy	45/8285	70/14199	0.187584	0.974432	0.945489	1634/55187/27244/10558/51322/23411/51100/3162/9517/3091/8767/665/10392/55626/7957/8723/22930/25782/6885/5899/203228/401548/90678/143686/5305/291/9531/26353/60592/26086/5563/51375/7248/79837/5049/8408/29110/285180/6829/11152/3064/7405/7416/10715/8517	45
GO:0021675	nerve development	45/8285	70/14199	0.187584	0.974432	0.945489	3670/10371/5076/1906/6507/5205/5459/8829/23405/6299/3200/2737/3280/6152/3676/1889/8828/3213/4821/5582/55558/7020/23213/123041/10939/494470/57007/2561/1909/5457/2047/91137/1499/4902/4884/55636/1605/3212/627/2131/55959/104/4914/9860/91584	45
GO:0021680	cerebellar Purkinje cell layer development	16/8285	23/14199	0.190326	0.974432	0.945489	3309/6095/16/372/25861/8925/4669/9928/79809/23287/473/91137/27089/538/6712/8861	16
GO:0021801	cerebral cortex radial glia-guided migration	16/8285	23/14199	0.190326	0.974432	0.945489	5048/23224/3912/2737/57178/57142/153090/7804/27185/23353/1499/653464/1600/2290/8851/5649	16
GO:0022030	telencephalon glial cell migration	16/8285	23/14199	0.190326	0.974432	0.945489	5048/23224/3912/2737/57178/57142/153090/7804/27185/23353/1499/653464/1600/2290/8851/5649	16
GO:0034315	regulation of Arp2/3 complex-mediated actin nucleation	16/8285	23/14199	0.190326	0.974432	0.945489	10787/55604/9463/8976/8936/9026/10810/9873/10152/55435/375/10163/146206/126820/27236/55845	16
GO:0045943	positive regulation of transcription by RNA polymerase I	16/8285	23/14199	0.190326	0.974432	0.945489	56919/1663/7343/4691/84128/55127/387496/64768/6597/468/25926/11137/55646/23160/23133/2475	16
GO:0046039	GTP metabolic process	16/8285	23/14199	0.190326	0.974432	0.945489	387/9567/4833/3614/51715/8382/5901/79631/29922/50808/55669/3615/347736/120892/4976/4831	16
GO:0046949	fatty-acyl-CoA biosynthetic process	16/8285	23/14199	0.190326	0.974432	0.945489	60481/2182/6576/23205/2639/6785/2181/5538/51144/79993/23305/79071/197322/54898/201562/109703458	16
GO:0051570	regulation of histone H3-K9 methylation	16/8285	23/14199	0.190326	0.974432	0.945489	23028/3720/672/9682/55183/546/1789/23411/23081/55818/1786/80854/4204/10782/55693/5079	16
GO:1902410	mitotic cytokinetic process	16/8285	23/14199	0.190326	0.974432	0.945489	387/25978/51510/128866/10112/51652/9525/27243/27183/55165/9585/375/129531/10015/79643/57132	16
GO:1903319	positive regulation of protein maturation	16/8285	23/14199	0.190326	0.974432	0.945489	2023/4627/55848/10162/9532/6659/84236/101/7123/4241/3818/302/147372/6900/6281/10418	16
GO:1903859	regulation of dendrite extension	16/8285	23/14199	0.190326	0.974432	0.945489	9043/23327/6857/22999/9962/51760/59284/8437/53335/57699/23025/114804/9699/5071/50618/57154	16
GO:0031114	regulation of microtubule depolymerization	21/8285	31/14199	0.190339	0.974432	0.945489	6683/89795/23332/22974/4281/11075/10297/23271/146057/2258/157922/324/26586/57159/10300/23122/6314/58526/50810/79929/10519	21
GO:0036257	multivesicular body organization	21/8285	31/14199	0.190339	0.974432	0.945489	51534/7251/25978/51510/128866/51652/9525/27243/27183/51028/8027/79720/93343/137492/11267/55048/10015/79643/9798/9146/57132	21
GO:1900077	negative regulation of cellular response to insulin stimulus	21/8285	31/14199	0.190339	0.974432	0.945489	5588/5590/2887/23189/6198/23371/2888/57727/51763/55198/2660/5305/4690/5579/79837/10999/5771/4023/9021/5770/5167	21
GO:1904646	cellular response to amyloid-beta	21/8285	31/14199	0.190339	0.974432	0.945489	2534/3479/5663/2932/5641/3676/2043/2309/4035/599/58533/3480/773/351/142/2697/10018/781/2915/5621/23621	21
GO:0002182	cytoplasmic translational elongation	8285-09-01	12/14199	0.191793	0.974432	0.945489	16/22849/51611/89978/92715/285381/9147/120526/6181	9
GO:0006047	UDP-N-acetylglucosamine metabolic process	8285-09-01	12/14199	0.191793	0.974432	0.945489	5238/64841/6675/23443/4245/9945/10020/51005/124872	9
GO:0006534	cysteine metabolic process	8285-09-01	12/14199	0.191793	0.974432	0.945489	2729/2678/4357/7263/1036/51380/23657/875/102724560	9
GO:0006983	ER overload response	8285-09-01	12/14199	0.191793	0.974432	0.945489	3309/2932/57003/7466/55829/7157/54499/83734/10018	9
GO:0007028	cytoplasm organization	8285-09-01	12/14199	0.191793	0.974432	0.945489	57178/29842/6654/2120/163589/3799/8061/221400/23424	9
GO:0010421	hydrogen peroxide-mediated programmed cell death	8285-09-01	12/14199	0.191793	0.974432	0.945489	3082/25/4233/11235/10494/11315/2309/10131/5074	9
GO:0010755	regulation of plasminogen activation	8285-09-01	12/14199	0.191793	0.974432	0.945489	2023/1522/55848/7057/861/7123/4241/302/6281	9
GO:0010826	negative regulation of centrosome duplication	8285-09-01	12/14199	0.191793	0.974432	0.945489	672/4591/2648/56890/8850/55755/91147/4869/10432	9
GO:0030397	membrane disassembly	8285-09-01	12/14199	0.191793	0.974432	0.945489	5048/7443/10783/23175/5578/5579/81565/5347/23399	9
GO:0033182	regulation of histone ubiquitination	8285-09-01	12/14199	0.191793	0.974432	0.945489	23028/55100/9810/51366/11315/9320/56254/7334/9646	9
GO:0034086	maintenance of sister chromatid cohesion	8285-09-01	12/14199	0.191793	0.974432	0.945489	546/9555/55719/23383/84250/5925/286053/25836/23137	9
[truncated: 4,747 more rows]

## Sheet: Figure3-FS1B
Gene Ontology analysis of genes that showed splicing defects in RBMX-depleted cells (GOStats)
[truncated: 347 more rows]
